# Supplementary material for: Identification of mitochondria-related genes associated with anesthetics in patients undergoing off-pump coronary artery bypass grafting surgery
Source: Front Surg. 2025 Jul 9;12:1515732. doi: 10.3389/fsurg.2025.1515732 (PMC12283725; doi:10.3389/fsurg.2025.1515732)
Supplement: Supplementary Table S1 — Mitochondrial-related genes. [file Table1.xlsx]

## Sheet: Total MTRGs
mitochondrial-related genes
CYC1
SDHB
COQ7
SDHA
UQCRC1
COQ5
PDHA1
COQ9
MRPL12
ATP5F1D
COX5A
ISCA2
PMPCB
UQCRFS1
ATP5F1A
OGDH
PDHB
UQCRC2
SDHD
MRPS35
UQCRQ
MRPL53
DBT
PDK4
MDH2
MRPS27
CS
GRPEL1
DLAT
LRPPRC
DLST
PDHX
GFM1
MPC2
NDUFS1
MRPL46
ATP5F1E
SLC25A3
MRPS23
FH
PMPCA
ATP5F1B
SDHAF4
UQCR10
ISCA1
SUCLA2
COQ3
IARS2
MRPS15
IDH3A
COX11
ETFDH
TIMM10
MRPL34
MRPL2
BCKDHA
UQCRH
HIGD2A
ATP5PO
ECHS1
LETMD1
COX6A1
COX15
AFG3L2
HADHA
ETFA
NDUFS7
CPT2
BCKDHB
IDH3B
LARS2
ACADS
LETM1
ATP5ME
OPA1
AUH
SUCLG1
NDUFV2
COQ6
MRPL43
ABHD11
ATP5PF
NDUFB8
LONP1
DLD
AIFM1
ECHDC3
APOOL
MRPL10
MRRF
NDUFS8
ACADM
IMMT
TIMM9
SLC25A4
SAMM50
NDUFS2
NDUFV1
ACO2
SUPV3L1
FECH
MTIF2
PHB
HIBCH
MRPS2
HSPA9
SURF1
PRDX3
GHITM
GUF1
TIMM13
LYRM4
MRPL16
MRPL40
IDH3G
SDHC
NDUFB5
SDHAF2
COQ10A
GATD3A
TXN2
MRPS18A
COX6C
NDUFB9
MTCH2
NDUFA6
SLC25A20
MRPL1
TIMM44
COX17
MICOS10
SOD2
COX6B1
VDAC1
CLPP
HADH
ACADL
ACAT1
MALSU1
CLPX
NDUFS4
MRPL4
C1QBP
PITRM1
UQCC1
MRPL55
MRM1
MECR
MRPL44
HSDL2
MRPS14
ABCB8
ATPAF2
NDUFA9
COA6
POLRMT
ISCU
RTN4IP1
OGDHL
ATP5F1C
BCKDK
GFM2
NDUFAF4
SLC25A35
SLC25A11
TIMM8B
MCAT
IBA57
PHB2
DAP3
CMC2
SDHAF1
MRPS17
ADHFE1
NFS1
NDUFAF5
MRPL17
TACO1
MFN1
PPTC7
MRPL11
COX4I1
NDUFS6
MRPL13
OXCT1
COX5B
PDK2
ALAS1
MRPL33
MTO1
LIAS
NDUFA5
NDUFB6
MTX2
SUCLG2
FDX1
SLC25A1
MRPS28
TIMM50
VDAC2
SLC25A42
TOMM7
ECH1
GATB
BCS1L
ERAL1
CMC1
MRPL28
TSFM
FXN
NFU1
YARS2
MRPL21
ALDH4A1
TOMM40L
NDUFAF1
NDUFB10
ACADSB
MRPS9
COQ8A
ACADVL
COQ4
MRPL15
NDUFA2
MRPL24
HSPD1
NDUFS5
AK3
CYCS
MIPEP
LYRM7
CRAT
PCCB
MRPS7
MRPL3
PRODH
PCCA
MCCC1
MRPS12
CLPB
PDK1
MRPL49
COX7A2
TMEM126A
ECHDC2
HCCS
HIBADH
MRPL19
MRPL36
SLC25A30
BDH1
FARS2
ABCB7
MTX1
NDUFA7
TIMM17A
ALDH9A1
MRPS18C
MARS2
ALDH6A1
FDXR
GATC
TRAP1
ACAD8
ALDH2
PPIF
TIMM22
IVD
L2HGDH
ETHE1
MRPL20
SLC25A5
SLC25A12
MRPS21
TOMM22
ACAA2
MRPL30
DNAJA3
NDUFB2
MRPS34
ETFB
AFG1L
ATP5IF1
ATP5PB
COX7C
CHCHD3
COQ10B
ACSF3
POLDIP2
SLC25A10
SLC25A13
PDK3
ME3
MRPL22
IDH2
GCDH
MRPL47
PPA2
MRPL9
CHCHD10
WARS2
SLC25A19
CBR4
SMDT1
HAGH
COX7A1
MTG1
COX14
NDUFA12
MRPS16
MTERF2
ETFRF1
GPD2
NDUFA10
NDUFC2
SLIRP
MT-ATP6
MT-CO2
TIMM21
NDUFA8
GLS
NDUFB11
DHTKD1
FAHD2A
HSD17B8
HINT2
MRPS5
C6orf136
SPRYD4
LIPT2
DECR1
MRPS26
SLC25A15
NDUFV3
BPHL
STOML2
MSRB2
LACTB
TOMM40
SLC25A25
ADCK5
ACAD10
VWA8
CCDC90B
DNAJC11
ALKBH7
GLDC
MPC1L
THEM4
SSBP1
MRPL27
HSCB
MRPS10
AK4
ATAD3A
MRPL37
PTGES2
TXNRD2
ACSM5
CISD1
MRPL41
MTARC2
MRPS6
MRPL23
SQOR
SCO1
GCAT
MTHFD1L
ECI2
UQCRB
ATP5PD
ATP5MG
CCDC58
MCCC2
MCEE
MOCS1
MMUT
SLC25A51
SPG7
ATP5MC3
ATAD1
OXNAD1
MTG2
DARS2
MRPL51
PC
CLYBL
PNPLA8
MLYCD
PYURF
TIMM17B
MRPL32
SLC25A26
PRODH2
NIT2
FDX2
ME2
TUFM
COX6A2
SLC30A9
TAMM41
TIMM23
RMND1
MFN2
DNLZ
CHCHD4
NDUFAB1
ACSM1
COA5
COQ2
PDSS2
EHHADH
NDUFS3
ABCB10
CKMT2
MRPS25
ACAD9
COX16
FAM210A
ACOT13
CPT1A
DHRS4
PRELID2
CARS2
NIPSNAP2
NDUFB7
MICOS13
GLRX2
MRPS30
SCO2
HSD17B10
NARS2
RPUSD3
SUOX
SARDH
RIDA
COX8A
SPR
MPV17
ZADH2
MRPL18
ALDH1B1
CHCHD1
TIMM8A
VDAC3
SLC25A24
MPC1
SLC25A22
SLC25A31
SLC25A18
TRNT1
IDE
GSTK1
VARS2
HSPE1
MRPL54
MRPL38
MRPL58
MTCH1
TRIAP1
PTCD3
COX10
AKAP1
MRM3
AK2
TMEM70
NOA1
MCUR1
TMEM14C
NDUFC1
MRPL35
NDUFA3
PDSS1
SLC25A16
FMC1
ACSM3
NDUFAF6
UCP1
SFXN1
GLRX5
PTRH1
MRPS11
XPNPEP3
PDP1
ECI1
SLC25A21
SLC25A29
SLC25A45
SDHAF3
PRELID3B
SLC25A39
NDUFB3
REXO2
GATM
TIMM10B
SARS2
CHDH
MRPL57
C8orf82
EARS2
GRHPR
MTFMT
PTCD2
ECHDC1
HARS2
NDUFA4
NDUFA13
NAXE
TMEM11
SELENOO
NAGS
HSD17B4
NDUFAF7
OAT
MRPL50
COX7B
RARS2
OXLD1
LACTB2
NDUFA11
AURKAIP1
CHCHD7
SHMT2
MTHFD2
RMDN1
CPS1
MRPL14
MTRES1
RDH13
TRMT2B
MRPS24
COA3
GSR
ENDOG
BCAT2
TEFM
ACSF2
TRMU
MRPS22
LAP3
GLUD1
HMGCL
FHIT
MRPS33
NUBPL
LYRM2
MPV17L
GADD45GIP1
TFAM
ALDH18A1
OXSM
KYAT3
TARS2
TBRG4
TMEM65
ROMO1
PRDX5
DNAJC15
MAIP1
HIGD1A
C16orf91
RHOT2
SLC25A44
HAO2
OXA1L
SLC25A46
RDH14
ATP5MPL
CA5B
COASY
CISD3
GSTZ1
COX6B2
GLOD4
ACAA1
CROT
PDF
COX19
AMT
PDPR
NLN
BOLA1
ALAS2
GRPEL2
ALDH7A1
HDHD5
GFER
IMMP2L
COX4I2
MRPL39
AADAT
FUNDC2
LYPLA1
PDHA2
MTRF1L
GTPBP3
MTHFD2L
YME1L1
ACOT2
COA8
MMAB
PPOX
ABCD3
SIRT3
LDHD
MRPL45
C12orf65
IMMP1L
POLG
ATPAF1
BLOC1S1
ALDH1L2
COX18
CPOX
NNT
NDUFAF8
ATP23
DCAKD
ATP5MF
SFXN3
AASS
DIABLO
COX8C
PXMP2
AGXT2
GLS2
APOO
ACAD11
C5orf63
HOGA1
TTC19
NGRN
TCAIM
GCSH
SIRT5
GPT2
TOMM6
FAM162A
ABCB6
MACROD1
TST
MT-CO1
MTFR1L
SDR39U1
DMGDH
SLC25A14
PRELID3A
CHCHD5
TOMM70
NIT1
FAHD1
MCU
CYP27A1
MT-ND2
MT-ND4
MT-ND5
DELE1
FASTKD1
MRPS31
ALDH1L1
PTCD1
HADHB
TRIT1
CRLS1
GLYCTK
SLC25A32
AARS2
EXOG
CHCHD2
KMO
SFXN5
ELAC2
GPX1
CPT1B
FIS1
PRELID1
UCP3
SLC25A27
SLC25A40
SLC25A23
HEMK1
SLC25A36
OMA1
LETM2
DHRS1
STOM
METTL5
MSRA
NUDT8
NMNAT3
SLC25A38
MPV17L2
ACLY
ABCD2
FLAD1
LIPT1
DGLUCY
PCK2
NADK2
MPST
NUDT13
ACACA
ABAT
HMGCS2
ALDH5A1
CKMT1A
PISD
NDUFB4
UQCR11
FAM136A
TOMM5
HTRA2
NDUFA1
MT-CYB
GUK1
D2HGDH
OPA3
AKR1B10
PHYH
NDUFAF2
ECSIT
PARL
MRPL42
DNAJC4
PAM16
ALDH3A2
ACSL6
MRS2
ABHD10
HINT3
PXMP4
OSGEPL1
NUDT2
CYB5B
GRSF1
MRPS18B
DNAJC30
CAT
DGUOK
ACOT9
ACSS1
RFK
STARD7
CHPT1
MT-ATP8
TIMMDC1
SPATA19
HTATIP2
AKR7A2
DUT
MT-CO3
DHRS7B
MTRF1
TMEM143
NT5M
RHOT1
NME4
MTHFS
TIMM29
PNPO
MICU2
PCBD2
QRSL1
ADCK1
PRDX6
NIPSNAP1
GARS1
ACSM2A
SLC25A33
LYRM9
RAB24
PARS2
MRPL52
PUS1
GOT2
NAXD
MT-ND3
ACCS
PTRH2
PGS1
OXR1
LYPLAL1
DNAJC28
FPGS
TMEM205
SLC25A53
AIFM3
MGST1
MTFP1
COA4
NIF3L1
PUSL1
SDSL
BAX
MAVS
METTL17
ACACB
ARG2
MTPAP
CCDC51
SUGCT
DNM1L
NRDC
TMEM126B
NSUN4
ACSS3
FAM210B
RBFA
METAP1D
AHCYL1
NIPSNAP3A
MTARC1
FUNDC1
ACSL1
COX20
HSDL1
CBR3
MTERF4
NUDT19
HEBP1
PTPMT1
PGAM5
DTYMK
KARS1
STAR
DNAJC19
OTC
COX7A2L
MTERF3
SFXN2
FASN
PINK1
TMEM177
TXNRD1
THNSL1
FDPS
IDI1
TOP3A
FTMT
LDHAL6B
MTFR1
BCL2L13
TRMT10C
ACOT7
TFB1M
ARF5
MCUB
TWNK
MMADHC
PYCR2
TSTD1
LYRM1
OSBPL1A
RECQL4
PET100
GDAP1
MTIF3
UNG
GLYAT
ISOC2
ATP5MC1
QDPR
COQ8B
GTPBP10
TSPO
FTH1
TRMT1
ADCK2
TSTD3
MRPS36
PDP2
AGPAT5
MCRIP2
UCP2
SLC25A37
SLC25A28
SLC25A48
SLC25A43
SLC25A47
SLC25A41
SLC25A34
EPHX2
NUDT5
MICU1
SOD1
SERHL2
NDUFAF3
BOLA3
OCIAD2
RSAD1
CHCHD6
FASTKD2
PEX11B
TMEM186
PIF1
FABP1
ABCD1
PLPBP
DBI
PNPT1
TOP1MT
RNASEH1
ABCA9
SCP2
NT5DC3
CMC4
LDHB
YBEY
HINT1
MUL1
TK2
AGMAT
CMPK2
BID
ARL2
SYNJ2BP
MFF
DCXR
NUDT9
AMACR
VPS13D
NUDT6
DMAC2
MRM2
BAK1
DHODH
MAOB
MGST3
ACP6
MRPL48
AGXT
CYB5R3
DDX28
PNKD
MICU3
BNIP3
MTX3
MUTYH
GTPBP6
CYP11A1
OCIAD1
METTL8
SMIM20
RPUSD4
SMIM8
NME6
FKBP8
ACSM4
NLRX1
FOXRED1
TFB2M
PPM1K
ATP5MC2
MT-ND1
TAZ
MSRB3
ACOT11
NIPSNAP3B
NTHL1
MARCHF5
SFXN4
TRMT5
SLC25A6
SLC25A52
OGG1
ACOD1
QTRT1
AIFM2
PRDX2
FBXL4
GPAM
DMAC2L
RMDN3
PRXL2A
ATP5MD
PET117
MAOA
C15orf61
POLQ
BCO2
IFI27
CRYZ
PYCR1
TMLHE
TOMM20
YRDC
COA7
DHRS2
MMAA
MIEF1
C15orf48
LIG3
BNIP3L
FASTKD5
PARK7
COA1
COX7B2
MT-ND4L
SIRT4
UQCC2
USP30
PDE12
NME3
DHX30
FASTK
METTL15
CYP24A1
NOCT
PANK2
CA5A
NT5DC2
ATAD3B
TRUB2
PRKACA
COMTD1
CPT1C
C3orf33
MIGA2
SND1
GLUD2
HPDL
ANGEL2
ANTKMT
UQCC3
PRDX4
CDK5RAP1
PAICS
MGARP
HDHD3
CYP11B2
AGPAT4
RCC1L
FAM185A
PMAIP1
TDRKH
SLC8B1
CYP27B1
POLG2
THEM5
BIK
MTERF1
MTFR2
GPX4
TOMM20L
COMT
MYG1
SPATA20
OXCT2
CCDC127
CRY1
ACSM2B
MYO19
MGME1
SEPTIN4
EFHD1
RAB5IF
APEX1
SPTLC2
DMAC1
ATPSCKMT
NEU4
CASP9
AGK
MCL1
DUS2
PLD6
TOMM34
PRORP
PLSCR3
CKMT1B
NDUFB1
ATP5MF-PTCD1
CASP8
BCL2L1
EXD2
ARMC10
MIEF2
THG1L
GOLPH3
PREPL
FASTKD3
CEP89
GPAT2
NBR1
BOK
FKBP10
SETD9
CYP11B1
CSKMT
MIGA1
RPIA
BBC3
BAD
BCL2
BCL2A1
BCL2L2
CASP3
DMPK
DNA2
MT-ND6
PRKN
ALKBH1
PICK1
BCL2L10
AKAP10
STYXL1
NSUN2
ADCY10
SPHK2
NSUN3
PABPC5
PRSS35
PRIMPOL
SERAC1
STX17
TRMT61B
PDE2A
PLGRKT
ETFBKMT
RTL10
BCL2L11
SPIRE1
C2orf69
ARMCX2
ARMCX1
POLB
SNAP29
ARMCX3
ARMCX6
METTL4
SPHKAP
NAT8L
MCCD1
PIGBOS1
HTD2
RP11_469A15.2
LRRK2
HYKK
CREB1
ACSM6
DHFR2
ERBB4
FOXO3
TDRD7
ARL2BP
GARS
DIMT1
NR3C1
KARS
ATXN3
MPG
AKR1B15
NUDT1
PIN4
ADPRHL2
LRRC59
ACSS2
CCAR2
QARS
RAD51
RNASEL
ABCE1
RPS3
DUSP21
TP53AIP1
SHC1
ETNPPL
SNCA
BTD
TERT
TP53
TYMS
CHPF
CASQ1
ATG4D
PHYKPL
PARG
CCNB1
ATXN3L
KIAA0391
CDK1
UQCRFS1P1
NDUFC2-KCTD14
TIMM23B
ATP5MGL
ATP5F1EP2
UQCRHL
NDUFA4L2
WDR93
CNR1
COX7A2P2
MTLN
SARM1
LYN
ANKZF1
STMP1
SOX10
KIF28P
PLA2G4B
CEBPZOS
ABCF2
PEMT
HAX1
VAT1
TXNIP
MTCO2P12
RAB32
SLC27A3
CIDEA
CLU
CNP
SPATA18
SLC9B2
ATF2
BRI3BP
DUSP18
CYB5A
CYP1A1
CYP2E1
TDH
DAO
DDX3X
EPHA4
ACSL3
ACSL4
FGR
MLXIP
TRAK1
SPART
GRAMD4
LPIN1
SLC44A1
PPP1R15A
MTOR
IFI6
RNF144B
RAB11FIP5
GK
GK2
GPER1
TMEM14A
FLVCR1
UBIAD1
ANXA1
HK1
HK2
HSD3B1
HSD3B2
TMEM173
PNPLA7
SLC27A1
ARG1
LGALS3
SMCP
ASS1
MT3
MX1
MX2
MYOC
NME1
NME2
SLC11A2
NRGN
CISD2
PEBP1
SH3GLB1
ACSL5
PGR
PI4KB
PLA2G4A
PLN
VPS13C
PPP1CC
MSTO1
PPP2R2B
GIMAP5
AMBRA1
PRKCA
ADAP2
PSEN1
CIAPIN1
TIGAR
RAF1
RNF5
RPS6KB1
RPS27A
MOAP1
REEP1
TMEM135
SLC8A3
BNIP1
SORD
SRC
STAT3
VAMP1
TMBIM6
AC006538.1
DNM1P34
UBA52
UBB
UBC
VRK2
QTRT2
CALM1
CALM3
CAPN2
SNN
FZD9
C19orf12
SLC25A2
IFI27L2
SPNS1
PLEKHN1
ULK1
CARD19
GNPAT
OGT
ATCAY
CABS1
BECN1
CDS2
WASF1
FATE1
BMF
STARD13
RNF185
RSAD2
ABCG2
MAPK8IP1
IKBKE
SNPH
TRIM14
GLYATL1B
MTRNR2L5
COL4A3BP
BCAP31
AKAP8
GATD3B
EMC8
RACK1
OLFM4
YKT6
RAI1
ZBTB6
CD3EAP
ADAM28
PPARGC1A
JTB
BRD8
STARD3
YWHAQ
SDS
RIPK3
DEPP1
TRIM31
TPPP
CAPN10
SP140
PNKP
GPN1
TUSC2
AZIN2
TXNRD3
VASN
AGAP2
PDZD8
CLIC1
CLN3
IFI27L1
CCR7
WDR81
SNHG29
NLRP5
ADH5
PPARGC1B
TMEM71
NACC2
ASB9
CRYAB
PARP1
CRYM
TRUB1
MAPK14
TICAM1
CREB3L4
CYP1B1
GIMAP8
CYP2D7
CYP2D6
DDX1
DDX6
SPATA5
DHX36
DHFR
E2F1
ELK1
ELK3
MARK2
NAIF1
AKT1
ERN1
ESR2
EYA2
FANCG
ATAD3C
GLYATL2
ALKBH3
FEN1
PPM1E
FKBP4
SIRT2
FOXO1
KIF1B
SYNE2
PACS2
AGTPBP1
PPP1R13B
NCSTN
SIRT1
DDAH2
CASP14
HEBP2
RAB38
GABARAPL1
MAFF
ABL1
FYN
GK5
BCLAF3
C10orf67
FBXO7
CLIC4
KANK2
NGDN
KIF1BP
STAP1
SACS
MYCBP
GCK
GCKR
DAOA
GJA1
DISC1
APEX2
RPS6KA6
GLUL
GNRH1
SFN
RAB40AL
BLOC1S2
SIAH3
TMEM102
CAVIN1
DOK7
ANK2
GPS2
DCPS
GTPBP8
PYCARD
GSK3A
GSK3B
GSTP1
ZDHHC8
TFCP2L1
GZMB
HARS
HCLS1
ANXA6
HIVEP1
HLCS
HOXB9
DNAJA1
HSPA1A
HSPA1B
HSPA5
HSP90AB1
BRINP3
CA5BP1
IDH1
IFIT3
IRGM
MACC1
ANKRD37
ILF3
IREB2
ARAF
JARID2
YJEFN3
ERCC6L2
LRRC10
KCNJ8
KCNJ11
KRAS
ARMS2
GLYATL3
ACAT2
LIG1
FADS1
MIR17
MIR29A
MIR29B1
MIR29B2
MIR29C
MXD1
ARSB
MAPT
BLID
ME1
MECP2
MMP2
MOBP
PLIN5
MTHFD1
NCBP1
NFKB1
ACO1
NKTR
NMT1
NOS1
ATP2A1
NTSR1
AC004551.1
P2RY1
P4HA1
RRM2B
G0S2
NOX4
DCAF8
PCK1
SCCPDH
APH1A
C6orf203
CEND1
UCHL5
NOL7
HACD3
CWC15
PCF11
CYB5R1
WWOX
TMEM8B
PFDN2
PFDN4
PIN1
PKM
ATP7B
PON2
POR
DDIT4
POU5F1
NDFIP2
POU5F1B
XAF1
PPL
SLC35F6
C14orf119
ARGLU1
HEATR1
PPP2CA
PPP2R1A
FBXW7
PPP3CA
PPP3CC
PPP3R1
HJURP
PI4K2A
PPP6C
GDF5OS
ENOSF1
VPS35
DHX32
PRKCE
AL049834.1
PECR
PSENEN
MAPK1
MAPK3
MAPK8
MAPK9
MAPK10
MAP2K1
MAP2K2
GSDMC
KLK6
ASAH2
TRIM39
ENY2
PAK5
SMURF1
PTEN
DHFRP1
ABHD6
MTUS1
POLD4
PTPN11
PTS
NGB
CREBZF
BCAT1
RAD51C
RANBP2
RAP1GDS1
RGS2
RMRP
C12orf10
BDNF
MAPK12
PERP
NOD2
NOC3L
C15orf62
HS1BP3
HIF3A
SGK1
ACBD3
CEP85
P2RY12
KLC2
NDRG4
NOL6
SLC8A1
SLC9A1
SLC22A4
SLIT3
CAPRIN2
TRAK2
SOX4
SRI
SREBF2
BRAF
STK11
STXBP1
BSG
ABCC8
TAT
TFAP2C
TFAP4
TFDP1
TFDP2
TGM2
TH
TNFRSF1A
TP53BP2
TP73
TRAF3
FAM72A
UBA1
UROS
VHL
TRPV1
XPC
XRCC3
YWHAB
YWHAE
YWHAG
YWHAH
YWHAZ
CFAP410
ZNF205
ZNF217
SECISBP2
DCTPP1
HAUS3
LRRK1
FAM124B
TUSC3
HKDC1
WDR26
DNAJC5
IQCN
CAMK2A
ACSBG2
MAP1LC3B
PNPLA4
CAPN1
CASP2
CCM2
ZMIZ2
PARP9
SESN2
CASP4
PLA2G6
USP48
RHBDD1
BBOX1
TCHP
APOPT1
TNRC18
DGAT2
LIPF
LGALS12
AGPS
DEGS1
TP63
DYNLL1
S1PR4
URI1
GBF1
RIPK1
HRK
NAPG
KYAT1
CCN6
SQSTM1
CPNE3
RAB29
KYNU
MAATS1
AC074143.1
HAP1
HIP1R
FAM110B
STPG1
FIBP
MYOM2
DDX21
GLYATL1
TSPOAP1
GTF3C4
MYL10
AIM2
SH3BP5
BAG5
PTGES
ABCG1
NOS1AP
ATG13
DLGAP5
USP15
CASP8AP2
ATG14
ZFYVE1
MBOAT7
CANX
ATG5

## Sheet: GO_geneset
Genesets	Genes
GO_INTRINSIC_COMPONENT_OF_MITOCHONDRIAL_OUTER_MEMBRANE	ABCB6	TOMM40	CPT1A	FUNDC1	DMPK	TOMM20L	FIS1	ARMCX3	GDAP1	RHOT1	SYNJ2BP	MFN1	BAK1	PINK1	FUNDC2	BNIP3	MUL1	MGARP	RHOT2	TOMM20	MFN2
GO_OUTER_MITOCHONDRIAL_MEMBRANE_PROTEIN_COMPLEX	TOMM6	TOMM40	MTX2	SAMM50	MTX3	TOMM20L	TOMM5	MTX1	TOMM7	ANKZF1	MFN1	DNAJC11	TOMM22	PINK1	TOMM40L	TOMM20	TOMM70
GO_MITOCHONDRIAL_MATRIX	TSFM	PPIF	LRPPRC	TRAP1	AASS	DHRS2	MRPS31	RIDA	GLYAT	BCKDK	WARS2	ACAA2	TIMM44	PITRM1	MRPL28	TXNRD2	MTHFS	FARS2	MTHFD2	CLPX	ME3	MRPS30	FASTK	PRDX3	ACOT2	HTD2	LIAS	HIBADH	MRPL3	POLG2	CA5B	FDX2	HOGA1	PARK7	MALSU1	ACSM1	TOP1MT	MRPL53	MRPL54	THEM4	CHCHD1	LRRK2	MRPL52	ISCA2	HYKK	ACSM2A	EARS2	MRPL10	NAXE
GO_MITOCHONDRIAL_MEMBRANE_PART	UQCRFS1P1	PET100	TOMM6	TIMM23	NDUFC2-KCTD14	ABCB6	TIMM23B	PPIF	COQ7	TIMM17B	MICU1	TIMM17A	TOMM40	ATP5PD	ATP5MG	MTX2	AFG3L2	IMMT	PARK7	LRRK2	COX6B2	MICOS13	NDUFA11	CNR1	DNAJC19	TAMM41	COX4I1	COX6A1	COX6A2	ATPSCKMT	GRPEL2	COX7A1	COX7A2	COX7A2P2	COX7B	SDHAF4	COX11	COX15	CPT1A	APOOL	FUNDC1	ROMO1	CYC1	COX7B2	DMPK	IMMP1L	MTLN	ETFDH	MICU2
GO_INNER_MITOCHONDRIAL_MEMBRANE_PROTEIN_COMPLEX	UQCRFS1P1	TIMM23	NDUFC2-KCTD14	TIMM23B	PPIF	TIMM17B	MICU1	TIMM17A	ATP5PD	ATP5MG	AFG3L2	IMMT	PARK7	MICOS13	NDUFA11	DNAJC19	COX4I1	COX6A1	COX6A2	GRPEL2	SDHAF4	APOOL	ROMO1	CYC1	IMMP1L	MICU2	TIMM10B	TIMM10	ATP5MGL	UQCRQ	TIMM21	DNAJC15	SLC25A6	UQCR10	TIMM22	NDUFS7	CHCHD10	ATP5F1EP2	UQCRHL	MICOS10	MT-ATP6	MT-ATP8	MT-CO1	MT-CYB	MT-ND1	MT-ND2	MT-ND3	MT-ND4	MT-ND4L
GO_MITOCHONDRIAL_PART	UQCRFS1P1	KIF28P	PET100	PLA2G4B	BCL2L10	BCL2L11	TOMM6	CMC4	TIMM23	CEBPZOS	NDUFC2-KCTD14	ABCB6	DNM1L	ABCF2	COX17	TIMM23B	TSFM	PPIF	LRPPRC	TRAP1	AASS	SLC25A13	SLC25A15	DHRS2	COQ7	MRPS31	TIMM17B	RIDA	GLYAT	BCKDK	WARS2	MICU1	PEMT	TIMM17A	ACAA2	TOMM40	HAX1	TIMM44	ATP5PD	VAT1	PITRM1	MRPL28	TXNRD2	MTHFS	TXNIP	ATP5MG	PRELID3A	MTX2	FARS2
GO_MITOCHONDRION	UQCRFS1P1	KIF28P	PET100	PLA2G4B	BCL2L10	BCL2L11	TOMM6	CMC4	GLYATL1B	TIMM23	PET117	MTRNR2L5	CEBPZOS	NDUFC2-KCTD14	ABCB6	DNM1L	ABCF2	COX17	TIMM23B	COL4A3BP	PYURF	TSFM	PPIF	LRPPRC	TRAP1	BCAP31	AASS	SLC25A13	SLC25A15	NME6	DHRS2	COQ7	MRPS31	TIMM17B	RIDA	GLYAT	AKAP8	GATD3B	BCKDK	EMC8	WARS2	MICU1	RACK1	PEMT	TIMM17A	ACAA2	TOMM40	ECI2	HAX1
GO_INTRINSIC_COMPONENT_OF_MITOCHONDRIAL_INNER_MEMBRANE	PET100	TIMM23	TIMM23B	TIMM17B	TIMM17A	AFG3L2	IMMT	MICOS13	COX11	APOOL	MTLN	ETFDH	PISD	MPC2	COQ2	COX18	COA3	MPC1L	CHCHD10	MICOS10	MT-CYB	OXA1L	COX16	MPC1	SLC25A3	CHCHD3	PPOX	MCUB	DNAJC11	COA1	AGK	SLC25A19	SCO1	MCUR1	SPG7	UQCC3	APOO	L2HGDH	TMEM177	CHCHD6	TMEM11	MCU	SMDT1	SFXN1	SCO2
GO_INTRINSIC_COMPONENT_OF_MITOCHONDRIAL_MEMBRANE	PET100	TIMM23	ABCB6	TIMM23B	TIMM17B	MICU1	TIMM17A	TOMM40	AFG3L2	IMMT	MICOS13	CNR1	COX11	CPT1A	APOOL	FUNDC1	DMPK	MTLN	ETFDH	ABCB10	PISD	MPC2	COQ2	COX18	COA3	SLC25A4	MPC1L	TOMM20L	CHCHD10	MICOS10	MT-CYB	OXA1L	FIS1	COX16	ARMCX3	MPC1	SLC25A3	GDAP1	CHCHD3	TMEM70	PPOX	MCUB	RHOT1	SYNJ2BP	MFN1	DNAJC11	COA1	AGK	MFF
GO_MITOCHONDRIAL_ENVELOPE	UQCRFS1P1	KIF28P	PET100	PLA2G4B	BCL2L10	BCL2L11	TOMM6	CMC4	TIMM23	CEBPZOS	NDUFC2-KCTD14	ABCB6	DNM1L	ABCF2	COX17	TIMM23B	PPIF	TRAP1	SLC25A13	SLC25A15	COQ7	MRPS31	TIMM17B	MICU1	PEMT	TIMM17A	TOMM40	HAX1	TIMM44	ATP5PD	VAT1	MRPL28	TXNIP	ATP5MG	PRELID3A	MTX2	MTCO2P12	YME1L1	CLPX	MRPS30	AFG3L2	TOMM34	UQCR11	RAB32	IMMT	SLC27A3	ABCB8	MRPL3	RDH13
GO_MITOCHONDRIAL_PROTEIN_COMPLEX	UQCRFS1P1	TOMM6	TIMM23	NDUFC2-KCTD14	TIMM23B	PPIF	MRPS31	TIMM17B	BCKDK	MICU1	TIMM17A	TOMM40	ATP5PD	MRPL28	ATP5MG	MTX2	CLPX	MRPS30	AFG3L2	IMMT	MRPL3	PARK7	MALSU1	MRPL53	MRPL54	CHCHD1	MRPL52	MRPL10	MICOS13	NDUFA11	MRPL55	MTERF4	DNAJC19	COX4I1	COX6A1	COX6A2	GRPEL2	SDHAF4	APOOL	ROMO1	CYC1	DBT	DLAT	DNA2	IMMP1L	MRPL21	MICU2	MRPS27	PMPCA
GO_MITOCHONDRIAL_PROTON_TRANSPORTING_ATP_SYNTHASE_COMPLEX_COUPLING_FACTOR_F_O_	ATP5PD	ATP5MG	ATP5MGL	MT-ATP8	ATP5PB	ATP5MC1	ATP5MC2	ATP5MC3	ATP5ME	ATP5PF	ATP5MF
GO_MITOCHONDRIAL_OUTER_MEMBRANE_TRANSLOCASE_COMPLEX	TOMM6	TOMM40	TOMM20L	TOMM5	TOMM7	TOMM22	PINK1	TOMM40L	TOMM20	TOMM70
GO_TIM23_MITOCHONDRIAL_IMPORT_INNER_MEMBRANE_TRANSLOCASE_COMPLEX	TIMM23	TIMM23B	TIMM17B	TIMM17A	DNAJC19	GRPEL2	ROMO1	TIMM10	TIMM21	DNAJC15	SLC25A6	PAM16	GRPEL1	TIMM50
GO_MITOCHONDRIAL_RESPIRATORY_CHAIN_COMPLEX_I	NDUFC2-KCTD14	PARK7	NDUFA11	NDUFS7	MT-ND1	MT-ND2	MT-ND3	MT-ND4	MT-ND4L	MT-ND5	NDUFA1	NDUFA2	NDUFA3	NDUFA4	NDUFA5	NDUFA6	NDUFA7	NDUFA8	NDUFA9	NDUFA10	NDUFAB1	NDUFB1	NDUFB2	NDUFB3	NDUFB4	NDUFB5	NDUFB6	NDUFB7	NDUFB8	NDUFB9	NDUFB10	NDUFC1	NDUFC2	NDUFS1	NDUFS2	NDUFS3	NDUFV1	NDUFS4	NDUFS5	NDUFS6	NDUFS8	NDUFV2	NDUFV3	NDUFA13	NDUFAF1	NDUFB11	DMAC2	FOXRED1	NDUFA12
GO_MITOCHONDRIAL_RESPIRATORY_CHAIN_COMPLEX_IV	COX4I1	COX6A1	COX6A2	MT-CO1	NDUFA4	NDUFA4L2	UQCRC2	UQCRFS1	C15orf48	COX4I2	COX5A
GO_MITOCHONDRIAL_ALPHA_KETOGLUTARATE_DEHYDROGENASE_COMPLEX	BCKDK	DBT	BCKDHA	BCKDHB	MRPS36
GO_MITOCHONDRIAL_CRISTA	COX6B2	ATPSCKMT	LYN	OPA1	STAR	SLC8B1
GO_MITOCHONDRIAL_TRICARBOXYLIC_ACID_CYCLE_ENZYME_COMPLEX	BCKDK	DBT	BCKDHA	BCKDHB	SUCLG2	MRPS36
GO_EXTRINSIC_COMPONENT_OF_MITOCHONDRIAL_INNER_MEMBRANE	COQ7	TAMM41	OPA1	COQ6	PAM16	COQ4	COQ3	COQ8A	DUSP21	NDUFAF5	COQ8B	NOA1	COQ5	ATP23
GO_MITOCHONDRIAL_INTERMEMBRANE_SPACE_PROTEIN_TRANSPORTER_COMPLEX	TIMM10B	TIMM13	TIMM10	TIMM9	TIMM8B
GO_TIM22_MITOCHONDRIAL_IMPORT_INNER_MEMBRANE_INSERTION_COMPLEX	TIMM10B	TIMM10	TIMM22	AGK	TIMM29
GO_MITOCHONDRIA_ASSOCIATED_ENDOPLASMIC_RETICULUM_MEMBRANE	RAB32	PDZD8	ACSL4	ATG14	RAB38	ZFYVE1	STX17	MBOAT7	CANX	SERAC1	FATE1	ATG5	TOMM20
[truncated: 1,522 more columns]

## Sheet: MitoCarta 3.0
Symbol
CYC1
SDHB
COQ7
SDHA
UQCRC1
COQ5
PDHA1
COQ9
MRPL12
ATP5F1D
COX5A
ISCA2
PMPCB
UQCRFS1
ATP5F1A
OGDH
PDHB
UQCRC2
SDHD
MRPS35
UQCRQ
MRPL53
DBT
PDK4
MDH2
MRPS27
CS
GRPEL1
DLAT
LRPPRC
DLST
PDHX
GFM1
MPC2
NDUFS1
MRPL46
ATP5F1E
SLC25A3
MRPS23
FH
PMPCA
ATP5F1B
SDHAF4
UQCR10
ISCA1
SUCLA2
COQ3
IARS2
MRPS15
IDH3A
COX11
ETFDH
TIMM10
MRPL34
MRPL2
BCKDHA
UQCRH
HIGD2A
ATP5PO
ECHS1
LETMD1
COX6A1
COX15
AFG3L2
HADHA
ETFA
NDUFS7
CPT2
BCKDHB
IDH3B
LARS2
ACADS
LETM1
ATP5ME
OPA1
AUH
SUCLG1
NDUFV2
COQ6
MRPL43
ABHD11
ATP5PF
NDUFB8
LONP1
DLD
AIFM1
ECHDC3
APOOL
MRPL10
MRRF
NDUFS8
ACADM
IMMT
TIMM9
SLC25A4
SAMM50
NDUFS2
NDUFV1
ACO2
SUPV3L1
FECH
MTIF2
PHB
HIBCH
MRPS2
HSPA9
SURF1
PRDX3
GHITM
GUF1
TIMM13
LYRM4
MRPL16
MRPL40
IDH3G
SDHC
NDUFB5
SDHAF2
COQ10A
GATD3A
TXN2
MRPS18A
COX6C
NDUFB9
MTCH2
NDUFA6
SLC25A20
MRPL1
TIMM44
COX17
MICOS10
SOD2
COX6B1
VDAC1
CLPP
HADH
ACADL
ACAT1
MALSU1
CLPX
NDUFS4
MRPL4
C1QBP
PITRM1
UQCC1
MRPL55
MRM1
MECR
MRPL44
HSDL2
MRPS14
ABCB8
ATPAF2
NDUFA9
COA6
POLRMT
ISCU
RTN4IP1
OGDHL
ATP5F1C
BCKDK
GFM2
NDUFAF4
SLC25A35
SLC25A11
TIMM8B
MCAT
IBA57
PHB2
DAP3
CMC2
SDHAF1
MRPS17
ADHFE1
NFS1
NDUFAF5
MRPL17
TACO1
MFN1
PPTC7
MRPL11
COX4I1
NDUFS6
MRPL13
OXCT1
COX5B
PDK2
ALAS1
MRPL33
MTO1
LIAS
NDUFA5
NDUFB6
MTX2
SUCLG2
FDX1
SLC25A1
MRPS28
TIMM50
VDAC2
SLC25A42
TOMM7
ECH1
GATB
BCS1L
ERAL1
CMC1
MRPL28
TSFM
FXN
NFU1
YARS2
MRPL21
ALDH4A1
TOMM40L
NDUFAF1
NDUFB10
ACADSB
MRPS9
COQ8A
ACADVL
COQ4
MRPL15
NDUFA2
MRPL24
HSPD1
NDUFS5
AK3
CYCS
MIPEP
LYRM7
CRAT
PCCB
MRPS7
MRPL3
PRODH
PCCA
MCCC1
MRPS12
CLPB
PDK1
MRPL49
COX7A2
TMEM126A
ECHDC2
HCCS
HIBADH
MRPL19
MRPL36
SLC25A30
BDH1
FARS2
ABCB7
MTX1
NDUFA7
TIMM17A
ALDH9A1
MRPS18C
MARS2
ALDH6A1
FDXR
GATC
TRAP1
ACAD8
ALDH2
PPIF
TIMM22
IVD
L2HGDH
ETHE1
MRPL20
SLC25A5
SLC25A12
MRPS21
TOMM22
ACAA2
MRPL30
DNAJA3
NDUFB2
MRPS34
ETFB
AFG1L
ATP5IF1
ATP5PB
COX7C
CHCHD3
COQ10B
ACSF3
POLDIP2
SLC25A10
SLC25A13
PDK3
ME3
MRPL22
IDH2
GCDH
MRPL47
PPA2
MRPL9
CHCHD10
WARS2
SLC25A19
CBR4
SMDT1
HAGH
COX7A1
MTG1
COX14
NDUFA12
MRPS16
MTERF2
ETFRF1
GPD2
NDUFA10
NDUFC2
SLIRP
MT-ATP6
MT-CO2
TIMM21
NDUFA8
GLS
NDUFB11
DHTKD1
FAHD2A
HSD17B8
HINT2
MRPS5
C6orf136
SPRYD4
LIPT2
DECR1
MRPS26
SLC25A15
NDUFV3
BPHL
STOML2
MSRB2
LACTB
TOMM40
SLC25A25
ADCK5
ACAD10
VWA8
CCDC90B
DNAJC11
ALKBH7
GLDC
MPC1L
THEM4
SSBP1
MRPL27
HSCB
MRPS10
AK4
ATAD3A
MRPL37
PTGES2
TXNRD2
ACSM5
CISD1
MRPL41
MTARC2
MRPS6
MRPL23
SQOR
SCO1
GCAT
MTHFD1L
ECI2
UQCRB
ATP5PD
ATP5MG
CCDC58
MCCC2
MCEE
MOCS1
MMUT
SLC25A51
SPG7
ATP5MC3
ATAD1
OXNAD1
MTG2
DARS2
MRPL51
PC
CLYBL
PNPLA8
MLYCD
PYURF
TIMM17B
MRPL32
SLC25A26
PRODH2
NIT2
FDX2
ME2
TUFM
COX6A2
SLC30A9
TAMM41
TIMM23
RMND1
MFN2
DNLZ
CHCHD4
NDUFAB1
ACSM1
COA5
COQ2
PDSS2
EHHADH
NDUFS3
ABCB10
CKMT2
MRPS25
ACAD9
COX16
FAM210A
ACOT13
CPT1A
DHRS4
PRELID2
CARS2
NIPSNAP2
NDUFB7
MICOS13
GLRX2
MRPS30
SCO2
HSD17B10
NARS2
RPUSD3
SUOX
SARDH
RIDA
COX8A
SPR
MPV17
ZADH2
MRPL18
ALDH1B1
CHCHD1
TIMM8A
VDAC3
SLC25A24
MPC1
SLC25A22
SLC25A31
SLC25A18
TRNT1
IDE
GSTK1
VARS2
HSPE1
MRPL54
MRPL38
MRPL58
MTCH1
TRIAP1
PTCD3
COX10
AKAP1
MRM3
AK2
TMEM70
NOA1
MCUR1
TMEM14C
NDUFC1
MRPL35
NDUFA3
PDSS1
SLC25A16
FMC1
ACSM3
NDUFAF6
UCP1
SFXN1
GLRX5
PTRH1
MRPS11
XPNPEP3
PDP1
ECI1
SLC25A21
SLC25A29
SLC25A45
SDHAF3
PRELID3B
SLC25A39
NDUFB3
REXO2
GATM
TIMM10B
SARS2
CHDH
MRPL57
C8orf82
EARS2
GRHPR
MTFMT
PTCD2
ECHDC1
HARS2
NDUFA4
NDUFA13
NAXE
TMEM11
SELENOO
NAGS
HSD17B4
NDUFAF7
OAT
MRPL50
COX7B
RARS2
OXLD1
LACTB2
NDUFA11
AURKAIP1
CHCHD7
SHMT2
MTHFD2
RMDN1
CPS1
MRPL14
MTRES1
RDH13
TRMT2B
MRPS24
COA3
GSR
ENDOG
BCAT2
TEFM
ACSF2
TRMU
MRPS22
LAP3
GLUD1
HMGCL
FHIT
MRPS33
NUBPL
LYRM2
MPV17L
GADD45GIP1
TFAM
ALDH18A1
OXSM
KYAT3
TARS2
TBRG4
TMEM65
ROMO1
PRDX5
DNAJC15
MAIP1
HIGD1A
C16orf91
RHOT2
SLC25A44
HAO2
OXA1L
SLC25A46
RDH14
ATP5MPL
CA5B
COASY
CISD3
GSTZ1
COX6B2
GLOD4
ACAA1
CROT
PDF
COX19
AMT
PDPR
NLN
BOLA1
ALAS2
GRPEL2
ALDH7A1
HDHD5
GFER
IMMP2L
COX4I2
MRPL39
AADAT
FUNDC2
LYPLA1
PDHA2
MTRF1L
GTPBP3
MTHFD2L
YME1L1
ACOT2
COA8
MMAB
PPOX
ABCD3
SIRT3
LDHD
MRPL45
C12orf65
IMMP1L
POLG
ATPAF1
BLOC1S1
ALDH1L2
COX18
CPOX
NNT
NDUFAF8
ATP23
DCAKD
ATP5MF
SFXN3
AASS
DIABLO
COX8C
PXMP2
AGXT2
GLS2
APOO
ACAD11
C5orf63
HOGA1
TTC19
NGRN
TCAIM
GCSH
SIRT5
GPT2
TOMM6
FAM162A
ABCB6
MACROD1
TST
MT-CO1
MTFR1L
SDR39U1
DMGDH
SLC25A14
PRELID3A
CHCHD5
TOMM70
NIT1
FAHD1
MCU
CYP27A1
MT-ND2
MT-ND4
MT-ND5
DELE1
FASTKD1
MRPS31
ALDH1L1
PTCD1
HADHB
TRIT1
CRLS1
GLYCTK
SLC25A32
AARS2
EXOG
CHCHD2
KMO
SFXN5
ELAC2
GPX1
CPT1B
FIS1
PRELID1
UCP3
SLC25A27
SLC25A40
SLC25A23
HEMK1
SLC25A36
OMA1
LETM2
DHRS1
STOM
METTL5
MSRA
NUDT8
NMNAT3
SLC25A38
MPV17L2
ACLY
ABCD2
FLAD1
LIPT1
DGLUCY
PCK2
NADK2
MPST
NUDT13
ACACA
ABAT
HMGCS2
ALDH5A1
CKMT1A
PISD
NDUFB4
UQCR11
FAM136A
TOMM5
HTRA2
NDUFA1
MT-CYB
GUK1
D2HGDH
OPA3
AKR1B10
PHYH
NDUFAF2
ECSIT
PARL
MRPL42
DNAJC4
PAM16
ALDH3A2
ACSL6
MRS2
ABHD10
HINT3
PXMP4
OSGEPL1
NUDT2
CYB5B
GRSF1
MRPS18B
DNAJC30
CAT
DGUOK
ACOT9
ACSS1
RFK
STARD7
CHPT1
MT-ATP8
TIMMDC1
SPATA19
HTATIP2
AKR7A2
DUT
MT-CO3
DHRS7B
MTRF1
TMEM143
NT5M
RHOT1
NME4
MTHFS
TIMM29
PNPO
MICU2
PCBD2
QRSL1
ADCK1
PRDX6
NIPSNAP1
GARS1
ACSM2A
SLC25A33
LYRM9
RAB24
PARS2
MRPL52
PUS1
GOT2
NAXD
MT-ND3
ACCS
PTRH2
PGS1
OXR1
LYPLAL1
DNAJC28
FPGS
TMEM205
SLC25A53
AIFM3
MGST1
MTFP1
COA4
NIF3L1
PUSL1
SDSL
BAX
MAVS
METTL17
ACACB
ARG2
MTPAP
CCDC51
SUGCT
DNM1L
NRDC
TMEM126B
NSUN4
ACSS3
FAM210B
RBFA
METAP1D
AHCYL1
NIPSNAP3A
MTARC1
FUNDC1
ACSL1
COX20
HSDL1
CBR3
MTERF4
NUDT19
HEBP1
PTPMT1
PGAM5
DTYMK
KARS1
STAR
DNAJC19
OTC
COX7A2L
MTERF3
SFXN2
FASN
PINK1
TMEM177
TXNRD1
THNSL1
FDPS
IDI1
TOP3A
FTMT
LDHAL6B
MTFR1
BCL2L13
TRMT10C
ACOT7
TFB1M
ARF5
MCUB
TWNK
MMADHC
PYCR2
TSTD1
LYRM1
OSBPL1A
RECQL4
PET100
GDAP1
MTIF3
UNG
GLYAT
ISOC2
ATP5MC1
QDPR
COQ8B
GTPBP10
TSPO
FTH1
TRMT1
ADCK2
TSTD3
MRPS36
PDP2
AGPAT5
MCRIP2
UCP2
SLC25A37
SLC25A28
SLC25A48
SLC25A43
SLC25A47
SLC25A41
SLC25A34
EPHX2
NUDT5
MICU1
SOD1
SERHL2
NDUFAF3
BOLA3
OCIAD2
RSAD1
CHCHD6
FASTKD2
PEX11B
TMEM186
PIF1
FABP1
ABCD1
PLPBP
DBI
PNPT1
TOP1MT
RNASEH1
ABCA9
SCP2
NT5DC3
CMC4
LDHB
YBEY
HINT1
MUL1
TK2
AGMAT
CMPK2
BID
ARL2
SYNJ2BP
MFF
DCXR
NUDT9
AMACR
VPS13D
NUDT6
DMAC2
MRM2
BAK1
DHODH
MAOB
MGST3
ACP6
MRPL48
AGXT
CYB5R3
DDX28
PNKD
MICU3
BNIP3
MTX3
MUTYH
GTPBP6
CYP11A1
OCIAD1
METTL8
SMIM20
RPUSD4
SMIM8
NME6
FKBP8
ACSM4
NLRX1
FOXRED1
TFB2M
PPM1K
ATP5MC2
MT-ND1
TAZ
MSRB3
ACOT11
NIPSNAP3B
NTHL1
MARCHF5
SFXN4
TRMT5
SLC25A6
SLC25A52
OGG1
ACOD1
QTRT1
AIFM2
PRDX2
FBXL4
GPAM
DMAC2L
RMDN3
PRXL2A
ATP5MD
PET117
MAOA
C15orf61
POLQ
BCO2
IFI27
CRYZ
PYCR1
TMLHE
TOMM20
YRDC
COA7
DHRS2
MMAA
MIEF1
C15orf48
LIG3
BNIP3L
FASTKD5
PARK7
COA1
COX7B2
MT-ND4L
SIRT4
UQCC2
USP30
PDE12
NME3
DHX30
FASTK
METTL15
CYP24A1
NOCT
PANK2
CA5A
NT5DC2
ATAD3B
TRUB2
PRKACA
COMTD1
CPT1C
C3orf33
MIGA2
SND1
GLUD2
HPDL
ANGEL2
ANTKMT
UQCC3
PRDX4
CDK5RAP1
PAICS
MGARP
HDHD3
CYP11B2
AGPAT4
RCC1L
FAM185A
PMAIP1
TDRKH
SLC8B1
CYP27B1
POLG2
THEM5
BIK
MTERF1
MTFR2
GPX4
TOMM20L
COMT
MYG1
SPATA20
OXCT2
CCDC127
CRY1
ACSM2B
MYO19
MGME1
SEPTIN4
EFHD1
RAB5IF
APEX1
SPTLC2
DMAC1
ATPSCKMT
NEU4
CASP9
AGK
MCL1
DUS2
PLD6
TOMM34
PRORP
PLSCR3
CKMT1B
NDUFB1
ATP5MF-PTCD1
CASP8
BCL2L1
EXD2
ARMC10
MIEF2
THG1L
GOLPH3
PREPL
FASTKD3
CEP89
GPAT2
NBR1
BOK
FKBP10
SETD9
CYP11B1
CSKMT
MIGA1
RPIA
BBC3
BAD
BCL2
BCL2A1
BCL2L2
CASP3
DMPK
DNA2
MT-ND6
PRKN
ALKBH1
PICK1
BCL2L10
AKAP10
STYXL1
NSUN2
ADCY10
SPHK2
NSUN3
PABPC5
PRSS35
PRIMPOL
SERAC1
STX17
TRMT61B
PDE2A
PLGRKT
ETFBKMT
RTL10
BCL2L11
SPIRE1
C2orf69
ARMCX2
ARMCX1
POLB
SNAP29
ARMCX3
ARMCX6
METTL4
SPHKAP
NAT8L
MCCD1
PIGBOS1
HTD2
RP11_469A15.2
