# Supplementary material for: Identification of mitochondria-related genes associated with anesthetics in patients undergoing off-pump coronary artery bypass grafting surgery
Source: Front Surg. 2025 Jul 9;12:1515732. doi: 10.3389/fsurg.2025.1515732 (PMC12283725; doi:10.3389/fsurg.2025.1515732)
Supplement: Supplementary Table S2 — Differentially expressed genes. [file Table2.xlsx]

## Sheet: S-post vs S-pre
gene	logFC	AveExpr	t	P.Value	adj.P.Val	B	Sig
MAFF	5.02054	9.82646	23.1148	2.07158e-15	4.73977e-11	24.2899	Up
CSRNP1	4.84761	8.15717	21.686	6.70339e-15	6.03326e-11	23.339	Up
ZFP36	4.25051	10.844	21.4912	7.91074e-15	6.03326e-11	23.2027	Up
CDKN1A	3.94336	10.2003	21.0033	1.20524e-14	6.89399e-11	22.8542	Up
SOCS3	2.33215	5.37969	20.1201	2.64382e-14	1.20981e-10	22.1954	Up
IL6	10.1599	7.37411	19.3741	5.26301e-14	2.00696e-10	21.6093	Up
FOSB	8.51065	7.96312	18.6749	1.02602e-13	3.35361e-10	21.0337	Up
SERTAD1	3.02541	10.2312	18.3244	1.446e-13	4.13555e-10	20.7351	Up
NR4A3	4.98879	6.2535	17.9009	2.20643e-13	5.60924e-10	20.365	Up
SIK1	2.86825	5.57443	17.2041	4.5109e-13	1.03209e-09	19.7327	Up
SELE	7.5068	6.72794	16.7622	7.19446e-13	1.49645e-09	19.3161	Up
RND1	5.95855	5.48956	16.2377	1.27017e-12	2.42179e-09	18.8048	Up
MYRF	-1.40174	3.35046	-16.1451	1.40667e-12	2.47573e-09	18.7126	Down
ARID5A	2.71346	7.38775	15.2122	4.04851e-12	6.61642e-09	17.7497	Up
GADD45B	3.10686	9.62571	14.7021	7.38928e-12	1.12711e-08	17.1958	Up
CEBPD	3.49285	8.30219	14.5096	9.31637e-12	1.26412e-08	16.9814	Up
MSLN	-5.03679	6.0852	-14.5028	9.39252e-12	1.26412e-08	16.9738	Down
C21orf62	-2.78974	4.24456	-14.2321	1.30701e-11	1.66135e-08	16.6671	Down
BTG2	3.05904	7.89035	14.1056	1.52797e-11	1.84e-08	16.5217	Up
JUNB	4.45223	7.99333	14.054	1.62897e-11	1.86355e-08	16.462	Up
CH25H	5.95224	6.94262	13.8254	2.16857e-11	2.36271e-08	16.1948	Up
LINC01133	-1.99293	4.27943	-13.7302	2.44571e-11	2.54354e-08	16.0823	Down
PRR15	-3.40377	4.94418	-13.1557	5.13136e-11	5.10458e-08	15.3857	Down
MYC	4.1732	9.29223	12.9794	6.47543e-11	6.17324e-08	15.166	Up
PRR15L	-3.5213	4.0554	-12.9216	6.99202e-11	6.39909e-08	15.0934	Down
EFNB3	-1.75868	3.93495	-12.8915	7.2787e-11	6.40526e-08	15.0553	Down
ATF3	2.60556	4.99269	12.7045	9.35491e-11	7.92742e-08	14.8175	Up
NR4A1	2.02266	5.33794	12.3971	1.42242e-10	1.12652e-07	14.4191	Up
DFNA5	-1.69546	9.27046	-12.3876	1.44113e-10	1.12652e-07	14.4067	Down
SBSPON	-3.53762	5.63434	-12.3289	1.5626e-10	1.12652e-07	14.3296	Down
SLC7A5	3.87147	7.508	12.2614	1.71595e-10	1.18972e-07	14.2403	Up
EGR1	3.8157	9.81195	12.209	1.84562e-10	1.24199e-07	14.1708	Up
KCNT2	-2.77559	6.74536	-12.0255	2.38668e-10	1.5602e-07	13.9251	Down
BRE-AS1	6.18588	5.86233	11.9832	2.5337e-10	1.61031e-07	13.868	Up
CLDN15	-2.13145	4.39262	-11.9356	2.71045e-10	1.64578e-07	13.8034	Down
SLC25A25	2.72445	8.14053	11.9296	2.73338e-10	1.64578e-07	13.7953	Up
CCL2	5.82235	10.7425	11.9084	2.8168e-10	1.65252e-07	13.7665	Up
NR4A2	5.30553	7.82731	11.8646	2.99814e-10	1.6756e-07	13.7068	Up
TAC1	5.33428	5.76731	11.855	3.0393e-10	1.6756e-07	13.6937	Up
LRP2	-2.51434	5.23215	-11.8466	3.07585e-10	1.6756e-07	13.6822	Down
DUSP5	4.46425	7.26315	11.8235	3.17922e-10	1.69164e-07	13.6506	Up
C11orf96	3.82976	12.3954	11.7823	3.37193e-10	1.7534e-07	13.5941	Up
PLLP	-3.70738	7.29261	-11.4143	5.74869e-10	2.88633e-07	13.0813	Down
C19orf33	-3.33591	6.16857	-11.4079	5.80294e-10	2.88633e-07	13.0723	Down
GPRC5A	3.44147	6.41332	11.2923	6.88089e-10	3.34968e-07	12.9081	Up
BNC2	-1.70871	5.17655	-11.2705	7.10693e-10	3.38764e-07	12.8769	Down
SPIDR	1.22814	5.44579	11.0083	1.05162e-09	4.91042e-07	12.4984	Up
FOSL1	3.5835	4.86043	10.9801	1.09737e-09	5.02157e-07	12.4572	Up
KLK11	-3.68744	6.20539	-10.9515	1.14588e-09	5.13579e-07	12.4153	Down
ITPKC	2.52208	7.55192	10.9393	1.16722e-09	5.13579e-07	12.3975	Up
KRT19	-3.60778	5.41033	-10.8054	1.431e-09	6.17762e-07	12.2001	Down
BNC1	-3.20864	6.19496	-10.7818	1.48369e-09	6.19881e-07	12.1651	Down
RAB27B	-1.51616	3.96393	-10.7702	1.51015e-09	6.19881e-07	12.1479	Down
PNP	4.98505	8.67521	10.7672	1.51719e-09	6.19881e-07	12.1434	Up
CBLN2	-3.39909	4.37623	-10.5987	1.96719e-09	7.89637e-07	11.8914	Down
LIF	5.57177	6.3786	10.5737	2.04498e-09	8.06709e-07	11.8537	Up
HSD17B6	-5.29258	5.80122	-10.4767	2.37892e-09	9.22538e-07	11.7067	Down
VMP1	5.71823	7.01772	10.4136	2.62581e-09	1.00131e-06	11.6106	Up
THAP2	2.13502	4.9747	10.3833	2.75403e-09	1.03299e-06	11.5642	Up
NXT1	1.85798	7.72606	10.3546	2.8815e-09	1.06337e-06	11.5202	Up
ST3GAL5	-2.11104	8.01404	-10.3339	2.97723e-09	1.08125e-06	11.4884	Down
GPR4	1.26515	3.93589	10.3222	3.03275e-09	1.08421e-06	11.4704	Up
DUSP2	3.77004	6.9997	10.2317	3.5006e-09	1.23221e-06	11.3306	Up
IL18	-3.5346	5.96845	-10.2128	3.6074e-09	1.25056e-06	11.3013	Down
HBEGF	1.64317	5.765	10.1959	3.70551e-09	1.2654e-06	11.2751	Up
FLRT3	-3.30532	7.50846	-10.1427	4.0343e-09	1.32502e-06	11.1922	Down
C12orf75	-2.80587	4.6963	-10.1419	4.03954e-09	1.32502e-06	11.191	Down
UPK3B	-3.51715	6.67665	-10.1318	4.10491e-09	1.32502e-06	11.1753	Down
NFIL3	2.54993	11.7263	10.1308	4.11173e-09	1.32502e-06	11.1737	Up
XIRP1	2.72558	12.9879	10.0731	4.51061e-09	1.41905e-06	11.0833	Up
SLC2A14	4.7283	6.44649	10.0636	4.58028e-09	1.41905e-06	11.0684	Up
LRRC1	-1.00332	5.17193	-10.0579	4.62263e-09	1.41905e-06	11.0594	Down
SLC2A3	3.95353	7.8557	10.0457	4.71364e-09	1.41905e-06	11.0404	Up
ZNF331	1.86457	9.08188	9.98999	5.15741e-09	1.53249e-06	10.9525	Up
CXCL2	2.87275	5.33923	9.97951	5.24559e-09	1.53793e-06	10.9359	Up
LPAR5	-1.46864	3.62719	-9.97196	5.31015e-09	1.53793e-06	10.924	Down
EGR3	6.37824	8.51986	9.96337	5.38451e-09	1.53997e-06	10.9104	Up
SLC9A3R1	-2.09293	6.70807	-9.93192	5.66625e-09	1.60054e-06	10.8606	Down
SPSB1	3.44729	7.45775	9.9151	5.82321e-09	1.62482e-06	10.8339	Up
SOX17	2.18647	5.62395	9.90061	5.9621e-09	1.64353e-06	10.8108	Up
ITPRIP	1.42295	6.61843	9.88781	6.08767e-09	1.65817e-06	10.7904	Up
RGS2	2.38815	12.8105	9.8398	6.58358e-09	1.77214e-06	10.7139	Up
CCDC64	-1.14913	4.71128	-9.79609	7.07182e-09	1.88143e-06	10.6439	Down
BCHE	-2.09126	10.8633	-9.77369	7.33644e-09	1.9294e-06	10.6079	Down
RARRES3	-1.98941	7.86177	-9.74768	7.65676e-09	1.99076e-06	10.5661	Down
HAS2	5.00547	7.59928	9.68049	8.55361e-09	2.19895e-06	10.4576	Up
MIR21	3.14351	9.17749	9.66157	8.8255e-09	2.24364e-06	10.427	Up
LIMS3	1.6282	6.61039	9.62188	9.42546e-09	2.36983e-06	10.3625	Up
CA12	-1.53091	4.70113	-9.59705	9.82225e-09	2.38763e-06	10.3221	Down
DPP4	-2.738	5.90457	-9.59394	9.87317e-09	2.38763e-06	10.3171	Down
FOSL2	2.06005	6.0263	9.59111	9.91963e-09	2.38763e-06	10.3125	Up
TNFRSF10D	1.32167	4.97584	9.58518	1.0018e-08	2.38763e-06	10.3028	Up
APOLD1	2.08724	10.8146	9.57873	1.01261e-08	2.3885e-06	10.2923	Up
DISP1	-2.15225	6.07282	-9.49261	1.16918e-08	2.7021e-06	10.1513	Down
TGM1	-3.30618	4.82533	-9.46099	1.23282e-08	2.82069e-06	10.0993	Down
AREG	2.19629	4.985	9.38903	1.39148e-08	3.12128e-06	9.98045	Up
LOC285556	7.43716	8.40157	9.37558	1.42342e-08	3.16192e-06	9.95817	Up
ICAM1	3.66963	6.51154	9.35376	1.47688e-08	3.23998e-06	9.92196	Up
FOS	6.92734	7.91342	9.34679	1.49439e-08	3.23998e-06	9.91038	Up
TNFAIP3	3.60819	8.97081	9.34417	1.50104e-08	3.23998e-06	9.90603	Up
PTX3	7.37944	8.61289	9.33854	1.5154e-08	3.24041e-06	9.89667	Up
ANXA8	-2.62816	5.4172	-9.33116	1.53447e-08	3.25081e-06	9.88439	Down
GPR183	2.765	8.6386	9.31948	1.56515e-08	3.28537e-06	9.86495	Up
HP	-3.62573	12.0586	-9.2846	1.66057e-08	3.42934e-06	9.8068	Down
IL1RN	1.46424	3.33888	9.28349	1.66371e-08	3.42934e-06	9.80495	Up
EGR2	4.77737	9.51134	9.25406	1.74912e-08	3.56991e-06	9.75574	Up
AADAC	-4.51758	7.09026	-9.24939	1.76311e-08	3.56991e-06	9.74792	Down
SLPI	-5.5442	8.96772	-9.22622	1.83414e-08	3.68116e-06	9.70909	Down
LRRN4	-3.453	3.90927	-9.19502	1.93455e-08	3.82698e-06	9.65669	Down
CHD1	2.02093	8.92196	9.1933	1.94025e-08	3.82698e-06	9.65379	Up
CXCL1	5.55575	7.67601	9.12172	2.19362e-08	4.24828e-06	9.53307	Up
IER3	2.71754	12.4314	8.98748	2.76603e-08	5.27391e-06	9.30484	Up
MST1	-2.78801	5.86815	-8.98079	2.79834e-08	5.29141e-06	9.2934	Down
NSG1	-1.90689	7.4921	-8.95623	2.92037e-08	5.43236e-06	9.25136	Down
PTPRF	-1.04486	4.59751	-8.94836	2.96059e-08	5.46276e-06	9.23789	Down
PKHD1L1	-2.89367	7.67415	-8.92648	3.07561e-08	5.62959e-06	9.20034	Down
SELENBP1	-1.59048	9.80741	-8.85937	3.45825e-08	6.27974e-06	9.08478	Down
C3	-2.62974	12.8429	-8.81363	3.74713e-08	6.75074e-06	9.00568	Down
FANCF	-1.58296	5.60336	-8.75873	4.12742e-08	7.37776e-06	8.91035	Down
NINL	-1.69504	6.20124	-8.69704	4.60301e-08	8.14783e-06	8.80274	Down
PIM1	2.64702	9.15555	8.69381	4.62945e-08	8.14783e-06	8.79709	Up
ADAMTS9	1.77694	4.49089	8.66157	4.90199e-08	8.56164e-06	8.74063	Up
SLC28A3	-1.98305	4.16292	-8.64996	5.00413e-08	8.67382e-06	8.72027	Down
THBS1	3.25909	5.31958	8.62936	5.19096e-08	8.93001e-06	8.68409	Up
RGS1	2.88309	4.52058	8.61977	5.28033e-08	9.01597e-06	8.66723	Up
TNFAIP6	6.36548	8.17616	8.59726	5.49659e-08	9.31569e-06	8.6276	Up
ABRA	2.48825	9.4776	8.5893	5.57527e-08	9.34054e-06	8.61356	Up
IRF1	2.87139	8.42598	8.58753	5.59289e-08	9.34054e-06	8.61044	Up
SLC19A2	2.54482	10.9017	8.58207	5.64763e-08	9.36361e-06	8.60082	Up
CPA4	-3.92471	4.52797	-8.55391	5.93935e-08	9.77191e-06	8.55108	Down
ADAMTS1	3.32221	9.74792	8.55016	5.97932e-08	9.77191e-06	8.54445	Up
UPK1B	-5.69419	7.40391	-8.48238	6.75287e-08	1.09578e-05	8.42425	Down
BLNK	-2.55102	4.28507	-8.45953	7.0364e-08	1.13342e-05	8.3836	Down
RAB15	3.30525	7.51478	8.4558	7.08386e-08	1.13342e-05	8.37695	Up
CCNL1	1.34288	5.80098	8.43722	7.32532e-08	1.16391e-05	8.34382	Up
JUN	1.48646	8.73362	8.42227	7.52579e-08	1.18752e-05	8.31713	Up
GPM6A	-2.03666	7.19611	-8.39967	7.83976e-08	1.22859e-05	8.27672	Down
TNFRSF12A	3.40882	9.64094	8.38355	8.07196e-08	1.25637e-05	8.24786	Up
CXCL8	5.95222	6.75901	8.35582	8.48827e-08	1.30343e-05	8.19812	Up
LOC100996760	-2.92646	5.13635	-8.29524	9.47717e-08	1.44559e-05	8.08911	Down
BCL3	1.06775	4.54946	8.27927	9.75749e-08	1.47849e-05	8.06027	Up
THBD	3.34009	8.20546	8.25162	1.0263e-07	1.54485e-05	8.01028	Up
SERPINE1	3.17566	5.48192	8.13549	1.27029e-07	1.88734e-05	7.79913	Up
FBXL2	-1.0202	6.08643	-8.13547	1.27032e-07	1.88734e-05	7.7991	Down
PTGS2	5.66893	7.0888	8.12657	1.29135e-07	1.90621e-05	7.78284	Up
CYR61	4.45991	9.82654	8.11421	1.32115e-07	1.92547e-05	7.76025	Up
OTUD1	1.49941	6.31197	8.11418	1.32123e-07	1.92547e-05	7.76018	Up
STC1	3.30253	6.23533	8.05983	1.46103e-07	2.11572e-05	7.66055	Up
CD274	1.08341	7.05166	8.01686	1.58238e-07	2.2351e-05	7.58149	Up
REEP1	-1.17249	10.802	-8.01353	1.5922e-07	2.2351e-05	7.57536	Down
GEM	3.03505	11.4919	8.01349	1.59231e-07	2.2351e-05	7.57529	Up
CREM	1.64115	7.27363	8.00541	1.61643e-07	2.25511e-05	7.56039	Up
NAMPT	3.4291	9.39926	8.00097	1.62985e-07	2.26005e-05	7.5522	Up
PHGDH	-1.96209	8.19079	-7.99228	1.65644e-07	2.28309e-05	7.53616	Down
PRG4	-6.54942	8.05933	-7.96317	1.74885e-07	2.39604e-05	7.48235	Down
GRHL1	1.76715	4.02933	7.8961	1.98272e-07	2.70028e-05	7.35791	Up
AQP1	-1.63588	10.2461	-7.88335	2.03072e-07	2.74928e-05	7.33419	Down
LOC100288911	-1.49184	4.76664	-7.85784	2.13043e-07	2.85982e-05	7.28665	Down
B3GNT5	1.19434	3.83577	7.85353	2.14776e-07	2.85982e-05	7.27862	Up
ALOX15	-3.43469	5.478	-7.82	2.28781e-07	3.02573e-05	7.21595	Down
RND3	2.29238	11.3551	7.78513	2.44347e-07	3.19466e-05	7.15065	Up
CRISPLD2	1.30788	6.40538	7.72844	2.72046e-07	3.47733e-05	7.04409	Up
LOC100130705	4.70393	4.9144	7.70499	2.8444e-07	3.61555e-05	6.99988	Up
HES4	1.19805	5.65657	7.68675	2.94486e-07	3.72256e-05	6.96543	Up
TIPARP	1.66674	11.8582	7.65195	3.14681e-07	3.95599e-05	6.89958	Up
CXCL3	4.51736	7.7707	7.63565	3.24627e-07	4.05872e-05	6.86868	Up
LOC100996792	1.31795	8.36712	7.5934	3.51959e-07	4.37607e-05	6.78841	Up
CSF3	2.14403	5.61677	7.59062	3.53835e-07	4.37607e-05	6.78313	Up
KLF4	2.50641	8.3806	7.51558	4.08717e-07	5.00078e-05	6.63991	Up
SPHK1	3.83326	6.3394	7.50263	4.19045e-07	5.07289e-05	6.61512	Up
SYT4	-4.7381	8.62776	-7.48707	4.31817e-07	5.17276e-05	6.5853	Down
PXDC1	1.03222	8.0906	7.46962	4.46625e-07	5.32228e-05	6.5518	Up
TFPI2	3.26388	7.74269	7.46662	4.49222e-07	5.32549e-05	6.54603	Up
PROCR	-2.06844	9.47538	-7.45509	4.59352e-07	5.41751e-05	6.52388	Down
IL1RL1	3.55727	4.2759	7.39204	5.19083e-07	6.0595e-05	6.40239	Up
MIR22	1.74797	12.1597	7.3835	5.27772e-07	6.12966e-05	6.38589	Up
AMMECR1	-1.0338	4.02301	-7.37473	5.3685e-07	6.2036e-05	6.36894	Down
CGN	-2.82754	3.98689	-7.35343	5.59588e-07	6.43386e-05	6.3277	Down
RBM4B	-1.07682	6.93992	-7.29464	6.2764e-07	7.0741e-05	6.21361	Down
CALCA	1.3188	3.24975	7.29162	6.31371e-07	7.08126e-05	6.20771	Up
SGMS2	2.77045	7.98173	7.24894	6.86447e-07	7.6119e-05	6.12455	Up
PTGS1	-1.57128	7.56441	-7.2451	6.91632e-07	7.6119e-05	6.11707	Down
WDR54	-1.20046	7.05003	-7.22662	7.17211e-07	7.81419e-05	6.08095	Down
PPRC1	2.0576	8.10452	7.21695	7.3097e-07	7.92635e-05	6.06205	Up
LOC102724356	-1.77263	5.23613	-7.20394	7.49924e-07	8.09352e-05	6.03659	Down
SMTNL2	-1.81982	6.58345	-7.1956	7.6234e-07	8.18889e-05	6.02026	Down
DNAJB1	1.7468	9.40325	7.19204	7.67712e-07	8.20806e-05	6.01328	Up
ITGA5	1.87201	8.14629	7.17931	7.87218e-07	8.33868e-05	5.98832	Up
TRAF5	-1.16009	3.95098	-7.1676	8.05611e-07	8.49419e-05	5.96535	Down
ZBTB21	2.06401	8.77378	7.16146	8.15439e-07	8.55837e-05	5.95328	Up
RP11-373D23.2	2.73312	4.89188	7.13848	8.53323e-07	8.87456e-05	5.90811	Up
ELL2	1.55372	6.28631	7.11437	8.95022e-07	9.22437e-05	5.86065	Up
HOXB2	-2.06656	4.8467	-7.08096	9.56338e-07	9.80597e-05	5.79472	Down
MAL2	-2.27529	8.30632	-7.07409	9.69468e-07	9.85841e-05	5.78115	Down
TMEM37	-1.22478	5.37183	-7.06653	9.84133e-07	9.96292e-05	5.76621	Down
REL	1.60174	5.64182	7.06353	9.90031e-07	9.96292e-05	5.76027	Up
NFKBIZ	1.61645	10.3889	7.05992	9.97163e-07	9.96292e-05	5.75312	Up
DSC3	-1.61914	3.53994	-7.04025	1.03694e-06	0.000103153	5.7142	Down
MT2A	1.70174	12.1572	7.03784	1.04193e-06	0.000103201	5.70942	Up
PPP1R15A	2.12417	6.86675	7.02235	1.07458e-06	0.000105976	5.67871	Up
IER2	2.04494	11.8521	7.00262	1.11773e-06	0.000109343	5.63954	Up
KCNB1	-1.06434	2.89218	-6.9997	1.12426e-06	0.00010946	5.63374	Down
SGK1	2.00548	11.4635	6.98638	1.15457e-06	0.000111462	5.60726	Up
LINC01105	-1.87792	4.6166	-6.937	1.2745e-06	0.00012201	5.5089	Down
BCAR3	-1.04516	7.77228	-6.93098	1.28998e-06	0.000122441	5.49688	Down
C2	-1.13699	4.65949	-6.92858	1.29619e-06	0.000122441	5.4921	Down
RNF135	-1.47128	8.9734	-6.9191	1.32109e-06	0.000123879	5.47316	Down
SLC24A3	-2.38425	6.88941	-6.91449	1.33339e-06	0.000124522	5.46394	Down
CISH	2.45619	6.21737	6.90581	1.35683e-06	0.000126197	5.44658	Up
RASD1	1.69072	11.4309	6.8961	1.38355e-06	0.000127357	5.42717	Up
CALB2	-3.05703	8.02098	-6.89323	1.39158e-06	0.000127357	5.42141	Down
BHLHE40	1.45654	7.12203	6.88323	1.41984e-06	0.000129426	5.4014	Up
HTRA1	-1.02471	11.3858	-6.85214	1.51159e-06	0.000136701	5.33906	Down
LINC01279	-2.30225	10.5931	-6.84411	1.53626e-06	0.000137234	5.32294	Down
ARC	1.86208	3.20523	6.84243	1.54149e-06	0.000137234	5.31956	Up
EPB42	-2.55266	3.77417	-6.81824	1.61866e-06	0.000143546	5.27092	Down
KDM7A	1.61448	7.19144	6.8053	1.66153e-06	0.000145655	5.24489	Up
RGS16	1.99627	3.87308	6.78654	1.72585e-06	0.000150142	5.20707	Up
RERG	-2.1809	7.6231	-6.77617	1.76249e-06	0.000152173	5.18615	Down
LOC101928927	2.0319	6.68054	6.76858	1.78981e-06	0.000153476	5.17084	Up
MCL1	1.54736	6.25023	6.76332	1.80898e-06	0.000154439	5.16023	Up
ADIRF	-1.1002	9.08701	-6.75827	1.82763e-06	0.000154742	5.15002	Down
PPL	-2.02755	6.28677	-6.75201	1.85097e-06	0.000154742	5.13738	Down
ARHGAP18	-2.28323	7.16245	-6.73915	1.89996e-06	0.000156371	5.11136	Down
CRIP1	-1.08066	9.35682	-6.73116	1.93104e-06	0.000157793	5.09521	Down
CD83	2.03023	9.20812	6.72023	1.97446e-06	0.000159631	5.07306	Up
PCDHA1	-1.91747	5.48958	-6.7089	2.02051e-06	0.000162208	5.0501	Down
RELT	1.38095	5.19701	6.70146	2.05132e-06	0.000163715	5.03502	Up
RAB17	-1.96995	4.79932	-6.6721	2.17786e-06	0.000170066	4.97541	Down
TNFRSF8	-1.08325	4.24476	-6.65591	2.25103e-06	0.000173998	4.9425	Down
PIGV	-1.17653	7.63835	-6.65216	2.26833e-06	0.000174746	4.93487	Down
RPS16P5	2.4057	5.93797	6.64257	2.31324e-06	0.000177153	4.91535	Up
GOLPH3L	-1.18081	8.97139	-6.6384	2.33304e-06	0.000177342	4.90686	Down
GALNT12	-1.63183	5.08777	-6.63521	2.34829e-06	0.00017791	4.90037	Down
DDB2	-1.32059	7.17171	-6.62805	2.38295e-06	0.00017994	4.88577	Down
AHNAK2	-1.05962	3.13119	-6.58533	2.60096e-06	0.000194276	4.79857	Down
LDLR	1.40295	4.75973	6.58424	2.60677e-06	0.000194276	4.79635	Up
CFB	-1.93071	7.10553	-6.56977	2.68541e-06	0.000197563	4.76675	Down
SOCS2	1.63365	5.63311	6.52132	2.96686e-06	0.000214816	4.66746	Up
PPP1R15B	1.3771	10.2509	6.5081	3.0488e-06	0.000220052	4.64032	Up
GADD45G	2.72092	9.41736	6.50521	3.06704e-06	0.000220672	4.63437	Up
GADD45A	2.15135	11.6015	6.4669	3.31951e-06	0.000235911	4.55557	Up
NELL2	-2.65298	6.89649	-6.4656	3.32848e-06	0.000235911	4.55288	Down
KLHL15	1.68764	9.34745	6.46511	3.33188e-06	0.000235911	4.55186	Up
ETS2	1.38964	7.28485	6.43975	3.51138e-06	0.000244575	4.49958	Up
ZNF133	-1.16213	6.43257	-6.4386	3.51975e-06	0.000244575	4.49721	Down
CKS2	1.95979	7.2172	6.43844	3.52092e-06	0.000244575	4.49688	Up
LOC101930059	-1.47037	6.46225	-6.4088	3.7441e-06	0.000257252	4.43565	Down
ATL1	-1.55624	6.40474	-6.40046	3.80946e-06	0.00026096	4.41841	Down
BIRC3	1.86323	6.82972	6.3938	3.86258e-06	0.000263808	4.40461	Up
ZNF285	-1.1911	7.38863	-6.31993	4.50471e-06	0.000302251	4.25138	Down
PRIM1	-1.44018	5.88975	-6.31335	4.56707e-06	0.000304804	4.23769	Down
CENPN	1.22874	4.57804	6.3131	4.5694e-06	0.000304804	4.23718	Up
EPHB6	-1.12988	5.57941	-6.28295	4.86661e-06	0.000321867	4.17439	Down
PDIK1L	-1.19542	7.63344	-6.28287	4.86739e-06	0.000321867	4.17423	Down
SULF1	-2.43892	9.82222	-6.27868	4.9103e-06	0.000323768	4.16548	Down
PRDM6	-1.32328	3.53418	-6.25493	5.16067e-06	0.000338327	4.11593	Down
ERRFI1	2.3391	10.6595	6.24774	5.23894e-06	0.000340531	4.10093	Up
PDLIM3	1.10802	8.90989	6.22633	5.47969e-06	0.000351191	4.05617	Up
KIAA0040	1.55726	6.6032	6.22389	5.50778e-06	0.00035151	4.05107	Up
PIGA	1.51716	7.8754	6.19198	5.88982e-06	0.000372148	3.98425	Up
CREB5	1.63736	5.23234	6.19081	5.90426e-06	0.000372148	3.98181	Up
DCP1B	-1.23509	6.13881	-6.18418	5.98727e-06	0.000376342	3.9679	Down
POLI	-1.0877	6.95248	-6.14248	6.53715e-06	0.000404243	3.88035	Down
KLF10	1.40039	11.7693	6.12208	6.8248e-06	0.000420893	3.83745	Up
KDM6B	2.69952	4.48483	6.09743	7.18993e-06	0.000438682	3.78552	Up
AOX1	-2.94429	7.45725	-6.08863	7.32516e-06	0.000445744	3.76695	Down
IER5	1.42038	11.2568	6.0801	7.45861e-06	0.00045266	3.74896	Up
APITD1	-1.18153	6.61711	-6.07738	7.50169e-06	0.000452873	3.74322	Down
ARL5B	1.58196	7.16051	6.07134	7.59823e-06	0.000457493	3.73048	Up
GSTA4	-1.27988	8.84407	-6.06843	7.64522e-06	0.000457816	3.72434	Down
FLRT2	-1.34831	6.9004	-6.0683	7.64738e-06	0.000457816	3.72406	Down
VGLL3	-2.17823	7.49252	-6.0673	7.66362e-06	0.000457816	3.72195	Down
BTN3A3	-1.57228	7.7141	-6.05973	7.7876e-06	0.000463373	3.70595	Down
COPG2IT1	-1.22391	5.5194	-6.04538	8.02831e-06	0.000472205	3.67563	Down
RBM43	-1.67673	3.72903	-6.04311	8.06702e-06	0.000473265	3.67083	Down
MRGPRF	-1.64479	7.28412	-6.04137	8.09688e-06	0.000473802	3.66715	Down
NOTCH2NL	-1.02993	9.74499	-6.03568	8.19538e-06	0.000478343	3.6551	Down
VPS37B	1.30767	7.35889	6.03382	8.2278e-06	0.000479013	3.65117	Up
DGKD	1.78418	8.60085	5.99194	8.99412e-06	0.000517049	3.56245	Up
FJX1	2.47136	7.01732	5.979	9.24539e-06	0.000527517	3.535	Up
C17orf96	1.46566	5.58602	5.96829	9.45878e-06	0.000537776	3.51226	Up
CPXM1	-2.91382	5.85109	-5.92872	1.02923e-05	0.00057436	3.42813	Down
LOC101930052	-1.52954	4.65324	-5.89058	1.11672e-05	0.000613401	3.34685	Down
METRNL	1.53333	9.77875	5.87122	1.16402e-05	0.000635905	3.30553	Up
MST4	-1.1375	5.88615	-5.87102	1.16453e-05	0.000635905	3.30509	Down
BMP4	-1.56125	7.83539	-5.84949	1.21958e-05	0.000659667	3.25908	Down
CLDN1	-2.79306	6.1152	-5.8451	1.2311e-05	0.000662769	3.24971	Down
GCH1	2.62204	9.13241	5.84008	1.24445e-05	0.000665849	3.23897	Up
IL1B	4.01698	6.20355	5.83966	1.2456e-05	0.000665849	3.23805	Up
KIAA1598	-1.46443	7.73348	-5.82294	1.29115e-05	0.000687011	3.20228	Down
MIR6732	1.79608	5.51563	5.82009	1.29909e-05	0.000689631	3.19617	Up
MT1M	3.20195	4.60112	5.81498	1.31345e-05	0.000695168	3.18522	Up
RP11-722E23.2	-1.1395	4.85884	-5.81422	1.31559e-05	0.000695168	3.1836	Down
ANXA4	-1.10629	10.5246	-5.80795	1.33345e-05	0.000701168	3.17017	Down
LY6E	-1.23718	7.37228	-5.80701	1.33614e-05	0.000701168	3.16816	Down
PPAPDC2	-1.51561	6.33297	-5.80264	1.34877e-05	0.000702958	3.15879	Down
EBPL	-1.0058	9.50874	-5.78793	1.39217e-05	0.000722289	3.12724	Down
SCG5	-2.38941	5.5541	-5.78205	1.40992e-05	0.000729842	3.11463	Down
PCK2	-1.22528	5.86144	-5.76846	1.45183e-05	0.000749839	3.08545	Down
LMCD1	2.0485	5.73401	5.75672	1.48905e-05	0.000767332	3.06024	Up
MT1HL1	1.32889	10.7983	5.74515	1.52672e-05	0.000781461	3.03536	Up
PLAUR	3.22325	6.84616	5.72894	1.5811e-05	0.000800347	3.0005	Up
SLC20A1	1.61735	7.49923	5.70457	1.66666e-05	0.000836255	2.94802	Up
C1orf168	-1.09729	3.95296	-5.70165	1.67726e-05	0.000839731	2.94171	Down
CTD-3092A11.2	-1.06081	7.47446	-5.69779	1.69131e-05	0.000844914	2.93341	Down
RSPO1	-1.76137	3.08814	-5.69062	1.71776e-05	0.000850379	2.91795	Down
EPHA2	1.92444	7.85524	5.68781	1.72826e-05	0.000850379	2.91188	Up
UAP1	1.65581	11.3753	5.68298	1.74643e-05	0.000853812	2.90146	Up
SLC18B1	-1.31337	8.3758	-5.67271	1.78575e-05	0.000867474	2.8793	Down
ATP7B	-1.15249	4.55825	-5.66582	1.81262e-05	0.00087495	2.86443	Down
EGR4	1.30665	3.90311	5.62302	1.98909e-05	0.000954094	2.77193	Up
CYP1B1	1.67335	8.62362	5.61825	2.00984e-05	0.000962031	2.76159	Up
SLCO4A1	1.01654	3.58427	5.61389	2.02896e-05	0.00096822	2.75217	Up
SYT17	-1.30334	3.23407	-5.61338	2.03123e-05	0.00096822	2.75105	Down
LOC100272216	-1.93366	7.32589	-5.59184	2.1287e-05	0.00100009	2.70439	Down
MN1	-1.54056	7.7356	-5.56464	2.25864e-05	0.00104823	2.64541	Down
RTP4	-2.20275	5.41606	-5.55291	2.31716e-05	0.00106888	2.61995	Down
MGARP	-2.19338	7.89942	-5.54426	2.36129e-05	0.00108486	2.60117	Down
OSR1	-1.27693	3.5019	-5.51697	2.5063e-05	0.00114004	2.54185	Down
ASXL1	1.05131	6.7892	5.46803	2.7896e-05	0.00123694	2.43527	Up
AB074162	-1.55864	4.92052	-5.46273	2.8222e-05	0.0012454	2.42371	Down
LDLRAP1	-1.00298	5.25196	-5.45254	2.88593e-05	0.0012664	2.40149	Down
VAMP8	-1.69196	8.84471	-5.43471	3.00102e-05	0.00130787	2.36258	Down
FLNC	1.31002	12.3988	5.43231	3.01687e-05	0.00130979	2.35734	Up
ZNF564	-1.03586	7.23712	-5.42932	3.03676e-05	0.00131593	2.3508	Down
RP11-119F7.5	-1.44765	5.27206	-5.42339	3.07653e-05	0.00133064	2.33785	Down
NUDT5	-1.17706	7.79902	-5.39496	3.27483e-05	0.00140578	2.27571	Down
FZD7	-1.17082	9.96721	-5.38905	3.31768e-05	0.00141885	2.26278	Down
NMU	-1.97973	4.31076	-5.38416	3.35355e-05	0.00142834	2.25208	Down
CX3CR1	-1.25391	5.13298	-5.38348	3.35859e-05	0.00142834	2.25058	Down
FADD	-1.20659	6.12264	-5.36936	3.46457e-05	0.00146663	2.21968	Down
CKMT1A	-3.1065	5.89813	-5.36869	3.46971e-05	0.00146663	2.21821	Down
DDX21	1.76858	11.4698	5.34992	3.6162e-05	0.00151814	2.17707	Up
ZBTB8A	-1.03029	8.6226	-5.34556	3.65107e-05	0.00152718	2.16753	Down
MB21D2	1.69578	8.6563	5.309	3.95774e-05	0.00163159	2.08732	Up
CHSY1	1.3727	12.4413	5.28716	4.15333e-05	0.00169997	2.03935	Up
DAPK1	-1.16141	5.59602	-5.28137	4.20683e-05	0.00171879	2.02663	Down
KDR	-1.19642	9.31878	-5.28031	4.21671e-05	0.00171976	2.02429	Down
DUSP1	1.29808	6.10993	5.27544	4.26237e-05	0.00173529	2.01358	Up
IL4R	1.51069	8.62989	5.27271	4.28823e-05	0.00174271	2.00757	Up
DCUN1D3	1.52479	7.21847	5.26491	4.36285e-05	0.00176364	1.99042	Up
KBTBD7	-1.28359	7.12421	-5.25564	4.45327e-05	0.0017907	1.97002	Down
DCBLD1	-1.10113	5.4474	-5.25338	4.47559e-05	0.0017963	1.96505	Down
RARRES1	-1.90737	8.30797	-5.24056	4.60444e-05	0.00182899	1.93684	Down
MEOX2	-1.22788	5.28279	-5.22663	4.74881e-05	0.00187482	1.90615	Down
ZNF658	-1.60939	6.63256	-5.22627	4.7526e-05	0.00187482	1.90536	Down
CFI	-2.72026	9.07562	-5.21741	4.84685e-05	0.00190543	1.88584	Down
PANX1	1.2455	6.18221	5.21224	4.90265e-05	0.00191748	1.87446	Up
UGCG	2.3105	8.04817	5.21103	4.91589e-05	0.00191852	1.87178	Up
ADAP2	-1.54586	6.34648	-5.21046	4.92208e-05	0.00191852	1.87053	Down
SERPINB1	1.04845	7.85625	5.20146	5.02139e-05	0.00194398	1.85067	Up
PGAP1	1.1059	6.28515	5.20058	5.03121e-05	0.00194449	1.84873	Up
DMKN	-1.48882	5.8864	-5.19863	5.053e-05	0.00194706	1.84444	Down
PPFIBP2	-1.56965	5.26211	-5.19344	5.11146e-05	0.00196555	1.833	Down
MAT2A	1.67869	9.42878	5.17741	5.29666e-05	0.00202625	1.79763	Up
LINC00094	-1.15313	7.63248	-5.17443	5.33184e-05	0.00202982	1.79105	Down
INMT	-1.02415	9.64406	-5.17266	5.35289e-05	0.00203445	1.78714	Down
TDG	1.21137	11.381	5.16345	5.46356e-05	0.00205215	1.7668	Up
SGOL2	-1.15401	4.16047	-5.16149	5.48746e-05	0.00205215	1.76247	Down
ZBED8	-1.66766	6.86058	-5.12947	5.89248e-05	0.00216752	1.69171	Down
KCTD14	-1.69784	2.91076	-5.12305	5.97726e-05	0.00219518	1.67752	Down
NOLC1	1.14768	7.57005	5.11249	6.11948e-05	0.00224022	1.65416	Up
GNAI1	-1.00048	7.52498	-5.09512	6.36105e-05	0.00231384	1.6157	Down
MEST	-1.73537	9.67102	-5.08297	6.53564e-05	0.00236982	1.58881	Down
RAB27A	1.54856	7.4661	5.07254	6.68956e-05	0.00241043	1.56569	Up
UBASH3B	1.02555	3.52537	5.07252	6.68977e-05	0.00241043	1.56566	Up
RP6-99M1.2	1.42239	4.27723	5.06922	6.73929e-05	0.00241436	1.55833	Up
TGIF1	1.08794	4.57116	5.06487	6.80496e-05	0.00242308	1.5487	Up
HAS1	2.38347	9.77965	5.06457	6.80961e-05	0.00242308	1.54803	Up
PDZK1IP1	-1.79188	3.21982	-5.04989	7.03637e-05	0.00248475	1.5155	Down
MT1H	1.2457	10.7529	5.04769	7.07109e-05	0.00248902	1.51061	Up
RBP4	-1.53662	5.54665	-5.03975	7.19754e-05	0.002522	1.49301	Down
TSPAN5	-1.17594	5.05764	-5.03362	7.29686e-05	0.00254889	1.4794	Down
C4orf48	-1.3943	7.2444	-5.02799	7.3892e-05	0.00256937	1.46692	Down
LOC100996412	-1.84589	5.27357	-5.0206	7.51239e-05	0.00260035	1.4505	Down
PLA2G2A	-2.18871	10.7555	-5.01728	7.56839e-05	0.00261203	1.44313	Down
CCL11	2.98109	3.81918	5.00591	7.76321e-05	0.00266613	1.4179	Up
CA2	2.53325	7.04146	4.99839	7.8949e-05	0.00269605	1.4012	Up
FBP1	-2.19547	4.57884	-4.96849	8.4417e-05	0.00286567	1.33473	Down
CYB561A3	-1.02928	7.66581	-4.96028	8.59843e-05	0.00291024	1.31647	Down
MT1X	1.33649	11.2374	4.95181	8.76322e-05	0.00295495	1.29764	Up
INHBA	2.58053	7.81576	4.94975	8.8037e-05	0.00296178	1.29306	Up
TRIM6	-1.42725	6.4577	-4.94058	8.98654e-05	0.00300164	1.27267	Down
GIMAP1	-1.30049	7.31034	-4.93658	9.06755e-05	0.0030224	1.26376	Down
LURAP1L	-1.4739	4.78203	-4.91412	9.53632e-05	0.00313493	1.21375	Down
TEAD4	1.57397	6.01443	4.8921	0.000100198	0.00325642	1.1647	Up
CLIC3	-1.46271	3.18334	-4.88674	0.000101411	0.00327996	1.15276	Down
EGLN3	1.18156	9.20747	4.87191	0.000104849	0.0033693	1.1197	Up
RP11-469M7.1	1.68616	7.09809	4.86765	0.000105858	0.00338241	1.1102	Up
KLF6	1.13559	7.97536	4.86708	0.000105996	0.00338241	1.10891	Up
DUSP6	1.30164	9.59034	4.86606	0.000106239	0.00338288	1.10664	Up
CCDC80	-2.08218	10.1684	-4.86395	0.000106743	0.00338737	1.10194	Down
SLC39A11	-1.2873	5.51364	-4.84895	0.000110408	0.0034652	1.06847	Down
IFIT1	-1.08699	9.9301	-4.84614	0.000111108	0.00347762	1.06221	Down
F5	-1.80833	7.24338	-4.84535	0.000111306	0.00347906	1.06044	Down
OAS1	-1.40757	5.11352	-4.84411	0.000111617	0.00348403	1.05767	Down
KBTBD6	-1.08893	7.65479	-4.83603	0.000113666	0.00353352	1.03964	Down
WDR11	-1.10489	7.04254	-4.83074	0.000115026	0.00356398	1.02784	Down
MESDC1	1.79699	4.73631	4.81532	0.000119093	0.00366734	0.993405	Up
ZNF30	-1.13523	7.41033	-4.80813	0.000121036	0.00371222	0.977356	Down
DOCK11	-1.13607	5.65602	-4.80713	0.00012131	0.00371563	0.975117	Down
TMEM2	2.3272	7.93186	4.78007	0.000128941	0.00389719	0.914657	Up
LGALS2	-1.54799	4.15052	-4.75329	0.000136974	0.00407539	0.854775	Down
MYO5B	-1.06937	5.35894	-4.72997	0.000144381	0.00422271	0.802609	Down
RP13-270P17.3	1.13482	6.94176	4.72731	0.000145252	0.00423898	0.796654	Up
TMEM243	-1.30091	8.28725	-4.72031	0.000147567	0.00429013	0.780991	Down
CCL8	3.21736	7.79139	4.71089	0.000150743	0.00436584	0.7599	Up
LOC400043	-1.01087	6.91223	-4.7049	0.000152796	0.0044197	0.746505	Down
SLC25A43	-1.01844	6.35837	-4.67169	0.000164719	0.00468171	0.672113	Down
LOC100507311	-1.28051	5.34152	-4.66046	0.000168959	0.00477257	0.646958	Down
ZNF674-AS1	1.86279	4.39696	4.65049	0.000172817	0.00483973	0.62461	Up
PHYHIP	-1.30133	4.16018	-4.62771	0.00018197	0.0050589	0.573538	Down
SOX7	1.43697	7.04472	4.61421	0.000187626	0.00517588	0.543257	Up
FST	2.84008	6.70432	4.60894	0.000189881	0.00521546	0.531436	Up
MIR155	2.00937	4.03989	4.59424	0.000196316	0.00534726	0.498469	Up
CAPG	-1.49689	5.16678	-4.58729	0.000199435	0.0054129	0.482875	Down
KRT18	-1.64864	9.90233	-4.57641	0.000204421	0.00550137	0.458453	Down
ITLN1	-4.92522	13.1666	-4.57486	0.000205139	0.00550137	0.454987	Down
KIAA1804	-1.11785	3.86598	-4.57444	0.000205335	0.00550137	0.454043	Down
GPX8	-1.23501	8.78445	-4.57443	0.00020534	0.00550137	0.454019	Down
ISG20	2.5325	5.78461	4.567	0.000208831	0.00557532	0.437349	Up
BOK	-1.55342	5.38162	-4.56621	0.000209209	0.00557891	0.435558	Down
MTHFD2	1.04448	5.88481	4.56434	0.000210099	0.00559268	0.43136	Up
ZSCAN31	-1.19094	7.88174	-4.56409	0.000210215	0.00559268	0.430818	Down
ZNF879	-1.37432	6.95891	-4.56215	0.000211146	0.00560443	0.426446	Down
RP1-78O14.1	-1.67871	3.59341	-4.55835	0.000212973	0.00564639	0.417925	Down
LONRF3	1.87441	4.29083	4.55549	0.000214362	0.00566351	0.4115	Up
CCL7	1.29856	4.07495	4.53316	0.000225515	0.00589015	0.361359	Up
TRIM68	-1.00075	7.79806	-4.52521	0.000229621	0.00594313	0.343524	Down
AGO2	1.07458	6.21603	4.50696	0.000239349	0.00612562	0.302517	Up
SLC7A7	-1.89992	8.18219	-4.48591	0.00025108	0.00636885	0.255241	Down
GIMAP2	-2.14897	6.14779	-4.47872	0.000255221	0.00645956	0.239081	Down
CCL20	3.42456	4.03203	4.46241	0.000264868	0.00661593	0.20243	Up
INSIG1	1.62347	9.51895	4.46032	0.000266133	0.00661861	0.197727	Up
HMOX1	3.88512	8.51018	4.45763	0.000267765	0.00663776	0.191687	Up
PNO1	1.04001	7.71137	4.42641	0.00028749	0.00702752	0.121506	Up
ARL4C	1.29886	4.57083	4.42454	0.000288717	0.00704927	0.117299	Up
PLEKHG1	1.51687	5.93752	4.41277	0.000296564	0.00721081	0.0908312	Up
ATG4C	-1.06209	6.43938	-4.41138	0.000297502	0.00722596	0.087712	Down
CDH3	-1.05012	2.69214	-4.40688	0.000300567	0.00726952	0.0775973	Down
NLRC3	-1.05216	5.18017	-4.40508	0.000301804	0.00727636	0.073544	Down
RDH10	1.24165	5.77081	4.40039	0.000305046	0.00733136	0.0629969	Up
PFKFB3	1.88045	10.3431	4.38547	0.000315597	0.00750219	0.0294436	Up
TIGD2	-1.33021	6.05644	-4.38305	0.000317336	0.00751983	0.0240211	Down
LOC101928916	1.80179	10.8682	4.38284	0.000317489	0.00751983	0.0235446	Up
OLFML2B	-1.00986	5.95669	-4.37862	0.000320556	0.00756897	0.0140588	Down
TNFRSF10B	1.03319	5.61558	4.36771	0.000328634	0.00773147	-0.0104927	Up
RHPN2	-1.39141	5.39119	-4.35705	0.00033672	0.00787414	-0.0344694	Down
ANXA9	-1.30535	3.11726	-4.33801	0.000351663	0.00816029	-0.0772912	Down
TNFAIP2	1.12891	5.363	4.33367	0.000355161	0.00821647	-0.0870517	Up
MAP3K7CL	1.22432	4.64334	4.32821	0.000359612	0.00830264	-0.0993304	Up
GPR3	1.38496	3.90873	4.31162	0.000373485	0.00851978	-0.136647	Up
FAM107A	1.08767	7.53505	4.27874	0.000402592	0.00899541	-0.210604	Up
SYBU	-1.23107	7.82509	-4.27644	0.000404717	0.00901429	-0.215791	Down
SLC22A4	1.23709	5.89759	4.26797	0.000412621	0.00912294	-0.234845	Up
RBBP8	1.12117	7.4494	4.25597	0.000424077	0.00932074	-0.261822	Up
BTN3A2	-1.16931	8.78421	-4.20609	0.000475271	0.0101344	-0.374033	Down
UPP1	1.33709	7.70191	4.20492	0.000476539	0.010152	-0.376656	Up
ETAA1	-1.02477	6.74735	-4.20224	0.000479463	0.0101875	-0.382676	Down
PDE4B	1.60348	7.53248	4.18611	0.000497474	0.0104808	-0.418962	Up
C8orf4	1.18055	10.243	4.18433	0.000499499	0.0105095	-0.42296	Up
TMEM45A	-1.2933	9.40866	-4.17654	0.000508471	0.0105902	-0.440475	Down
ZSWIM6	1.241	8.53838	4.1764	0.000508644	0.0105902	-0.440809	Up
EMP1	1.37862	7.65594	4.17618	0.000508897	0.0105902	-0.441298	Up
LOC101929886	-1.05902	3.46115	-4.17567	0.000509488	0.0105902	-0.442439	Down
ACKR1	1.31855	4.08993	4.17567	0.000509489	0.0105902	-0.442442	Up
DACT1	1.7637	7.70464	4.17476	0.000510553	0.0106002	-0.444494	Up
WNT2B	-1.0359	5.913	-4.15773	0.000530819	0.010873	-0.482781	Down
BAZ1A	1.80791	7.56122	4.15518	0.000533921	0.0108895	-0.488513	Up
PLAU	2.78882	6.11819	4.115	0.00058531	0.0115547	-0.578853	Up
B4GALT5	1.08413	9.72458	4.11277	0.000588297	0.0115901	-0.583855	Up
CYP4X1	-1.31281	9.81742	-4.10827	0.000594384	0.0116674	-0.593971	Down
MIR17	1.01746	3.29058	4.10118	0.000604105	0.0118035	-0.60991	Up
GMNN	-1.09591	7.24739	-4.09228	0.00061652	0.0119949	-0.629897	Down
SERTM1	-3.09122	3.80323	-4.07819	0.000636716	0.0122421	-0.661558	Down
EMB	-1.13628	5.89367	-4.07645	0.000639265	0.0122705	-0.665483	Down
ARRDC4	1.16182	10.7033	4.06968	0.000649239	0.0123995	-0.680687	Up
ANXA3	-1.48377	9.11923	-4.04969	0.000679617	0.0127683	-0.725585	Down
NABP1	2.05364	8.23978	4.042	0.000691689	0.0129085	-0.742869	Up
PPM1M	-1.35263	4.42466	-4.03833	0.000697519	0.0130067	-0.751106	Down
EREG	1.29389	3.1518	4.02678	0.000716201	0.0132793	-0.777045	Up
FCGBP	-1.04394	6.18526	-4.01302	0.000739098	0.0136305	-0.807922	Down
PELI1	1.16688	6.41716	4.01278	0.000739515	0.0136305	-0.808475	Up
CD69	2.03213	4.1459	3.99553	0.000769277	0.0140024	-0.847176	Up
RNF182	-1.30705	5.73385	-3.98485	0.000788309	0.0143033	-0.871141	Down
GLA	1.27439	9.57127	3.9778	0.000801124	0.0144784	-0.886952	Up
GPR34	-2.83613	6.96474	-3.97651	0.000803492	0.0144835	-0.889845	Down
CLCF1	1.13789	5.31481	3.97523	0.000805863	0.0144835	-0.892734	Up
SERPING1	-1.13944	11.027	-3.97421	0.000807733	0.0144835	-0.895007	Down
MLKL	1.31544	7.50838	3.9729	0.000810169	0.0145155	-0.897959	Up
MIR3682	1.12689	5.37633	3.97172	0.00081236	0.0145155	-0.900606	Up
RP11-5C23.1	-1.09897	6.1688	-3.96073	0.000833047	0.0148212	-0.925254	Down
ADH1C	-1.51919	7.35319	-3.94263	0.000868257	0.0152813	-0.96582	Down
BCL2A1	3.62884	4.52673	3.93945	0.00087461	0.0153342	-0.972962	Up
PDGFRL	-1.63482	8.38664	-3.92175	0.000910759	0.0157626	-1.01263	Down
C4A	-1.01351	7.70025	-3.92024	0.000913904	0.0158051	-1.01601	Down
FSTL3	1.15955	8.1955	3.88852	0.000982702	0.0167668	-1.08706	Up
PDGFC	-1.08498	7.41645	-3.85982	0.00104937	0.0176153	-1.15129	Down
SDC4	1.20232	11.4663	3.84327	0.00108986	0.0181485	-1.18831	Up
IL15RA	1.1013	7.60294	3.82655	0.00113233	0.0187187	-1.22569	Up
ABRACL	-1.39259	7.68416	-3.82606	0.00113361	0.0187187	-1.22679	Down
URB2	1.46554	6.26341	3.82594	0.00113392	0.0187187	-1.22706	Up
MARCO	-1.90958	9.26865	-3.82066	0.00114768	0.0188642	-1.23885	Down
WARS	1.13303	9.51095	3.8075	0.00118275	0.0193295	-1.26825	Up
LINC00473	1.22854	2.84299	3.80293	0.00119517	0.0194492	-1.27846	Up
SLC16A6	1.13747	3.89688	3.80183	0.00119817	0.0194703	-1.28091	Up
IGLL3P	-2.0759	6.91316	-3.79909	0.00120571	0.0195372	-1.28703	Down
ZMYM1	-1.18457	6.0205	-3.79034	0.00123006	0.0199037	-1.30657	Down
ACKR4	-1.48129	6.61606	-3.78638	0.00124125	0.0199857	-1.31541	Down
IGJ	-2.69382	7.1908	-3.78347	0.00124953	0.0200571	-1.3219	Down
C10orf2	1.08609	7.18137	3.782	0.00125375	0.02006	-1.32519	Up
EIF4A1	1.38144	10.7035	3.76414	0.00130596	0.0206648	-1.36503	Up
METTL21B	-1.31059	3.66114	-3.75685	0.0013279	0.0209162	-1.38129	Down
GNPNAT1	1.25021	9.52129	3.75398	0.00133664	0.0210187	-1.38768	Up
SLC41A2	-1.35032	5.14921	-3.74968	0.00134985	0.0211828	-1.39728	Down
TRIL	-1.26642	4.474	-3.73622	0.001392	0.0217251	-1.42729	Down
VEGFA	1.00722	6.92834	3.71225	0.00147032	0.0226159	-1.48066	Up
CASC7	1.278	3.71514	3.71024	0.00147711	0.0226768	-1.48515	Up
ETS1	1.0287	7.52906	3.68737	0.00155625	0.0235808	-1.53602	Up
CEMIP	-1.02476	2.69902	-3.67486	0.00160134	0.0240885	-1.56384	Down
ASTN1	-1.44539	2.95632	-3.67125	0.0016146	0.0242561	-1.57187	Down
RP11-309G3.3	1.54422	5.8141	3.66218	0.00164833	0.0245707	-1.59201	Up
TLR5	-1.15509	6.32337	-3.65806	0.0016639	0.0247208	-1.60117	Down
NFKB1	1.20209	8.5015	3.64716	0.00170582	0.0251356	-1.62539	Up
LOC100129518	1.18511	9.30405	3.64022	0.00173304	0.0254011	-1.64079	Up
CSF1R	-1.21742	7.29149	-3.63852	0.00173977	0.0254513	-1.64456	Down
PYCARD	-1.22011	6.54044	-3.61947	0.00181697	0.0262286	-1.68681	Down
GIMAP7	-1.1618	10.0792	-3.61507	0.00183531	0.0264038	-1.69658	Down
PHLDA1	1.13898	6.78706	3.59751	0.00191022	0.0272311	-1.73548	Up
MBNL1-AS1	1.07243	8.64161	3.59227	0.00193319	0.0273658	-1.74709	Up
KANK4	-2.14712	5.70156	-3.59154	0.00193641	0.0273658	-1.74871	Down
NIP7	1.19633	7.22939	3.5869	0.00195699	0.0275714	-1.75899	Up
KPNA2	1.14517	10.8393	3.56914	0.00203773	0.028481	-1.79827	Up
OLFML1	-1.06769	9.00614	-3.55902	0.00208525	0.0290563	-1.82066	Down
COL1A2	-1.22977	10.0593	-3.54412	0.00215717	0.0297147	-1.85358	Down
ADAMTS8	1.20091	4.12512	3.54294	0.00216295	0.0297763	-1.85618	Up
POC5	-1.13977	5.91894	-3.53466	0.00220413	0.0301826	-1.87448	Down
FMO1	-1.80276	3.36251	-3.53433	0.00220574	0.0301838	-1.87519	Down
IL7	-1.1188	4.07452	-3.53168	0.00221908	0.030312	-1.88104	Down
CTSE	-1.78463	4.68579	-3.52091	0.0022741	0.0308792	-1.90481	Down
COL3A1	-1.1492	10.8621	-3.51956	0.0022811	0.0309022	-1.90779	Down
PLEKHO1	1.06487	6.67159	3.51954	0.0022812	0.0309022	-1.90783	Up
CHIC2	1.30484	6.56976	3.50252	0.00237122	0.0316901	-1.94537	Up
GCLM	1.04847	8.07516	3.50099	0.00237948	0.0317819	-1.94874	Up
HSPA6	2.0461	5.97915	3.49652	0.0024038	0.0319793	-1.95859	Up
GABPB1	1.11818	5.6189	3.48278	0.00247997	0.032695	-1.98883	Up
ARL13B	1.05584	7.5078	3.47188	0.00254214	0.033332	-2.01282	Up
OSMR	1.27411	6.98803	3.47	0.00255305	0.0333984	-2.01697	Up
SERPINB2	2.6621	3.87578	3.46607	0.00257593	0.0336389	-2.02561	Up
CNN1	1.3747	10.1088	3.45871	0.00261929	0.0339543	-2.04178	Up
POLR1C	1.0476	8.42364	3.43641	0.00275523	0.0352768	-2.09076	Up
PCK1	-1.96142	6.0719	-3.4255	0.00282423	0.0359253	-2.11469	Down
CEBPA	-1.52116	6.50823	-3.42068	0.00285531	0.0362136	-2.12528	Down
AKAP12	1.01916	8.48981	3.40379	0.00296671	0.0372549	-2.16229	Up
LOC101928102	-1.16637	3.37858	-3.40097	0.00298567	0.0374313	-2.16845	Down
MAB21L2	-1.17567	4.44043	-3.38859	0.00307059	0.0382177	-2.19556	Down
PDK4	1.96002	7.7719	3.38625	0.00308691	0.0382189	-2.20068	Up
ADORA3	-1.05498	2.91199	-3.38149	0.00312035	0.038566	-2.21109	Down
IL1RAP	1.07234	5.63526	3.37271	0.00318297	0.0390699	-2.23028	Up
C5AR1	2.58932	4.23322	3.36292	0.00325425	0.0396894	-2.25167	Up
MXD1	1.35547	5.9846	3.35647	0.00330208	0.0400592	-2.26576	Up
STEAP4	1.61388	7.07496	3.34893	0.00335882	0.0404899	-2.2822	Up
IFRD1	1.17365	7.9585	3.33976	0.0034292	0.0411001	-2.30221	Up
BYSL	1.07227	7.01051	3.3383	0.00344051	0.0411635	-2.30539	Up
SERPINA3	1.73652	9.62155	3.33809	0.00344214	0.0411635	-2.30584	Up
LRG1	1.21035	5.38509	3.33327	0.0034798	0.041446	-2.31634	Up
BMP2	1.26612	7.5734	3.32645	0.00353382	0.0418498	-2.3312	Up
RAB38	-1.20693	5.69622	-3.30239	0.00373103	0.0435355	-2.38355	Down
KDELC1	-1.07313	5.49678	-3.28628	0.00386909	0.0445519	-2.41855	Down
AC012065.7	-1.17372	6.82363	-3.27522	0.00396679	0.0453245	-2.44256	Down
PALM2	1.58684	4.30176	3.25458	0.0041555	0.047094	-2.48729	Up
HCP5	-1.05697	6.89994	-3.24624	0.0042342	0.047747	-2.50534	Down
CPNE2	-1.03254	7.43013	-3.2444	0.00425184	0.0478987	-2.50934	Down
MSC	1.01756	4.25604	3.23225	0.0043696	0.0488166	-2.5356	Up
COLEC12	-1.55919	9.04452	-3.2271	0.00442051	0.0491693	-2.54674	Down
SLC16A10	1.04618	4.20302	3.22067	0.00448487	0.0496466	-2.56063	Up

## Sheet: P-post vs P-pre
gene	logFC	AveExpr	t	P.Value	adj.P.Val	B	Sig
FOSB	8.62287	8.11681	23.2568	2.01357e-15	3.72052e-11	23.6877	Up
CH25H	6.48759	6.67282	22.6577	3.2522e-15	3.72052e-11	23.3327	Up
IL6	9.47034	6.99062	20.3392	2.34085e-14	1.78529e-10	21.8178	Up
CXCL2	2.60763	5.00163	18.875	9.08209e-14	5.19496e-10	20.7305	Up
EGR1	4.61727	9.56177	17.5609	3.33378e-13	1.52554e-09	19.6549	Up
SIK1	2.89434	5.51142	17.3686	4.06171e-13	1.54887e-09	19.4889	Up
EGR3	6.72392	8.43869	16.3964	1.13696e-12	3.6402e-09	18.6132	Up
CSRNP1	4.79576	7.98564	16.2927	1.2728e-12	3.6402e-09	18.5161	Up
SOCS3	2.10717	5.27482	16.0948	1.58171e-12	4.02105e-09	18.3286	Up
C11orf96	3.89464	12.0147	15.7604	2.29558e-12	5.25229e-09	18.0056	Up
NR4A2	5.85143	7.62334	15.6205	2.68808e-12	5.59121e-09	17.868	Up
BRE-AS1	5.019	5.24142	15.4624	3.21795e-12	6.13557e-09	17.7108	Up
MIR21	3.21397	8.89336	14.5951	8.88611e-12	1.56395e-08	16.8143	Up
CCL2	6.45412	9.85167	14.0945	1.63485e-11	2.62593e-08	16.2694	Up
NR4A3	4.84921	6.42907	14.0262	1.77913e-11	2.62593e-08	16.1934	Up
MAFF	4.57394	9.62746	13.9538	1.94697e-11	2.62593e-08	16.1123	Up
SELE	7.07777	6.51448	13.9521	1.95108e-11	2.62593e-08	16.1104	Up
CDKN1A	3.96089	9.94318	13.8037	2.3493e-11	2.98622e-08	15.943	Up
IER3	2.56735	12.3616	13.66	2.81693e-11	3.39218e-08	15.779	Up
ZFP36	4.53766	10.6425	13.5874	3.08919e-11	3.53404e-08	15.6954	Up
THBS1	2.76903	4.9117	13.4535	3.66652e-11	3.99476e-08	15.54	Up
SLC2A14	4.53051	6.33243	13.3424	4.23117e-11	4.40042e-08	15.4099	Up
GEM	3.50578	11.5771	13.2133	5.0032e-11	4.97709e-08	15.2572	Up
VMP1	5.53276	6.659	12.9004	7.55319e-11	7.13091e-08	14.8807	Up
IL1RN	1.35329	3.13752	12.8739	7.82441e-11	7.13091e-08	14.8484	Up
MCL1	1.26037	6.07199	12.8476	8.10331e-11	7.13091e-08	14.8162	Up
NAMPT	2.70967	9.34435	12.5162	1.26651e-10	1.07325e-07	14.4055	Up
CXCL8	5.52789	6.08026	12.3592	1.57007e-10	1.28297e-07	14.2071	Up
SLC2A3	3.70833	7.88537	12.2519	1.8207e-10	1.43647e-07	14.07	Up
ADAMTS1	2.91417	9.60437	12.1269	2.16617e-10	1.65207e-07	13.9089	Up
SPIDR	1.01001	5.29791	11.9943	2.60897e-10	1.92558e-07	13.7362	Up
JUNB	4.36734	7.80641	11.9111	2.93417e-10	2.09793e-07	13.6269	Up
DUSP5	4.19869	6.95579	11.8807	3.06304e-10	2.12371e-07	13.5869	Up
EGR2	4.84056	9.42823	11.5413	4.98454e-10	3.3543e-07	13.1321	Up
HAS2	4.4154	6.93768	11.5189	5.14886e-10	3.36588e-07	13.1018	Up
PLAUR	3.21095	6.30972	11.4605	5.60606e-10	3.56296e-07	13.022	Up
PTX3	6.12692	7.64256	11.3983	6.13918e-10	3.79633e-07	12.9369	Up
MYC	4.4333	8.80873	11.2884	7.21589e-10	4.34473e-07	12.7851	Up
ICAM1	3.24887	6.03565	11.1653	8.65939e-10	5.08018e-07	12.6136	Up
PIM1	2.73219	8.9072	11.0402	1.04376e-09	5.89566e-07	12.4377	Up
TNFAIP3	3.60967	8.45009	11.0321	1.05648e-09	5.89566e-07	12.4262	Up
IRF1	3.07988	8.1117	10.917	1.25661e-09	6.84556e-07	12.2625	Up
SLC7A5	3.57112	7.20022	10.8879	1.31326e-09	6.98777e-07	12.2208	Up
LIF	4.71722	5.97692	10.7588	1.59833e-09	8.31132e-07	12.035	Up
ARID5A	2.33523	7.22103	10.7016	1.74462e-09	8.87041e-07	11.9521	Up
CEBPD	3.09038	8.01838	10.6785	1.80768e-09	8.99124e-07	11.9185	Up
GPRC5A	3.66845	6.0499	10.6515	1.88431e-09	9.17299e-07	11.8791	Up
CYR61	4.25771	9.72111	10.5357	2.25393e-09	1.07438e-06	11.7092	Up
FOS	7.53029	7.58406	10.429	2.6614e-09	1.24271e-06	11.5513	Up
BCL3	1.02013	4.58133	10.355	2.98871e-09	1.36763e-06	11.441	Up
CCL8	4.47141	7.1636	10.1976	3.83288e-09	1.71953e-06	11.204	Up
SERTAD1	2.88601	9.9504	10.0838	4.59601e-09	2.02224e-06	11.0307	Up
ATF3	2.16984	4.90652	9.97838	5.44484e-09	2.35053e-06	10.8687	Up
NFIL3	2.22059	11.7217	9.73722	8.06112e-09	3.39771e-06	10.4929	Up
IER2	2.62278	11.5869	9.72923	8.16757e-09	3.39771e-06	10.4804	Up
THAP2	1.82049	4.88641	9.63561	9.52956e-09	3.8935e-06	10.3324	Up
PTGS2	5.24347	6.30938	9.58728	1.03233e-08	4.14381e-06	10.2555	Up
CXCL3	3.6375	7.40005	9.5641	1.07282e-08	4.23211e-06	10.2185	Up
RND1	5.40839	5.1782	9.52767	1.13984e-08	4.42025e-06	10.1603	Up
PNP	4.90722	8.04607	9.51395	1.16619e-08	4.44705e-06	10.1383	Up
FOSL1	3.17759	4.62673	9.37395	1.47443e-08	5.52181e-06	9.91265	Up
GADD45B	2.50598	9.5853	9.36521	1.4963e-08	5.52181e-06	9.89847	Up
ADAMTS9	1.6875	4.37408	9.20163	1.97418e-08	7.04809e-06	9.63127	Up
MAT2A	1.42414	9.2226	9.19334	2.0023e-08	7.04809e-06	9.61763	Up
SLC25A25	2.41142	7.98356	9.1626	2.11015e-08	7.31518e-06	9.567	Up
HBEGF	1.47924	5.82368	9.09962	2.35051e-08	7.84486e-06	9.46283	Up
DDX21	1.27131	11.3126	9.09637	2.36368e-08	7.84486e-06	9.45743	Up
THBD	3.14385	7.95804	9.09585	2.3658e-08	7.84486e-06	9.45657	Up
SLC19A2	1.84582	10.8282	8.99605	2.80973e-08	9.1838e-06	9.29035	Up
FOSL2	1.60639	5.89115	8.93633	3.11612e-08	1.00418e-05	9.19023	Up
CCNL1	1.30667	5.81577	8.89878	3.32639e-08	1.05705e-05	9.12704	Up
RND3	2.0702	11.2502	8.85206	3.60882e-08	1.13109e-05	9.04813	Up
TNFAIP6	5.73113	7.081	8.77233	4.14993e-08	1.27623e-05	8.91278	Up
NR4A1	2.22292	5.32165	8.76775	4.18345e-08	1.27623e-05	8.90498	Up
APOLD1	1.62625	10.8237	8.73766	4.41087e-08	1.3279e-05	8.85366	Up
GPR4	1.07247	3.94175	8.66766	4.99132e-08	1.46412e-05	8.73376	Up
KLF4	2.72795	8.016	8.5655	5.98478e-08	1.73331e-05	8.55755	Up
SPSB1	2.70438	7.348	8.38814	8.22785e-08	2.35316e-05	8.24816	Up
RGS16	2.1402	3.92114	8.31335	9.42112e-08	2.66118e-05	8.11637	Up
CHD1	1.74945	8.83515	8.20326	1.15149e-07	3.21294e-05	7.92091	Up
CXCL1	5.02105	7.085	8.13129	1.31403e-07	3.6223e-05	7.7922	Up
LOC101928927	1.83383	6.21876	8.12459	1.33033e-07	3.62356e-05	7.78019	Up
PFKFB3	2.26191	9.85704	8.08858	1.4216e-07	3.82662e-05	7.71547	Up
TNFRSF10D	1.33558	4.76745	8.03377	1.57322e-07	4.13738e-05	7.61661	Up
CREM	1.22785	7.21265	8.00161	1.66987e-07	4.34165e-05	7.55842	Up
ARRDC4	1.16545	10.7035	7.8743	2.11736e-07	5.44329e-05	7.32655	Up
CD83	2.14729	8.72967	7.8635	2.16065e-07	5.49285e-05	7.30678	Up
CRISPLD2	1.33236	6.17401	7.74799	2.68553e-07	6.75218e-05	7.09418	Up
ZBTB21	1.96334	8.64575	7.74006	2.72607e-07	6.77961e-05	7.07952	Up
ZNF331	2.01403	9.19316	7.65817	3.18413e-07	7.83364e-05	6.92756	Up
STC1	3.11658	5.82878	7.61996	3.42452e-07	8.33542e-05	6.85632	Up
UGCG	1.96829	7.68834	7.58108	3.68854e-07	8.88357e-05	6.7836	Up
KLF10	1.46687	11.7906	7.56661	3.79206e-07	9.03774e-05	6.7565	Up
LOC100996792	1.16735	8.31021	7.55072	3.90932e-07	9.22115e-05	6.72667	Up
SPHK1	2.84237	5.88321	7.515	4.18664e-07	9.67579e-05	6.65954	Up
CHSY1	1.19938	12.2762	7.50325	4.28231e-07	9.70873e-05	6.6374	Up
GADD45A	2.10099	11.4649	7.49815	4.32453e-07	9.70873e-05	6.62779	Up
ETS2	1.2984	7.1326	7.49771	4.32819e-07	9.70873e-05	6.62696	Up
RP11-373D23.2	2.28412	4.53463	7.33535	5.92556e-07	0.000130362	6.31901	Up
AREG	1.53619	4.82412	7.31496	6.16555e-07	0.00013435	6.28006	Up
RGS2	1.77287	12.6855	7.30542	6.28124e-07	0.00013558	6.26183	Up
PLAU	2.64721	5.65213	7.2577	6.89479e-07	0.000147433	6.17038	Up
CREB5	1.14957	5.05569	7.17734	8.07198e-07	0.000167897	6.01565	Up
GPR183	2.31187	8.556	7.16432	8.28137e-07	0.000170701	5.99051	Up
PPP1R15B	1.10149	10.2665	7.03934	1.06029e-06	0.000214685	5.74778	Up
RGS1	1.66952	3.98572	7.02371	1.09375e-06	0.000219517	5.71725	Up
DCUN1D3	1.62177	6.91787	6.99893	1.14901e-06	0.000225935	5.6688	Up
KLF6	1.05899	7.79965	6.99617	1.15535e-06	0.000225935	5.6634	Up
MIR22	1.31836	12.1753	6.89076	1.4263e-06	0.000274233	5.45628	Up
JUN	1.65987	8.89518	6.77519	1.8e-06	0.000337574	5.22739	Up
LDLR	1.32592	4.57113	6.68225	2.17329e-06	0.000401008	5.04193	Up
DUSP2	3.88481	6.97015	6.67299	2.21461e-06	0.000405361	5.0234	Up
B3GNT5	1.26102	3.63006	6.66815	2.23653e-06	0.000406125	5.0137	Up
RPS16P5	2.83274	6.11727	6.63973	2.36989e-06	0.000426953	4.95668	Up
MIR6732	1.58262	5.26918	6.6237	2.44866e-06	0.000437699	4.92449	Up
ARL5B	1.514	7.2587	6.61909	2.47182e-06	0.000438413	4.91522	Up
KDM7A	1.64451	7.19956	6.5254	2.99487e-06	0.000515207	4.72621	Up
UAP1	1.32517	11.1565	6.49233	3.20567e-06	0.000547356	4.65921	Up
PPP1R15A	2.03471	6.84529	6.4266	3.67134e-06	0.000622224	4.5256	Up
BTG2	2.95032	7.75732	6.41628	3.75051e-06	0.000630967	4.50458	Up
IL1RL1	2.31636	3.69325	6.40969	3.80208e-06	0.000634975	4.49112	Up
SERPINE1	2.7685	5.26947	6.39403	3.92735e-06	0.000651041	4.45918	Up
FANCF	-1.01564	5.69091	-6.39063	3.95519e-06	0.000651041	4.45222	Down
EIF4A1	1.25377	10.2524	6.33665	4.42415e-06	0.000723033	4.34181	Up
HMOX1	3.3908	7.82017	6.21235	5.73502e-06	0.000911231	4.08602	Up
HES1	1.23507	6.00782	6.20188	5.86235e-06	0.000925038	4.06437	Up
REL	1.16694	5.59955	6.19135	5.99329e-06	0.000939222	4.04259	Up
EMP1	1.60044	7.27689	6.17306	6.22791e-06	0.00096935	4.00473	Up
ERRFI1	2.21937	10.4408	6.1586	6.42015e-06	0.000985859	3.97476	Up
TFPI2	3.52587	7.0157	6.10059	7.25458e-06	0.00110657	3.85428	Up
GCH1	2.75393	8.62809	6.08451	7.50512e-06	0.00112972	3.8208	Up
PPRC1	1.69292	8.0775	6.0788	7.59612e-06	0.00113594	3.80892	Up
RP6-99M1.2	1.47337	4.28325	6.07167	7.71151e-06	0.00114571	3.79405	Up
SLC20A1	1.71533	7.28816	6.05533	7.98259e-06	0.00117833	3.75999	Up
PHLDA1	1.42248	6.84788	6.03314	8.36654e-06	0.00122709	3.71366	Up
SGK1	2.47185	11.1331	6.01051	8.77788e-06	0.00127922	3.66633	Up
DUSP1	1.02455	5.92842	5.96159	9.73926e-06	0.00141034	3.56383	Up
KDM6B	2.11959	4.25872	5.94694	1.00477e-05	0.00144586	3.53308	Up
RP11-469M7.1	1.63908	7.10854	5.91927	1.06582e-05	0.00152412	3.47491	Up
BAZ1A	1.55342	7.32388	5.90479	1.09925e-05	0.00155253	3.44445	Up
OTUD1	1.2118	6.25006	5.81993	1.31815e-05	0.00185027	3.26533	Up
MB21D2	1.40856	8.13833	5.78956	1.40696e-05	0.00195098	3.20103	Up
GRHL1	1.49943	3.96118	5.74669	1.54289e-05	0.00210127	3.11006	Up
WARS	1.03238	9.25511	5.71037	1.66857e-05	0.00223256	3.03282	Up
INSIG1	1.48246	9.21655	5.67256	1.81059e-05	0.00239459	2.95225	Up
ITPKC	1.88576	7.66523	5.62461	2.00869e-05	0.00262622	2.84984	Up
PIGA	1.53063	7.61046	5.61655	2.04414e-05	0.00264236	2.83259	Up
FADD	-1.31622	5.79961	-5.58094	2.20843e-05	0.00282284	2.75634	Down
CA2	2.0237	6.67449	5.56283	2.29716e-05	0.00290381	2.71749	Up
TIPARP	1.29195	11.9665	5.53611	2.43472e-05	0.00304626	2.66014	Up
LOC285556	5.45487	8.04796	5.53578	2.43648e-05	0.00304626	2.65943	Up
SOX17	1.70863	5.60651	5.51486	2.55013e-05	0.00317103	2.61446	Up
SOX7	2.02583	7.03614	5.49177	2.68191e-05	0.00325257	2.56478	Up
KLHL15	1.33127	9.32721	5.49094	2.68678e-05	0.00325257	2.56299	Up
TNFRSF12A	2.6039	9.23336	5.32635	3.85432e-05	0.0045224	2.20719	Up
SPRY4-IT1	1.56662	3.65809	5.29706	4.11122e-05	0.00477486	2.14359	Up
HAS1	3.5847	9.29851	5.24679	4.59362e-05	0.00519713	2.03423	Up
LRRC32	1.24477	8.14135	5.23361	4.72934e-05	0.0052734	2.00553	Up
SOCS2	1.04509	5.30592	5.21746	4.9013e-05	0.00536563	1.97034	Up
RDH10	1.00965	5.53353	5.21323	4.94744e-05	0.00539035	1.9611	Up
NXT1	1.43386	7.52494	5.20538	5.03414e-05	0.00543307	1.94398	Up
GLA	1.15211	9.42729	5.16186	5.54373e-05	0.00589956	1.84897	Up
DISP1	-1.50427	6.06665	-5.14907	5.70332e-05	0.0060413	1.82101	Down
MESDC1	1.10822	4.46284	5.13764	5.8499e-05	0.00612643	1.79601	Up
KCNT2	-2.07139	6.27058	-5.12957	5.95565e-05	0.00613807	1.77836	Down
BIRC3	1.46068	6.67283	5.1178	6.11351e-05	0.00627251	1.75259	Up
C8orf4	1.25678	10.1639	5.07565	6.71427e-05	0.0066528	1.66026	Up
HSPA6	2.71713	5.84278	5.05588	7.01659e-05	0.00689011	1.61688	Up
ISG20	2.01204	5.08231	5.03708	7.31671e-05	0.00715412	1.57563	Up
DNAJB1	1.9579	9.39288	5.01476	7.69027e-05	0.00742288	1.5266	Up
CD93	1.01251	9.03384	4.96592	8.57688e-05	0.00807568	1.41918	Up
TMEM2	1.8463	7.32006	4.90266	9.88176e-05	0.00911672	1.27979	Up
IER5	1.07901	11.3398	4.89774	9.99133e-05	0.00918079	1.26894	Up
PPP1R18	1.69456	5.21056	4.86756	0.000106912	0.00969777	1.20233	Up
CKS2	1.7102	6.99145	4.82533	0.000117547	0.0104649	1.10904	Up
BHLHE40	1.79922	7.29832	4.81683	0.000119815	0.0105844	1.09024	Up
PRR15	-2.66863	4.52577	-4.81262	0.000120955	0.010644	1.08093	Down
EPHA2	1.66034	7.60002	4.77451	0.000131784	0.0114647	0.996609	Up
C17orf96	1.11387	5.63581	4.75357	0.000138149	0.0118829	0.95024	Up
STEAP4	1.21855	6.75524	4.70857	0.000152901	0.0129256	0.850514	Up
DUSP6	1.34171	9.18602	4.67974	0.000163184	0.0137266	0.786561	Up
KBTBD6	-1.07346	7.93069	-4.65951	0.000170812	0.0142116	0.741675	Down
INHBA	2.18698	7.37402	4.62831	0.000183298	0.0151402	0.672385	Up
ARL4C	1.12844	4.06965	4.61532	0.000188764	0.01548	0.643528	Up
FST	1.96659	5.8013	4.60803	0.000191902	0.015623	0.627336	Up
METRNL	1.14341	9.52022	4.60298	0.000194108	0.015638	0.616113	Up
KCNE4	1.77547	3.74805	4.59174	0.000199109	0.0158181	0.591141	Up
PRR15L	-2.51273	3.56944	-4.58789	0.000200853	0.0159015	0.582575	Down
AK025288	1.64489	7.41984	4.53841	0.000224682	0.0175024	0.472539	Up
LMCD1	1.37255	5.48105	4.53648	0.000225665	0.0175024	0.468255	Up
NFKBIZ	1.63604	10.0504	4.52963	0.000229198	0.0177164	0.453012	Up
FJX1	1.36698	6.44997	4.4929	0.000249117	0.0186947	0.371256	Up
ABRA	1.86812	9.43804	4.48986	0.000250842	0.0186947	0.364485	Up
TNFAIP2	1.02546	5.15521	4.47169	0.000261403	0.0191083	0.32404	Up
VPS37B	1.02305	7.3226	4.44959	0.000274864	0.0198633	0.274808	Up
MLKL	1.15244	7.18346	4.43794	0.000282233	0.0203066	0.248869	Up
CYP1B1	1.32404	8.2437	4.42976	0.000287534	0.0205111	0.230631	Up
NINL	-1.18184	5.96527	-4.4294	0.000287765	0.0205111	0.229842	Down
PPL	-1.31966	6.17764	-4.4142	0.000297884	0.0211664	0.195968	Down
ZNF285	-1.02473	7.61436	-4.40497	0.0003042	0.0215483	0.175408	Down
KIAA0040	1.29739	6.15416	4.39587	0.000310564	0.0218637	0.155119	Up
MST1	-1.99247	5.374	-4.39277	0.000312757	0.0219506	0.148224	Down
PHF13	1.02611	9.78935	4.3739	0.000326482	0.0227404	0.106148	Up
SPRY4	1.68587	6.83722	4.37188	0.000327987	0.0227404	0.101644	Up
CLDN15	-1.4916	4.19239	-4.35411	0.00034152	0.0232559	0.0620424	Down
MT2A	1.12361	11.7922	4.35232	0.000342911	0.0232813	0.0580601	Up
SGMS2	2.05174	7.84681	4.33932	0.000353214	0.0238394	0.0290709	Up
CCL3	1.95727	3.95737	4.32976	0.000360988	0.0240675	0.00775532	Up
RAB15	2.21504	7.34293	4.31894	0.000369996	0.0244668	-0.016374	Up
CCRL2	1.10437	4.05826	4.29167	0.00039371	0.025664	-0.0771792	Up
GADD45G	1.65671	9.14002	4.26473	0.000418641	0.0270579	-0.137256	Up
MGARP	-1.62101	8.19245	-4.26205	0.000421208	0.0271471	-0.143235	Down
NABP1	1.9009	7.63847	4.25412	0.00042889	0.0274874	-0.160917	Up
SLPI	-3.28726	9.05199	-4.1811	0.000506614	0.0309928	-0.323745	Down
IL4R	1.24076	8.33997	4.17892	0.00050914	0.0310643	-0.328605	Up
LONRF3	1.03215	4.05205	4.17131	0.000518058	0.0315244	-0.345573	Up
LINC01133	-1.3604	4.10394	-4.14046	0.000555853	0.033293	-0.414357	Down
IL1B	3.33903	5.51942	4.12662	0.000573695	0.03393	-0.445209	Up
EGR4	1.11436	3.87284	4.12397	0.000577176	0.03393	-0.451115	Up
CKMT1A	-2.4096	5.48657	-4.12215	0.000579575	0.03393	-0.455165	Down
PDIK1L	-1.02506	7.77988	-4.09986	0.000609843	0.0354142	-0.504858	Down
BNC2	-1.22658	4.99199	-4.06415	0.000661659	0.0378469	-0.584429	Down
TNFRSF1B	1.02669	7.95185	4.03019	0.000715025	0.0399995	-0.660074	Up
DMKN	-1.27809	5.66045	-4.02591	0.000722051	0.0401959	-0.669606	Down
GFPT2	2.17043	9.16921	4.01612	0.000738378	0.0408252	-0.691403	Up
KLK11	-2.45086	5.67225	-4.00376	0.000759525	0.0416737	-0.718923	Down
C21orf62	-1.95371	3.90959	-4.0021	0.000762403	0.0417315	-0.722609	Down
DGKD	1.23557	8.51682	3.98999	0.000783798	0.0424011	-0.749575	Up
MIR155	1.79456	3.96095	3.98094	0.000800166	0.0428754	-0.76971	Up
UPK3B	-1.89062	6.71902	-3.97823	0.00080514	0.0429557	-0.775747	Down
CSF3	1.10935	5.17088	3.97808	0.00080542	0.0429557	-0.776085	Up
ZSWIM6	1.0683	8.30317	3.97159	0.000817441	0.0432941	-0.790515	Up
LIMS3	1.51456	6.6077	3.94445	0.000869731	0.044764	-0.850893	Up
PLLP	-2.72637	6.76167	-3.91294	0.000934643	0.0468157	-0.920947	Down
ITPRIP	1.14009	6.54479	3.90724	0.00094688	0.0471996	-0.933601	Up

## Sheet: DE-MTRGs
gene	Sig
MAFF	Up
MCL1	Up
SLC25A25	Up
DDX21	Up
RGS2	Up
PPP1R15A	Up
SGK1	Up
CYP1B1	Up
PPL	Down
MGARP	Down
CKMT1A	Down
