# Supplementary material for: Identification of mitochondria-related genes associated with anesthetics in patients undergoing off-pump coronary artery bypass grafting surgery
Source: Front Surg. 2025 Jul 9;12:1515732. doi: 10.3389/fsurg.2025.1515732 (PMC12283725; doi:10.3389/fsurg.2025.1515732)
Supplement: Supplementary Table S3 — The results of GO and KEGG functional analysis. [file Table3.xlsx]

## Sheet: GSE4386_S_go_result
ONTOLOGY	ID	Description	GeneRatio	BgRatio	pvalue	qvalue	geneID	Count
BP	GO:0032496	response to lipopolysaccharide	37/485	348/18870	2.68292e-13	5.73901e-10	ZFP36/IL6/SELE/ARID5A/NR4A1/SLC7A5/CCL2/CXCL2/MIR21/FOSL2/FOS/TNFAIP3/SLPI/CXCL1/CXCL8/THBD/SERPINE1/PTGS2/CD274/CXCL3/CSF3/NFKBIZ/C2/CLDN1/GCH1/IL1B/PCK2/CX3CR1/TRIM6/PDE4B/MIR17/PELI1/NFKB1/PYCARD/FMO1/PCK1/AKAP12	37
BP	GO:0002237	response to molecule of bacterial origin	38/485	369/18870	3.4474e-13	5.73901e-10	ZFP36/IL6/SELE/ARID5A/NR4A1/SLC7A5/CCL2/CXCL2/MIR21/FOSL2/FOS/TNFAIP3/SLPI/CXCL1/CXCL8/THBD/SERPINE1/PTGS2/CD274/CXCL3/CSF3/NFKBIZ/C2/CLDN1/GCH1/IL1B/PCK2/CX3CR1/TRIM6/PDE4B/MIR17/PELI1/NFKB1/PYCARD/FMO1/PCK1/AKAP12/C5AR1	38
BP	GO:0001819	positive regulation of cytokine production	43/485	499/18870	4.0523e-12	4.49734e-09	IL6/NR4A3/ARID5A/SLC7A5/EGR1/PNP/IL18/MIR21/C3/THBS1/IRF1/BCL3/SERPINE1/PTGS2/CD274/SPHK1/IL1RL1/RNF135/CD83/TNFRSF8/SULF1/IL1B/CYP1B1/FADD/DDX21/IL4R/PANX1/TRIM6/OAS1/HMOX1/BTN3A2/PDE4B/MIR17/ARRDC4/EREG/PELI1/TLR5/CSF1R/PYCARD/IL7/AKAP12/IL1RAP/C5AR1	43
BP	GO:0034612	response to tumor necrosis factor	28/485	259/18870	1.55262e-10	1.29235e-07	ZFP36/SELE/CCL2/HAS2/FOS/TNFAIP3/THBS1/CXCL8/PTGS2/SPHK1/CALCA/TRAF5/BIRC3/CLDN1/GCH1/PCK2/CYP1B1/CX3CR1/CCL11/CCL8/KRT18/CCL7/CCL20/NFKB1/PYCARD/PCK1/CEBPA/AKAP12	28
BP	GO:0031960	response to corticosteroid	21/485	149/18870	2.44489e-10	1.62804e-07	ZFP36/CDKN1A/IL6/FOSB/FOSL1/BCHE/FOSL2/AREG/FOS/IL1RN/PTGS2/STC1/AQP1/SGK1/CLDN1/PCK2/CYP1B1/INHBA/FAM107A/ANXA3/PCK1	21
BP	GO:0051384	response to glucocorticoid	19/485	127/18870	6.25586e-10	3.47145e-07	ZFP36/CDKN1A/IL6/FOSB/FOSL1/BCHE/FOSL2/AREG/FOS/IL1RN/PTGS2/STC1/AQP1/CLDN1/PCK2/CYP1B1/FAM107A/ANXA3/PCK1	19
MF	GO:0005126	cytokine receptor binding	28/489	273/18496	9.84645e-10	6.13589e-07	IL6/CCL2/LIF/IL18/CXCL2/IL1RN/CXCL1/CXCL8/CXCL3/CSF3/ITGA5/TRAF5/SOCS2/IL1B/CX3CR1/FADD/CCL11/CCL8/CCL7/CCL20/CLCF1/VEGFA/TLR5/PYCARD/IL7/OSMR/IL1RAP/LRG1	28
BP	GO:0060326	cell chemotaxis	30/485	325/18870	1.6024e-09	7.62166e-07	IL6/CH25H/NR4A1/CCL2/HBEGF/CXCL2/EGR3/DPP4/GPR183/CXCL1/THBS1/TNFAIP6/CXCL8/SERPINE1/CXCL3/CALCA/IL1B/EPHA2/CX3CR1/KDR/DUSP1/CCL11/CCL8/CCL7/CCL20/PDE4B/ACKR4/VEGFA/CSF1R/C5AR1	30
BP	GO:0071356	cellular response to tumor necrosis factor	25/485	238/18870	2.75393e-09	1.14614e-06	ZFP36/CCL2/HAS2/FOS/TNFAIP3/THBS1/CXCL8/SPHK1/CALCA/TRAF5/BIRC3/CLDN1/PCK2/CYP1B1/CX3CR1/CCL11/CCL8/KRT18/CCL7/CCL20/NFKB1/PYCARD/PCK1/CEBPA/AKAP12	25
BP	GO:0071347	cellular response to interleukin-1	17/485	111/18870	3.47629e-09	1.28602e-06	IL6/EGR1/CCL2/HAS2/MIR21/IL1RN/CXCL8/IL1B/CCL11/CCL8/CCL7/CCL20/NFKB1/PYCARD/PCK1/AKAP12/IL1RAP	17
BP	GO:0042060	wound healing	34/485	423/18870	4.71419e-09	1.56958e-06	CDKN1A/IL6/GPR4/HBEGF/TNFAIP3/ANXA8/THBS1/TNFRSF12A/THBD/SERPINE1/AQP1/ALOX15/TFPI2/PROCR/ITGA5/PPL/DGKD/CLDN1/PLAUR/FZD7/KDR/RAB27A/UBASH3B/F5/HMOX1/PLAU/MIR17/EREG/SERPING1/SDC4/VEGFA/COL3A1/SERPINB2/LRG1	34
BP	GO:0006935	chemotaxis	36/485	468/18870	5.25984e-09	1.59205e-06	IL6/CH25H/NR4A1/CCL2/FOSL1/HBEGF/FLRT3/CXCL2/EGR3/DPP4/GPR183/CXCL1/THBS1/TNFAIP6/CXCL8/SERPINE1/CXCL3/CALCA/FLRT2/BMP4/IL1B/PLAUR/EPHA2/CX3CR1/KDR/DUSP1/CCL11/CCL8/CCL7/CCL20/PDE4B/PLAU/ACKR4/VEGFA/CSF1R/C5AR1	36
BP	GO:0042330	taxis	36/485	470/18870	5.88345e-09	1.6324e-06	IL6/CH25H/NR4A1/CCL2/FOSL1/HBEGF/FLRT3/CXCL2/EGR3/DPP4/GPR183/CXCL1/THBS1/TNFAIP6/CXCL8/SERPINE1/CXCL3/CALCA/FLRT2/BMP4/IL1B/PLAUR/EPHA2/CX3CR1/KDR/DUSP1/CCL11/CCL8/CCL7/CCL20/PDE4B/PLAU/ACKR4/VEGFA/CSF1R/C5AR1	36
BP	GO:0071248	cellular response to metal ion	22/485	200/18870	1.06663e-08	2.73179e-06	FOSB/JUNB/ITPKC/FOS/JUN/PTGS2/AQP1/ALOX15/SYT4/MT2A/KCNB1/CLDN1/MT1M/MT1HL1/SYT17/ZNF658/MT1H/FBP1/MT1X/HMOX1/CEBPA/CPNE2	22
BP	GO:0050729	positive regulation of inflammatory response	19/485	152/18870	1.34073e-08	3.18851e-06	IL6/GPR4/IL18/MIR21/C3/SERPINE1/PTGS2/IL1RL1/MIR22/NFKBIZ/LDLR/IL1B/VAMP8/PLA2G2A/LGALS2/ETS1/PYCARD/OSMR/CEBPA	19
BP	GO:0030595	leukocyte chemotaxis	24/485	240/18870	1.51165e-08	3.35532e-06	IL6/CH25H/CCL2/CXCL2/DPP4/GPR183/CXCL1/THBS1/TNFAIP6/CXCL8/SERPINE1/CXCL3/CALCA/IL1B/CX3CR1/DUSP1/CCL11/CCL8/CCL7/CCL20/PDE4B/VEGFA/CSF1R/C5AR1	24
BP	GO:0050727	regulation of inflammatory response	33/485	425/18870	1.85806e-08	3.86647e-06	ZFP36/SOCS3/IL6/SELE/GPR4/IL18/MIR21/TNFAIP3/IER3/C3/TNFAIP6/SERPINE1/FBXL2/PTGS2/ALOX15/KLF4/SPHK1/IL1RL1/MIR22/NFKBIZ/LDLR/BIRC3/METRNL/IL1B/VAMP8/PLA2G2A/LGALS2/NLRC3/ETS1/NFKB1/PYCARD/OSMR/CEBPA	33
MF	GO:0005125	cytokine activity	24/489	237/18496	2.01539e-08	6.27952e-06	IL6/CCL2/LIF/IL18/CXCL2/AREG/IL1RN/CXCL1/CXCL8/NAMPT/CXCL3/CSF3/BMP4/IL1B/CCL11/INHBA/CCL8/CCL7/CCL20/WNT2B/CLCF1/VEGFA/IL7/BMP2	24
BP	GO:0070555	response to interleukin-1	18/485	140/18870	2.0705e-08	4.0551e-06	IL6/SELE/EGR1/CCL2/HAS2/MIR21/IL1RN/CXCL8/IL1B/CCL11/CCL8/CCL7/CCL20/NFKB1/PYCARD/PCK1/AKAP12/IL1RAP	18
BP	GO:0071241	cellular response to inorganic substance	23/485	229/18870	2.78628e-08	5.15381e-06	FOSB/JUNB/SPIDR/ITPKC/FOS/JUN/PTGS2/AQP1/ALOX15/SYT4/MT2A/KCNB1/CLDN1/MT1M/MT1HL1/SYT17/ZNF658/MT1H/FBP1/MT1X/HMOX1/CEBPA/CPNE2	23
BP	GO:0045765	regulation of angiogenesis	29/485	349/18870	3.18517e-08	5.54784e-06	IL6/GPR4/MIR21/TNFAIP3/C3/ADAMTS9/THBS1/ADAMTS1/CXCL8/SERPINE1/AQP1/KLF4/SPHK1/ITGA5/GADD45A/SULF1/IL1B/EPHA2/CYP1B1/CX3CR1/KDR/AGO2/HMOX1/MIR17/ANXA3/VEGFA/ETS1/C5AR1/LRG1	29
BP	GO:0031349	positive regulation of defense response	35/485	480/18870	3.33256e-08	5.54784e-06	IL6/FOSL1/GPR4/IL18/MIR21/TNFAIP3/C3/IRF1/SERPINE1/FBXL2/PTGS2/IL1RL1/MIR22/NFKBIZ/RNF135/LDLR/BIRC3/IL1B/VAMP8/FADD/PLA2G2A/TRIM6/OAS1/LGALS2/NLRC3/MIR17/EREG/PELI1/TRIL/ETS1/TLR5/PYCARD/OSMR/CEBPA/COLEC12	35
BP	GO:1901342	regulation of vasculature development	29/485	354/18870	4.34674e-08	6.8916e-06	IL6/GPR4/MIR21/TNFAIP3/C3/ADAMTS9/THBS1/ADAMTS1/CXCL8/SERPINE1/AQP1/KLF4/SPHK1/ITGA5/GADD45A/SULF1/IL1B/EPHA2/CYP1B1/CX3CR1/KDR/AGO2/HMOX1/MIR17/ANXA3/VEGFA/ETS1/C5AR1/LRG1	29
BP	GO:0032642	regulation of chemokine production	15/485	104/18870	6.66374e-08	9.25122e-06	IL6/EGR1/IL18/KLF4/IL1RL1/IL1B/EPHA2/IL4R/OAS1/HMOX1/ACKR1/MIR17/CSF1R/PYCARD/IL7	15
BP	GO:0045766	positive regulation of angiogenesis	20/485	185/18870	6.6686e-08	9.25122e-06	MIR21/C3/THBS1/CXCL8/SERPINE1/AQP1/KLF4/SPHK1/ITGA5/IL1B/CYP1B1/CX3CR1/KDR/AGO2/HMOX1/ANXA3/VEGFA/ETS1/C5AR1/LRG1	20
BP	GO:1904018	positive regulation of vasculature development	20/485	185/18870	6.6686e-08	9.25122e-06	MIR21/C3/THBS1/CXCL8/SERPINE1/AQP1/KLF4/SPHK1/ITGA5/IL1B/CYP1B1/CX3CR1/KDR/AGO2/HMOX1/ANXA3/VEGFA/ETS1/C5AR1/LRG1	20
BP	GO:0032602	chemokine production	15/485	105/18870	7.5936e-08	1.01131e-05	IL6/EGR1/IL18/KLF4/IL1RL1/IL1B/EPHA2/IL4R/OAS1/HMOX1/ACKR1/MIR17/CSF1R/PYCARD/IL7	15
BP	GO:0097191	extrinsic apoptotic signaling pathway	22/485	229/18870	1.23232e-07	1.57807e-05	ATF3/ITPRIP/ICAM1/TNFAIP3/THBS1/TNFRSF12A/SERPINE1/NFKBIZ/MCL1/BMP4/IL1B/FADD/DAPK1/INHBA/KRT18/BOK/HMOX1/TNFRSF10B/BCL2A1/PYCARD/IL7/GCLM	22
BP	GO:0007159	leukocyte cell-cell adhesion	31/485	419/18870	1.49888e-07	1.84833e-05	IL6/NR4A3/SELE/EFNB3/CCL2/PNP/IL18/EGR3/HAS2/MIR21/DPP4/ICAM1/IRF1/CD274/KLF4/ITGA5/NFKBIZ/CD83/BMP4/IL1B/CX3CR1/FADD/IL4R/PLA2G2A/PELI1/SDC4/ETS1/PYCARD/IL7/PCK1/LRG1	31
BP	GO:0070371	ERK1 and ERK2 cascade	27/485	336/18870	1.88544e-07	2.24197e-05	MYC/ATF3/CCL2/DUSP5/LIF/MIR21/ICAM1/GPR183/ALOX15/BMP4/IL1B/EPHA2/KDR/PLA2G2A/CCL11/INHBA/DUSP6/CCL8/CCL7/CCL20/PDGFC/MARCO/CSF1R/PYCARD/AKAP12/C5AR1/BMP2	27
BP	GO:0048661	positive regulation of smooth muscle cell proliferation	14/485	98/18870	2.06447e-07	2.37021e-05	IL6/NR4A3/IL18/HBEGF/MIR21/THBS1/ADAMTS1/JUN/PTGS2/BMP4/LDLRAP1/HMOX1/MIR17/EREG	14
BP	GO:0071621	granulocyte chemotaxis	16/485	130/18870	2.33458e-07	2.59098e-05	CCL2/CXCL2/DPP4/CXCL1/THBS1/TNFAIP6/CXCL8/CXCL3/IL1B/CCL11/CCL8/CCL7/CCL20/PDE4B/CSF1R/C5AR1	16
BP	GO:0043616	keratinocyte proliferation	11/485	59/18870	2.65353e-07	2.84996e-05	ZFP36/CDKN1A/HAS2/MIR21/TGM1/AREG/NFKBIZ/FST/CDH3/EREG/LRG1	11
BP	GO:0097529	myeloid leukocyte migration	22/485	242/18870	3.23081e-07	3.26392e-05	IL6/CCL2/CXCL2/DPP4/CXCL1/THBS1/TNFAIP6/CXCL8/SERPINE1/CXCL3/CALCA/IL1B/CX3CR1/DUSP1/CCL11/CCL8/CCL7/CCL20/PDE4B/VEGFA/CSF1R/C5AR1	22
BP	GO:0050673	epithelial cell proliferation	33/485	480/18870	3.23502e-07	3.26392e-05	ZFP36/CDKN1A/IL6/NR4A3/MYC/NR4A1/CCL2/EGR3/HAS2/MIR21/TGM1/AREG/TNFAIP3/THBS1/MIR22/NFKBIZ/SULF1/BMP4/CLDN1/EPHA2/OSR1/FZD7/KDR/SERPINB1/CCL11/FST/HMOX1/CDH3/NLRC3/EREG/VEGFA/C5AR1/LRG1	33
BP	GO:0071222	cellular response to lipopolysaccharide	21/485	226/18870	4.16565e-07	4.07924e-05	ZFP36/IL6/ARID5A/SLC7A5/CCL2/CXCL2/MIR21/TNFAIP3/CXCL1/CXCL8/SERPINE1/CD274/CXCL3/CSF3/NFKBIZ/IL1B/CX3CR1/PDE4B/MIR17/NFKB1/PYCARD	21
BP	GO:0048660	regulation of smooth muscle cell proliferation	18/485	171/18870	4.51276e-07	4.29289e-05	CDKN1A/IL6/NR4A3/IL18/HBEGF/MIR21/TNFAIP3/THBS1/ADAMTS1/JUN/PTGS2/BMP4/LDLRAP1/HMOX1/MIR17/EREG/CNN1/BMP2	18
BP	GO:0050900	leukocyte migration	29/485	396/18870	4.69713e-07	4.34415e-05	IL6/SELE/CH25H/CCL2/CXCL2/DPP4/ICAM1/GPR183/CXCL1/THBS1/TNFAIP6/CXCL8/SERPINE1/CXCL3/CALCA/IL1B/CX3CR1/FADD/DUSP1/CCL11/CCL8/CCL7/CCL20/HMOX1/PDE4B/VEGFA/CSF1R/PYCARD/C5AR1	29
MF	GO:0001216	DNA-binding transcription activator activity	33/489	475/18496	4.7887e-07	9.94706e-05	MAFF/CSRNP1/FOSB/NR4A3/CEBPD/JUNB/MYC/ATF3/NR4A1/EGR1/NR4A2/FOSL1/BNC1/EGR3/SOX17/FOSL2/FOS/EGR2/IRF1/JUN/GRHL1/KLF4/HOXB2/REL/KLF10/EGR4/MEOX2/ZNF658/TEAD4/KLF6/ETS1/NFKB1/CEBPA	33
BP	GO:0045444	fat cell differentiation	22/485	248/18870	4.9217e-07	4.42883e-05	ZFP36/IL6/NR4A3/CEBPD/NR4A1/NR4A2/RGS2/MIR21/FOSL2/EGR2/PIM1/PTGS2/KLF4/ADIRF/METRNL/ASXL1/INSIG1/MIR17/CEBPA/STEAP4/LRG1/BMP2	22
BP	GO:0022407	regulation of cell-cell adhesion	33/485	493/18870	5.91138e-07	5.13455e-05	IL6/NR4A3/SELE/EFNB3/CCL2/PNP/IL18/EGR3/HAS2/MIR21/DPP4/IL1RN/IRF1/CD274/KLF4/NFKBIZ/CD83/BMP4/IL1B/PLAUR/FADD/IL4R/UBASH3B/PLA2G2A/PELI1/FSTL3/SDC4/VEGFA/ETS1/PYCARD/IL7/PCK1/BMP2	33
BP	GO:0070372	regulation of ERK1 and ERK2 cascade	25/485	313/18870	6.01438e-07	5.13455e-05	ATF3/CCL2/LIF/MIR21/ICAM1/GPR183/ALOX15/BMP4/IL1B/EPHA2/KDR/PLA2G2A/CCL11/INHBA/DUSP6/CCL8/CCL7/CCL20/PDGFC/MARCO/CSF1R/PYCARD/AKAP12/C5AR1/BMP2	25
BP	GO:0030593	neutrophil chemotaxis	14/485	107/18870	6.23212e-07	5.1673e-05	CCL2/CXCL2/DPP4/CXCL1/TNFAIP6/CXCL8/CXCL3/IL1B/CCL11/CCL8/CCL7/CCL20/PDE4B/C5AR1	14
BP	GO:0048659	smooth muscle cell proliferation	18/485	175/18870	6.36314e-07	5.1673e-05	CDKN1A/IL6/NR4A3/IL18/HBEGF/MIR21/TNFAIP3/THBS1/ADAMTS1/JUN/PTGS2/BMP4/LDLRAP1/HMOX1/MIR17/EREG/CNN1/BMP2	18
MF	GO:0070851	growth factor receptor binding	16/489	138/18496	7.71195e-07	0.000120144	IL6/HBEGF/FLRT3/AREG/IL1RN/CSF3/ITGA5/FLRT2/IL1B/EREG/PDGFC/VEGFA/TLR5/PYCARD/IL7/IL1RAP	16
BP	GO:0051090	regulation of DNA-binding transcription factor activity	29/485	406/18870	7.83592e-07	6.21178e-05	IL6/SIK1/IL18/LPAR5/MIR21/TNFAIP3/PIM1/ABRA/BCL3/CSF3/KLF4/SPHK1/PPRC1/TRAF5/SGK1/BHLHE40/IL1B/ANXA4/CYP1B1/CX3CR1/TRIM6/TRIM68/HMOX1/NLRC3/ANXA3/PYCARD/ADORA3/IL1RAP/BMP2	29
BP	GO:1900745	positive regulation of p38MAPK cascade	8/485	31/18870	8.42816e-07	6.5259e-05	GADD45B/SPHK1/GADD45G/GADD45A/BMP4/IL1B/VEGFA/BMP2	8
BP	GO:0140467	integrated stress response signaling	9/485	42/18870	9.53074e-07	6.94939e-05	CEBPD/JUNB/FOSL1/FOS/JUN/PPP1R15A/PPP1R15B/BOK/CEBPA	9
BP	GO:0050679	positive regulation of epithelial cell proliferation	20/485	218/18870	9.60128e-07	6.94939e-05	NR4A3/MYC/NR4A1/EGR3/HAS2/MIR21/TGM1/AREG/TNFAIP3/BMP4/CLDN1/OSR1/FZD7/KDR/CCL11/HMOX1/CDH3/VEGFA/C5AR1/LRG1	20
BP	GO:0070374	positive regulation of ERK1 and ERK2 cascade	20/485	218/18870	9.60128e-07	6.94939e-05	CCL2/MIR21/ICAM1/GPR183/ALOX15/BMP4/KDR/PLA2G2A/CCL11/INHBA/CCL8/CCL7/CCL20/PDGFC/MARCO/CSF1R/PYCARD/AKAP12/C5AR1/BMP2	20
BP	GO:1903131	mononuclear cell differentiation	32/485	481/18870	1.00349e-06	7.10868e-05	SOCS3/IL6/JUNB/MYC/EGR1/PNP/IL18/NFIL3/EGR3/MIR21/FOSL2/FOS/GPR183/IRF1/BLNK/BCL3/NFKBIZ/CD83/BMP4/IL1B/FZD7/FADD/IL4R/INHBA/KLF6/DOCK11/CLCF1/IL15RA/VEGFA/CSF1R/IL7/PCK1	32
BP	GO:0071219	cellular response to molecule of bacterial origin	21/485	239/18870	1.04523e-06	7.25017e-05	ZFP36/IL6/ARID5A/SLC7A5/CCL2/CXCL2/MIR21/TNFAIP3/CXCL1/CXCL8/SERPINE1/CD274/CXCL3/CSF3/NFKBIZ/IL1B/CX3CR1/PDE4B/MIR17/NFKB1/PYCARD	21
BP	GO:0010838	positive regulation of keratinocyte proliferation	6/485	15/18870	1.14874e-06	7.80551e-05	HAS2/MIR21/TGM1/AREG/CDH3/LRG1	6
MF	GO:0001228	DNA-binding transcription activator activity, RNA polymerase II-specific	32/489	471/18496	1.16257e-06	0.000144893	MAFF/CSRNP1/FOSB/NR4A3/CEBPD/JUNB/MYC/ATF3/NR4A1/EGR1/NR4A2/FOSL1/EGR3/SOX17/FOSL2/FOS/EGR2/IRF1/JUN/GRHL1/KLF4/HOXB2/REL/KLF10/EGR4/MEOX2/ZNF658/TEAD4/KLF6/ETS1/NFKB1/CEBPA	32
BP	GO:1990868	response to chemokine	13/485	99/18870	1.5038e-06	9.64407e-05	CCL2/CXCL2/CXCL1/CXCL8/CXCL3/CX3CR1/DUSP1/CCL11/CCL8/CCL7/CCL20/ACKR1/ACKR4	13
BP	GO:1990869	cellular response to chemokine	13/485	99/18870	1.5038e-06	9.64407e-05	CCL2/CXCL2/CXCL1/CXCL8/CXCL3/CX3CR1/DUSP1/CCL11/CCL8/CCL7/CCL20/ACKR1/ACKR4	13
BP	GO:0071216	cellular response to biotic stimulus	22/485	265/18870	1.50622e-06	9.64407e-05	ZFP36/IL6/ARID5A/SLC7A5/CCL2/CXCL2/MIR21/TNFAIP3/CXCL1/CXCL8/SERPINE1/CD274/CXCL3/CSF3/NFKBIZ/PPP1R15B/IL1B/CX3CR1/PDE4B/MIR17/NFKB1/PYCARD	22
BP	GO:0048545	response to steroid hormone	25/485	330/18870	1.58683e-06	9.96849e-05	ZFP36/CDKN1A/IL6/FOSB/NR4A3/FOSL1/BCHE/FOSL2/AREG/FOS/IL1RN/THBS1/PTGS2/STC1/AQP1/SGK1/CLDN1/PCK2/CYP1B1/MGARP/INHBA/TRIM68/FAM107A/ANXA3/PCK1	25
BP	GO:0044703	multi-organism reproductive process	19/485	206/18870	1.65357e-06	0.000101496	MAFF/FOSB/JUNB/TAC1/FOSL1/LIF/VMP1/RGS2/MIR21/FOS/THBD/PTGS2/STC1/CALCA/ITGA5/IL1B/TEAD4/AGO2/VEGFA	19
BP	GO:0038066	p38MAPK cascade	10/485	57/18870	1.67662e-06	0.000101496	ZFP36/GADD45B/SPHK1/GADD45G/GADD45A/BMP4/IL1B/DUSP1/VEGFA/BMP2	10
BP	GO:1900744	regulation of p38MAPK cascade	9/485	45/18870	1.76882e-06	0.000103929	GADD45B/SPHK1/GADD45G/GADD45A/BMP4/IL1B/DUSP1/VEGFA/BMP2	9
BP	GO:0033002	muscle cell proliferation	21/485	247/18870	1.77924e-06	0.000103929	CDKN1A/IL6/NR4A3/IL18/HBEGF/MIR21/FOS/TNFAIP3/PIM1/THBS1/ADAMTS1/JUN/PTGS2/BMP4/LDLRAP1/RBP4/HMOX1/MIR17/EREG/CNN1/BMP2	21
BP	GO:0002696	positive regulation of leukocyte activation	27/485	380/18870	2.08506e-06	0.000117699	CDKN1A/IL6/NR4A3/EFNB3/CCL2/PNP/IL18/EGR3/MIR21/DPP4/GPR183/THBS1/CD274/IL1RL1/NFKBIZ/CD83/IL1B/VAMP8/FADD/IL4R/PELI1/CLCF1/IL15RA/PYCARD/IL7/PCK1/CEBPA	27
BP	GO:0043410	positive regulation of MAPK cascade	31/485	474/18870	2.12016e-06	0.000117699	IL6/GADD45B/CCL2/LIF/MIR21/ICAM1/GPR183/THBS1/ALOX15/SPHK1/BCAR3/GADD45G/GADD45A/BMP4/IL1B/FZD7/KDR/PLA2G2A/CCL11/INHBA/CCL8/CCL7/CCL20/PDGFC/MARCO/VEGFA/CSF1R/PYCARD/AKAP12/C5AR1/BMP2	31
BP	GO:0032722	positive regulation of chemokine production	11/485	72/18870	2.12104e-06	0.000117699	IL6/EGR1/IL18/IL1RL1/IL1B/IL4R/OAS1/HMOX1/CSF1R/PYCARD/IL7	11
BP	GO:1903037	regulation of leukocyte cell-cell adhesion	27/485	382/18870	2.30259e-06	0.000125679	IL6/NR4A3/SELE/EFNB3/CCL2/PNP/IL18/EGR3/HAS2/MIR21/DPP4/IRF1/CD274/KLF4/NFKBIZ/CD83/BMP4/IL1B/FADD/IL4R/PLA2G2A/PELI1/SDC4/ETS1/PYCARD/IL7/PCK1	27
BP	GO:0007566	embryo implantation	10/485	60/18870	2.73226e-06	0.000143746	LIF/VMP1/MIR21/PTGS2/STC1/CALCA/IL1B/TEAD4/AGO2/VEGFA	10
BP	GO:0043086	negative regulation of catalytic activity	31/485	480/18870	2.74952e-06	0.000143746	ZFP36/CDKN1A/GPRC5A/RGS2/MIR21/PTX3/ANXA8/HP/THBS1/SERPINE1/AQP1/KLF4/PPP1R15A/GADD45A/ERRFI1/IL1B/PLAUR/DUSP1/SERPINB1/UBASH3B/IFIT1/MIR17/GLA/SERPING1/VEGFA/NFKB1/PYCARD/SERPINB2/CEBPA/SERPINA3/BMP2	31
BP	GO:0097530	granulocyte migration	16/485	156/18870	2.76313e-06	0.000143746	CCL2/CXCL2/DPP4/CXCL1/THBS1/TNFAIP6/CXCL8/CXCL3/IL1B/CCL11/CCL8/CCL7/CCL20/PDE4B/CSF1R/C5AR1	16
BP	GO:0002573	myeloid leukocyte differentiation	20/485	235/18870	3.0818e-06	0.000157858	JUNB/MYC/LIF/FOSL2/FOS/GPR183/TNFAIP6/CSF3/IL1RL1/KLF10/BMP4/EPHA2/FADD/UBASH3B/INHBA/FSTL3/VEGFA/CSF1R/CEBPA/BMP2	20
BP	GO:2001236	regulation of extrinsic apoptotic signaling pathway	16/485	158/18870	3.26604e-06	0.000164761	ATF3/ITPRIP/ICAM1/TNFAIP3/THBS1/TNFRSF12A/SERPINE1/MCL1/BMP4/IL1B/FADD/INHBA/HMOX1/PYCARD/IL7/GCLM	16
BP	GO:0044706	multi-multicellular organism process	19/485	216/18870	3.34668e-06	0.000166309	MAFF/FOSB/JUNB/TAC1/FOSL1/LIF/VMP1/RGS2/MIR21/FOS/THBD/PTGS2/STC1/CALCA/ITGA5/IL1B/TEAD4/AGO2/VEGFA	19
BP	GO:0071276	cellular response to cadmium ion	8/485	37/18870	3.60204e-06	0.000175276	FOS/JUN/MT2A/MT1M/MT1HL1/MT1H/MT1X/HMOX1	8
BP	GO:0070098	chemokine-mediated signaling pathway	12/485	91/18870	3.63241e-06	0.000175276	CCL2/CXCL2/CXCL1/CXCL8/CXCL3/CX3CR1/CCL11/CCL8/CCL7/CCL20/ACKR1/ACKR4	12
BP	GO:0071496	cellular response to external stimulus	25/485	346/18870	3.70372e-06	0.000176163	CDKN1A/ATF3/SLC7A5/NR4A2/FOSL1/FOS/PIM1/IRF1/PTGS2/AQP1/KCNB1/TNFRSF8/GADD45A/KLF10/IL1B/MN1/FADD/TNFRSF10B/FAM107A/UPP1/WNT2B/TLR5/NFKB1/PCK1/PDK4	25
BP	GO:0042730	fibrinolysis	7/485	27/18870	4.03323e-06	0.000189134	THBS1/THBD/SERPINE1/PLAUR/PLAU/SERPING1/SERPINB2	7
BP	GO:0050867	positive regulation of cell activation	27/485	396/18870	4.51293e-06	0.00020869	CDKN1A/IL6/NR4A3/EFNB3/CCL2/PNP/IL18/EGR3/MIR21/DPP4/GPR183/THBS1/CD274/IL1RL1/NFKBIZ/CD83/IL1B/VAMP8/FADD/IL4R/PELI1/CLCF1/IL15RA/PYCARD/IL7/PCK1/CEBPA	27
MF	GO:0008009	chemokine activity	9/489	49/18496	4.70287e-06	0.000488439	CCL2/CXCL2/CXCL1/CXCL8/CXCL3/CCL11/CCL8/CCL7/CCL20	9
BP	GO:1990266	neutrophil migration	14/485	129/18870	5.97302e-06	0.000272425	CCL2/CXCL2/DPP4/CXCL1/TNFAIP6/CXCL8/CXCL3/IL1B/CCL11/CCL8/CCL7/CCL20/PDE4B/C5AR1	14
BP	GO:0050819	negative regulation of coagulation	9/485	52/18870	6.26072e-06	0.000281688	THBS1/THBD/SERPINE1/PROCR/PLAUR/UBASH3B/PLAU/SERPING1/SERPINB2	9
BP	GO:0007565	female pregnancy	17/485	186/18870	6.55854e-06	0.000291153	FOSB/JUNB/FOSL1/LIF/VMP1/RGS2/MIR21/FOS/THBD/PTGS2/STC1/CALCA/ITGA5/IL1B/TEAD4/AGO2/VEGFA	17
BP	GO:0030098	lymphocyte differentiation	28/485	429/18870	6.87544e-06	0.000298981	SOCS3/IL6/JUNB/EGR1/PNP/IL18/NFIL3/EGR3/MIR21/FOSL2/GPR183/IRF1/BLNK/BCL3/NFKBIZ/CD83/BMP4/IL1B/FZD7/FADD/IL4R/INHBA/KLF6/DOCK11/CLCF1/IL15RA/IL7/PCK1	28
BP	GO:0030100	regulation of endocytosis	22/485	291/18870	6.91853e-06	0.000298981	SELE/CCL2/PTX3/C3/SERPINE1/ALOX15/SPHK1/SYT4/WDR54/C2/ARC/RAB17/DGKD/IL1B/RSPO1/LDLRAP1/RAB27A/MIR17/C4A/IL15RA/VEGFA/PYCARD	22
BP	GO:0010038	response to metal ion	25/485	359/18870	7.0674e-06	0.000298981	FOSB/JUNB/ITPKC/FOS/THBS1/JUN/PTGS2/AQP1/ALOX15/SYT4/MT2A/KCNB1/CRIP1/CLDN1/MT1M/MT1HL1/ATP7B/SYT17/ZNF658/MT1H/FBP1/MT1X/HMOX1/CEBPA/CPNE2	25
BP	GO:0071674	mononuclear cell migration	18/485	207/18870	7.09407e-06	0.000298981	IL6/CH25H/CCL2/ICAM1/GPR183/THBS1/SERPINE1/CALCA/CX3CR1/FADD/DUSP1/CCL11/CCL8/CCL7/CCL20/CSF1R/PYCARD/C5AR1	18
BP	GO:0048146	positive regulation of fibroblast proliferation	9/485	53/18870	7.37155e-06	0.000306792	CDKN1A/MYC/LIF/FOSL2/AQP1/SPHK1/MIR17/EREG/PDGFC	9
BP	GO:0050678	regulation of epithelial cell proliferation	27/485	407/18870	7.46489e-06	0.000306841	ZFP36/NR4A3/MYC/NR4A1/CCL2/EGR3/HAS2/MIR21/TGM1/AREG/TNFAIP3/THBS1/MIR22/SULF1/BMP4/CLDN1/OSR1/FZD7/KDR/CCL11/HMOX1/CDH3/NLRC3/EREG/VEGFA/C5AR1/LRG1	27
BP	GO:0045785	positive regulation of cell adhesion	30/485	482/18870	8.25374e-06	0.000334658	IL6/NR4A3/SELE/EFNB3/CCL2/PNP/LIF/IL18/EGR3/HAS2/MIR21/DPP4/CD274/ALOX15/ITGA5/NFKBIZ/CD83/IL1B/PLAUR/FADD/KDR/IL4R/CCDC80/FSTL3/SDC4/VEGFA/ETS1/PYCARD/IL7/PCK1	30
BP	GO:0002685	regulation of leukocyte migration	19/485	230/18870	8.34265e-06	0.000334658	IL6/SELE/CCL2/DPP4/ICAM1/THBS1/TNFAIP6/CXCL8/SERPINE1/CX3CR1/FADD/DUSP1/CCL7/CCL20/HMOX1/VEGFA/CSF1R/PYCARD/C5AR1	19
BP	GO:0010575	positive regulation of vascular endothelial growth factor production	7/485	30/18870	8.6487e-06	0.000342805	IL6/C3/PTGS2/SULF1/IL1B/CYP1B1/C5AR1	7
BP	GO:1903039	positive regulation of leukocyte cell-cell adhesion	21/485	275/18870	9.57621e-06	0.000375103	IL6/NR4A3/SELE/EFNB3/CCL2/PNP/IL18/EGR3/HAS2/MIR21/DPP4/CD274/NFKBIZ/CD83/IL1B/FADD/IL4R/ETS1/PYCARD/IL7/PCK1	21
BP	GO:0050764	regulation of phagocytosis	12/485	100/18870	9.81427e-06	0.000379958	CCL2/PTX3/C3/ALOX15/SPHK1/C2/IL1B/RAB27A/MIR17/C4A/IL15RA/PYCARD	12
BP	GO:0019058	viral life cycle	23/485	321/18870	1.03609e-05	0.000396509	CH25H/EFNB3/CCL2/DPP4/ICAM1/PTX3/SLPI/CXCL8/FBXL2/ITGA5/LDLR/VPS37B/CLDN1/LY6E/EPHA2/VAMP8/TRIM6/IFIT1/OAS1/CCL8/ISG20/TRIM68/KPNA2	23
BP	GO:0022409	positive regulation of cell-cell adhesion	23/485	322/18870	1.08963e-05	0.000412262	IL6/NR4A3/SELE/EFNB3/CCL2/PNP/IL18/EGR3/HAS2/MIR21/DPP4/CD274/NFKBIZ/CD83/IL1B/PLAUR/FADD/IL4R/FSTL3/ETS1/PYCARD/IL7/PCK1	23
BP	GO:0045807	positive regulation of endocytosis	15/485	155/18870	1.14733e-05	0.000429216	SELE/CCL2/PTX3/C3/SERPINE1/C2/DGKD/IL1B/LDLRAP1/RAB27A/MIR17/C4A/IL15RA/VEGFA/PYCARD	15
BP	GO:0002548	monocyte chemotaxis	10/485	71/18870	1.30004e-05	0.000480937	IL6/CCL2/SERPINE1/CALCA/CX3CR1/DUSP1/CCL11/CCL8/CCL7/CCL20	10
BP	GO:0050766	positive regulation of phagocytosis	10/485	72/18870	1.47551e-05	0.000533986	CCL2/PTX3/C3/C2/IL1B/RAB27A/MIR17/C4A/IL15RA/PYCARD	10
BP	GO:0071260	cellular response to mechanical stimulus	10/485	72/18870	1.47551e-05	0.000533986	IRF1/PTGS2/AQP1/TNFRSF8/GADD45A/IL1B/FADD/TNFRSF10B/TLR5/NFKB1	10
BP	GO:0030213	hyaluronan biosynthetic process	5/485	14/18870	1.81547e-05	0.000644389	HAS2/IL1B/HAS1/CEMIP/NFKB1	5
BP	GO:2001234	negative regulation of apoptotic signaling pathway	19/485	243/18870	1.81928e-05	0.000644389	NR4A2/ITPRIP/MIR21/ICAM1/TNFAIP3/IER3/THBS1/SERPINE1/PTGS2/MCL1/BMP4/IL1B/PLAUR/CX3CR1/BOK/HMOX1/MIR17/IL7/GCLM	19
BP	GO:0046632	alpha-beta T cell differentiation	13/485	124/18870	1.86263e-05	0.000652798	SOCS3/IL6/JUNB/PNP/IL18/MIR21/FOSL2/GPR183/IRF1/BCL3/NFKBIZ/CD83/IL4R	13
BP	GO:0052548	regulation of endopeptidase activity	21/485	288/18870	1.92548e-05	0.000667796	MYC/MIR21/ANXA8/THBS1/SERPINE1/AQP1/KLF4/BIRC3/PLAUR/FADD/DAPK1/SERPINB1/EGLN3/SOX7/BOK/MIR17/SERPING1/VEGFA/PYCARD/SERPINB2/SERPINA3	21
BP	GO:0048144	fibroblast proliferation	12/485	107/18870	1.96911e-05	0.000675885	CDKN1A/MYC/LIF/FOSL2/AQP1/SPHK1/CKS2/NLRC3/MIR17/EREG/PDGFC/COL3A1	12
BP	GO:0016032	viral process	27/485	432/18870	2.17046e-05	0.000737398	ZFP36/CH25H/EFNB3/CCL2/DPP4/ICAM1/PTX3/SLPI/CHD1/JUN/CXCL8/FBXL2/ITGA5/LDLR/VPS37B/CLDN1/LY6E/EPHA2/VAMP8/TRIM6/IFIT1/OAS1/CCL8/ISG20/TRIM68/CSF1R/KPNA2	27
BP	GO:0002688	regulation of leukocyte chemotaxis	13/485	126/18870	2.21261e-05	0.000744124	IL6/CCL2/DPP4/THBS1/TNFAIP6/CXCL8/SERPINE1/CX3CR1/DUSP1/CCL7/VEGFA/CSF1R/C5AR1	13
MF	GO:0042379	chemokine receptor binding	10/489	74/18496	2.40148e-05	0.00213786	CCL2/CXCL2/CXCL1/CXCL8/CXCL3/CX3CR1/CCL11/CCL8/CCL7/CCL20	10
BP	GO:0046683	response to organophosphorus	13/485	127/18870	2.40826e-05	0.000801823	FOSB/FOSL1/AREG/FOS/THBD/PTGS2/STC1/AQP1/IL1B/CYP1B1/PANX1/FBP1/PCK1	13
BP	GO:0071294	cellular response to zinc ion	6/485	24/18870	2.53703e-05	0.000836334	MT2A/MT1M/MT1HL1/ZNF658/MT1H/MT1X	6
BP	GO:0001704	formation of primary germ layer	13/485	128/18870	2.61888e-05	0.000854851	DUSP5/DUSP2/SOX17/KLF4/ITGA5/ETS2/KDM6B/BMP4/EPHA2/FZD7/DUSP1/INHBA/SOX7	13
BP	GO:0030195	negative regulation of blood coagulation	8/485	48/18870	2.7477e-05	0.000883107	THBS1/THBD/SERPINE1/PLAUR/UBASH3B/PLAU/SERPING1/SERPINB2	8
BP	GO:0050878	regulation of body fluid levels	24/485	365/18870	2.75849e-05	0.000883107	IL6/HAS2/FOSL2/ANXA8/THBS1/THBD/SERPINE1/AQP1/TFPI2/PROCR/SOCS2/DGKD/PLAUR/ATP7B/VAMP8/RAB27A/UBASH3B/F5/MYO5B/PLAU/SERPING1/VEGFA/COL3A1/SERPINB2	24
BP	GO:0002819	regulation of adaptive immune response	17/485	208/18870	2.83738e-05	0.000899714	IL6/ARID5A/JUNB/IL18/MIR21/TNFAIP3/C3/IRF1/CD274/ALOX15/IL1RL1/NFKBIZ/IL1B/FADD/IL4R/CLCF1/PYCARD	17
BP	GO:0002687	positive regulation of leukocyte migration	14/485	149/18870	3.11669e-05	0.000978958	IL6/SELE/ICAM1/THBS1/CXCL8/SERPINE1/CX3CR1/FADD/CCL7/CCL20/VEGFA/CSF1R/PYCARD/C5AR1	14
BP	GO:1902105	regulation of leukocyte differentiation	22/485	321/18870	3.18121e-05	0.000980758	JUNB/MYC/PNP/LIF/IL18/EGR3/MIR21/FOS/TNFAIP6/IRF1/NFKBIZ/CD83/KLF10/BMP4/FADD/IL4R/UBASH3B/INHBA/FSTL3/IL15RA/IL7/PCK1	22
BP	GO:1903706	regulation of hemopoiesis	26/485	417/18870	3.20399e-05	0.000980758	ZFP36/JUNB/MYC/PNP/LIF/IL18/EGR3/MIR21/FOS/TNFAIP6/IRF1/CSF3/NFKBIZ/CD83/KLF10/BMP4/FADD/IL4R/UBASH3B/INHBA/FSTL3/IL15RA/ETS1/IL7/PCK1/CEBPA	26
BP	GO:1900047	negative regulation of hemostasis	8/485	49/18870	3.2108e-05	0.000980758	THBS1/THBD/SERPINE1/PLAUR/UBASH3B/PLAU/SERPING1/SERPINB2	8
BP	GO:0044403	biological process involved in symbiotic interaction	22/485	322/18870	3.33459e-05	0.00100931	CH25H/EFNB3/DPP4/ICAM1/PTX3/CHD1/JUN/CXCL8/FBXL2/ITGA5/LDLR/VPS37B/CLDN1/LY6E/EPHA2/VAMP8/CX3CR1/TRIM6/IFIT1/CCL8/TRIM68/CSF1R	22
BP	GO:0002040	sprouting angiogenesis	16/485	190/18870	3.37493e-05	0.00101232	NR4A1/EGR3/MIR21/ADAMTS9/THBS1/PTGS2/KLF4/MIR22/ITGA5/BMP4/EPHA2/KDR/MEOX2/HMOX1/MIR17/VEGFA	16
MF	GO:0001664	G protein-coupled receptor binding	21/489	291/18496	3.38413e-05	0.00263606	CCL2/TAC1/CXCL2/CXCL1/C3/CXCL8/REEP1/CXCL3/CALCA/RSPO1/RTP4/FZD7/NMU/CX3CR1/GNAI1/CCL11/CCL8/CCL7/CCL20/WNT2B/MARCO	21
BP	GO:0030225	macrophage differentiation	9/485	64/18870	3.56736e-05	0.0010511	LIF/FOSL2/IL1RL1/BMP4/FADD/INHBA/VEGFA/CSF1R/CEBPA	9
BP	GO:2000630	positive regulation of miRNA metabolic process	9/485	64/18870	3.56736e-05	0.0010511	MYC/EGR1/FOSL1/FOS/JUN/KLF4/ETS1/NFKB1/BMP2	9
BP	GO:0046688	response to copper ion	7/485	37/18870	3.74362e-05	0.00108947	AQP1/MT2A/MT1M/MT1HL1/ATP7B/MT1H/MT1X	7
BP	GO:0010273	detoxification of copper ion	5/485	16/18870	3.79576e-05	0.00108947	MT2A/MT1M/MT1HL1/MT1H/MT1X	5
BP	GO:1990169	stress response to copper ion	5/485	16/18870	3.79576e-05	0.00108947	MT2A/MT1M/MT1HL1/MT1H/MT1X	5
BP	GO:0001667	ameboidal-type cell migration	29/485	497/18870	3.83661e-05	0.00109179	NR4A1/HBEGF/EGR3/SOX17/HAS2/MIR21/DPP4/ADAMTS9/THBS1/PTGS2/STC1/AQP1/KLF4/MIR22/GADD45A/BMP4/EPHA2/CYP1B1/KDR/MEOX2/HAS1/AGO2/HMOX1/ANXA3/SDC4/VEGFA/ETS1/AKAP12/LRG1	29
BP	GO:2001233	regulation of apoptotic signaling pathway	25/485	398/18870	4.01752e-05	0.00113358	MYC/ATF3/NR4A2/ITPRIP/MIR21/ICAM1/TNFAIP3/IER3/THBS1/TNFRSF12A/SERPINE1/PTGS2/MCL1/BMP4/IL1B/PLAUR/CX3CR1/FADD/INHBA/BOK/HMOX1/MIR17/PYCARD/IL7/GCLM	25
BP	GO:0071280	cellular response to copper ion	6/485	26/18870	4.1543e-05	0.00114135	AQP1/MT2A/MT1M/MT1HL1/MT1H/MT1X	6
BP	GO:0006959	humoral immune response	19/485	258/18870	4.16038e-05	0.00114135	IL6/CCL2/CXCL2/GPR183/SLPI/CXCL1/C3/BLNK/CXCL8/BCL3/CXCL3/C2/CD83/CFB/IL1B/CFI/SERPING1/C4A/IL7	19
BP	GO:0009636	response to toxic substance	19/485	258/18870	4.16038e-05	0.00114135	CDKN1A/MIR21/FOS/HP/PIM1/PTGS2/PTGS1/MT2A/KDM6B/CLDN1/GCH1/MT1M/MT1HL1/ATP7B/CYP1B1/INMT/MT1H/MT1X/GPX8	19
BP	GO:0002720	positive regulation of cytokine production involved in immune response	10/485	81/18870	4.20623e-05	0.00114135	IL6/NR4A3/ARID5A/SLC7A5/IL18/IL1B/DDX21/PANX1/TRIM6/PYCARD	10
BP	GO:1903034	regulation of response to wounding	15/485	173/18870	4.21648e-05	0.00114135	HBEGF/MIR21/TNFAIP3/PTPRF/THBS1/TNFRSF12A/THBD/SERPINE1/KLF4/CLDN1/PLAUR/UBASH3B/PLAU/SERPING1/SERPINB2	15
BP	GO:2001237	negative regulation of extrinsic apoptotic signaling pathway	11/485	99/18870	4.74534e-05	0.00127415	ITPRIP/ICAM1/TNFAIP3/THBS1/SERPINE1/MCL1/BMP4/IL1B/HMOX1/IL7/GCLM	11
BP	GO:0051251	positive regulation of lymphocyte activation	22/485	330/18870	4.82129e-05	0.00128419	CDKN1A/IL6/EFNB3/CCL2/PNP/IL18/EGR3/MIR21/DPP4/GPR183/CD274/NFKBIZ/CD83/IL1B/FADD/IL4R/PELI1/CLCF1/IL15RA/PYCARD/IL7/PCK1	22
BP	GO:0030217	T cell differentiation	21/485	307/18870	4.92667e-05	0.00130184	SOCS3/IL6/JUNB/EGR1/PNP/IL18/EGR3/MIR21/FOSL2/GPR183/IRF1/BCL3/NFKBIZ/CD83/BMP4/IL1B/FZD7/FADD/IL4R/IL7/PCK1	21
BP	GO:0002702	positive regulation of production of molecular mediator of immune response	13/485	136/18870	4.96897e-05	0.00130268	IL6/NR4A3/ARID5A/SLC7A5/IL18/IL1B/DDX21/IL4R/PANX1/RBP4/TRIM6/CLCF1/PYCARD	13
BP	GO:1902895	positive regulation of miRNA transcription	8/485	52/18870	5.00837e-05	0.00130275	MYC/EGR1/FOSL1/FOS/JUN/KLF4/ETS1/BMP2	8
BP	GO:0007369	gastrulation	16/485	197/18870	5.2321e-05	0.00132776	NR4A3/DUSP5/DUSP2/SOX17/IL1RN/KLF4/ITGA5/ETS2/KDM6B/BMP4/EPHA2/OSR1/FZD7/DUSP1/INHBA/SOX7	16
BP	GO:0002460	adaptive immune response based on somatic recombination of immune receptors built from immunoglobulin superfamily domains	24/485	380/18870	5.24169e-05	0.00132776	SOCS3/IL6/ARID5A/JUNB/IL18/MIR21/ICAM1/TNFAIP3/C3/BCL3/CD274/IL1RL1/NFKBIZ/C2/BTN3A3/IL1B/FADD/IL4R/CFI/RAB27A/BTN3A2/CLCF1/SERPING1/C4A	24
BP	GO:0097396	response to interleukin-17	5/485	17/18870	5.26404e-05	0.00132776	SOCS3/TRAF5/NFKBIZ/IL1B/NFKB1	5
BP	GO:0097398	cellular response to interleukin-17	5/485	17/18870	5.26404e-05	0.00132776	SOCS3/TRAF5/NFKBIZ/IL1B/NFKB1	5
BP	GO:0043434	response to peptide hormone	26/485	430/18870	5.35692e-05	0.00134103	SOCS3/NR4A3/BTG2/NR4A1/EGR1/NR4A2/AREG/FOS/EGR2/PTGS2/BCAR3/SOCS2/IL1B/PCK2/CYP1B1/MGARP/GNAI1/CA2/FBP1/INHBA/INSIG1/EREG/NFKB1/COL3A1/PCK1/PDK4	26
BP	GO:0032609	type II interferon production	12/485	119/18870	5.70958e-05	0.00139896	ARID5A/SLC7A5/IL18/BCL3/CD274/IL1RL1/IL1B/FADD/INHBA/BTN3A2/PDE4B/PYCARD	12
BP	GO:0032649	regulation of type II interferon production	12/485	119/18870	5.70958e-05	0.00139896	ARID5A/SLC7A5/IL18/BCL3/CD274/IL1RL1/IL1B/FADD/INHBA/BTN3A2/PDE4B/PYCARD	12
BP	GO:0042542	response to hydrogen peroxide	11/485	101/18870	5.71439e-05	0.00139896	IL6/FOSL1/AREG/TNFAIP3/HP/AQP1/SPHK1/PPP1R15B/KDM6B/CYP1B1/HMOX1	11
BP	GO:0002292	T cell differentiation involved in immune response	10/485	84/18870	5.77272e-05	0.00140293	SOCS3/IL6/JUNB/IL18/MIR21/GPR183/BCL3/NFKBIZ/IL4R/PCK1	10
BP	GO:0052547	regulation of peptidase activity	21/485	312/18870	6.21636e-05	0.00149531	MYC/MIR21/ANXA8/THBS1/SERPINE1/AQP1/KLF4/BIRC3/PLAUR/FADD/DAPK1/SERPINB1/EGLN3/SOX7/BOK/MIR17/SERPING1/VEGFA/PYCARD/SERPINB2/SERPINA3	21
BP	GO:0009410	response to xenobiotic stimulus	26/485	434/18870	6.24266e-05	0.00149531	CDKN1A/FOSB/MYC/FOSL1/PNP/BCHE/FOSL2/FOS/AADAC/SLC28A3/THBS1/PTGS2/NFKBIZ/BCAR3/AOX1/GSTA4/IL1B/CYP1B1/TGIF1/FBP1/DUSP6/CDH3/PDE4B/CD69/FMO1/GCLM	26
BP	GO:0051591	response to cAMP	10/485	85/18870	6.39455e-05	0.00152075	FOSB/FOSL1/AREG/FOS/THBD/STC1/AQP1/CYP1B1/FBP1/PCK1	10
BP	GO:0070663	regulation of leukocyte proliferation	19/485	267/18870	6.60831e-05	0.00156044	CDKN1A/IL6/PNP/IL18/MIR21/TNFAIP3/GPR183/IRF1/CD274/BMP4/IL1B/FADD/PLA2G2A/PELI1/CLCF1/SDC4/CSF1R/PYCARD/IL7	19
BP	GO:0008625	extrinsic apoptotic signaling pathway via death domain receptors	10/485	86/18870	7.07243e-05	0.00164668	ATF3/ITPRIP/ICAM1/TNFAIP3/THBS1/SERPINE1/FADD/DAPK1/HMOX1/TNFRSF10B	10
BP	GO:2000628	regulation of miRNA metabolic process	10/485	86/18870	7.07243e-05	0.00164668	MYC/EGR1/FOSL1/FOS/JUN/KLF4/BMP4/ETS1/NFKB1/BMP2	10
BP	GO:0051917	regulation of fibrinolysis	5/485	18/18870	7.13522e-05	0.00164976	THBS1/THBD/SERPINE1/PLAUR/PLAU	5
BP	GO:1902893	regulation of miRNA transcription	9/485	70/18870	7.35165e-05	0.00168808	MYC/EGR1/FOSL1/FOS/JUN/KLF4/BMP4/ETS1/BMP2	9
BP	GO:0002697	regulation of immune effector process	24/485	389/18870	7.55774e-05	0.00172351	IL6/NR4A3/ARID5A/JUNB/SLC7A5/IL18/MIR21/ICAM1/C3/NFKBIZ/IL1B/VAMP8/CX3CR1/FADD/DDX21/IL4R/PANX1/RBP4/TRIM6/CLCF1/SERPING1/TRIL/PYCARD/PCK1	24
MF	GO:0140297	DNA-binding transcription factor binding	28/489	477/18496	7.61065e-05	0.00449426	NR4A3/SIK1/ARID5A/MYC/NR4A1/NR4A2/SOX17/FOS/EGR2/JUN/BCL3/CREM/KLF4/BHLHE40/RERG/ETS2/ANXA4/ASXL1/ZBTB8A/TDG/FBP1/TRIM6/TRIM68/RBBP8/DACT1/GMNN/ETS1/CEBPA	28
BP	GO:0002699	positive regulation of immune effector process	19/485	270/18870	7.6704e-05	0.00173731	IL6/NR4A3/ARID5A/SLC7A5/IL18/MIR21/C3/NFKBIZ/IL1B/VAMP8/FADD/DDX21/IL4R/PANX1/RBP4/TRIM6/CLCF1/PYCARD/PCK1	19
BP	GO:0002286	T cell activation involved in immune response	12/485	123/18870	7.89058e-05	0.0017751	SOCS3/IL6/JUNB/IL18/MIR21/ICAM1/GPR183/BCL3/NFKBIZ/IL4R/RAB27A/PCK1	12
BP	GO:2000425	regulation of apoptotic cell clearance	4/485	10/18870	8.00323e-05	0.00178836	CCL2/C3/C2/C4A	4
BP	GO:0010586	miRNA metabolic process	11/485	105/18870	8.17028e-05	0.00179098	MYC/EGR1/FOSL1/FOS/JUN/KLF4/BMP4/AGO2/ETS1/NFKB1/BMP2	11
BP	GO:0042698	ovulation cycle	9/485	71/18870	8.23011e-05	0.00179098	EGR1/HAS2/CA12/PTX3/TNFAIP6/ADAMTS1/CYP1B1/INHBA/EREG	9
BP	GO:0045600	positive regulation of fat cell differentiation	9/485	71/18870	8.23011e-05	0.00179098	ZFP36/MIR21/PIM1/PTGS2/ADIRF/METRNL/MIR17/CEBPA/BMP2	9
BP	GO:0061614	miRNA transcription	9/485	71/18870	8.23011e-05	0.00179098	MYC/EGR1/FOSL1/FOS/JUN/KLF4/BMP4/ETS1/BMP2	9
BP	GO:0014074	response to purine-containing compound	13/485	143/18870	8.35634e-05	0.00179472	FOSB/FOSL1/AREG/FOS/THBD/PTGS2/STC1/AQP1/IL1B/CYP1B1/PANX1/FBP1/PCK1	13
BP	GO:0044409	entry into host	14/485	163/18870	8.35922e-05	0.00179472	CH25H/EFNB3/DPP4/ICAM1/PTX3/CXCL8/ITGA5/LDLR/CLDN1/LY6E/EPHA2/VAMP8/TRIM6/TRIM68	14
BP	GO:0000302	response to reactive oxygen species	16/485	205/18870	8.40902e-05	0.00179472	IL6/FOSL1/MIR21/AREG/FOS/TNFAIP3/HP/JUN/AQP1/SPHK1/PPP1R15B/KDM6B/GCH1/CYP1B1/HMOX1/MIR17	16
BP	GO:0070482	response to oxygen levels	22/485	343/18870	8.52615e-05	0.00180813	CDKN1A/MYC/SLC7A5/EGR1/NR4A2/LIF/MIR21/DPP4/FOSL2/FOS/THBS1/PTGS2/STC1/AQP1/MGARP/EGLN3/HMOX1/PLAU/MIR17/VEGFA/PCK1/BMP2	22
CC	GO:0062023	collagen-containing extracellular matrix	25/497	429/19886	8.67029e-05	0.0182011	SBSPON/ICAM1/ANXA8/SLPI/MST1/ADAMTS9/THBS1/ADAMTS1/SERPINE1/PRG4/HTRA1/SULF1/ANXA4/SERPINB1/CCDC80/ANXA9/WNT2B/SERPING1/MARCO/COL1A2/ADAMTS8/IL7/COL3A1/SERPINA3/COLEC12	25
MF	GO:0005525	GTP binding	24/489	382/18496	8.7811e-05	0.00449426	RND1/RAB27B/RAB15/GEM/RND3/RASD1/RERG/RAB17/ATL1/ARL5B/GCH1/SCG5/PCK2/DAPK1/NOLC1/GNAI1/RAB27A/GIMAP1/GIMAP2/ARL4C/GIMAP7/ARL13B/PCK1/RAB38	24
BP	GO:0031667	response to nutrient levels	28/485	495/18870	8.89372e-05	0.00186558	ZFP36/CDKN1A/ATF3/SLC7A5/SLC25A25/BCHE/FOS/PIM1/PTGS2/STC1/NFKBIZ/KCNB1/C2/LDLR/KLF10/PCK2/CYP1B1/MN1/CHSY1/FBP1/F5/FAM107A/UPP1/WNT2B/IL15RA/GCLM/PCK1/PDK4	28
BP	GO:0030316	osteoclast differentiation	11/485	106/18870	8.90914e-05	0.00186558	JUNB/FOSL2/FOS/GPR183/TNFAIP6/KLF10/EPHA2/UBASH3B/FSTL3/CSF1R/BMP2	11
MF	GO:0008330	protein tyrosine/threonine phosphatase activity	4/489	10/18496	8.92906e-05	0.00449426	DUSP5/DUSP2/DUSP1/DUSP6	4
MF	GO:0033550	MAP kinase tyrosine phosphatase activity	4/489	10/18496	8.92906e-05	0.00449426	DUSP5/DUSP2/DUSP1/DUSP6	4
BP	GO:0001503	ossification	26/485	444/18870	9.0597e-05	0.00187354	IL6/CEBPD/JUNB/MIR21/FOSL2/AREG/EGR2/TNFAIP6/PTGS2/STC1/ALOX15/CALCA/SGMS2/SLC24A3/KLF10/BMP4/EPHA2/MN1/OSR1/DDX21/CHSY1/MIR17/FSTL3/COL1A2/CEBPA/BMP2	26
BP	GO:0010720	positive regulation of cell development	26/485	444/18870	9.0597e-05	0.00187354	IL6/MYRF/SLC7A5/LRP2/BNC1/PNP/LIF/IL18/EGR3/MIR21/FOS/EGR2/NFKBIZ/CD83/KLF10/BMP4/IL1B/CX3CR1/FADD/IL4R/CLCF1/IL15RA/VEGFA/IL7/PCK1/BMP2	26
BP	GO:0014015	positive regulation of gliogenesis	9/485	72/18870	9.19506e-05	0.0018898	IL6/MYRF/SLC7A5/LRP2/LIF/EGR2/IL1B/CLCF1/BMP2	9
MF	GO:0001968	fibronectin binding	6/489	29/18496	9.37569e-05	0.00449426	THBS1/TNFAIP6/CCDC80/FSTL3/SDC4/VEGFA	6
BP	GO:0048145	regulation of fibroblast proliferation	10/485	89/18870	9.48382e-05	0.00193719	CDKN1A/MYC/LIF/FOSL2/AQP1/SPHK1/NLRC3/MIR17/EREG/PDGFC	10
BP	GO:0001666	response to hypoxia	20/485	298/18870	9.62065e-05	0.00194374	MYC/EGR1/NR4A2/LIF/MIR21/DPP4/FOSL2/FOS/THBS1/PTGS2/STC1/AQP1/MGARP/EGLN3/HMOX1/PLAU/MIR17/VEGFA/PCK1/BMP2	20
BP	GO:0050671	positive regulation of lymphocyte proliferation	13/485	145/18870	9.63264e-05	0.00194374	CDKN1A/IL6/PNP/IL18/MIR21/GPR183/CD274/IL1B/FADD/PELI1/CLCF1/PYCARD/IL7	13
BP	GO:0070665	positive regulation of leukocyte proliferation	14/485	166/18870	0.000101706	0.002032	CDKN1A/IL6/PNP/IL18/MIR21/GPR183/CD274/IL1B/FADD/PELI1/CLCF1/CSF1R/PYCARD/IL7	14
BP	GO:0042093	T-helper cell differentiation	9/485	73/18870	0.000102531	0.002032	SOCS3/IL6/JUNB/IL18/MIR21/GPR183/BCL3/NFKBIZ/IL4R	9
BP	GO:0050818	regulation of coagulation	9/485	73/18870	0.000102531	0.002032	THBS1/THBD/SERPINE1/PROCR/PLAUR/UBASH3B/PLAU/SERPING1/SERPINB2	9
MF	GO:0008083	growth factor activity	14/489	162/18496	0.000105178	0.0046816	IL6/LIF/HBEGF/AREG/CXCL1/CSF3/BMP4/INHBA/EREG/CLCF1/PDGFC/VEGFA/IL7/BMP2	14
BP	GO:0072001	renal system development	21/485	324/18870	0.000106142	0.0020911	MYC/EGR1/LRP2/LIF/GPR4/SOX17/HAS2/ADAMTS1/AQP1/TIPARP/SULF1/BMP4/OSR1/ASXL1/FADD/RBP4/RDH10/WNT2B/SDC4/VEGFA/BMP2	21
BP	GO:0044000	movement in host	15/485	188/18870	0.000108793	0.00213073	CH25H/EFNB3/DPP4/ICAM1/PTX3/CXCL8/ITGA5/LDLR/VPS37B/CLDN1/LY6E/EPHA2/VAMP8/TRIM6/TRIM68	15
BP	GO:0071456	cellular response to hypoxia	13/485	147/18870	0.000110741	0.0021562	MYC/EGR1/MIR21/FOS/PTGS2/STC1/AQP1/MGARP/EGLN3/HMOX1/MIR17/VEGFA/PCK1	13
BP	GO:0070661	leukocyte proliferation	22/485	350/18870	0.00011428	0.00221216	CDKN1A/IL6/JUNB/PNP/IL18/MIR21/FOSL2/TNFAIP3/GPR183/IRF1/CD274/NFKBIZ/BMP4/IL1B/FADD/PLA2G2A/PELI1/CLCF1/SDC4/CSF1R/PYCARD/IL7	22
BP	GO:0010951	negative regulation of endopeptidase activity	12/485	128/18870	0.000115959	0.00223168	ANXA8/THBS1/SERPINE1/AQP1/KLF4/PLAUR/SERPINB1/MIR17/SERPING1/VEGFA/SERPINB2/SERPINA3	12
BP	GO:0051701	biological process involved in interaction with host	16/485	211/18870	0.000117974	0.00225684	CH25H/EFNB3/DPP4/ICAM1/PTX3/CXCL8/ITGA5/LDLR/VPS37B/CLDN1/LY6E/EPHA2/VAMP8/TRIM6/IFIT1/TRIM68	16
BP	GO:0032946	positive regulation of mononuclear cell proliferation	13/485	148/18870	0.000118622	0.00225684	CDKN1A/IL6/PNP/IL18/MIR21/GPR183/CD274/IL1B/FADD/PELI1/CLCF1/PYCARD/IL7	13
BP	GO:1904238	pericyte cell differentiation	4/485	11/18870	0.000123213	0.00233087	GPR4/BMP4/EPHA2/OSR1	4
BP	GO:0010574	regulation of vascular endothelial growth factor production	8/485	59/18870	0.000126121	0.00235798	IL6/C3/PTGS2/SULF1/IL1B/CYP1B1/MIR17/C5AR1	8
BP	GO:0046686	response to cadmium ion	8/485	59/18870	0.000126121	0.00235798	FOS/JUN/MT2A/MT1M/MT1HL1/MT1H/MT1X/HMOX1	8
BP	GO:0002294	CD4-positive, alpha-beta T cell differentiation involved in immune response	9/485	75/18870	0.00012677	0.00235798	SOCS3/IL6/JUNB/IL18/MIR21/GPR183/BCL3/NFKBIZ/IL4R	9
BP	GO:0009612	response to mechanical stimulus	16/485	213/18870	0.000131657	0.00242378	FOSB/BTG2/FOSL1/FOS/THBS1/IRF1/PTGS2/AQP1/PPL/TNFRSF8/GADD45A/IL1B/FADD/TNFRSF10B/TLR5/NFKB1	16
BP	GO:0048608	reproductive structure development	20/485	305/18870	0.000131764	0.00242378	LRP2/PTX3/C3/TNFAIP6/ADAMTS1/TIPARP/CRIP1/SULF1/BMP4/CYP1B1/OSR1/KDR/RBP4/INHBA/FST/BOK/RDH10/WNT2B/EREG/VEGFA	20
BP	GO:0043367	CD4-positive, alpha-beta T cell differentiation	10/485	93/18870	0.000137535	0.00251604	SOCS3/IL6/JUNB/IL18/MIR21/GPR183/BCL3/NFKBIZ/CD83/IL4R	10
BP	GO:0060541	respiratory system development	16/485	214/18870	0.000139004	0.00251644	LIF/FOSL2/DISP1/CRISPLD2/ERRFI1/BMP4/ASXL1/KDR/RBP4/RDH10/WNT2B/VEGFA/COL3A1/CEBPA/BMP2/MSC	16
BP	GO:0030856	regulation of epithelial cell differentiation	14/485	171/18870	0.000139505	0.00251644	MAFF/ZFP36/LIF/MIR21/APOLD1/SERPINE1/GRHL1/ERRFI1/BMP4/IL1B/OSR1/FST/VEGFA/BMP2	14
BP	GO:0002287	alpha-beta T cell activation involved in immune response	9/485	76/18870	0.00014058	0.00251644	SOCS3/IL6/JUNB/IL18/MIR21/GPR183/BCL3/NFKBIZ/IL4R	9
BP	GO:0002293	alpha-beta T cell differentiation involved in immune response	9/485	76/18870	0.00014058	0.00251644	SOCS3/IL6/JUNB/IL18/MIR21/GPR183/BCL3/NFKBIZ/IL4R	9
BP	GO:0071384	cellular response to corticosteroid stimulus	8/485	60/18870	0.000142298	0.00253069	ZFP36/STC1/AQP1/SGK1/PCK2/CYP1B1/FAM107A/PCK1	8
BP	GO:0070498	interleukin-1-mediated signaling pathway	6/485	32/18870	0.000143479	0.00253069	IL6/EGR1/MIR21/IL1RN/IL1B/IL1RAP	6
BP	GO:0006909	phagocytosis	17/485	237/18870	0.000143656	0.00253069	CCL2/PTX3/C3/THBS1/ALOX15/SPHK1/C2/LDLR/IL1B/RAB27A/MIR17/ANXA3/C4A/IL15RA/MARCO/PYCARD/COLEC12	17
BP	GO:0001818	negative regulation of cytokine production	23/485	381/18870	0.000146529	0.00255427	ZFP36/IL6/MIR21/TNFAIP3/THBS1/BCL3/CD274/KLF4/IL1RL1/REL/CD83/ANXA4/EPHA2/CX3CR1/SERPINB1/INHBA/OAS1/MIR155/CDH3/NLRC3/MIR17/NFKB1/PYCARD	23
BP	GO:0050863	regulation of T cell activation	23/485	381/18870	0.000146529	0.00255427	IL6/JUNB/EFNB3/CCL2/PNP/IL18/EGR3/MIR21/DPP4/IRF1/CD274/NFKBIZ/CD83/BMP4/IL1B/FADD/IL4R/PLA2G2A/PELI1/SDC4/PYCARD/IL7/PCK1	23
BP	GO:0043542	endothelial cell migration	19/485	284/18870	0.000148906	0.00258218	NR4A1/EGR3/MIR21/DPP4/ADAMTS9/THBS1/PTGS2/STC1/KLF4/MIR22/GADD45A/EPHA2/CYP1B1/KDR/MEOX2/HMOX1/ANXA3/VEGFA/ETS1	19
BP	GO:0050670	regulation of lymphocyte proliferation	17/485	238/18870	0.00015112	0.00260699	CDKN1A/IL6/PNP/IL18/MIR21/GPR183/IRF1/CD274/BMP4/IL1B/FADD/PLA2G2A/PELI1/CLCF1/SDC4/PYCARD/IL7	17
BP	GO:0060537	muscle tissue development	25/485	433/18870	0.000153474	0.00263396	MAFF/SIK1/BTG2/ATF3/NR4A1/EGR1/LRP2/RGS2/FOSL2/FOS/EGR2/PIM1/ADAMTS9/TIPARP/KDM6B/BMP4/OSR1/FZD7/MEOX2/RBP4/VEGFA/COL3A1/IFRD1/BMP2/MSC	25
BP	GO:0032729	positive regulation of type II interferon production	9/485	77/18870	0.000155623	0.00265715	ARID5A/SLC7A5/IL18/BCL3/IL1B/FADD/BTN3A2/PDE4B/PYCARD	9
BP	GO:0061458	reproductive system development	20/485	309/18870	0.000156912	0.00266548	LRP2/PTX3/C3/TNFAIP6/ADAMTS1/TIPARP/CRIP1/SULF1/BMP4/CYP1B1/OSR1/KDR/RBP4/INHBA/FST/BOK/RDH10/WNT2B/EREG/VEGFA	20
BP	GO:0097501	stress response to metal ion	5/485	21/18870	0.000158995	0.00268715	MT2A/MT1M/MT1HL1/MT1H/MT1X	5
BP	GO:0061041	regulation of wound healing	12/485	133/18870	0.000167042	0.0028089	HBEGF/TNFAIP3/THBS1/TNFRSF12A/THBD/SERPINE1/CLDN1/PLAUR/UBASH3B/PLAU/SERPING1/SERPINB2	12
BP	GO:0010721	negative regulation of cell development	19/485	287/18870	0.00017053	0.00285057	IL6/BTG2/MYC/EFNB3/MIR21/TNFAIP6/IRF1/SYT4/LDLR/BMP4/IL1B/IL4R/UBASH3B/CCL11/INHBA/FSTL3/VEGFA/CEBPA/IFRD1	19
BP	GO:0061436	establishment of skin barrier	6/485	33/18870	0.000171591	0.00285057	IL18/GRHL1/KLF4/NFKBIZ/CLDN1/UGCG	6
BP	GO:0051346	negative regulation of hydrolase activity	16/485	218/18870	0.000172089	0.00285057	RGS2/MIR21/PTX3/ANXA8/THBS1/SERPINE1/AQP1/KLF4/PPP1R15A/PLAUR/SERPINB1/MIR17/SERPING1/VEGFA/SERPINB2/SERPINA3	16
BP	GO:0007162	negative regulation of cell adhesion	20/485	312/18870	0.000178458	0.00294103	RND1/MIR21/IL1RN/THBS1/IRF1/SERPINE1/CD274/KLF4/BMP4/CYP1B1/FZD7/DUSP1/IL4R/UBASH3B/PLA2G2A/FAM107A/PELI1/SDC4/VEGFA/BMP2	20
BP	GO:0002042	cell migration involved in sprouting angiogenesis	10/485	96/18870	0.000179316	0.00294103	NR4A1/EGR3/THBS1/PTGS2/KLF4/MIR22/KDR/MEOX2/HMOX1/VEGFA	10
BP	GO:0010837	regulation of keratinocyte proliferation	7/485	47/18870	0.000183235	0.00299057	ZFP36/HAS2/MIR21/TGM1/AREG/CDH3/LRG1	7
BP	GO:0032944	regulation of mononuclear cell proliferation	17/485	242/18870	0.000184473	0.00299608	CDKN1A/IL6/PNP/IL18/MIR21/GPR183/IRF1/CD274/BMP4/IL1B/FADD/PLA2G2A/PELI1/CLCF1/SDC4/PYCARD/IL7	17
CC	GO:0034774	secretory granule lumen	20/497	322/19886	0.000188991	0.0182011	PNP/PTX3/HP/SLPI/CXCL1/C3/THBS1/SERPINE1/CRISPLD2/SERPINB1/RAB27A/F5/GLA/SERPING1/VEGFA/NFKB1/PYCARD/HSPA6/SERPINA3/LRG1	20
BP	GO:0001822	kidney development	20/485	314/18870	0.00019423	0.00313925	MYC/EGR1/LRP2/LIF/GPR4/SOX17/HAS2/ADAMTS1/AQP1/TIPARP/SULF1/BMP4/OSR1/ASXL1/FADD/RDH10/WNT2B/SDC4/VEGFA/BMP2	20
MF	GO:0019001	guanyl nucleotide binding	24/489	403/18496	0.000197681	0.0073965	RND1/RAB27B/RAB15/GEM/RND3/RASD1/RERG/RAB17/ATL1/ARL5B/GCH1/SCG5/PCK2/DAPK1/NOLC1/GNAI1/RAB27A/GIMAP1/GIMAP2/ARL4C/GIMAP7/ARL13B/PCK1/RAB38	24
MF	GO:0032561	guanyl ribonucleotide binding	24/489	403/18496	0.000197681	0.0073965	RND1/RAB27B/RAB15/GEM/RND3/RASD1/RERG/RAB17/ATL1/ARL5B/GCH1/SCG5/PCK2/DAPK1/NOLC1/GNAI1/RAB27A/GIMAP1/GIMAP2/ARL4C/GIMAP7/ARL13B/PCK1/RAB38	24
BP	GO:0046718	viral entry into host cell	13/485	156/18870	0.000201036	0.00317857	CH25H/EFNB3/DPP4/ICAM1/PTX3/ITGA5/LDLR/CLDN1/LY6E/EPHA2/VAMP8/TRIM6/TRIM68	13
BP	GO:0010573	vascular endothelial growth factor production	8/485	63/18870	0.00020139	0.00317857	IL6/C3/PTGS2/SULF1/IL1B/CYP1B1/MIR17/C5AR1	8
BP	GO:0060546	negative regulation of necroptotic process	5/485	22/18870	0.000201437	0.00317857	MIR22/BIRC3/FADD/BOK/PELI1	5
BP	GO:0061687	detoxification of inorganic compound	5/485	22/18870	0.000201437	0.00317857	MT2A/MT1M/MT1HL1/MT1H/MT1X	5
BP	GO:0072111	cell proliferation involved in kidney development	5/485	22/18870	0.000201437	0.00317857	MYC/EGR1/BMP4/OSR1/BMP2	5
MF	GO:0035259	nuclear glucocorticoid receptor binding	4/489	12/18496	0.00020178	0.0073965	NR4A3/NR4A1/NR4A2/ETS2	4
BP	GO:0036293	response to decreased oxygen levels	20/485	315/18870	0.000202566	0.00318132	MYC/EGR1/NR4A2/LIF/MIR21/DPP4/FOSL2/FOS/THBS1/PTGS2/STC1/AQP1/MGARP/EGLN3/HMOX1/PLAU/MIR17/VEGFA/PCK1/BMP2	20
BP	GO:0030212	hyaluronan metabolic process	6/485	34/18870	0.00020388	0.00318691	HAS2/TNFAIP6/IL1B/HAS1/CEMIP/NFKB1	6
BP	GO:0042088	T-helper 1 type immune response	7/485	48/18870	0.000209828	0.00324938	ARID5A/IL18/BCL3/IL1RL1/NFKBIZ/IL1B/IL4R	7
BP	GO:0043277	apoptotic cell clearance	7/485	48/18870	0.000209828	0.00324938	CCL2/C3/THBS1/ALOX15/C2/C4A/MARCO	7
BP	GO:0048872	homeostasis of number of cells	20/485	316/18870	0.000211215	0.00325572	ZFP36/IL6/FOSL2/TNFAIP3/GPR183/NFKBIZ/EPB42/BMP4/ASXL1/CX3CR1/FADD/PLA2G2A/INHBA/DOCK11/LGALS2/HMOX1/PDE4B/VEGFA/ETS1/IL7	20
CC	GO:0060205	cytoplasmic vesicle lumen	20/497	325/19886	0.00021359	0.0182011	PNP/PTX3/HP/SLPI/CXCL1/C3/THBS1/SERPINE1/CRISPLD2/SERPINB1/RAB27A/F5/GLA/SERPING1/VEGFA/NFKB1/PYCARD/HSPA6/SERPINA3/LRG1	20
BP	GO:0010466	negative regulation of peptidase activity	12/485	137/18870	0.000220728	0.00338667	ANXA8/THBS1/SERPINE1/AQP1/KLF4/PLAUR/SERPINB1/MIR17/SERPING1/VEGFA/SERPINB2/SERPINA3	12
CC	GO:0031983	vesicle lumen	20/497	326/19886	0.000222393	0.0182011	PNP/PTX3/HP/SLPI/CXCL1/C3/THBS1/SERPINE1/CRISPLD2/SERPINB1/RAB27A/F5/GLA/SERPING1/VEGFA/NFKB1/PYCARD/HSPA6/SERPINA3/LRG1	20
MF	GO:0008201	heparin binding	14/489	174/18496	0.000223564	0.00761777	HBEGF/PTPRF/THBS1/ADAMTS1/CXCL8/CRISPLD2/NELL2/BMP4/RSPO1/CCDC80/CCL8/CCL7/VEGFA/ADAMTS8	14
BP	GO:0036294	cellular response to decreased oxygen levels	13/485	158/18870	0.000228024	0.00346666	MYC/EGR1/MIR21/FOS/PTGS2/STC1/AQP1/MGARP/EGLN3/HMOX1/MIR17/VEGFA/PCK1	13
BP	GO:0098754	detoxification	13/485	158/18870	0.000228024	0.00346666	MIR21/HP/PIM1/PTGS2/PTGS1/MT2A/GCH1/MT1M/MT1HL1/ATP7B/MT1H/MT1X/GPX8	13
MF	GO:0005539	glycosaminoglycan binding	17/489	240/18496	0.000232265	0.00761777	HBEGF/PTPRF/THBS1/TNFAIP6/ADAMTS1/CXCL8/CRISPLD2/NELL2/SULF1/BMP4/RSPO1/CCDC80/CCL8/CCL7/VEGFA/CEMIP/ADAMTS8	17
BP	GO:0007596	blood coagulation	16/485	224/18870	0.000234524	0.00354928	IL6/ANXA8/THBS1/THBD/SERPINE1/TFPI2/PROCR/DGKD/PLAUR/RAB27A/UBASH3B/F5/PLAU/SERPING1/COL3A1/SERPINB2	16
BP	GO:0035710	CD4-positive, alpha-beta T cell activation	11/485	119/18870	0.000250692	0.00375611	SOCS3/IL6/JUNB/IL18/MIR21/GPR183/BCL3/CD274/NFKBIZ/CD83/IL4R	11
BP	GO:0062099	negative regulation of programmed necrotic cell death	5/485	23/18870	0.000251989	0.00375611	MIR22/BIRC3/FADD/BOK/PELI1	5
BP	GO:0043534	blood vessel endothelial cell migration	14/485	181/18870	0.000252703	0.00375611	NR4A1/EGR3/THBS1/PTGS2/KLF4/MIR22/GADD45A/EPHA2/CYP1B1/KDR/MEOX2/HMOX1/VEGFA/ETS1	14
BP	GO:0046631	alpha-beta T cell activation	14/485	181/18870	0.000252703	0.00375611	SOCS3/IL6/JUNB/PNP/IL18/MIR21/FOSL2/GPR183/IRF1/BCL3/CD274/NFKBIZ/CD83/IL4R	14
BP	GO:0051918	negative regulation of fibrinolysis	4/485	13/18870	0.000256249	0.00379188	THBS1/THBD/SERPINE1/PLAU	4
BP	GO:0002718	regulation of cytokine production involved in immune response	11/485	120/18870	0.000269735	0.00394245	IL6/NR4A3/ARID5A/SLC7A5/IL18/IL1B/DDX21/PANX1/TRIM6/TRIL/PYCARD	11
BP	GO:0046660	female sex differentiation	11/485	120/18870	0.000269735	0.00394245	LRP2/PTX3/TNFAIP6/ADAMTS1/TIPARP/KDR/RBP4/INHBA/FST/EREG/VEGFA	11
BP	GO:0010631	epithelial cell migration	22/485	372/18870	0.00027053	0.00394245	NR4A1/HBEGF/EGR3/HAS2/MIR21/DPP4/ADAMTS9/THBS1/PTGS2/STC1/KLF4/MIR22/GADD45A/EPHA2/CYP1B1/KDR/MEOX2/HMOX1/ANXA3/VEGFA/ETS1/LRG1	22
BP	GO:0071385	cellular response to glucocorticoid stimulus	7/485	50/18870	0.000272344	0.00394245	ZFP36/STC1/AQP1/PCK2/CYP1B1/FAM107A/PCK1	7
BP	GO:1902041	regulation of extrinsic apoptotic signaling pathway via death domain receptors	7/485	50/18870	0.000272344	0.00394245	ATF3/ITPRIP/ICAM1/TNFAIP3/THBS1/SERPINE1/HMOX1	7
BP	GO:0007492	endoderm development	9/485	83/18870	0.000276847	0.00399028	DUSP5/DUSP2/SOX17/ITGA5/ARC/BMP4/DUSP1/INHBA/SOX7	9
BP	GO:0006882	intracellular zinc ion homeostasis	6/485	36/18870	0.000282721	0.0040559	MT2A/MT1M/MT1HL1/ATP7B/MT1H/MT1X	6
BP	GO:0050870	positive regulation of T cell activation	17/485	251/18870	0.000283836	0.0040559	IL6/EFNB3/CCL2/PNP/IL18/EGR3/MIR21/DPP4/CD274/NFKBIZ/CD83/IL1B/FADD/IL4R/PYCARD/IL7/PCK1	17
MF	GO:0017017	MAP kinase tyrosine/serine/threonine phosphatase activity	4/489	13/18496	0.000285386	0.00889203	DUSP5/DUSP2/DUSP1/DUSP6	4
BP	GO:0007249	canonical NF-kappaB signal transduction	19/485	300/18870	0.000299365	0.00425951	TNFAIP3/BCL3/TRAF5/REL/BIRC3/IL1B/SLC20A1/CX3CR1/FADD/DDX21/TRIM6/LURAP1L/TRIM68/HMOX1/NLRC3/TNFRSF10B/PELI1/NFKB1/PYCARD	19
BP	GO:0050817	coagulation	16/485	229/18870	0.000300709	0.00426044	IL6/ANXA8/THBS1/THBD/SERPINE1/TFPI2/PROCR/DGKD/PLAUR/RAB27A/UBASH3B/F5/PLAU/SERPING1/COL3A1/SERPINB2	16
BP	GO:0090132	epithelium migration	22/485	375/18870	0.00030229	0.00426468	NR4A1/HBEGF/EGR3/HAS2/MIR21/DPP4/ADAMTS9/THBS1/PTGS2/STC1/KLF4/MIR22/GADD45A/EPHA2/CYP1B1/KDR/MEOX2/HMOX1/ANXA3/VEGFA/ETS1/LRG1	22
BP	GO:0010043	response to zinc ion	7/485	51/18870	0.000308776	0.0043298	MT2A/CRIP1/MT1M/MT1HL1/ZNF658/MT1H/MT1X	7
BP	GO:0048645	animal organ formation	8/485	67/18870	0.000310118	0.0043298	LRP2/SOX17/PIM1/SULF1/BMP4/RDH10/WNT2B/BMP2	8
BP	GO:0002367	cytokine production involved in immune response	11/485	122/18870	0.0003115	0.0043298	IL6/NR4A3/ARID5A/SLC7A5/IL18/IL1B/DDX21/PANX1/TRIM6/TRIL/PYCARD	11
BP	GO:0002366	leukocyte activation involved in immune response	19/485	301/18870	0.000312107	0.0043298	SOCS3/IL6/NR4A3/JUNB/IL18/MIR21/ICAM1/GPR183/BCL3/NFKBIZ/VAMP8/CX3CR1/IL4R/RAB27A/DOCK11/ANXA3/CLCF1/PYCARD/PCK1	19
BP	GO:1902107	positive regulation of leukocyte differentiation	14/485	185/18870	0.000316314	0.0043519	PNP/LIF/IL18/EGR3/MIR21/FOS/NFKBIZ/CD83/KLF10/FADD/IL4R/IL15RA/IL7/PCK1	14
BP	GO:1903708	positive regulation of hemopoiesis	14/485	185/18870	0.000316314	0.0043519	PNP/LIF/IL18/EGR3/MIR21/FOS/NFKBIZ/CD83/KLF10/FADD/IL4R/IL15RA/IL7/PCK1	14
CC	GO:0009897	external side of plasma membrane	22/497	387/19886	0.000320346	0.0209742	SELE/SLC7A5/LRP2/ICAM1/THBS1/THBD/CD274/IL1RL1/ITGA5/CD83/LDLR/BTN3A3/PLAUR/CX3CR1/KDR/IL4R/BTN3A2/PLAU/CD69/ACKR4/ASTN1/OSMR	22
BP	GO:1903900	regulation of viral life cycle	12/485	143/18870	0.000328456	0.00448515	CH25H/PTX3/SLPI/CXCL8/VPS37B/LY6E/TRIM6/IFIT1/OAS1/ISG20/TRIM68/KPNA2	12
BP	GO:1901654	response to ketone	15/485	208/18870	0.000328919	0.00448515	CDKN1A/FOSB/FOSL1/FOS/THBS1/AQP1/SGK1/CLDN1/PCK2/CYP1B1/GNAI1/FBP1/INHBA/F5/PCK1	15
BP	GO:0051385	response to mineralocorticoid	6/485	37/18870	0.000330195	0.00448515	CDKN1A/FOSB/FOSL1/FOS/SGK1/INHBA	6
BP	GO:0007599	hemostasis	16/485	231/18870	0.000331388	0.00448515	IL6/ANXA8/THBS1/THBD/SERPINE1/TFPI2/PROCR/DGKD/PLAUR/RAB27A/UBASH3B/F5/PLAU/SERPING1/COL3A1/SERPINB2	16
BP	GO:0071774	response to fibroblast growth factor	11/485	123/18870	0.000334344	0.00450685	ZFP36/NR4A1/CCL2/FLRT3/EGR3/THBS1/CXCL8/IER2/SULF1/FLRT2/GCLM	11
BP	GO:0030193	regulation of blood coagulation	8/485	68/18870	0.000343695	0.00461421	THBS1/THBD/SERPINE1/PLAUR/UBASH3B/PLAU/SERPING1/SERPINB2	8
BP	GO:1904019	epithelial cell apoptotic process	12/485	144/18870	0.000350157	0.00468106	ZFP36/IL6/CCL2/ICAM1/TNFAIP3/THBS1/SERPINE1/NFKBIZ/KDR/KRT18/BOK/HMOX1	12
BP	GO:0051412	response to corticosterone	4/485	14/18870	0.000351487	0.00468106	CDKN1A/FOSB/FOSL1/FOS	4
MF	GO:0061629	RNA polymerase II-specific DNA-binding transcription factor binding	21/489	344/18496	0.000351784	0.0104389	NR4A3/ARID5A/NR4A1/NR4A2/SOX17/FOS/EGR2/JUN/KLF4/BHLHE40/RERG/ETS2/ANXA4/ASXL1/ZBTB8A/FBP1/TRIM68/RBBP8/DACT1/ETS1/CEBPA	21
BP	GO:0045446	endothelial cell differentiation	11/485	124/18870	0.000358581	0.00475652	SOX17/MIR21/APOLD1/ICAM1/STC1/KDM6B/BMP4/CLDN1/IL1B/KDR/VEGFA	11
BP	GO:0090130	tissue migration	22/485	380/18870	0.000362531	0.00478984	NR4A1/HBEGF/EGR3/HAS2/MIR21/DPP4/ADAMTS9/THBS1/PTGS2/STC1/KLF4/MIR22/GADD45A/EPHA2/CYP1B1/KDR/MEOX2/HMOX1/ANXA3/VEGFA/ETS1/LRG1	22
BP	GO:0002263	cell activation involved in immune response	19/485	305/18870	0.000367925	0.00484189	SOCS3/IL6/NR4A3/JUNB/IL18/MIR21/ICAM1/GPR183/BCL3/NFKBIZ/VAMP8/CX3CR1/IL4R/RAB27A/DOCK11/ANXA3/CLCF1/PYCARD/PCK1	19
BP	GO:0030324	lung development	14/485	188/18870	0.000372605	0.00488417	LIF/FOSL2/CRISPLD2/ERRFI1/BMP4/ASXL1/KDR/RBP4/RDH10/WNT2B/VEGFA/COL3A1/CEBPA/BMP2	14
BP	GO:0071675	regulation of mononuclear cell migration	11/485	125/18870	0.000384278	0.00501742	CCL2/THBS1/SERPINE1/CX3CR1/FADD/DUSP1/CCL7/CCL20/CSF1R/PYCARD/C5AR1	11
BP	GO:0046890	regulation of lipid biosynthetic process	14/485	189/18870	0.000393178	0.00509351	SIK1/EGR1/C3/PTGS2/SPHK1/LDLR/IL1B/INSIG1/RDH10/NFKB1/PCK1/PDK4/BMP2/RAB38	14
BP	GO:0032088	negative regulation of NF-kappaB transcription factor activity	9/485	87/18870	0.000394695	0.00509351	MIR21/TNFAIP3/BCL3/KLF4/ANXA4/CYP1B1/NLRC3/PYCARD/ADORA3	9
BP	GO:0071277	cellular response to calcium ion	9/485	87/18870	0.000394695	0.00509351	FOSB/JUNB/ITPKC/FOS/ALOX15/SYT4/KCNB1/SYT17/CPNE2	9
BP	GO:0045598	regulation of fat cell differentiation	12/485	146/18870	0.000397215	0.00510624	ZFP36/IL6/MIR21/PIM1/PTGS2/ADIRF/METRNL/ASXL1/INSIG1/MIR17/CEBPA/BMP2	12
BP	GO:0046651	lymphocyte proliferation	19/485	307/18870	0.000398955	0.00510889	CDKN1A/IL6/PNP/IL18/MIR21/FOSL2/GPR183/IRF1/CD274/NFKBIZ/BMP4/IL1B/FADD/PLA2G2A/PELI1/CLCF1/SDC4/PYCARD/IL7	19
BP	GO:0050792	regulation of viral process	13/485	168/18870	0.000414389	0.0052862	ZFP36/CH25H/PTX3/SLPI/CXCL8/VPS37B/LY6E/TRIM6/IFIT1/OAS1/ISG20/TRIM68/KPNA2	13
BP	GO:1900046	regulation of hemostasis	8/485	70/18870	0.000419744	0.00533407	THBS1/THBD/SERPINE1/PLAUR/UBASH3B/PLAU/SERPING1/SERPINB2	8
BP	GO:0071214	cellular response to abiotic stimulus	20/485	334/18870	0.000432926	0.00543211	CDKN1A/MYC/EGR1/SPIDR/MIR21/IRF1/PTGS2/AQP1/CRIP1/TNFRSF8/DDB2/GADD45A/IL1B/FADD/FBP1/TNFRSF10B/TLR5/NFKB1/PYCARD/PCK1	20
BP	GO:0104004	cellular response to environmental stimulus	20/485	334/18870	0.000432926	0.00543211	CDKN1A/MYC/EGR1/SPIDR/MIR21/IRF1/PTGS2/AQP1/CRIP1/TNFRSF8/DDB2/GADD45A/IL1B/FADD/FBP1/TNFRSF10B/TLR5/NFKB1/PYCARD/PCK1	20
BP	GO:0007173	epidermal growth factor receptor signaling pathway	10/485	107/18870	0.000434791	0.00543211	GPRC5A/HBEGF/MIR21/AREG/WDR54/BCAR3/ERRFI1/DGKD/PLAUR/EREG	10
BP	GO:0002700	regulation of production of molecular mediator of immune response	14/485	191/18870	0.000437248	0.00543211	IL6/NR4A3/ARID5A/SLC7A5/IL18/IL1B/DDX21/IL4R/PANX1/RBP4/TRIM6/CLCF1/TRIL/PYCARD	14
BP	GO:0071706	tumor necrosis factor superfamily cytokine production	14/485	191/18870	0.000437248	0.00543211	ZFP36/IL6/ARID5A/TNFAIP3/THBS1/BCL3/CD274/TNFRSF8/CX3CR1/FADD/OAS1/NLRC3/PYCARD/AKAP12	14
BP	GO:1903555	regulation of tumor necrosis factor superfamily cytokine production	14/485	191/18870	0.000437248	0.00543211	ZFP36/IL6/ARID5A/TNFAIP3/THBS1/BCL3/CD274/TNFRSF8/CX3CR1/FADD/OAS1/NLRC3/PYCARD/AKAP12	14
BP	GO:0030323	respiratory tube development	14/485	192/18870	0.000460818	0.00570365	LIF/FOSL2/CRISPLD2/ERRFI1/BMP4/ASXL1/KDR/RBP4/RDH10/WNT2B/VEGFA/COL3A1/CEBPA/BMP2	14
MF	GO:0005544	calcium-dependent phospholipid binding	7/489	53/18496	0.000465538	0.0131865	ANXA8/SYT4/ANXA4/SYT17/ANXA9/ANXA3/CPNE2	7
BP	GO:0044849	estrous cycle	4/485	15/18870	0.000469606	0.00576952	EGR1/HAS2/CA12/CYP1B1	4
BP	GO:0060572	morphogenesis of an epithelial bud	4/485	15/18870	0.000469606	0.00576952	SULF1/BMP4/RDH10/WNT2B	4
BP	GO:0002822	regulation of adaptive immune response based on somatic recombination of immune receptors built from immunoglobulin superfamily domains	14/485	193/18870	0.000485463	0.00594241	IL6/ARID5A/JUNB/IL18/MIR21/TNFAIP3/C3/CD274/IL1RL1/NFKBIZ/IL1B/FADD/IL4R/CLCF1	14
BP	GO:0042063	gliogenesis	20/485	338/18870	0.000503461	0.00614015	IL6/MYRF/SLC7A5/CCL2/LRP2/LIF/AREG/GPR183/EGR2/PHGDH/LDLR/IL1B/CX3CR1/BOK/B4GALT5/CLCF1/CSF1R/COL3A1/C5AR1/BMP2	20
BP	GO:0014823	response to activity	8/485	72/18870	0.000508924	0.00618413	IL6/SLC7A5/SLC25A25/FOS/KDM6B/METRNL/GCLM/PCK1	8
BP	GO:0032943	mononuclear cell proliferation	19/485	314/18870	0.000526171	0.00637045	CDKN1A/IL6/PNP/IL18/MIR21/FOSL2/GPR183/IRF1/CD274/NFKBIZ/BMP4/IL1B/FADD/PLA2G2A/PELI1/CLCF1/SDC4/PYCARD/IL7	19
BP	GO:0002274	myeloid leukocyte activation	16/485	241/18870	0.000528669	0.0063775	IL6/NR4A3/IL18/THBS1/CXCL8/SPHK1/IL1RL1/LDLR/VAMP8/CX3CR1/IL4R/PLA2G2A/ANXA3/PYCARD/CEBPA/C5AR1	16
BP	GO:0002821	positive regulation of adaptive immune response	11/485	130/18870	0.000537136	0.00644496	IL6/ARID5A/IL18/MIR21/C3/CD274/NFKBIZ/IL1B/FADD/CLCF1/PYCARD	11
BP	GO:2000116	regulation of cysteine-type endopeptidase activity	14/485	195/18870	0.000538133	0.00644496	MYC/THBS1/AQP1/KLF4/BIRC3/PLAUR/FADD/DAPK1/EGLN3/SOX7/BOK/MIR17/VEGFA/PYCARD	14
BP	GO:0014013	regulation of gliogenesis	10/485	110/18870	0.000542046	0.00646856	IL6/MYRF/SLC7A5/LRP2/LIF/EGR2/LDLR/IL1B/CLCF1/BMP2	10
BP	GO:0032740	positive regulation of interleukin-17 production	5/485	27/18870	0.000555463	0.00657591	IL6/ARID5A/SLC7A5/IL18/SPHK1	5
BP	GO:0048745	smooth muscle tissue development	5/485	27/18870	0.000555463	0.00657591	FOSL2/TIPARP/BMP4/OSR1/COL3A1	5
BP	GO:0006809	nitric oxide biosynthetic process	8/485	73/18870	0.000558942	0.00657591	PTX3/PTGS2/KLF4/GCH1/IL1B/CYP1B1/CX3CR1/GLA	8
BP	GO:0140962	multicellular organismal-level chemical homeostasis	8/485	73/18870	0.000558942	0.00657591	HAS2/AQP1/EPB42/KDR/OAS1/MYO5B/HMOX1/VEGFA	8
BP	GO:0007259	receptor signaling pathway via JAK-STAT	13/485	174/18870	0.000578909	0.00676302	SOCS3/IL6/CCL2/LIF/IL18/MST1/BCL3/SOCS2/GADD45A/CYP1B1/CLCF1/IL15RA/CSF1R	13
BP	GO:0071453	cellular response to oxygen levels	13/485	174/18870	0.000578909	0.00676302	MYC/EGR1/MIR21/FOS/PTGS2/STC1/AQP1/MGARP/EGLN3/HMOX1/MIR17/VEGFA/PCK1	13
BP	GO:0019216	regulation of lipid metabolic process	20/485	342/18870	0.000583768	0.00679335	NR4A3/SIK1/CH25H/EGR1/AADAC/C3/PTGS2/SPHK1/LDLR/IL1B/LDLRAP1/INSIG1/RDH10/NFKB1/FMO1/PCK1/PDK4/SERPINA3/BMP2/RAB38	20
BP	GO:0150077	regulation of neuroinflammatory response	6/485	41/18870	0.000585586	0.00679335	IL6/IL18/PTGS2/SPHK1/LDLR/IL1B	6
BP	GO:0043588	skin development	19/485	317/18870	0.000590624	0.00680438	ZFP36/CDKN1A/IL18/FOSL2/TGM1/GRHL1/KLF4/NFKBIZ/PPL/ERRFI1/CLDN1/EPHA2/UGCG/INHBA/FST/CDH3/EREG/COL1A2/COL3A1	19
BP	GO:0062197	cellular response to chemical stress	19/485	317/18870	0.000590624	0.00680438	IL6/NR4A2/MIR21/FOS/TNFAIP3/JUN/PTGS2/AQP1/SPHK1/KDM6B/GCH1/CYP1B1/DAPK1/FBP1/GPX8/HMOX1/MIR17/PYCARD/PCK1	19
MF	GO:0003924	GTPase activity	20/489	333/18496	0.000592686	0.0160581	RND1/RAB27B/RGS2/RGS1/RAB15/GEM/RND3/RASD1/RGS16/RERG/RAB17/ATL1/ARL5B/GCH1/GNAI1/RAB27A/ARL4C/GIMAP7/ARL13B/RAB38	20
BP	GO:0140747	regulation of ncRNA transcription	9/485	92/18870	0.000597212	0.00685656	MYC/EGR1/FOSL1/FOS/JUN/KLF4/BMP4/ETS1/BMP2	9
BP	GO:0051091	positive regulation of DNA-binding transcription factor activity	16/485	244/18870	0.000604671	0.00691834	IL6/IL18/LPAR5/ABRA/CSF3/SPHK1/PPRC1/TRAF5/IL1B/CX3CR1/TRIM6/TRIM68/ANXA3/PYCARD/IL1RAP/BMP2	16
BP	GO:0045779	negative regulation of bone resorption	4/485	16/18870	0.000613489	0.00697132	IL6/TNFAIP3/CALCA/UBASH3B	4
BP	GO:0051770	positive regulation of nitric-oxide synthase biosynthetic process	4/485	16/18870	0.000613489	0.00697132	CCL2/NAMPT/KDR/AKAP12	4
BP	GO:0048525	negative regulation of viral process	9/485	93/18870	0.000646464	0.00729621	ZFP36/CH25H/PTX3/SLPI/LY6E/TRIM6/IFIT1/OAS1/ISG20	9
BP	GO:1904705	regulation of vascular associated smooth muscle cell proliferation	9/485	93/18870	0.000646464	0.00729621	CDKN1A/NR4A3/MIR21/ADAMTS1/JUN/BMP4/LDLRAP1/MIR17/CNN1	9
BP	GO:1902075	cellular response to salt	14/485	199/18870	0.00065816	0.00739711	FOSB/JUNB/EGR1/ITPKC/FOS/PTGS2/ALOX15/SYT4/KCNB1/CLDN1/SYT17/GCLM/CEBPA/CPNE2	14
BP	GO:0002675	positive regulation of acute inflammatory response	5/485	28/18870	0.000662068	0.00739711	IL6/C3/PTGS2/IL1B/OSMR	5
BP	GO:0090594	inflammatory response to wounding	5/485	28/18870	0.000662068	0.00739711	IL6/MIR21/NFKBIZ/HMOX1/MIR17	5
BP	GO:0045124	regulation of bone resorption	6/485	42/18870	0.00066855	0.00742109	IL6/TNFAIP3/CALCA/UBASH3B/CSF1R/PDK4	6
BP	GO:1904035	regulation of epithelial cell apoptotic process	10/485	113/18870	0.000670335	0.00742109	ZFP36/IL6/CCL2/ICAM1/TNFAIP3/THBS1/SERPINE1/KDR/BOK/HMOX1	10
BP	GO:0061045	negative regulation of wound healing	8/485	75/18870	0.000670901	0.00742109	THBS1/THBD/SERPINE1/PLAUR/UBASH3B/PLAU/SERPING1/SERPINB2	8
BP	GO:0001706	endoderm formation	7/485	58/18870	0.000687212	0.00755133	DUSP5/DUSP2/SOX17/ITGA5/DUSP1/INHBA/SOX7	7
BP	GO:0061756	leukocyte adhesion to vascular endothelial cell	7/485	58/18870	0.000687212	0.00755133	IL6/SELE/MIR21/KLF4/CX3CR1/ETS1/LRG1	7
BP	GO:0030336	negative regulation of cell migration	21/485	373/18870	0.000702671	0.00769581	CCL2/MIR21/DPP4/ADAMTS9/THBS1/TNFAIP6/SERPINE1/STC1/KLF4/MIR22/GADD45A/SULF1/BMP4/CYP1B1/CX3CR1/DUSP1/MEOX2/HAS1/HMOX1/COL3A1/ADORA3	21
CC	GO:0042581	specific granule	12/497	160/19886	0.000708712	0.0348443	SLC2A3/PTX3/HP/SLPI/CXCL1/PLAUR/VAMP8/RAB27A/PLAU/ANXA3/NFKB1/LRG1	12
BP	GO:0072006	nephron development	12/485	156/18870	0.000720523	0.00784831	MYC/EGR1/LIF/GPR4/AQP1/SULF1/BMP4/OSR1/ASXL1/WNT2B/VEGFA/BMP2	12
BP	GO:0006979	response to oxidative stress	22/485	400/18870	0.00072131	0.00784831	IL6/NR4A2/FOSL1/MIR21/AREG/FOS/TNFAIP3/HP/JUN/PTGS2/AQP1/SPHK1/PTGS1/PPP1R15B/KDM6B/GCH1/CYP1B1/DAPK1/GPX8/HMOX1/MIR17/GCLM	22
BP	GO:0045229	external encapsulating structure organization	19/485	323/18870	0.000740226	0.00802789	IL6/HAS2/DPP4/TGM1/PTX3/ADAMTS9/ADAMTS1/BCL3/CRISPLD2/SULF1/FLRT2/CYP1B1/HAS1/CCDC80/OLFML2B/COL1A2/ADAMTS8/COL3A1/BMP2	19
BP	GO:1990874	vascular associated smooth muscle cell proliferation	9/485	95/18870	0.000754935	0.00815443	CDKN1A/NR4A3/MIR21/ADAMTS1/JUN/BMP4/LDLRAP1/MIR17/CNN1	9
BP	GO:0001935	endothelial cell proliferation	14/485	202/18870	0.000762423	0.00815443	NR4A1/CCL2/EGR3/MIR21/THBS1/MIR22/SULF1/BMP4/EPHA2/KDR/CCL11/HMOX1/VEGFA/LRG1	14
BP	GO:0032608	interferon-beta production	7/485	59/18870	0.000762743	0.00815443	IRF1/REL/RNF135/OAS1/NLRC3/ARRDC4/PYCARD	7
BP	GO:0032648	regulation of interferon-beta production	7/485	59/18870	0.000762743	0.00815443	IRF1/REL/RNF135/OAS1/NLRC3/ARRDC4/PYCARD	7
BP	GO:0044344	cellular response to fibroblast growth factor stimulus	10/485	115/18870	0.000769038	0.00815443	ZFP36/NR4A1/CCL2/FLRT3/EGR3/THBS1/CXCL8/SULF1/FLRT2/GCLM	10
BP	GO:0048259	regulation of receptor-mediated endocytosis	10/485	115/18870	0.000769038	0.00815443	SELE/C3/SERPINE1/WDR54/ARC/DGKD/RSPO1/LDLRAP1/MIR17/VEGFA	10
BP	GO:0062014	negative regulation of small molecule metabolic process	10/485	115/18870	0.000769038	0.00815443	SIK1/CH25H/MIR21/IER3/MST1/FBP1/INSIG1/NFKB1/FMO1/BMP2	10
BP	GO:0072012	glomerulus vasculature development	5/485	29/18870	0.000783273	0.008279	EGR1/GPR4/AQP1/BMP4/OSR1	5
BP	GO:0070206	protein trimerization	4/485	17/18870	0.000786058	0.00828215	ITLN1/MLKL/COL1A2/STEAP4	4
BP	GO:0030099	myeloid cell differentiation	23/485	430/18870	0.00080433	0.00844794	ZFP36/JUNB/MYC/LIF/FOSL2/FOS/GPR183/TNFAIP6/CSF3/IL1RL1/EPB42/KLF10/BMP4/EPHA2/FADD/UBASH3B/INHBA/FSTL3/VEGFA/ETS1/CSF1R/CEBPA/BMP2	23
BP	GO:0002690	positive regulation of leukocyte chemotaxis	9/485	96/18870	0.000814482	0.00852766	IL6/THBS1/CXCL8/SERPINE1/CX3CR1/CCL7/VEGFA/CSF1R/C5AR1	9
BP	GO:0001936	regulation of endothelial cell proliferation	13/485	181/18870	0.000837524	0.00874142	NR4A1/CCL2/EGR3/MIR21/THBS1/MIR22/SULF1/BMP4/KDR/CCL11/HMOX1/VEGFA/LRG1	13
BP	GO:1903307	positive regulation of regulated secretory pathway	6/485	44/18870	0.000861543	0.00896401	RAB15/SYT4/KCNB1/VAMP8/IL4R/RAB27A	6
BP	GO:0045921	positive regulation of exocytosis	8/485	78/18870	0.000872072	0.00901721	RAB27B/RAB15/SYT4/KCNB1/VAMP8/IL4R/RAB27A/SDC4	8
BP	GO:0046209	nitric oxide metabolic process	8/485	78/18870	0.000872072	0.00901721	PTX3/PTGS2/KLF4/GCH1/IL1B/CYP1B1/CX3CR1/GLA	8
MF	GO:0005149	interleukin-1 receptor binding	4/489	17/18496	0.000873386	0.0221596	IL1RN/IL1B/TLR5/IL1RAP	4
CC	GO:0035580	specific granule lumen	7/497	62/19886	0.000875734	0.0348443	PTX3/HP/SLPI/CXCL1/RAB27A/NFKB1/LRG1	7
BP	GO:0042129	regulation of T cell proliferation	13/485	182/18870	0.000881374	0.00908517	IL6/PNP/IL18/MIR21/IRF1/CD274/BMP4/IL1B/FADD/PLA2G2A/PELI1/SDC4/PYCARD	13
MF	GO:0033612	receptor serine/threonine kinase binding	5/489	29/18496	0.000889004	0.0221596	BMP4/FADD/INHBA/PYCARD/BMP2	5
CC	GO:0043034	costamere	4/497	18/19886	0.000892611	0.0348443	KRT19/AHNAK2/FLNC/SDC4	4
BP	GO:0006940	regulation of smooth muscle contraction	7/485	61/18870	0.000933426	0.00959203	RGS2/MIR21/PTGS2/SPHK1/CALCA/NMU/CNN1	7
BP	GO:0051403	stress-activated MAPK cascade	15/485	230/18870	0.000936834	0.00959288	ZFP36/GADD45B/MYC/SPHK1/GADD45G/GADD45A/BMP4/IL1B/FZD7/DUSP1/DACT1/VEGFA/NFKB1/PYCARD/BMP2	15
BP	GO:1903707	negative regulation of hemopoiesis	10/485	118/18870	0.000939271	0.00959288	MYC/MIR21/TNFAIP6/IRF1/BMP4/IL4R/UBASH3B/INHBA/FSTL3/CEBPA	10
BP	GO:2001057	reactive nitrogen species metabolic process	8/485	79/18870	0.000948953	0.00966212	PTX3/PTGS2/KLF4/GCH1/IL1B/CYP1B1/CX3CR1/GLA	8
CC	GO:0005788	endoplasmic reticulum lumen	18/497	313/19886	0.000957938	0.0348443	IL6/MSLN/BCHE/C3/THBS1/PTGS2/BMP4/PLAUR/TSPAN5/F5/GPX8/SERPING1/C4A/FSTL3/PDGFC/COL1A2/FMO1/COL3A1	18
BP	GO:0009615	response to virus	23/485	436/18870	0.000968215	0.00982819	IL6/FOSL1/MIR21/TNFAIP3/IRF1/BCL3/FBXL2/RNF135/IL1B/RTP4/VAMP8/FADD/DDX21/CCL11/TRIM6/IFIT1/OAS1/CCL8/ISG20/NLRC3/MLKL/NFKB1/PYCARD	23
BP	GO:0048771	tissue remodeling	13/485	184/18870	0.000974867	0.00984637	IL6/LIF/IL18/FOSL2/TNFAIP3/CALCA/EPHA2/UBASH3B/MIR17/NFKB1/CSF1R/IL7/PDK4	13
BP	GO:0010594	regulation of endothelial cell migration	15/485	231/18870	0.000978878	0.00984637	MIR21/ADAMTS9/THBS1/PTGS2/STC1/KLF4/MIR22/GADD45A/EPHA2/KDR/MEOX2/HMOX1/ANXA3/VEGFA/ETS1	15
BP	GO:0050730	regulation of peptidyl-tyrosine phosphorylation	15/485	231/18870	0.000978878	0.00984637	SOCS3/IL6/GPRC5A/LIF/IL18/HBEGF/AREG/CSF3/ITGA5/ERRFI1/CLCF1/PDGFC/VEGFA/CSF1R/IL7	15
BP	GO:0010755	regulation of plasminogen activation	4/485	18/18870	0.000990259	0.00990103	THBS1/SERPINE1/PLAUR/PLAU	4
BP	GO:0046851	negative regulation of bone remodeling	4/485	18/18870	0.000990259	0.00990103	IL6/TNFAIP3/CALCA/UBASH3B	4
BP	GO:0050920	regulation of chemotaxis	15/485	232/18870	0.00102251	0.0101928	IL6/CCL2/DPP4/GPR183/THBS1/TNFAIP6/CXCL8/SERPINE1/CX3CR1/KDR/DUSP1/CCL7/VEGFA/CSF1R/C5AR1	15
BP	GO:0043030	regulation of macrophage activation	7/485	62/18870	0.00102934	0.010218	IL6/THBS1/SPHK1/IL1RL1/LDLR/IL4R/CEBPA	7
BP	GO:0090049	regulation of cell migration involved in sprouting angiogenesis	8/485	80/18870	0.00103117	0.010218	THBS1/PTGS2/KLF4/MIR22/KDR/MEOX2/HMOX1/VEGFA	8
BP	GO:0008544	epidermis development	21/485	385/18870	0.00104888	0.0102701	MAFF/ZFP36/CDKN1A/BNC1/IL18/FOSL2/TGM1/GRHL1/KLF4/NFKBIZ/PPL/ERRFI1/BMP4/CLDN1/EPHA2/UGCG/INHBA/FST/CDH3/EMP1/EREG	21
BP	GO:0043281	regulation of cysteine-type endopeptidase activity involved in apoptotic process	12/485	163/18870	0.00105894	0.0102701	MYC/THBS1/AQP1/KLF4/PLAUR/DAPK1/EGLN3/SOX7/BOK/MIR17/VEGFA/PYCARD	12
BP	GO:0008406	gonad development	15/485	233/18870	0.00106777	0.0102701	LRP2/PTX3/TNFAIP6/ADAMTS1/TIPARP/CYP1B1/OSR1/KDR/INHBA/FST/BOK/RDH10/WNT2B/EREG/VEGFA	15
BP	GO:0002825	regulation of T-helper 1 type immune response	5/485	31/18870	0.00107435	0.0102701	ARID5A/IL18/IL1RL1/IL1B/IL4R	5
BP	GO:0032682	negative regulation of chemokine production	5/485	31/18870	0.00107435	0.0102701	IL6/KLF4/EPHA2/OAS1/MIR17	5
BP	GO:0035335	peptidyl-tyrosine dephosphorylation	5/485	31/18870	0.00107435	0.0102701	DUSP5/PTPRF/DUSP1/UBASH3B/DUSP6	5
BP	GO:0035767	endothelial cell chemotaxis	5/485	31/18870	0.00107435	0.0102701	NR4A1/EGR3/THBS1/KDR/VEGFA	5
BP	GO:0061437	renal system vasculature development	5/485	31/18870	0.00107435	0.0102701	EGR1/GPR4/AQP1/BMP4/OSR1	5
BP	GO:0061440	kidney vasculature development	5/485	31/18870	0.00107435	0.0102701	EGR1/GPR4/AQP1/BMP4/OSR1	5
BP	GO:1902042	negative regulation of extrinsic apoptotic signaling pathway via death domain receptors	5/485	31/18870	0.00107435	0.0102701	ITPRIP/ICAM1/TNFAIP3/SERPINE1/HMOX1	5
BP	GO:0032640	tumor necrosis factor production	13/485	186/18870	0.00107652	0.0102701	ZFP36/IL6/ARID5A/TNFAIP3/THBS1/BCL3/TNFRSF8/CX3CR1/FADD/OAS1/NLRC3/PYCARD/AKAP12	13
BP	GO:0032680	regulation of tumor necrosis factor production	13/485	186/18870	0.00107652	0.0102701	ZFP36/IL6/ARID5A/TNFAIP3/THBS1/BCL3/TNFRSF8/CX3CR1/FADD/OAS1/NLRC3/PYCARD/AKAP12	13
BP	GO:0032872	regulation of stress-activated MAPK cascade	13/485	186/18870	0.00107652	0.0102701	GADD45B/MYC/SPHK1/GADD45G/GADD45A/BMP4/IL1B/FZD7/DUSP1/DACT1/VEGFA/PYCARD/BMP2	13
MF	GO:0030297	transmembrane receptor protein tyrosine kinase activator activity	4/489	18/18496	0.00109963	0.024473	HBEGF/AREG/EREG/VEGFA	4
MF	GO:0033549	MAP kinase phosphatase activity	4/489	18/18496	0.00109963	0.024473	DUSP5/DUSP2/DUSP1/DUSP6	4
MF	GO:0045236	CXCR chemokine receptor binding	4/489	18/18496	0.00109963	0.024473	CXCL2/CXCL1/CXCL8/CXCL3	4
BP	GO:0042058	regulation of epidermal growth factor receptor signaling pathway	7/485	63/18870	0.00113284	0.0107764	GPRC5A/MIR21/WDR54/BCAR3/ERRFI1/DGKD/PLAUR	7
BP	GO:2000146	negative regulation of cell motility	21/485	388/18870	0.00115545	0.0109602	CCL2/MIR21/DPP4/ADAMTS9/THBS1/TNFAIP6/SERPINE1/STC1/KLF4/MIR22/GADD45A/SULF1/BMP4/CYP1B1/CX3CR1/DUSP1/MEOX2/HAS1/HMOX1/COL3A1/ADORA3	21
BP	GO:0071375	cellular response to peptide hormone stimulus	18/485	310/18870	0.00117063	0.0110569	SOCS3/NR4A3/NR4A1/NR4A2/FOS/BCAR3/SOCS2/IL1B/PCK2/CYP1B1/MGARP/CA2/FBP1/INHBA/INSIG1/NFKB1/PCK1/PDK4	18
BP	GO:0008585	female gonad development	9/485	101/18870	0.00117228	0.0110569	PTX3/TNFAIP6/ADAMTS1/TIPARP/KDR/INHBA/FST/EREG/VEGFA	9
BP	GO:0003158	endothelium development	11/485	143/18870	0.00118582	0.0111316	SOX17/MIR21/APOLD1/ICAM1/STC1/KDM6B/BMP4/CLDN1/IL1B/KDR/VEGFA	11
BP	GO:0097696	receptor signaling pathway via STAT	13/485	188/18870	0.00118689	0.0111316	SOCS3/IL6/CCL2/LIF/IL18/MST1/BCL3/SOCS2/GADD45A/CYP1B1/CLCF1/IL15RA/CSF1R	13
BP	GO:0150076	neuroinflammatory response	8/485	82/18870	0.00121265	0.0112799	IL6/IL18/PTGS2/SPHK1/LDLR/IL1B/CX3CR1/C5AR1	8
BP	GO:0032874	positive regulation of stress-activated MAPK cascade	10/485	122/18870	0.00121315	0.0112799	GADD45B/SPHK1/GADD45G/GADD45A/BMP4/IL1B/FZD7/VEGFA/PYCARD/BMP2	10
BP	GO:0002221	pattern recognition receptor signaling pathway	15/485	236/18870	0.00121382	0.0112799	FOSL1/TNFAIP3/IRF1/FBXL2/NFKBIZ/RNF135/BIRC3/OAS1/NLRC3/MIR17/PELI1/TRIL/TLR5/PYCARD/COLEC12	15
BP	GO:0045619	regulation of lymphocyte differentiation	14/485	212/18870	0.00121634	0.0112799	JUNB/PNP/IL18/EGR3/MIR21/IRF1/NFKBIZ/CD83/BMP4/IL4R/INHBA/IL15RA/IL7/PCK1	14
BP	GO:0062012	regulation of small molecule metabolic process	19/485	337/18870	0.00122106	0.0112799	NR4A3/SIK1/CH25H/EGR1/MIR21/IER3/MST1/PTGS2/LDLR/IL1B/LDLRAP1/FBP1/SLC7A7/INSIG1/RDH10/NFKB1/FMO1/PDK4/BMP2	19
BP	GO:0072538	T-helper 17 type immune response	6/485	47/18870	0.00122824	0.0112799	SOCS3/IL6/ARID5A/JUNB/MIR21/NFKBIZ	6
BP	GO:0035743	CD4-positive, alpha-beta T cell cytokine production	4/485	19/18870	0.00122905	0.0112799	IL6/ARID5A/IL18/IL1B	4
BP	GO:0048247	lymphocyte chemotaxis	7/485	64/18870	0.00124432	0.0112799	CH25H/CCL2/GPR183/CCL11/CCL8/CCL7/CCL20	7
BP	GO:0070302	regulation of stress-activated protein kinase signaling cascade	13/485	189/18870	0.00124552	0.0112799	GADD45B/MYC/SPHK1/GADD45G/GADD45A/BMP4/IL1B/FZD7/DUSP1/DACT1/VEGFA/PYCARD/BMP2	13
BP	GO:0002313	mature B cell differentiation involved in immune response	5/485	32/18870	0.00124674	0.0112799	IL6/GPR183/BCL3/NFKBIZ/DOCK11	5
BP	GO:0048710	regulation of astrocyte differentiation	5/485	32/18870	0.00124674	0.0112799	IL6/LIF/LDLR/CLCF1/BMP2	5
BP	GO:0060055	angiogenesis involved in wound healing	5/485	32/18870	0.00124674	0.0112799	GPR4/TNFAIP3/SERPINE1/KDR/VEGFA	5
BP	GO:0060795	cell fate commitment involved in formation of primary germ layer	5/485	32/18870	0.00124674	0.0112799	SOX17/KLF4/ETS2/BMP4/FZD7	5
BP	GO:0010565	regulation of cellular ketone metabolic process	11/485	144/18870	0.00125493	0.0113125	NR4A3/EGR1/MIR21/PTGS2/IL1B/SLC7A7/INSIG1/RDH10/FMO1/PDK4/BMP2	11
BP	GO:0008630	intrinsic apoptotic signaling pathway in response to DNA damage	9/485	102/18870	0.00125715	0.0113125	CDKN1A/IER3/BCL3/MCL1/CRIP1/EPHA2/BOK/BCL2A1/PYCARD	9
BP	GO:0002285	lymphocyte activation involved in immune response	14/485	213/18870	0.00127213	0.0113858	SOCS3/IL6/JUNB/IL18/MIR21/ICAM1/GPR183/BCL3/NFKBIZ/IL4R/RAB27A/DOCK11/CLCF1/PCK1	14
BP	GO:1901888	regulation of cell junction assembly	14/485	213/18870	0.00127213	0.0113858	EFNB3/CBLN2/FLRT3/THBS1/RAB17/FLRT2/CLDN1/IL1B/EPHA2/KDR/FAM107A/SDC4/VEGFA/IL1RAP	14
BP	GO:0030282	bone mineralization	10/485	123/18870	0.00129092	0.011523	FOSL2/PTGS2/ALOX15/SGMS2/SLC24A3/KLF10/BMP4/OSR1/COL1A2/BMP2	10
BP	GO:0043433	negative regulation of DNA-binding transcription factor activity	12/485	167/18870	0.0013055	0.011622	SIK1/MIR21/TNFAIP3/PIM1/BCL3/KLF4/BHLHE40/ANXA4/CYP1B1/NLRC3/PYCARD/ADORA3	12
BP	GO:0031098	stress-activated protein kinase signaling cascade	15/485	238/18870	0.00132024	0.0116907	ZFP36/GADD45B/MYC/SPHK1/GADD45G/GADD45A/BMP4/IL1B/FZD7/DUSP1/DACT1/VEGFA/NFKB1/PYCARD/BMP2	15
BP	GO:0045137	development of primary sexual characteristics	15/485	238/18870	0.00132024	0.0116907	LRP2/PTX3/TNFAIP6/ADAMTS1/TIPARP/CYP1B1/OSR1/KDR/INHBA/FST/BOK/RDH10/WNT2B/EREG/VEGFA	15
BP	GO:0032677	regulation of interleukin-8 production	9/485	103/18870	0.0013469	0.0118951	IL6/BCL3/SERPINE1/KLF4/IL1B/ANXA4/FADD/TLR5/PYCARD	9
BP	GO:0045453	bone resorption	7/485	65/18870	0.0013642	0.0119643	IL6/TNFAIP3/CALCA/UBASH3B/CSF1R/IL7/PDK4	7
BP	GO:0002824	positive regulation of adaptive immune response based on somatic recombination of immune receptors built from immunoglobulin superfamily domains	10/485	124/18870	0.0013727	0.0119643	IL6/ARID5A/IL18/MIR21/C3/CD274/NFKBIZ/IL1B/FADD/CLCF1	10
BP	GO:0038127	ERBB signaling pathway	10/485	124/18870	0.0013727	0.0119643	GPRC5A/HBEGF/MIR21/AREG/WDR54/BCAR3/ERRFI1/DGKD/PLAUR/EREG	10
BP	GO:0070304	positive regulation of stress-activated protein kinase signaling cascade	10/485	124/18870	0.0013727	0.0119643	GADD45B/SPHK1/GADD45G/GADD45A/BMP4/IL1B/FZD7/VEGFA/PYCARD/BMP2	10
BP	GO:0072676	lymphocyte migration	10/485	124/18870	0.0013727	0.0119643	CH25H/CCL2/ICAM1/GPR183/FADD/CCL11/CCL8/CCL7/CCL20/PYCARD	10
MF	GO:0002020	protease binding	11/489	142/18496	0.00140163	0.0301184	DPP4/TNFAIP3/THBS1/SERPINE1/LDLR/FADD/PANX1/ANXA9/PYCARD/COL1A2/COL3A1	11
BP	GO:0043618	regulation of transcription from RNA polymerase II promoter in response to stress	5/485	33/18870	0.00143873	0.0124359	ATF3/EGR1/JUN/HMOX1/VEGFA	5
BP	GO:0060914	heart formation	5/485	33/18870	0.00143873	0.0124359	LRP2/SOX17/PIM1/BMP4/BMP2	5
BP	GO:0072539	T-helper 17 cell differentiation	5/485	33/18870	0.00143873	0.0124359	SOCS3/IL6/JUNB/MIR21/NFKBIZ	5
BP	GO:0032637	interleukin-8 production	9/485	104/18870	0.00144174	0.0124359	IL6/BCL3/SERPINE1/KLF4/IL1B/ANXA4/FADD/TLR5/PYCARD	9
BP	GO:0043122	regulation of canonical NF-kappaB signal transduction	16/485	265/18870	0.00144646	0.0124443	TNFAIP3/TRAF5/REL/BIRC3/IL1B/SLC20A1/FADD/DDX21/TRIM6/LURAP1L/TRIM68/HMOX1/NLRC3/TNFRSF10B/PELI1/PYCARD	16
BP	GO:0034605	cellular response to heat	7/485	66/18870	0.00149292	0.012811	CDKN1A/THBS1/PTGS2/DNAJB1/IER5/HMOX1/HSPA6	7
BP	GO:0051767	nitric-oxide synthase biosynthetic process	4/485	20/18870	0.00150538	0.0128516	CCL2/NAMPT/KDR/AKAP12	4
BP	GO:0051769	regulation of nitric-oxide synthase biosynthetic process	4/485	20/18870	0.00150538	0.0128516	CCL2/NAMPT/KDR/AKAP12	4
BP	GO:0034103	regulation of tissue remodeling	8/485	85/18870	0.00153168	0.0129133	IL6/IL18/TNFAIP3/CALCA/UBASH3B/MIR17/CSF1R/PDK4	8
BP	GO:0033628	regulation of cell adhesion mediated by integrin	6/485	49/18870	0.001532	0.0129133	LIF/DPP4/SERPINE1/EPHA2/CYP1B1/PLAU	6
BP	GO:0046850	regulation of bone remodeling	6/485	49/18870	0.001532	0.0129133	IL6/TNFAIP3/CALCA/UBASH3B/CSF1R/PDK4	6
BP	GO:0048286	lung alveolus development	6/485	49/18870	0.001532	0.0129133	LIF/FOSL2/ERRFI1/BMP4/ASXL1/KDR	6
BP	GO:0070266	necroptotic process	6/485	49/18870	0.001532	0.0129133	MIR22/BIRC3/FADD/BOK/PELI1/MLKL	6
BP	GO:0046545	development of primary female sexual characteristics	9/485	105/18870	0.00154188	0.0129638	PTX3/TNFAIP6/ADAMTS1/TIPARP/KDR/INHBA/FST/EREG/VEGFA	9
BP	GO:0038061	non-canonical NF-kappaB signal transduction	11/485	148/18870	0.00156534	0.0131279	IL18/MIR21/BCL3/SPHK1/REL/BIRC3/IL1B/NLRC3/TNFRSF10B/NFKB1/PYCARD	11
BP	GO:0032102	negative regulation of response to external stimulus	24/485	481/18870	0.0016101	0.0134693	ZFP36/SOCS3/CCL2/MIR21/DPP4/TNFAIP3/IER3/THBS1/TNFAIP6/THBD/SERPINE1/FBXL2/KLF4/LDLR/METRNL/PLAUR/DUSP1/UBASH3B/OAS1/NLRC3/PLAU/SERPING1/NFKB1/SERPINB2	24
BP	GO:0006956	complement activation	7/485	67/18870	0.00163092	0.0135414	C3/C2/CFB/IL1B/CFI/SERPING1/C4A	7
BP	GO:0038034	signal transduction in absence of ligand	7/485	67/18870	0.00163092	0.0135414	MCL1/IL1B/FADD/INHBA/BOK/BCL2A1/IL7	7
BP	GO:0097192	extrinsic apoptotic signaling pathway in absence of ligand	7/485	67/18870	0.00163092	0.0135414	MCL1/IL1B/FADD/INHBA/BOK/BCL2A1/IL7	7
BP	GO:1901890	positive regulation of cell junction assembly	9/485	106/18870	0.00164753	0.0135445	CBLN2/FLRT3/FLRT2/CLDN1/EPHA2/KDR/SDC4/VEGFA/IL1RAP	9
BP	GO:1990823	response to leukemia inhibitory factor	9/485	106/18870	0.00164753	0.0135445	SOCS3/SOX17/FOSL2/ICAM1/KLF4/PIGA/MAT2A/GCLM/MSC	9
BP	GO:0043372	positive regulation of CD4-positive, alpha-beta T cell differentiation	5/485	34/18870	0.00165164	0.0135445	IL18/MIR21/NFKBIZ/CD83/IL4R	5
BP	GO:0048265	response to pain	5/485	34/18870	0.00165164	0.0135445	TAC1/LPAR5/THBS1/CALCA/GCH1	5
BP	GO:0090183	regulation of kidney development	5/485	34/18870	0.00165164	0.0135445	MYC/BMP4/OSR1/WNT2B/VEGFA	5
BP	GO:0010632	regulation of epithelial cell migration	17/485	295/18870	0.00171951	0.0140604	HBEGF/HAS2/MIR21/ADAMTS9/THBS1/PTGS2/STC1/KLF4/MIR22/GADD45A/EPHA2/KDR/MEOX2/HMOX1/ANXA3/VEGFA/ETS1	17
BP	GO:0030198	extracellular matrix organization	18/485	321/18870	0.00172532	0.0140604	IL6/HAS2/DPP4/PTX3/ADAMTS9/ADAMTS1/BCL3/CRISPLD2/SULF1/FLRT2/CYP1B1/HAS1/CCDC80/OLFML2B/COL1A2/ADAMTS8/COL3A1/BMP2	18
BP	GO:0043123	positive regulation of canonical NF-kappaB signal transduction	13/485	196/18870	0.00172721	0.0140604	TRAF5/REL/BIRC3/IL1B/SLC20A1/FADD/DDX21/TRIM6/LURAP1L/TRIM68/HMOX1/TNFRSF10B/PELI1	13
BP	GO:0016525	negative regulation of angiogenesis	11/485	150/18870	0.00174261	0.0141293	GPR4/MIR21/ADAMTS9/THBS1/ADAMTS1/SERPINE1/KLF4/GADD45A/SULF1/EPHA2/MIR17	11
BP	GO:0009913	epidermal cell differentiation	15/485	245/18870	0.00175652	0.0141293	MAFF/ZFP36/CDKN1A/FOSL2/TGM1/GRHL1/KLF4/NFKBIZ/PPL/ERRFI1/BMP4/EPHA2/UGCG/CDH3/EREG	15
BP	GO:0006664	glycolipid metabolic process	9/485	107/18870	0.0017589	0.0141293	ST3GAL5/CREM/B3GNT5/PIGV/PIGA/UGCG/PGAP1/B4GALT5/GLA	9
BP	GO:0060054	positive regulation of epithelial cell proliferation involved in wound healing	3/485	10/18870	0.00176962	0.0141293	CLDN1/FZD7/LRG1	3
BP	GO:0072203	cell proliferation involved in metanephros development	3/485	10/18870	0.00176962	0.0141293	MYC/EGR1/OSR1	3
BP	GO:1904627	response to phorbol 13-acetate 12-myristate	3/485	10/18870	0.00176962	0.0141293	FOS/FBP1/PCK1	3
BP	GO:1904628	cellular response to phorbol 13-acetate 12-myristate	3/485	10/18870	0.00176962	0.0141293	FOS/FBP1/PCK1	3
BP	GO:2000659	regulation of interleukin-1-mediated signaling pathway	3/485	10/18870	0.00176962	0.0141293	IL6/MIR21/IL1RN	3
BP	GO:0048511	rhythmic process	17/485	296/18870	0.00178222	0.014186	SIK1/EGR1/NFIL3/EGR3/HAS2/CA12/PTX3/TNFAIP6/ADAMTS1/CREM/NAMPT/RBM4B/BHLHE40/KLF10/CYP1B1/INHBA/EREG	17
BP	GO:0043062	extracellular structure organization	18/485	322/18870	0.00178525	0.014186	IL6/HAS2/DPP4/PTX3/ADAMTS9/ADAMTS1/BCL3/CRISPLD2/SULF1/FLRT2/CYP1B1/HAS1/CCDC80/OLFML2B/COL1A2/ADAMTS8/COL3A1/BMP2	18
BP	GO:0034104	negative regulation of tissue remodeling	4/485	21/18870	0.00182217	0.0144106	IL6/TNFAIP3/CALCA/UBASH3B	4
BP	GO:0071498	cellular response to fluid shear stress	4/485	21/18870	0.00182217	0.0144106	HAS2/PTGS2/KLF4/TFPI2	4
BP	GO:0002456	T cell mediated immunity	10/485	129/18870	0.00184727	0.0145745	IL6/ARID5A/IL18/ICAM1/NFKBIZ/BTN3A3/IL1B/FADD/RAB27A/BTN3A2	10
BP	GO:1903509	liposaccharide metabolic process	9/485	108/18870	0.00187622	0.0147679	ST3GAL5/CREM/B3GNT5/PIGV/PIGA/UGCG/PGAP1/B4GALT5/GLA	9
BP	GO:0060544	regulation of necroptotic process	5/485	35/18870	0.00188678	0.014816	MIR22/BIRC3/FADD/BOK/PELI1	5
BP	GO:0033627	cell adhesion mediated by integrin	8/485	88/18870	0.00191385	0.0149932	LIF/DPP4/ICAM1/SERPINE1/ITGA5/EPHA2/CYP1B1/PLAU	8
BP	GO:2000181	negative regulation of blood vessel morphogenesis	11/485	152/18870	0.00193593	0.0150998	GPR4/MIR21/ADAMTS9/THBS1/ADAMTS1/SERPINE1/KLF4/GADD45A/SULF1/EPHA2/MIR17	11
BP	GO:0032835	glomerulus development	7/485	69/18870	0.00193652	0.0150998	EGR1/GPR4/AQP1/SULF1/BMP4/OSR1/ASXL1	7
BP	GO:0045621	positive regulation of lymphocyte differentiation	10/485	130/18870	0.00195644	0.0152195	PNP/IL18/EGR3/MIR21/NFKBIZ/CD83/IL4R/IL15RA/IL7/PCK1	10
BP	GO:0043409	negative regulation of MAPK cascade	12/485	176/18870	0.00203681	0.0157143	MYC/ATF3/DUSP5/LIF/DUSP2/RGS2/MIR21/IL1B/DUSP1/DUSP6/DACT1/BMP2	12
BP	GO:0030183	B cell differentiation	11/485	153/18870	0.00203894	0.0157143	IL6/FOSL2/GPR183/BLNK/BCL3/NFKBIZ/INHBA/KLF6/DOCK11/CLCF1/IL7	11
BP	GO:0043535	regulation of blood vessel endothelial cell migration	11/485	153/18870	0.00203894	0.0157143	THBS1/PTGS2/KLF4/MIR22/GADD45A/EPHA2/KDR/MEOX2/HMOX1/VEGFA/ETS1	11
BP	GO:1901343	negative regulation of vasculature development	11/485	153/18870	0.00203894	0.0157143	GPR4/MIR21/ADAMTS9/THBS1/ADAMTS1/SERPINE1/KLF4/GADD45A/SULF1/EPHA2/MIR17	11
BP	GO:0014910	regulation of smooth muscle cell migration	8/485	89/18870	0.00205669	0.0157781	NR4A3/HAS2/MIR21/ADAMTS1/SERPINE1/BMP4/CYP1B1/PLAU	8
BP	GO:0046849	bone remodeling	8/485	89/18870	0.00205669	0.0157781	IL6/TNFAIP3/CALCA/EPHA2/UBASH3B/CSF1R/IL7/PDK4	8
BP	GO:0045786	negative regulation of cell cycle	21/485	407/18870	0.00207049	0.0158475	CDKN1A/BTG2/NR4A1/CCL2/LIF/MIR21/IER3/PTGS2/KLF4/BMP4/DUSP1/DCUN1D3/INHBA/FAM107A/RBBP8/ETAA1/DACT1/GMNN/NABP1/CEBPA/BMP2	21
BP	GO:0043154	negative regulation of cysteine-type endopeptidase activity involved in apoptotic process	6/485	52/18870	0.00209074	0.0158928	THBS1/AQP1/KLF4/PLAUR/MIR17/VEGFA	6
BP	GO:0046638	positive regulation of alpha-beta T cell differentiation	6/485	52/18870	0.00209074	0.0158928	PNP/IL18/MIR21/NFKBIZ/CD83/IL4R	6
BP	GO:1904707	positive regulation of vascular associated smooth muscle cell proliferation	6/485	52/18870	0.00209074	0.0158928	NR4A3/MIR21/ADAMTS1/JUN/LDLRAP1/MIR17	6
BP	GO:1901184	regulation of ERBB signaling pathway	7/485	70/18870	0.00210505	0.0159652	GPRC5A/MIR21/WDR54/BCAR3/ERRFI1/DGKD/PLAUR	7
BP	GO:0014812	muscle cell migration	9/485	110/18870	0.0021296	0.0160607	NR4A3/HAS2/MIR21/ADAMTS1/SERPINE1/BMP4/CYP1B1/PLAU/PLEKHO1	9
BP	GO:0042116	macrophage activation	9/485	110/18870	0.0021296	0.0160607	IL6/THBS1/SPHK1/IL1RL1/LDLR/CX3CR1/IL4R/CEBPA/C5AR1	9
BP	GO:0030216	keratinocyte differentiation	12/485	177/18870	0.00213549	0.0160607	ZFP36/CDKN1A/FOSL2/TGM1/GRHL1/NFKBIZ/PPL/ERRFI1/EPHA2/UGCG/CDH3/EREG	12
CC	GO:0045334	clathrin-coated endocytic vesicle	8/497	92/19886	0.00213688	0.0656037	LRP2/HBEGF/AREG/LDLR/LDLRAP1/VAMP8/EREG/CEMIP	8
BP	GO:0045017	glycerolipid biosynthetic process	15/485	250/18870	0.00213694	0.0160607	SOCS3/SIK1/ITPKC/C3/ALOX15/CISH/PIGV/LDLR/SOCS2/PIGA/DGKD/PCK2/PGAP1/PCK1/RAB38	15
BP	GO:0034614	cellular response to reactive oxygen species	11/485	154/18870	0.00214636	0.0160951	IL6/MIR21/FOS/TNFAIP3/JUN/AQP1/SPHK1/KDM6B/GCH1/CYP1B1/MIR17	11
BP	GO:0045624	positive regulation of T-helper cell differentiation	4/485	22/18870	0.00218234	0.0163282	IL18/MIR21/NFKBIZ/IL4R	4
BP	GO:0018108	peptidyl-tyrosine phosphorylation	16/485	276/18870	0.00218746	0.0163298	SOCS3/IL6/GPRC5A/LIF/IL18/HBEGF/AREG/CSF3/ITGA5/ERRFI1/KDR/CLCF1/PDGFC/VEGFA/CSF1R/IL7	16
CC	GO:1905370	serine-type endopeptidase complex	3/497	11/19886	0.00220437	0.0656037	THBD/PLAUR/PLAU	3
BP	GO:0001938	positive regulation of endothelial cell proliferation	9/485	111/18870	0.00226613	0.0168416	NR4A1/EGR3/MIR21/BMP4/KDR/CCL11/HMOX1/VEGFA/LRG1	9
BP	GO:1902106	negative regulation of leukocyte differentiation	9/485	111/18870	0.00226613	0.0168416	MYC/MIR21/TNFAIP6/IRF1/BMP4/IL4R/UBASH3B/INHBA/FSTL3	9
BP	GO:0002443	leukocyte mediated immunity	23/485	466/18870	0.00229175	0.016994	IL6/NR4A3/ARID5A/IL18/ICAM1/C3/BCL3/NFKBIZ/C2/BTN3A3/IL1B/VAMP8/CX3CR1/FADD/DDX21/IL4R/CFI/RAB27A/BTN3A2/ANXA3/CLCF1/SERPING1/C4A	23
BP	GO:0048260	positive regulation of receptor-mediated endocytosis	6/485	53/18870	0.00230743	0.0169967	SELE/C3/SERPINE1/DGKD/LDLRAP1/VEGFA	6
BP	GO:0071622	regulation of granulocyte chemotaxis	6/485	53/18870	0.00230743	0.0169967	DPP4/THBS1/TNFAIP6/CXCL8/CSF1R/C5AR1	6
BP	GO:2001238	positive regulation of extrinsic apoptotic signaling pathway	6/485	53/18870	0.00230743	0.0169967	ATF3/THBS1/TNFRSF12A/FADD/INHBA/PYCARD	6
BP	GO:0018212	peptidyl-tyrosine modification	16/485	278/18870	0.00235144	0.0172827	SOCS3/IL6/GPRC5A/LIF/IL18/HBEGF/AREG/CSF3/ITGA5/ERRFI1/KDR/CLCF1/PDGFC/VEGFA/CSF1R/IL7	16
BP	GO:0060021	roof of mouth development	8/485	91/18870	0.00236748	0.0173622	CSRNP1/BNC2/TIPARP/OSR1/MEOX2/INHBA/INSIG1/MSC	8
BP	GO:0001547	antral ovarian follicle growth	3/485	11/18870	0.00238703	0.0174288	PTX3/TNFAIP6/EREG	3
BP	GO:1903897	regulation of PERK-mediated unfolded protein response	3/485	11/18870	0.00238703	0.0174288	PPP1R15A/PPP1R15B/BOK	3
BP	GO:0001894	tissue homeostasis	16/485	279/18870	0.00243719	0.0177174	IL6/FOSL2/TNFAIP3/PTGS2/CALCA/NFKBIZ/CLDN1/UBASH3B/RBP4/CDH3/VEGFA/CSF1R/IL7/COL3A1/PDK4/SERPINA3	16
BP	GO:0060249	anatomical structure homeostasis	16/485	279/18870	0.00243719	0.0177174	IL6/FOSL2/TNFAIP3/PTGS2/CALCA/NFKBIZ/CLDN1/UBASH3B/RBP4/CDH3/VEGFA/CSF1R/IL7/COL3A1/PDK4/SERPINA3	16
CC	GO:0030669	clathrin-coated endocytic vesicle membrane	7/497	74/19886	0.00248063	0.0676733	LRP2/HBEGF/AREG/LDLR/LDLRAP1/VAMP8/EREG	7
BP	GO:0050873	brown fat cell differentiation	6/485	54/18870	0.0025406	0.0184289	RGS2/PIM1/PTGS2/METRNL/CEBPA/LRG1	6
BP	GO:0022408	negative regulation of cell-cell adhesion	13/485	205/18870	0.00256347	0.0185357	MIR21/IL1RN/IRF1/CD274/KLF4/BMP4/IL4R/UBASH3B/PLA2G2A/PELI1/SDC4/VEGFA/BMP2	13
BP	GO:0045580	regulation of T cell differentiation	12/485	181/18870	0.00257011	0.0185357	JUNB/PNP/IL18/EGR3/MIR21/IRF1/NFKBIZ/CD83/BMP4/IL4R/IL7/PCK1	12
BP	GO:0002758	innate immune response-activating signaling pathway	15/485	255/18870	0.00258348	0.0185357	FOSL1/TNFAIP3/IRF1/FBXL2/NFKBIZ/RNF135/BIRC3/OAS1/NLRC3/MIR17/PELI1/TRIL/TLR5/PYCARD/COLEC12	15
BP	GO:0034599	cellular response to oxidative stress	15/485	255/18870	0.00258348	0.0185357	IL6/NR4A2/MIR21/FOS/TNFAIP3/JUN/AQP1/SPHK1/KDM6B/GCH1/CYP1B1/DAPK1/GPX8/HMOX1/MIR17	15
MF	GO:0070700	BMP receptor binding	3/489	11/18496	0.00258663	0.0537294	BMP4/PYCARD/BMP2	3
BP	GO:0002689	negative regulation of leukocyte chemotaxis	4/485	23/18870	0.00258872	0.0185357	CCL2/DPP4/TNFAIP6/DUSP1	4
BP	GO:0061042	vascular wound healing	4/485	23/18870	0.00258872	0.0185357	TNFAIP3/SERPINE1/KDR/VEGFA	4
BP	GO:0009247	glycolipid biosynthetic process	7/485	73/18870	0.00267925	0.0191017	ST3GAL5/B3GNT5/PIGV/PIGA/UGCG/PGAP1/B4GALT5	7
BP	GO:0035914	skeletal muscle cell differentiation	7/485	73/18870	0.00267925	0.0191017	MAFF/BTG2/ATF3/NR4A1/EGR1/FOS/EGR2	7
BP	GO:0098781	ncRNA transcription	10/485	136/18870	0.00272582	0.0193922	MYC/EGR1/FOSL1/FOS/JUN/KLF4/ELL2/BMP4/ETS1/BMP2	10
BP	GO:0002335	mature B cell differentiation	5/485	38/18870	0.00273906	0.0194034	IL6/GPR183/BCL3/NFKBIZ/DOCK11	5
BP	GO:1990776	response to angiotensin	5/485	38/18870	0.00273906	0.0194034	PTGS2/CA2/INHBA/NFKB1/COL3A1	5
BP	GO:0002757	immune response-activating signaling pathway	23/485	473/18870	0.00276114	0.0195183	NR4A3/FOSL1/FOSL2/TNFAIP3/IRF1/BLNK/FBXL2/NFKBIZ/RNF135/BIRC3/BTN3A3/OAS1/NLRC3/BTN3A2/PDE4B/MIR17/PELI1/TRIL/TLR5/NFKB1/PYCARD/C5AR1/COLEC12	23
BP	GO:0002043	blood vessel endothelial cell proliferation involved in sprouting angiogenesis	6/485	55/18870	0.00279102	0.0196461	MIR21/THBS1/BMP4/EPHA2/HMOX1/VEGFA	6
BP	GO:0002455	humoral immune response mediated by circulating immunoglobulin	6/485	55/18870	0.00279102	0.0196461	C3/BCL3/C2/CFI/SERPING1/C4A	6
MF	GO:0070696	transmembrane receptor protein serine/threonine kinase binding	4/489	23/18496	0.00286631	0.0576182	BMP4/INHBA/PYCARD/BMP2	4
BP	GO:0006898	receptor-mediated endocytosis	15/485	258/18870	0.00288663	0.0202092	SELE/LRP2/DPP4/C3/CXCL8/SERPINE1/WDR54/ARC/LDLR/DGKD/RSPO1/LDLRAP1/MIR17/MARCO/VEGFA	15
BP	GO:0006023	aminoglycan biosynthetic process	7/485	74/18870	0.00289514	0.0202092	HAS2/IL1B/CHSY1/HAS1/B4GALT5/CEMIP/NFKB1	7
BP	GO:0046637	regulation of alpha-beta T cell differentiation	7/485	74/18870	0.00289514	0.0202092	JUNB/PNP/IL18/MIR21/NFKBIZ/CD83/IL4R	7
BP	GO:0001656	metanephros development	8/485	94/18870	0.00290136	0.0202092	MYC/EGR1/LIF/SOX17/AQP1/BMP4/OSR1/RDH10	8
BP	GO:0009791	post-embryonic development	8/485	94/18870	0.00290136	0.0202092	CSRNP1/NR4A2/TIPARP/KLF4/BMP4/KDR/AGO2/VEGFA	8
BP	GO:0021871	forebrain regionalization	4/485	24/18870	0.00304414	0.0208201	BMP4/PGAP1/WNT2B/BMP2	4
BP	GO:0034138	toll-like receptor 3 signaling pathway	4/485	24/18870	0.00304414	0.0208201	TNFAIP3/OAS1/PELI1/COLEC12	4
BP	GO:0060571	morphogenesis of an epithelial fold	4/485	24/18870	0.00304414	0.0208201	SULF1/BMP4/RDH10/WNT2B	4
BP	GO:2000209	regulation of anoikis	4/485	24/18870	0.00304414	0.0208201	SIK1/ITGA5/MCL1/PDK4	4
BP	GO:0002062	chondrocyte differentiation	9/485	116/18870	0.00305669	0.0208201	ARID5A/FOSL2/SULF1/BMP4/OSR1/CHSY1/WNT2B/COL3A1/BMP2	9
BP	GO:0045582	positive regulation of T cell differentiation	9/485	116/18870	0.00305669	0.0208201	PNP/IL18/EGR3/MIR21/NFKBIZ/CD83/IL4R/IL7/PCK1	9
BP	GO:0046634	regulation of alpha-beta T cell activation	9/485	116/18870	0.00305669	0.0208201	JUNB/PNP/IL18/MIR21/IRF1/CD274/NFKBIZ/CD83/IL4R	9
BP	GO:0001541	ovarian follicle development	6/485	56/18870	0.00305946	0.0208201	PTX3/TNFAIP6/KDR/INHBA/EREG/VEGFA	6
BP	GO:0043370	regulation of CD4-positive, alpha-beta T cell differentiation	6/485	56/18870	0.00305946	0.0208201	JUNB/IL18/MIR21/NFKBIZ/CD83/IL4R	6
BP	GO:0052372	modulation by symbiont of entry into host	6/485	56/18870	0.00305946	0.0208201	CH25H/PTX3/CXCL8/LY6E/TRIM6/TRIM68	6
BP	GO:0010762	regulation of fibroblast migration	5/485	39/18870	0.0030766	0.0208201	THBS1/AQP1/HAS1/SDC4/AKAP12	5
BP	GO:0043620	regulation of DNA-templated transcription in response to stress	5/485	39/18870	0.0030766	0.0208201	ATF3/EGR1/JUN/HMOX1/VEGFA	5
BP	GO:0071548	response to dexamethasone	5/485	39/18870	0.0030766	0.0208201	AQP1/CLDN1/PCK2/CYP1B1/PCK1	5
BP	GO:0097242	amyloid-beta clearance	5/485	39/18870	0.0030766	0.0208201	LRP2/C3/LDLR/MARCO/C5AR1	5
BP	GO:1902074	response to salt	19/485	366/18870	0.0030977	0.0209203	FOSB/MYRF/JUNB/EGR1/ITPKC/FOS/THBS1/PTGS2/ALOX15/SYT4/KCNB1/CLDN1/IL1B/SYT17/FADD/PANX1/GCLM/CEBPA/CPNE2	19
BP	GO:0022605	mammalian oogenesis stage	3/485	12/18870	0.00312235	0.0210016	PTX3/TNFAIP6/EREG	3
BP	GO:0070327	thyroid hormone transport	3/485	12/18870	0.00312235	0.0210016	SLC7A5/SLCO4A1/SLC16A10	3
MF	GO:0019838	growth factor binding	10/489	135/18496	0.00315787	0.0592986	LRP2/IL1RN/THBS1/HTRA1/EPHA2/KDR/CSF1R/COL1A2/COL3A1/OSMR	10
BP	GO:0071695	anatomical structure maturation	15/485	261/18870	0.00321854	0.0216049	CDKN1A/RND1/NR4A2/BNC1/C3/KCNB1/EPB42/CX3CR1/KDR/CDH3/B4GALT5/EREG/VEGFA/CEBPA/BMP2	15
BP	GO:0040013	negative regulation of locomotion	21/485	423/18870	0.00326068	0.0218437	CCL2/MIR21/DPP4/ADAMTS9/THBS1/TNFAIP6/SERPINE1/STC1/KLF4/MIR22/GADD45A/SULF1/BMP4/CYP1B1/CX3CR1/DUSP1/MEOX2/HAS1/HMOX1/COL3A1/ADORA3	21
BP	GO:0014909	smooth muscle cell migration	8/485	96/18870	0.00330639	0.0221055	NR4A3/HAS2/MIR21/ADAMTS1/SERPINE1/BMP4/CYP1B1/PLAU	8
BP	GO:0007548	sex differentiation	16/485	288/18870	0.00333265	0.0222137	LRP2/PTX3/TNFAIP6/ADAMTS1/TIPARP/CYP1B1/OSR1/KDR/RBP4/INHBA/FST/BOK/RDH10/WNT2B/EREG/VEGFA	16
BP	GO:0051098	regulation of binding	15/485	262/18870	0.00333591	0.0222137	CDKN1A/XIRP1/SLPI/PTPRF/JUN/BCL3/CSF3/BMP4/PLAUR/LDLRAP1/TRIM6/IFIT1/DACT1/GMNN/BMP2	15
BP	GO:0061900	glial cell activation	6/485	57/18870	0.00334673	0.0222412	IL6/SPHK1/LDLR/IL1B/CX3CR1/C5AR1	6
BP	GO:0008360	regulation of cell shape	10/485	140/18870	0.00336113	0.0222924	CCL2/MIR21/EPB42/ARHGAP18/KDR/CCL11/CCL7/VEGFA/CSF1R/PLEKHO1	10
MF	GO:0019957	C-C chemokine binding	4/489	24/18496	0.00336862	0.0592986	ZFP36/CX3CR1/ACKR1/ACKR4	4
MF	GO:0035497	cAMP response element binding	3/489	12/18496	0.00338158	0.0592986	NR4A3/JUN/CREB5	3
MF	GO:0019003	GDP binding	7/489	74/18496	0.00338192	0.0592986	RAB27B/GEM/RERG/RAB17/GNAI1/RAB27A/PCK1	7
BP	GO:0002833	positive regulation of response to biotic stimulus	19/485	369/18870	0.00338563	0.0224103	FOSL1/TNFAIP3/IRF1/FBXL2/CD274/NFKBIZ/RNF135/BIRC3/FADD/TRIM6/OAS1/NLRC3/MIR17/EREG/PELI1/TRIL/TLR5/PYCARD/COLEC12	19
MF	GO:0004857	enzyme inhibitor activity	20/489	386/18496	0.00342569	0.0592986	CDKN1A/SOCS3/ITPRIP/RGS2/SLPI/C3/THBS1/SERPINE1/TFPI2/ANXA4/SCG5/DDX21/RARRES1/SERPINB1/ANXA9/ANXA3/SERPING1/C4A/SERPINB2/SERPINA3	20
BP	GO:0032570	response to progesterone	5/485	40/18870	0.00344314	0.0227007	FOSB/FOSL1/FOS/THBS1/CYP1B1	5
BP	GO:0062098	regulation of programmed necrotic cell death	5/485	40/18870	0.00344314	0.0227007	MIR22/BIRC3/FADD/BOK/PELI1	5
BP	GO:0045089	positive regulation of innate immune response	18/485	343/18870	0.00351315	0.0231165	FOSL1/TNFAIP3/IRF1/FBXL2/NFKBIZ/RNF135/BIRC3/FADD/TRIM6/OAS1/NLRC3/MIR17/EREG/PELI1/TRIL/TLR5/PYCARD/COLEC12	18
BP	GO:1903035	negative regulation of response to wounding	8/485	97/18870	0.00352469	0.0231467	THBS1/THBD/SERPINE1/PLAUR/UBASH3B/PLAU/SERPING1/SERPINB2	8
BP	GO:0046697	decidualization	4/485	25/18870	0.00355134	0.02323	JUNB/LIF/PTGS2/STC1	4
BP	GO:0048143	astrocyte activation	4/485	25/18870	0.00355134	0.02323	IL6/LDLR/IL1B/C5AR1	4
BP	GO:0042098	T cell proliferation	13/485	213/18870	0.00356151	0.0232509	IL6/PNP/IL18/MIR21/IRF1/CD274/BMP4/IL1B/FADD/PLA2G2A/PELI1/SDC4/PYCARD	13
BP	GO:1903036	positive regulation of response to wounding	7/485	77/18870	0.0036233	0.023608	HBEGF/MIR21/THBS1/THBD/SERPINE1/CLDN1/PLAU	7
BP	GO:0045428	regulation of nitric oxide biosynthetic process	6/485	58/18870	0.0036536	0.0237126	PTX3/PTGS2/KLF4/IL1B/CX3CR1/GLA	6
BP	GO:0048008	platelet-derived growth factor receptor signaling pathway	6/485	58/18870	0.0036536	0.0237126	CSRNP1/NR4A3/TIPARP/PDGFRL/PDGFC/VEGFA	6
CC	GO:1905286	serine-type peptidase complex	3/497	13/19886	0.00368131	0.0927035	THBD/PLAUR/PLAU	3
BP	GO:0002064	epithelial cell development	13/485	214/18870	0.00370583	0.0240048	CDKN1A/GPR4/FOSL2/ICAM1/STC1/BMP4/CLDN1/IL1B/EPHA2/ASXL1/KDR/VEGFA/CEBPA	13
BP	GO:0043393	regulation of protein binding	10/485	142/18870	0.00372013	0.0240506	CDKN1A/XIRP1/SLPI/PTPRF/CSF3/BMP4/LDLRAP1/IFIT1/DACT1/BMP2	10
BP	GO:0060993	kidney morphogenesis	8/485	98/18870	0.00375399	0.0242225	MYC/LIF/BMP4/OSR1/ASXL1/WNT2B/VEGFA/BMP2	8
BP	GO:0072009	nephron epithelium development	9/485	120/18870	0.00383375	0.0246344	MYC/LIF/AQP1/BMP4/OSR1/ASXL1/WNT2B/VEGFA/BMP2	9
BP	GO:0072210	metanephric nephron development	5/485	41/18870	0.00384002	0.0246344	EGR1/LIF/AQP1/BMP4/OSR1	5
BP	GO:1904994	regulation of leukocyte adhesion to vascular endothelial cell	5/485	41/18870	0.00384002	0.0246344	IL6/SELE/MIR21/KLF4/ETS1	5
BP	GO:0097193	intrinsic apoptotic signaling pathway	17/485	319/18870	0.00385209	0.0246347	CDKN1A/MYC/MIR21/IER3/BCL3/PTGS2/PPP1R15A/MCL1/CRIP1/PLAUR/EPHA2/CYP1B1/BOK/TNFRSF10B/MIR17/BCL2A1/PYCARD	17
BP	GO:0060348	bone development	13/485	215/18870	0.00385486	0.0246347	BNC2/HAS2/FOSL2/STC1/SULF1/BMP4/ASXL1/CHSY1/KDR/INSIG1/PDGFC/COL3A1/BMP2	13
BP	GO:2000514	regulation of CD4-positive, alpha-beta T cell activation	7/485	78/18870	0.00389454	0.0248406	JUNB/IL18/MIR21/CD274/NFKBIZ/CD83/IL4R	7
BP	GO:1901653	cellular response to peptide	19/485	374/18870	0.00391493	0.0248753	SOCS3/NR4A3/NR4A1/NR4A2/ICAM1/FOS/BCAR3/SOCS2/IL1B/PCK2/CYP1B1/MGARP/CA2/FBP1/INHBA/INSIG1/NFKB1/PCK1/PDK4	19
BP	GO:0042445	hormone metabolic process	14/485	241/18870	0.00395515	0.0248753	EGR1/HSD17B6/BCHE/DPP4/DISP1/TIPARP/SCG5/CYP1B1/RBP4/RDH10/ADH1C/NFKB1/BMP2/SLC16A10	14
BP	GO:0010718	positive regulation of epithelial to mesenchymal transition	6/485	59/18870	0.00398086	0.0248753	IL6/MIR21/BMP4/IL1B/LRG1/BMP2	6
BP	GO:0031638	zymogen activation	6/485	59/18870	0.00398086	0.0248753	THBS1/THBD/SERPINE1/PLAUR/FADD/PLAU	6
BP	GO:0002357	defense response to tumor cell	3/485	13/18870	0.00398218	0.0248753	KLF4/DAPK1/TNFRSF10B	3
BP	GO:0036462	TRAIL-activated apoptotic signaling pathway	3/485	13/18870	0.00398218	0.0248753	ATF3/FADD/TNFRSF10B	3
BP	GO:0045986	negative regulation of smooth muscle contraction	3/485	13/18870	0.00398218	0.0248753	RGS2/PTGS2/CALCA	3
BP	GO:0048711	positive regulation of astrocyte differentiation	3/485	13/18870	0.00398218	0.0248753	LIF/CLCF1/BMP2	3
BP	GO:0060213	positive regulation of nuclear-transcribed mRNA poly(A) tail shortening	3/485	13/18870	0.00398218	0.0248753	ZFP36/BTG2/AGO2	3
BP	GO:0070486	leukocyte aggregation	3/485	13/18870	0.00398218	0.0248753	NR4A3/HAS2/IL1B	3
BP	GO:0072683	T cell extravasation	3/485	13/18870	0.00398218	0.0248753	CCL2/ICAM1/FADD	3
BP	GO:0010596	negative regulation of endothelial cell migration	8/485	99/18870	0.00399466	0.0249066	MIR21/ADAMTS9/THBS1/STC1/KLF4/MIR22/GADD45A/MEOX2	8
BP	GO:0030509	BMP signaling pathway	11/485	167/18870	0.00401022	0.0249568	EGR1/LRP2/MIR21/TNFAIP6/HTRA1/SULF1/BMP4/KDR/FST/FSTL3/BMP2	11
BP	GO:0051592	response to calcium ion	10/485	144/18870	0.00410887	0.0254065	FOSB/JUNB/ITPKC/FOS/THBS1/ALOX15/SYT4/KCNB1/SYT17/CPNE2	10
BP	GO:0002726	positive regulation of T cell cytokine production	4/485	26/18870	0.00411299	0.0254065	IL6/ARID5A/IL18/IL1B	4
BP	GO:1904996	positive regulation of leukocyte adhesion to vascular endothelial cell	4/485	26/18870	0.00411299	0.0254065	IL6/SELE/MIR21/ETS1	4
BP	GO:1905523	positive regulation of macrophage migration	4/485	26/18870	0.00411299	0.0254065	THBS1/CX3CR1/CSF1R/C5AR1	4
BP	GO:0071466	cellular response to xenobiotic stimulus	12/485	192/18870	0.00414709	0.0255697	MYC/BCHE/AADAC/SLC28A3/AOX1/GSTA4/IL1B/CYP1B1/FBP1/PDE4B/CD69/FMO1	12
BP	GO:0045685	regulation of glial cell differentiation	7/485	79/18870	0.00418092	0.0256832	IL6/MYRF/LIF/EGR2/LDLR/CLCF1/BMP2	7
BP	GO:0072088	nephron epithelium morphogenesis	7/485	79/18870	0.00418092	0.0256832	MYC/LIF/BMP4/OSR1/WNT2B/VEGFA/BMP2	7
BP	GO:0071901	negative regulation of protein serine/threonine kinase activity	8/485	100/18870	0.00424705	0.0259811	CDKN1A/RGS2/GADD45A/IL1B/DUSP1/PYCARD/CEBPA/BMP2	8
BP	GO:0072080	nephron tubule development	8/485	100/18870	0.00424705	0.0259811	MYC/LIF/AQP1/BMP4/OSR1/WNT2B/VEGFA/BMP2	8
BP	GO:0001709	cell fate determination	5/485	42/18870	0.0042686	0.0259811	SOX17/KLF4/MCL1/BMP4/IFRD1	5
BP	GO:0006958	complement activation, classical pathway	5/485	42/18870	0.0042686	0.0259811	C3/C2/CFI/SERPING1/C4A	5
BP	GO:0032733	positive regulation of interleukin-10 production	5/485	42/18870	0.0042686	0.0259811	IL6/BCL3/CD274/CD83/PYCARD	5
BP	GO:0022612	gland morphogenesis	9/485	122/18870	0.00427624	0.0259811	IL6/AREG/TNFAIP3/CRIP1/SULF1/BMP4/EPHA2/NFKB1/CSF1R	9
MF	GO:0004859	phospholipase inhibitor activity	3/489	13/18496	0.00431044	0.0725969	ANXA4/ANXA9/ANXA3	3
BP	GO:0050921	positive regulation of chemotaxis	10/485	145/18870	0.00431491	0.0261604	IL6/THBS1/CXCL8/SERPINE1/CX3CR1/KDR/CCL7/VEGFA/CSF1R/C5AR1	10
BP	GO:0080164	regulation of nitric oxide metabolic process	6/485	60/18870	0.00432933	0.0261604	PTX3/PTGS2/KLF4/IL1B/CX3CR1/GLA	6
BP	GO:0097300	programmed necrotic cell death	6/485	60/18870	0.00432933	0.0261604	MIR22/BIRC3/FADD/BOK/PELI1/MLKL	6
BP	GO:0009952	anterior/posterior pattern specification	13/485	219/18870	0.00450026	0.027144	BTG2/SOX17/HES4/HOXB2/BHLHE40/ARC/ETS2/BMP4/OSR1/MEOX2/PGAP1/WNT2B/BMP2	13
BP	GO:0048469	cell maturation	12/485	195/18870	0.00469043	0.0280821	CDKN1A/RND1/NR4A2/BNC1/C3/KCNB1/EPB42/KDR/B4GALT5/EREG/VEGFA/CEBPA	12
BP	GO:1903670	regulation of sprouting angiogenesis	6/485	61/18870	0.00469979	0.0280821	ADAMTS9/THBS1/KLF4/ITGA5/MIR17/VEGFA	6
BP	GO:2000351	regulation of endothelial cell apoptotic process	6/485	61/18870	0.00469979	0.0280821	CCL2/ICAM1/TNFAIP3/THBS1/SERPINE1/KDR	6
BP	GO:0030522	intracellular receptor signaling pathway	18/485	353/18870	0.00472906	0.0280821	NR4A3/NR4A1/NR4A2/TNFAIP3/PIM1/FBXL2/ALOX15/RNF135/BIRC3/MN1/ASXL1/OAS1/TRIM68/NLRC3/PELI1/PYCARD/BMP2/COLEC12	18
BP	GO:0019432	triglyceride biosynthetic process	5/485	43/18870	0.00473022	0.0280821	SIK1/C3/LDLR/PCK2/PCK1	5
BP	GO:0045622	regulation of T-helper cell differentiation	5/485	43/18870	0.00473022	0.0280821	JUNB/IL18/MIR21/NFKBIZ/IL4R	5
BP	GO:0060443	mammary gland morphogenesis	5/485	43/18870	0.00473022	0.0280821	AREG/BMP4/EPHA2/NFKB1/CSF1R	5
BP	GO:0031639	plasminogen activation	4/485	27/18870	0.00473169	0.0280821	THBS1/SERPINE1/PLAUR/PLAU	4
BP	GO:0042104	positive regulation of activated T cell proliferation	4/485	27/18870	0.00473169	0.0280821	IL18/MIR21/FADD/PYCARD	4
BP	GO:0002761	regulation of myeloid leukocyte differentiation	9/485	124/18870	0.0047576	0.0281856	MYC/LIF/FOS/TNFAIP6/KLF10/FADD/UBASH3B/INHBA/FSTL3	9
BP	GO:0051960	regulation of nervous system development	22/485	466/18870	0.00477952	0.0282652	IL6/MYRF/BTG2/EFNB3/SLC7A5/LRP2/CBLN2/LIF/FLRT3/EGR2/SYT4/BHLHE40/LDLR/FLRT2/IL1B/CX3CR1/CCL11/CLCF1/VEGFA/IL1RAP/IFRD1/BMP2	22
BP	GO:0072028	nephron morphogenesis	7/485	81/18870	0.00480117	0.0283428	MYC/LIF/BMP4/OSR1/WNT2B/VEGFA/BMP2	7
BP	GO:0007517	muscle organ development	18/485	354/18870	0.00486766	0.0286845	MAFF/BTG2/ATF3/NR4A1/EGR1/LRP2/LIF/HBEGF/EGR3/DISP1/FOS/EGR2/BMP4/MEOX2/TEAD4/COL3A1/BMP2/MSC	18
MF	GO:0001618	virus receptor activity	7/489	79/18496	0.0048689	0.0792558	EFNB3/DPP4/ICAM1/ITGA5/LDLR/CLDN1/EPHA2	7
BP	GO:0045926	negative regulation of growth	14/485	247/18870	0.00490709	0.0288658	CDKN1A/SOX17/RGS2/MT2A/RERG/SOCS2/MT1M/DCUN1D3/MT1H/RBP4/FBP1/MT1X/INHBA/IFRD1	14
MF	GO:0004714	transmembrane receptor protein tyrosine kinase activity	6/489	60/18496	0.00496018	0.0792558	EFNB3/EPHB6/EPHA2/KDR/PDGFRL/CSF1R	6
BP	GO:0034392	negative regulation of smooth muscle cell apoptotic process	3/485	14/18870	0.00497236	0.0290955	SLC7A5/MIR21/MIR17	3
BP	GO:0070262	peptidyl-serine dephosphorylation	3/485	14/18870	0.00497236	0.0290955	PPP1R15A/PPP1R15B/DUSP1	3
BP	GO:0071472	cellular response to salt stress	3/485	14/18870	0.00497236	0.0290955	AQP1/FBP1/PCK1	3
BP	GO:0009408	response to heat	8/485	103/18870	0.00507834	0.0295317	CDKN1A/THBS1/PTGS2/CALCA/DNAJB1/IER5/HMOX1/HSPA6	8
BP	GO:0097306	cellular response to alcohol	8/485	103/18870	0.00507834	0.0295317	SPIDR/FOS/SGK1/CYP1B1/GNAI1/FBP1/INHBA/PCK1	8
BP	GO:1901655	cellular response to ketone	8/485	103/18870	0.00507834	0.0295317	FOS/AQP1/SGK1/PCK2/CYP1B1/GNAI1/FBP1/PCK1	8
BP	GO:0045930	negative regulation of mitotic cell cycle	14/485	248/18870	0.00508238	0.0295317	CDKN1A/BTG2/CCL2/MIR21/IER3/KLF4/BMP4/DUSP1/DCUN1D3/INHBA/FAM107A/RBBP8/DACT1/NABP1	14
BP	GO:0090303	positive regulation of wound healing	6/485	62/18870	0.00509305	0.0295421	HBEGF/THBS1/THBD/SERPINE1/CLDN1/PLAU	6
BP	GO:0051341	regulation of oxidoreductase activity	7/485	82/18870	0.00513609	0.02974	MIR21/HP/GCH1/IL1B/CDH3/GLA/NFKB1	7
MF	GO:0004866	endopeptidase inhibitor activity	11/489	168/18496	0.00516375	0.0792996	SLPI/C3/THBS1/SERPINE1/TFPI2/RARRES1/SERPINB1/SERPING1/C4A/SERPINB2/SERPINA3	11
MF	GO:0140272	exogenous protein binding	7/489	80/18496	0.00521743	0.0792996	EFNB3/DPP4/ICAM1/ITGA5/LDLR/CLDN1/EPHA2	7
BP	GO:0010463	mesenchymal cell proliferation	5/485	44/18870	0.0052262	0.0300747	MYC/BMP4/OSR1/KDR/BMP2	5
BP	GO:0046006	regulation of activated T cell proliferation	5/485	44/18870	0.0052262	0.0300747	IL18/MIR21/CD274/FADD/PYCARD	5
BP	GO:2000516	positive regulation of CD4-positive, alpha-beta T cell activation	5/485	44/18870	0.0052262	0.0300747	IL18/MIR21/NFKBIZ/CD83/IL4R	5
BP	GO:0050866	negative regulation of cell activation	13/485	223/18870	0.00523003	0.0300747	MIR21/TNFAIP3/IRF1/THBD/CD274/LDLR/BMP4/IL4R/UBASH3B/PLA2G2A/INHBA/PELI1/SDC4	13
MF	GO:0005161	platelet-derived growth factor receptor binding	3/489	14/18496	0.00537932	0.0798135	ITGA5/PDGFC/VEGFA	3
BP	GO:0061326	renal tubule development	8/485	104/18870	0.00538139	0.0304262	MYC/LIF/AQP1/BMP4/OSR1/WNT2B/VEGFA/BMP2	8
BP	GO:0090100	positive regulation of transmembrane receptor protein serine/threonine kinase signaling pathway	8/485	104/18870	0.00538139	0.0304262	MIR21/THBS1/SULF1/BMP4/KDR/INHBA/LRG1/BMP2	8
BP	GO:1990830	cellular response to leukemia inhibitory factor	8/485	104/18870	0.00538139	0.0304262	SOCS3/SOX17/ICAM1/KLF4/PIGA/MAT2A/GCLM/MSC	8
BP	GO:0002218	activation of innate immune response	15/485	276/18870	0.00538231	0.0304262	FOSL1/TNFAIP3/IRF1/FBXL2/NFKBIZ/RNF135/BIRC3/OAS1/NLRC3/MIR17/PELI1/TRIL/TLR5/PYCARD/COLEC12	15
BP	GO:0021700	developmental maturation	17/485	330/18870	0.00538684	0.0304262	CDKN1A/RND1/NR4A2/BNC1/C3/KCNB1/EPB42/CX3CR1/KDR/CDH3/SYBU/B4GALT5/EREG/VEGFA/CEBPA/BMP2/RAB38	17
BP	GO:0042742	defense response to bacterium	17/485	330/18870	0.00538684	0.0304262	IL6/IL18/HP/SLPI/BCL3/SERPINE1/AQP1/NFKBIZ/IL1B/EPHA2/PLA2G2A/OAS1/CCL20/ANXA3/PYCARD/C5AR1/COLEC12	17
BP	GO:0002764	immune response-regulating signaling pathway	23/485	500/18870	0.00540306	0.0304262	NR4A3/FOSL1/FOSL2/TNFAIP3/IRF1/BLNK/FBXL2/NFKBIZ/RNF135/BIRC3/BTN3A3/OAS1/NLRC3/BTN3A2/PDE4B/MIR17/PELI1/TRIL/TLR5/NFKB1/PYCARD/C5AR1/COLEC12	23
BP	GO:0003156	regulation of animal organ formation	4/485	28/18870	0.00540996	0.0304262	SULF1/BMP4/WNT2B/BMP2	4
BP	GO:0018149	peptide cross-linking	4/485	28/18870	0.00540996	0.0304262	TGM1/THBS1/EPB42/COL3A1	4
BP	GO:0030194	positive regulation of blood coagulation	4/485	28/18870	0.00540996	0.0304262	THBS1/THBD/SERPINE1/PLAU	4
BP	GO:0048245	eosinophil chemotaxis	4/485	28/18870	0.00540996	0.0304262	CCL2/CCL11/CCL8/CCL7	4
BP	GO:1900048	positive regulation of hemostasis	4/485	28/18870	0.00540996	0.0304262	THBS1/THBD/SERPINE1/PLAU	4
BP	GO:1903019	negative regulation of glycoprotein metabolic process	4/485	28/18870	0.00540996	0.0304262	HBEGF/PTX3/AGO2/MIR17	4
BP	GO:0072073	kidney epithelium development	10/485	150/18870	0.00547037	0.0306774	MYC/LIF/AQP1/BMP4/OSR1/ASXL1/WNT2B/SDC4/VEGFA/BMP2	10
BP	GO:0001570	vasculogenesis	7/485	83/18870	0.00548827	0.0306774	JUNB/SOX17/HAS2/TIPARP/EPHA2/KDR/VEGFA	7
BP	GO:0048732	gland development	21/485	443/18870	0.00550811	0.0306774	IL6/SLC7A5/AREG/TNFAIP3/CRIP1/SOCS2/SULF1/BMP4/CLDN1/PCK2/EPHA2/ATP7B/CYP1B1/ASXL1/FADD/VEGFA/NFKB1/CSF1R/PCK1/CEBPA/BMP2	21
BP	GO:0032623	interleukin-2 production	6/485	63/18870	0.00550991	0.0306774	ZFP36/PNP/TNFAIP3/CD83/IL1B/PDE4B	6
BP	GO:0032663	regulation of interleukin-2 production	6/485	63/18870	0.00550991	0.0306774	ZFP36/PNP/TNFAIP3/CD83/IL1B/PDE4B	6
BP	GO:0032757	positive regulation of interleukin-8 production	6/485	63/18870	0.00550991	0.0306774	IL6/SERPINE1/IL1B/FADD/TLR5/PYCARD	6
BP	GO:0031214	biomineral tissue development	11/485	175/18870	0.00568537	0.0316015	FOSL2/PTGS2/ALOX15/SGMS2/SLC24A3/KLF10/BMP4/SLC20A1/OSR1/COL1A2/BMP2	11
MF	GO:0030295	protein kinase activator activity	9/489	124/18496	0.00569606	0.0825476	CDKN1A/GPRC5A/HBEGF/AREG/CKS2/ETAA1/EREG/VEGFA/BMP2	9
BP	GO:0042102	positive regulation of T cell proliferation	8/485	105/18870	0.00569805	0.0316192	IL6/PNP/IL18/MIR21/CD274/IL1B/FADD/PYCARD	8
BP	GO:0030890	positive regulation of B cell proliferation	5/485	45/18870	0.00575787	0.0317922	CDKN1A/GPR183/PELI1/CLCF1/IL7	5
BP	GO:0045687	positive regulation of glial cell differentiation	5/485	45/18870	0.00575787	0.0317922	MYRF/LIF/EGR2/CLCF1/BMP2	5
BP	GO:0051150	regulation of smooth muscle cell differentiation	5/485	45/18870	0.00575787	0.0317922	MIR21/MIR22/PRDM6/BMP4/EREG	5
BP	GO:0098773	skin epidermis development	9/485	128/18870	0.00584589	0.0322247	IL18/GRHL1/KLF4/NFKBIZ/CLDN1/UGCG/INHBA/FST/CDH3	9
BP	GO:0098742	cell-cell adhesion via plasma-membrane adhesion molecules	15/485	279/18870	0.00593149	0.0326426	SELE/CLDN15/FLRT3/ICAM1/IL1RN/PTPRF/KLF4/ITGA5/DSC3/PCDHA1/CLDN1/CDH3/EMB/IL1RAP/BMP2	15
BP	GO:0031100	animal organ regeneration	6/485	64/18870	0.00595118	0.0326969	CDKN1A/IL6/NR4A3/SLC7A5/CLDN1/ANXA3	6
BP	GO:0002532	production of molecular mediator involved in inflammatory response	8/485	106/18870	0.0060287	0.0328002	IL6/MIR21/SERPINE1/VAMP8/IL4R/NLRC3/MIR17/PYCARD	8
BP	GO:0006641	triglyceride metabolic process	8/485	106/18870	0.0060287	0.0328002	SIK1/AADAC/C3/LDLR/PCK2/INSIG1/SLC22A4/PCK1	8
BP	GO:0032760	positive regulation of tumor necrosis factor production	8/485	106/18870	0.0060287	0.0328002	IL6/ARID5A/THBS1/TNFRSF8/FADD/OAS1/PYCARD/AKAP12	8
BP	GO:0046425	regulation of receptor signaling pathway via JAK-STAT	8/485	106/18870	0.0060287	0.0328002	SOCS3/IL6/LIF/MST1/BCL3/SOCS2/GADD45A/CYP1B1	8
BP	GO:0051607	defense response to virus	17/485	334/18870	0.00605567	0.0328002	IL6/TNFAIP3/IRF1/FBXL2/RNF135/IL1B/RTP4/VAMP8/FADD/DDX21/TRIM6/IFIT1/OAS1/ISG20/NLRC3/MLKL/PYCARD	17
BP	GO:0046486	glycerolipid metabolic process	19/485	390/18870	0.00608921	0.0328002	SOCS3/SIK1/ITPKC/AADAC/C3/ALOX15/CISH/PIGV/LDLR/SOCS2/PIGA/DGKD/PCK2/PGAP1/PLA2G2A/INSIG1/SLC22A4/PCK1/RAB38	19
BP	GO:0010763	positive regulation of fibroblast migration	3/485	15/18870	0.00609805	0.0328002	THBS1/AQP1/AKAP12	3
BP	GO:0030728	ovulation	3/485	15/18870	0.00609805	0.0328002	ADAMTS1/INHBA/EREG	3
BP	GO:0032688	negative regulation of interferon-beta production	3/485	15/18870	0.00609805	0.0328002	REL/NLRC3/PYCARD	3
BP	GO:0035358	regulation of peroxisome proliferator activated receptor signaling pathway	3/485	15/18870	0.00609805	0.0328002	ALOX15/ASXL1/BMP2	3
BP	GO:0060211	regulation of nuclear-transcribed mRNA poly(A) tail shortening	3/485	15/18870	0.00609805	0.0328002	ZFP36/BTG2/AGO2	3
BP	GO:0070207	protein homotrimerization	3/485	15/18870	0.00609805	0.0328002	ITLN1/MLKL/STEAP4	3
BP	GO:1901722	regulation of cell proliferation involved in kidney development	3/485	15/18870	0.00609805	0.0328002	MYC/EGR1/BMP4	3
BP	GO:0051354	negative regulation of oxidoreductase activity	4/485	29/18870	0.00615023	0.0330275	MIR21/HP/GLA/NFKB1	4
BP	GO:0140546	defense response to symbiont	17/485	335/18870	0.00623301	0.0334181	IL6/TNFAIP3/IRF1/FBXL2/RNF135/IL1B/RTP4/VAMP8/FADD/DDX21/TRIM6/IFIT1/OAS1/ISG20/NLRC3/MLKL/PYCARD	17
BP	GO:0097305	response to alcohol	14/485	254/18870	0.00624309	0.0334183	CDKN1A/FOSB/SPIDR/FOSL1/RGS2/FOS/CSF3/SGK1/CLDN1/CYP1B1/GNAI1/FBP1/INHBA/PCK1	14
BP	GO:0031668	cellular response to extracellular stimulus	15/485	281/18870	0.00632209	0.0337025	CDKN1A/ATF3/SLC7A5/NR4A2/FOSL1/FOS/PIM1/KCNB1/KLF10/MN1/FAM107A/UPP1/WNT2B/PCK1/PDK4	15
BP	GO:0032768	regulation of monooxygenase activity	5/485	46/18870	0.00632654	0.0337025	GCH1/IL1B/CDH3/GLA/NFKB1	5
BP	GO:1900271	regulation of long-term synaptic potentiation	5/485	46/18870	0.00632654	0.0337025	NSG1/CALB2/ARC/CX3CR1/FAM107A	5
MF	GO:0005546	phosphatidylinositol-4,5-bisphosphate binding	7/489	83/18496	0.00637576	0.0902979	ANXA8/ALOX15/LDLRAP1/FZD7/ADAP2/CAPG/ANXA9	7
BP	GO:0043903	regulation of biological process involved in symbiotic interaction	6/485	65/18870	0.00641765	0.0340245	CH25H/PTX3/CXCL8/LY6E/TRIM6/TRIM68	6
BP	GO:1905330	regulation of morphogenesis of an epithelium	6/485	65/18870	0.00641765	0.0340245	LIF/MIR21/SULF1/BMP4/WNT2B/VEGFA	6
BP	GO:2000117	negative regulation of cysteine-type endopeptidase activity	6/485	65/18870	0.00641765	0.0340245	THBS1/AQP1/KLF4/PLAUR/MIR17/VEGFA	6
CC	GO:0031093	platelet alpha granule lumen	6/497	67/19886	0.00651559	0.150555	THBS1/SERPINE1/F5/SERPING1/VEGFA/SERPINA3	6
BP	GO:0033273	response to vitamin	7/485	86/18870	0.00665365	0.0351637	BCHE/PIM1/PTGS2/STC1/NFKBIZ/MN1/F5	7
BP	GO:2000134	negative regulation of G1/S transition of mitotic cell cycle	7/485	86/18870	0.00665365	0.0351637	CDKN1A/CCL2/KLF4/DCUN1D3/INHBA/FAM107A/DACT1	7
MF	GO:1901681	sulfur compound binding	15/489	275/18496	0.0066892	0.0921458	HBEGF/PTPRF/THBS1/ADAMTS1/CXCL8/CRISPLD2/NELL2/BMP4/RSPO1/CCDC80/CCL8/FST/CCL7/VEGFA/ADAMTS8	15
BP	GO:0051047	positive regulation of secretion	16/485	310/18870	0.00670166	0.0352259	RAB27B/RAB15/AQP1/SYT4/KCNB1/GOLPH3L/IL1B/PCK2/VAMP8/IL4R/RAB27A/RBP4/INHBA/SYBU/SDC4/BMP2	16
BP	GO:0006469	negative regulation of protein kinase activity	11/485	179/18870	0.00670773	0.0352259	CDKN1A/GPRC5A/RGS2/GADD45A/ERRFI1/IL1B/DUSP1/UBASH3B/PYCARD/CEBPA/BMP2	11
BP	GO:0071772	response to BMP	11/485	179/18870	0.00670773	0.0352259	EGR1/LRP2/MIR21/TNFAIP6/HTRA1/SULF1/BMP4/KDR/FST/FSTL3/BMP2	11
BP	GO:0071773	cellular response to BMP stimulus	11/485	179/18870	0.00670773	0.0352259	EGR1/LRP2/MIR21/TNFAIP6/HTRA1/SULF1/BMP4/KDR/FST/FSTL3/BMP2	11
BP	GO:0019079	viral genome replication	9/485	131/18870	0.006781	0.0355546	CCL2/SLPI/CXCL8/FBXL2/TRIM6/IFIT1/OAS1/CCL8/ISG20	9
MF	GO:0038024	cargo receptor activity	6/489	64/18496	0.00680198	0.0921458	LRP2/PRG4/LDLR/MARCO/ACKR4/COLEC12	6
BP	GO:0007584	response to nutrient	10/485	155/18870	0.00685478	0.0358849	BCHE/PIM1/PTGS2/STC1/NFKBIZ/C2/CYP1B1/MN1/F5/GCLM	10
CC	GO:0030139	endocytic vesicle	17/497	348/19886	0.00689842	0.150555	LRP2/HBEGF/DPP4/AREG/HP/CSF3/SPHK1/RAB17/LDLR/LDLRAP1/VAMP8/ANXA3/EREG/MARCO/CEMIP/RAB38/COLEC12	17
BP	GO:0045601	regulation of endothelial cell differentiation	5/485	47/18870	0.00693348	0.0360684	MIR21/APOLD1/BMP4/IL1B/VEGFA	5
BP	GO:0045933	positive regulation of muscle contraction	5/485	47/18870	0.00693348	0.0360684	RGS2/MIR21/PTGS2/SPHK1/NMU	5
BP	GO:0050798	activated T cell proliferation	5/485	47/18870	0.00693348	0.0360684	IL18/MIR21/CD274/FADD/PYCARD	5
BP	GO:0043032	positive regulation of macrophage activation	4/485	30/18870	0.00695483	0.0360684	THBS1/IL1RL1/IL4R/CEBPA	4
BP	GO:0045987	positive regulation of smooth muscle contraction	4/485	30/18870	0.00695483	0.0360684	MIR21/PTGS2/SPHK1/NMU	4
BP	GO:0050820	positive regulation of coagulation	4/485	30/18870	0.00695483	0.0360684	THBS1/THBD/SERPINE1/PLAU	4
MF	GO:0030414	peptidase inhibitor activity	11/489	175/18496	0.00696751	0.09238	SLPI/C3/THBS1/SERPINE1/TFPI2/RARRES1/SERPINB1/SERPING1/C4A/SERPINB2/SERPINA3	11
BP	GO:0048708	astrocyte differentiation	7/485	87/18870	0.00708019	0.0366045	IL6/LIF/LDLR/IL1B/CLCF1/C5AR1/BMP2	7
BP	GO:0051851	modulation by host of symbiont process	7/485	87/18870	0.00708019	0.0366045	PTX3/CHD1/JUN/FBXL2/CX3CR1/CCL8/CSF1R	7
BP	GO:0006939	smooth muscle contraction	8/485	109/18870	0.00710849	0.0366804	RGS2/MIR21/PTGS2/SPHK1/CALCA/SULF1/NMU/CNN1	8
BP	GO:0042476	odontogenesis	9/485	132/18870	0.00711689	0.0366804	SERPINE1/AQP1/RELT/BMP4/OSR1/INHBA/FST/COL1A2/BMP2	9
BP	GO:0061448	connective tissue development	15/485	285/18870	0.00716533	0.036816	ARID5A/EGR1/SLC25A25/GPR4/MIR21/FOSL2/STC1/CRIP1/SULF1/BMP4/OSR1/CHSY1/WNT2B/COL3A1/BMP2	15
BP	GO:0071900	regulation of protein serine/threonine kinase activity	15/485	285/18870	0.00716533	0.036816	CDKN1A/SERTAD1/RGS2/MST1/THBS1/GADD45A/IL1B/DUSP1/ETAA1/PDGFC/VEGFA/CEMIP/PYCARD/CEBPA/BMP2	15
BP	GO:0002449	lymphocyte mediated immunity	18/485	368/18870	0.00718401	0.0368482	IL6/ARID5A/IL18/ICAM1/C3/BCL3/NFKBIZ/C2/BTN3A3/IL1B/FADD/IL4R/CFI/RAB27A/BTN3A2/CLCF1/SERPING1/C4A	18
BP	GO:0045088	regulation of innate immune response	20/485	425/18870	0.00719373	0.0368482	FOSL1/MIR21/TNFAIP3/IRF1/FBXL2/NFKBIZ/RNF135/BIRC3/FADD/TRIM6/OAS1/NLRC3/MIR17/EREG/PELI1/SERPING1/TRIL/TLR5/PYCARD/COLEC12	20
BP	GO:0032354	response to follicle-stimulating hormone	3/485	16/18870	0.00736372	0.0375457	CYP1B1/INHBA/GCLM	3
BP	GO:0090336	positive regulation of brown fat cell differentiation	3/485	16/18870	0.00736372	0.0375457	PIM1/PTGS2/METRNL	3
BP	GO:2000318	positive regulation of T-helper 17 type immune response	3/485	16/18870	0.00736372	0.0375457	ARID5A/MIR21/NFKBIZ	3
BP	GO:0045165	cell fate commitment	15/485	286/18870	0.00738961	0.0376201	SOCS3/IL6/SOX17/KLF4/MCL1/ETS2/KDM6B/BMP4/FZD7/KDR/TEAD4/WNT2B/IL7/IFRD1/BMP2	15
BP	GO:0070301	cellular response to hydrogen peroxide	6/485	67/18870	0.00742939	0.0377073	IL6/TNFAIP3/AQP1/SPHK1/KDM6B/CYP1B1	6
BP	GO:0072577	endothelial cell apoptotic process	6/485	67/18870	0.00742939	0.0377073	CCL2/ICAM1/TNFAIP3/THBS1/SERPINE1/KDR	6
BP	GO:0048593	camera-type eye morphogenesis	9/485	133/18870	0.00746538	0.0378299	AQP1/BCAR3/FJX1/BMP4/EPHA2/KDR/RBP4/WNT2B/VEGFA	9
BP	GO:0002444	myeloid leukocyte mediated immunity	8/485	110/18870	0.007499	0.0378299	IL6/NR4A3/C3/VAMP8/CX3CR1/DDX21/IL4R/ANXA3	8
BP	GO:0008637	apoptotic mitochondrial changes	8/485	110/18870	0.007499	0.0378299	IER3/MCL1/PLAUR/BOK/MIR17/BCL2A1/PYCARD/GCLM	8
BP	GO:1903557	positive regulation of tumor necrosis factor superfamily cytokine production	8/485	110/18870	0.007499	0.0378299	IL6/ARID5A/THBS1/TNFRSF8/FADD/OAS1/PYCARD/AKAP12	8
BP	GO:0006953	acute-phase response	5/485	48/18870	0.00757996	0.0380079	IL6/HP/PTGS2/IL1B/SERPINA3	5
BP	GO:0032620	interleukin-17 production	5/485	48/18870	0.00757996	0.0380079	IL6/ARID5A/SLC7A5/IL18/SPHK1	5
BP	GO:0032660	regulation of interleukin-17 production	5/485	48/18870	0.00757996	0.0380079	IL6/ARID5A/SLC7A5/IL18/SPHK1	5
BP	GO:0042551	neuron maturation	5/485	48/18870	0.00757996	0.0380079	RND1/NR4A2/C3/KCNB1/B4GALT5	5
BP	GO:0009314	response to radiation	20/485	428/18870	0.00774501	0.0387772	CDKN1A/SIK1/MYC/EGR1/SPIDR/MIR21/FOS/LRRN4/BCL3/THBD/AQP1/RBM4B/BHLHE40/CRIP1/DDB2/GADD45A/DCUN1D3/CCL11/NABP1/COL3A1	20
BP	GO:0006639	acylglycerol metabolic process	9/485	134/18870	0.00782674	0.0391275	SIK1/AADAC/C3/LDLR/DGKD/PCK2/INSIG1/SLC22A4/PCK1	9
BP	GO:1903532	positive regulation of secretion by cell	15/485	288/18870	0.00785502	0.039161	RAB27B/RAB15/SYT4/KCNB1/GOLPH3L/IL1B/PCK2/VAMP8/IL4R/RAB27A/RBP4/INHBA/SYBU/SDC4/BMP2	15
BP	GO:0001659	temperature homeostasis	11/485	183/18870	0.00786873	0.039161	EGR1/IL18/PTGS2/GADD45G/KDM6B/IL1B/NMU/IL4R/GPR3/PDGFC/VEGFA	11
BP	GO:0060759	regulation of response to cytokine stimulus	11/485	183/18870	0.00786873	0.039161	IL6/MIR21/TNFAIP3/IL1RN/KLF4/SPHK1/FADD/TRIM6/OAS1/PYCARD/IL7	11
BP	GO:0032611	interleukin-1 beta production	8/485	111/18870	0.00790543	0.0392264	IL6/EGR1/TNFAIP3/SPHK1/CX3CR1/PANX1/SERPINB1/PYCARD	8
BP	GO:0032651	regulation of interleukin-1 beta production	8/485	111/18870	0.00790543	0.0392264	IL6/EGR1/TNFAIP3/SPHK1/CX3CR1/PANX1/SERPINB1/PYCARD	8
MF	GO:0046935	1-phosphatidylinositol-3-kinase regulator activity	3/489	16/18496	0.00795775	0.103311	SOCS3/CISH/SOCS2	3
BP	GO:0072171	mesonephric tubule morphogenesis	6/485	68/18870	0.00797624	0.0395189	MYC/BMP4/OSR1/WNT2B/VEGFA/BMP2	6
BP	GO:0045861	negative regulation of proteolysis	13/485	235/18870	0.00800277	0.0395914	ANXA8/THBS1/SERPINE1/AQP1/KLF4/PLAUR/SERPINB1/PLAU/MIR17/SERPING1/VEGFA/SERPINB2/SERPINA3	13
BP	GO:0006643	membrane lipid metabolic process	12/485	209/18870	0.00802309	0.039633	ST3GAL5/CREM/B3GNT5/SPHK1/SGMS2/PIGV/PIGA/CYP1B1/UGCG/PGAP1/B4GALT5/GLA	12
BP	GO:0006066	alcohol metabolic process	18/485	373/18870	0.00820114	0.0403935	CH25H/LRP2/ITPKC/HSD17B6/SPHK1/LDLR/GCH1/PCK2/CYP1B1/LDLRAP1/RBP4/INSIG1/RDH10/ADH1C/NFKB1/PCK1/CEBPA/BMP2	18
BP	GO:0006638	neutral lipid metabolic process	9/485	135/18870	0.00820129	0.0403935	SIK1/AADAC/C3/LDLR/DGKD/PCK2/INSIG1/SLC22A4/PCK1	9
BP	GO:0050890	cognition	16/485	317/18870	0.00822012	0.0404192	BTG2/FOSL1/BCHE/FOS/EGR2/LRRN4/PTGS2/SYT4/ITGA5/SGK1/ARC/LDLR/CX3CR1/CCL11/FAM107A/C5AR1	16
BP	GO:0001774	microglial cell activation	5/485	49/18870	0.00826723	0.0404192	IL6/SPHK1/LDLR/CX3CR1/C5AR1	5
BP	GO:0002673	regulation of acute inflammatory response	5/485	49/18870	0.00826723	0.0404192	IL6/C3/PTGS2/IL1B/OSMR	5
BP	GO:0014911	positive regulation of smooth muscle cell migration	5/485	49/18870	0.00826723	0.0404192	NR4A3/HAS2/MIR21/ADAMTS1/CYP1B1	5
BP	GO:0046596	regulation of viral entry into host cell	5/485	49/18870	0.00826723	0.0404192	CH25H/PTX3/LY6E/TRIM6/TRIM68	5
BP	GO:0045833	negative regulation of lipid metabolic process	8/485	112/18870	0.00832819	0.0406576	SIK1/CH25H/SPHK1/IL1B/INSIG1/NFKB1/FMO1/BMP2	8
BP	GO:0051962	positive regulation of nervous system development	15/485	290/18870	0.00834351	0.0406728	IL6/MYRF/SLC7A5/LRP2/CBLN2/LIF/FLRT3/EGR2/FLRT2/IL1B/CX3CR1/CLCF1/VEGFA/IL1RAP/BMP2	15
MF	GO:0019207	kinase regulator activity	14/489	256/18496	0.0084397	0.107332	CDKN1A/SOCS3/GPRC5A/HBEGF/ITPRIP/AREG/CCNL1/CISH/SOCS2/CKS2/ETAA1/EREG/VEGFA/BMP2	14
BP	GO:0006094	gluconeogenesis	7/485	90/18870	0.00848157	0.0412853	SIK1/ATF3/MST1/PCK2/RBP4/FBP1/PCK1	7
BP	GO:0007498	mesoderm development	9/485	136/18870	0.00858932	0.0417488	KLF4/ETS2/KDM6B/BMP4/EPHA2/OSR1/MEST/INHBA/VEGFA	9
BP	GO:0003007	heart morphogenesis	14/485	264/18870	0.008641	0.0419388	LRP2/SOX17/HAS2/MIR21/PIM1/ADAMTS1/FLRT2/BMP4/ASXL1/RBP4/MIR17/VEGFA/ARL13B/BMP2	14
BP	GO:0072677	eosinophil migration	4/485	32/18870	0.00876591	0.0421504	CCL2/CCL11/CCL8/CCL7	4
BP	GO:2000316	regulation of T-helper 17 type immune response	4/485	32/18870	0.00876591	0.0421504	ARID5A/JUNB/MIR21/NFKBIZ	4
BP	GO:0003128	heart field specification	3/485	17/18870	0.00877322	0.0421504	LRP2/BMP4/BMP2	3
BP	GO:0043129	surfactant homeostasis	3/485	17/18870	0.00877322	0.0421504	KDR/OAS1/VEGFA	3
BP	GO:0072109	glomerular mesangium development	3/485	17/18870	0.00877322	0.0421504	EGR1/GPR4/BMP4	3
BP	GO:0072224	metanephric glomerulus development	3/485	17/18870	0.00877322	0.0421504	EGR1/AQP1/OSR1	3
BP	GO:0090399	replicative senescence	3/485	17/18870	0.00877322	0.0421504	CDKN1A/MIR21/SERPINE1	3
MF	GO:0019209	kinase activator activity	9/489	133/18496	0.00888811	0.110774	CDKN1A/GPRC5A/HBEGF/AREG/CKS2/ETAA1/EREG/VEGFA/BMP2	9
BP	GO:0033555	multicellular organismal response to stress	7/485	91/18870	0.00899108	0.0430368	NR4A2/TAC1/LPAR5/DPP4/THBS1/CALCA/GCH1	7
BP	GO:0022602	ovulation cycle process	5/485	50/18870	0.0089965	0.0430368	PTX3/TNFAIP6/ADAMTS1/INHBA/EREG	5
BP	GO:0071320	cellular response to cAMP	5/485	50/18870	0.0089965	0.0430368	STC1/AQP1/CYP1B1/FBP1/PCK1	5
BP	GO:0048662	negative regulation of smooth muscle cell proliferation	6/485	70/18870	0.0091558	0.0436734	CDKN1A/TNFAIP3/BMP4/HMOX1/CNN1/BMP2	6
BP	GO:0051148	negative regulation of muscle cell differentiation	6/485	70/18870	0.0091558	0.0436734	RGS2/MIR21/PRDM6/FZD7/EREG/BMP2	6
BP	GO:0061138	morphogenesis of a branching epithelium	11/485	187/18870	0.00918034	0.0437278	SOCS3/MYC/AREG/SULF1/BMP4/EPHA2/KDR/RDH10/WNT2B/VEGFA/BMP2	11
BP	GO:0120254	olefinic compound metabolic process	10/485	162/18870	0.00923173	0.0439097	EGR1/HSD17B6/PTGS2/ALOX15/PTGS1/CYP1B1/RBP4/RDH10/ADH1C/BMP2	10
BP	GO:0045637	regulation of myeloid cell differentiation	12/485	213/18870	0.00925419	0.0439538	ZFP36/MYC/LIF/FOS/TNFAIP6/CSF3/KLF10/FADD/UBASH3B/INHBA/FSTL3/ETS1	12
BP	GO:0010212	response to ionizing radiation	9/485	138/18870	0.009407	0.0446159	CDKN1A/MYC/EGR1/SPIDR/MIR21/THBD/GADD45A/DCUN1D3/NABP1	9
MF	GO:0030169	low-density lipoprotein particle binding	3/489	17/18496	0.00947583	0.113532	THBS1/LDLR/COLEC12	3
MF	GO:0055102	lipase inhibitor activity	3/489	17/18496	0.00947583	0.113532	ANXA4/ANXA9/ANXA3	3
BP	GO:1903510	mucopolysaccharide metabolic process	7/485	92/18870	0.00952266	0.0451002	HAS2/TNFAIP6/IL1B/CHSY1/HAS1/CEMIP/NFKB1	7
MF	GO:0030515	snoRNA binding	4/489	32/18496	0.00965601	0.113532	NUDT5/DDX21/ISG20/BYSL	4
BP	GO:0010332	response to gamma radiation	5/485	51/18870	0.00976897	0.0460407	CDKN1A/MYC/EGR1/MIR21/DCUN1D3	5
BP	GO:0046460	neutral lipid biosynthetic process	5/485	51/18870	0.00976897	0.0460407	SIK1/C3/LDLR/PCK2/PCK1	5
BP	GO:0046463	acylglycerol biosynthetic process	5/485	51/18870	0.00976897	0.0460407	SIK1/C3/LDLR/PCK2/PCK1	5
BP	GO:1905207	regulation of cardiocyte differentiation	4/485	33/18870	0.00977656	0.0460407	SOX17/BMP4/FZD7/BMP2	4
MF	GO:0061135	endopeptidase regulator activity	11/489	184/18496	0.00997064	0.114258	SLPI/C3/THBS1/SERPINE1/TFPI2/RARRES1/SERPINB1/SERPING1/C4A/SERPINB2/SERPINA3	11
BP	GO:0019319	hexose biosynthetic process	7/485	93/18870	0.0100769	0.0473879	SIK1/ATF3/MST1/PCK2/RBP4/FBP1/PCK1	7
MF	GO:0048020	CCR chemokine receptor binding	5/489	50/18496	0.0100844	0.114258	CCL2/CCL11/CCL8/CCL7/CCL20	5
BP	GO:0007178	transmembrane receptor protein serine/threonine kinase signaling pathway	19/485	410/18870	0.0101019	0.0474384	EGR1/LRP2/MIR21/FOS/THBS1/TNFAIP6/JUN/HTRA1/SULF1/BMP4/KDR/INHBA/FST/MIR17/FSTL3/COL1A2/COL3A1/LRG1/BMP2	19
BP	GO:0010633	negative regulation of epithelial cell migration	8/485	116/18870	0.0101903	0.0474384	MIR21/ADAMTS9/THBS1/STC1/KLF4/MIR22/GADD45A/MEOX2	8
BP	GO:0002827	positive regulation of T-helper 1 type immune response	3/485	18/18870	0.0103298	0.0474384	ARID5A/IL18/IL1B	3
BP	GO:0002830	positive regulation of type 2 immune response	3/485	18/18870	0.0103298	0.0474384	IL6/IL18/IL4R	3
BP	GO:0006825	copper ion transport	3/485	18/18870	0.0103298	0.0474384	ATP7B/SLC39A11/STEAP4	3
BP	GO:0020027	hemoglobin metabolic process	3/485	18/18870	0.0103298	0.0474384	KLF4/EPB42/INHBA	3
BP	GO:0036499	PERK-mediated unfolded protein response	3/485	18/18870	0.0103298	0.0474384	PPP1R15A/PPP1R15B/BOK	3
BP	GO:0038128	ERBB2 signaling pathway	3/485	18/18870	0.0103298	0.0474384	HBEGF/AREG/EREG	3
BP	GO:0048569	post-embryonic animal organ development	3/485	18/18870	0.0103298	0.0474384	KLF4/KDR/VEGFA	3
BP	GO:0071371	cellular response to gonadotropin stimulus	3/485	18/18870	0.0103298	0.0474384	CYP1B1/INHBA/GCLM	3
BP	GO:0072189	ureter development	3/485	18/18870	0.0103298	0.0474384	SOX17/BMP4/OSR1	3
BP	GO:0090036	regulation of protein kinase C signaling	3/485	18/18870	0.0103298	0.0474384	DGKD/VEGFA/AKAP12	3
BP	GO:0150078	positive regulation of neuroinflammatory response	3/485	18/18870	0.0103298	0.0474384	IL6/IL18/IL1B	3
BP	GO:1904044	response to aldosterone	3/485	18/18870	0.0103298	0.0474384	CDKN1A/SGK1/INHBA	3
BP	GO:1905288	vascular associated smooth muscle cell apoptotic process	3/485	18/18870	0.0103298	0.0474384	SLC7A5/MIR21/MIR17	3
BP	GO:1905459	regulation of vascular associated smooth muscle cell apoptotic process	3/485	18/18870	0.0103298	0.0474384	SLC7A5/MIR21/MIR17	3
BP	GO:2000811	negative regulation of anoikis	3/485	18/18870	0.0103298	0.0474384	ITGA5/MCL1/PDK4	3
BP	GO:0035051	cardiocyte differentiation	10/485	165/18870	0.0104246	0.0478079	SIK1/SOX17/RGS2/MIR21/KDM6B/BMP4/FZD7/INHBA/VEGFA/BMP2	10
MF	GO:0030276	clathrin binding	6/489	70/18496	0.0104273	0.115641	NSG1/SYT4/LDLR/SYT17/LDLRAP1/CEMIP	6
BP	GO:0006024	glycosaminoglycan biosynthetic process	6/485	72/18870	0.010455	0.0478154	HAS2/IL1B/CHSY1/HAS1/CEMIP/NFKB1	6
BP	GO:0046635	positive regulation of alpha-beta T cell activation	6/485	72/18870	0.010455	0.0478154	PNP/IL18/MIR21/NFKBIZ/CD83/IL4R	6
BP	GO:0002269	leukocyte activation involved in inflammatory response	5/485	52/18870	0.0105858	0.048215	IL6/SPHK1/LDLR/CX3CR1/C5AR1	5
BP	GO:0042572	retinol metabolic process	5/485	52/18870	0.0105858	0.048215	HSD17B6/CYP1B1/RBP4/RDH10/ADH1C	5
BP	GO:0071470	cellular response to osmotic stress	5/485	52/18870	0.0105858	0.048215	PTGS2/AQP1/FBP1/PYCARD/PCK1	5
MF	GO:0019956	chemokine binding	4/489	33/18496	0.0107632	0.115641	ZFP36/CX3CR1/ACKR1/ACKR4	4
MF	GO:0030296	protein tyrosine kinase activator activity	4/489	33/18496	0.0107632	0.115641	HBEGF/AREG/EREG/VEGFA	4
BP	GO:0032743	positive regulation of interleukin-2 production	4/485	34/18870	0.0108599	0.0489942	PNP/CD83/IL1B/PDE4B	4
BP	GO:0034383	low-density lipoprotein particle clearance	4/485	34/18870	0.0108599	0.0489942	LDLR/LDLRAP1/HMOX1/MIR17	4
BP	GO:0034405	response to fluid shear stress	4/485	34/18870	0.0108599	0.0489942	HAS2/PTGS2/KLF4/TFPI2	4
BP	GO:0043276	anoikis	4/485	34/18870	0.0108599	0.0489942	SIK1/ITGA5/MCL1/PDK4	4
BP	GO:0045939	negative regulation of steroid metabolic process	4/485	34/18870	0.0108599	0.0489942	CH25H/INSIG1/NFKB1/BMP2	4
BP	GO:0048333	mesodermal cell differentiation	4/485	34/18870	0.0108599	0.0489942	KLF4/KDM6B/BMP4/INHBA	4
BP	GO:0090022	regulation of neutrophil chemotaxis	4/485	34/18870	0.0108599	0.0489942	DPP4/TNFAIP6/CXCL8/C5AR1	4
BP	GO:0016485	protein processing	13/485	245/18870	0.0111039	0.0500081	MYRF/BCHE/DPP4/DISP1/THBS1/THBD/SERPINE1/CPXM1/SCG5/PLAUR/FADD/PLAU/CTSE	13
BP	GO:0051347	positive regulation of transferase activity	19/485	414/18870	0.0111147	0.0500081	CDKN1A/MYC/EGR1/IL18/MIR21/THBS1/KLF4/CALCA/IL1B/EPHA2/KDR/TNFRSF10B/ETAA1/ARRDC4/EREG/PDGFC/VEGFA/CEMIP/CSF1R	19
CC	GO:0005905	clathrin-coated pit	6/497	75/19886	0.0111368	0.227865	SELE/LRP2/SPHK1/LDLR/DGKD/CEMIP	6
MF	GO:0005003	ephrin receptor activity	3/489	18/18496	0.0111511	0.117778	EFNB3/EPHB6/EPHA2	3
BP	GO:0071677	positive regulation of mononuclear cell migration	6/485	73/18870	0.0111513	0.0500377	SERPINE1/CX3CR1/FADD/CCL7/CCL20/PYCARD	6
BP	GO:0072678	T cell migration	6/485	73/18870	0.0111513	0.0500377	CCL2/ICAM1/GPR183/FADD/CCL20/PYCARD	6
BP	GO:1902807	negative regulation of cell cycle G1/S phase transition	7/485	95/18870	0.0112552	0.050436	CDKN1A/CCL2/KLF4/DCUN1D3/INHBA/FAM107A/DACT1	7
BP	GO:0002762	negative regulation of myeloid leukocyte differentiation	5/485	53/18870	0.0114481	0.051202	MYC/TNFAIP6/UBASH3B/INHBA/FSTL3	5
BP	GO:0033673	negative regulation of kinase activity	11/485	193/18870	0.0114569	0.051202	CDKN1A/GPRC5A/RGS2/GADD45A/ERRFI1/IL1B/DUSP1/UBASH3B/PYCARD/CEBPA/BMP2	11
BP	GO:0007389	pattern specification process	21/485	475/18870	0.0116485	0.0519886	BTG2/LRP2/SOX17/DISP1/EGR2/C3/STC1/HES4/HOXB2/BHLHE40/ARC/ETS2/BMP4/OSR1/CHSY1/MEOX2/PGAP1/FST/WNT2B/ARL13B/BMP2	21
BP	GO:0034341	response to type II interferon	9/485	143/18870	0.011708	0.0521441	CCL2/IRF1/CLDN1/GCH1/DAPK1/CCL11/CCL8/CCL7/CCL20	9
BP	GO:0007611	learning or memory	14/485	274/18870	0.0117147	0.0521441	BTG2/FOSL1/BCHE/FOS/EGR2/LRRN4/PTGS2/SYT4/ITGA5/SGK1/ARC/LDLR/CX3CR1/CCL11	14
BP	GO:0050731	positive regulation of peptidyl-tyrosine phosphorylation	10/485	168/18870	0.0117313	0.0521483	IL6/LIF/IL18/HBEGF/AREG/CSF3/ITGA5/CLCF1/VEGFA/CSF1R	10
BP	GO:0010810	regulation of cell-substrate adhesion	12/485	220/18870	0.0117571	0.0521934	HAS2/THBS1/SERPINE1/ALOX15/ITGA5/FZD7/KDR/CCDC80/FAM107A/PLAU/SDC4/VEGFA	12
BP	GO:1904892	regulation of receptor signaling pathway via STAT	8/485	119/18870	0.0117775	0.0522141	SOCS3/IL6/LIF/MST1/BCL3/SOCS2/GADD45A/CYP1B1	8
BP	GO:0022604	regulation of cell morphogenesis	13/485	247/18870	0.0118231	0.0522773	CCL2/MIR21/SYT4/ARC/EPB42/ARHGAP18/SYT17/KDR/CCL11/CCL7/VEGFA/CSF1R/PLEKHO1	13
BP	GO:0090257	regulation of muscle system process	13/485	247/18870	0.0118231	0.0522773	NR4A3/NR4A1/RGS2/MIR21/PTGS2/STC1/SPHK1/CALCA/LMCD1/NMU/PDE4B/MIR17/CNN1	13
BP	GO:0002224	toll-like receptor signaling pathway	6/485	74/18870	0.0118798	0.0523162	FOSL1/IRF1/NFKBIZ/BIRC3/MIR17/TLR5	6
BP	GO:0045669	positive regulation of osteoblast differentiation	6/485	74/18870	0.0118798	0.0523162	IL6/CEBPD/MIR21/BMP4/CEBPA/BMP2	6
CC	GO:1904724	tertiary granule lumen	5/497	55/19886	0.0119173	0.229491	PTX3/HP/CXCL1/TNFAIP6/LRG1	5
BP	GO:0001893	maternal placenta development	4/485	35/18870	0.0120177	0.0523162	JUNB/LIF/PTGS2/STC1	4
BP	GO:0030224	monocyte differentiation	4/485	35/18870	0.0120177	0.0523162	MYC/BMP4/VEGFA/CSF1R	4
BP	GO:0061081	positive regulation of myeloid leukocyte cytokine production involved in immune response	4/485	35/18870	0.0120177	0.0523162	NR4A3/DDX21/PANX1/PYCARD	4
BP	GO:0090050	positive regulation of cell migration involved in sprouting angiogenesis	4/485	35/18870	0.0120177	0.0523162	PTGS2/KDR/HMOX1/VEGFA	4
BP	GO:0001829	trophectodermal cell differentiation	3/485	19/18870	0.0120362	0.0523162	JUNB/TEAD4/BYSL	3
BP	GO:0002544	chronic inflammatory response	3/485	19/18870	0.0120362	0.0523162	TNFAIP3/THBS1/NFKBIZ	3
BP	GO:0010744	positive regulation of macrophage derived foam cell differentiation	3/485	19/18870	0.0120362	0.0523162	IL18/PLA2G2A/NFKB1	3
BP	GO:0010759	positive regulation of macrophage chemotaxis	3/485	19/18870	0.0120362	0.0523162	THBS1/CSF1R/C5AR1	3
BP	GO:0032695	negative regulation of interleukin-12 production	3/485	19/18870	0.0120362	0.0523162	MIR21/THBS1/NFKB1	3
BP	GO:0045064	T-helper 2 cell differentiation	3/485	19/18870	0.0120362	0.0523162	IL18/BCL3/IL4R	3
BP	GO:0060602	branch elongation of an epithelium	3/485	19/18870	0.0120362	0.0523162	AREG/BMP4/RDH10	3
BP	GO:0051250	negative regulation of lymphocyte activation	10/485	169/18870	0.0121933	0.0528729	MIR21/TNFAIP3/IRF1/CD274/BMP4/IL4R/PLA2G2A/INHBA/PELI1/SDC4	10
BP	GO:0051896	regulation of phosphatidylinositol 3-kinase/protein kinase B signal transduction	13/485	248/18870	0.012196	0.0528729	LRP2/IL18/HBEGF/MIR21/THBS1/FBXL2/CSF3/EPHA2/CX3CR1/KDR/NLRC3/PDGFC/CSF1R	13
MF	GO:0016757	glycosyltransferase activity	14/489	268/18496	0.0122771	0.127509	PNP/ST3GAL5/HAS2/NAMPT/B3GNT5/TIPARP/PIGV/GALNT12/PIGA/CHSY1/UGCG/HAS1/UPP1/B4GALT5	14
BP	GO:0071346	cellular response to type II interferon	8/485	120/18870	0.0123449	0.0533625	CCL2/IRF1/CLDN1/DAPK1/CCL11/CCL8/CCL7/CCL20	8
BP	GO:0010761	fibroblast migration	5/485	54/18870	0.0123571	0.0533625	THBS1/AQP1/HAS1/SDC4/AKAP12	5
BP	GO:0050805	negative regulation of synaptic transmission	5/485	54/18870	0.0123571	0.0533625	BCHE/PTGS2/KCNB1/ARC/IL1B	5
BP	GO:0050767	regulation of neurogenesis	18/485	390/18870	0.0125564	0.0541532	IL6/MYRF/BTG2/EFNB3/SLC7A5/LRP2/LIF/EGR2/SYT4/BHLHE40/LDLR/IL1B/CX3CR1/CCL11/CLCF1/VEGFA/IFRD1/BMP2	18
BP	GO:0035924	cellular response to vascular endothelial growth factor stimulus	6/485	75/18870	0.0126412	0.0544481	NR4A1/EGR3/MIR21/SPHK1/KDR/VEGFA	6
BP	GO:0006937	regulation of muscle contraction	10/485	170/18870	0.0126688	0.0544967	NR4A1/RGS2/MIR21/PTGS2/STC1/SPHK1/CALCA/NMU/PDE4B/CNN1	10
BP	GO:0045834	positive regulation of lipid metabolic process	9/485	145/18870	0.0127374	0.0546154	NR4A3/AADAC/PTGS2/LDLR/IL1B/LDLRAP1/RDH10/PCK1/RAB38	9
BP	GO:2001235	positive regulation of apoptotic signaling pathway	9/485	145/18870	0.0127374	0.0546154	MYC/ATF3/THBS1/TNFRSF12A/MCL1/FADD/INHBA/BOK/PYCARD	9
BP	GO:1901991	negative regulation of mitotic cell cycle phase transition	11/485	196/18870	0.0127456	0.0546154	CDKN1A/CCL2/IER3/KLF4/DUSP1/DCUN1D3/INHBA/FAM107A/RBBP8/DACT1/NABP1	11
BP	GO:0006022	aminoglycan metabolic process	8/485	121/18870	0.0129321	0.0552723	HAS2/TNFAIP6/IL1B/CHSY1/HAS1/B4GALT5/CEMIP/NFKB1	8
BP	GO:0030510	regulation of BMP signaling pathway	8/485	121/18870	0.0129321	0.0552723	LRP2/TNFAIP6/HTRA1/SULF1/BMP4/KDR/FST/FSTL3	8
CC	GO:0030666	endocytic vesicle membrane	11/497	202/19886	0.0129786	0.236043	LRP2/HBEGF/AREG/LDLR/LDLRAP1/VAMP8/ANXA3/EREG/MARCO/RAB38/COLEC12	11
BP	GO:0060562	epithelial tube morphogenesis	16/485	334/18870	0.0130645	0.0557665	MYC/LRP2/SOX17/MIR21/AREG/BMP4/EPHA2/OSR1/KDR/RDH10/WNT2B/SDC4/VEGFA/CSF1R/ARL13B/BMP2	16
BP	GO:0001959	regulation of cytokine-mediated signaling pathway	10/485	171/18870	0.0131582	0.0559561	IL6/MIR21/TNFAIP3/IL1RN/SPHK1/FADD/TRIM6/OAS1/PYCARD/IL7	10
BP	GO:0051897	positive regulation of phosphatidylinositol 3-kinase/protein kinase B signal transduction	10/485	171/18870	0.0131582	0.0559561	LRP2/IL18/HBEGF/MIR21/THBS1/CSF3/CX3CR1/KDR/PDGFC/CSF1R	10
BP	GO:0042113	B cell activation	14/485	278/18870	0.0131593	0.0559561	CDKN1A/IL6/FOSL2/TNFAIP3/GPR183/BLNK/BCL3/NFKBIZ/INHBA/KLF6/DOCK11/PELI1/CLCF1/IL7	14
BP	GO:0001657	ureteric bud development	7/485	98/18870	0.0132054	0.0559915	MYC/BMP4/OSR1/WNT2B/SDC4/VEGFA/BMP2	7
MF	GO:0005154	epidermal growth factor receptor binding	4/489	35/18496	0.0132156	0.132829	HBEGF/AREG/ITGA5/EREG	4
MF	GO:0090482	vitamin transmembrane transporter activity	4/489	35/18496	0.0132156	0.132829	SLC2A14/SLC2A3/SLC19A2/RBP4	4
BP	GO:0010092	specification of animal organ identity	4/485	36/18870	0.0132517	0.0559915	LRP2/BMP4/WNT2B/BMP2	4
BP	GO:0016486	peptide hormone processing	4/485	36/18870	0.0132517	0.0559915	BCHE/DPP4/DISP1/SCG5	4
BP	GO:1905332	positive regulation of morphogenesis of an epithelium	4/485	36/18870	0.0132517	0.0559915	LIF/BMP4/WNT2B/VEGFA	4
BP	GO:2000352	negative regulation of endothelial cell apoptotic process	4/485	36/18870	0.0132517	0.0559915	ICAM1/TNFAIP3/SERPINE1/KDR	4
BP	GO:0002753	cytosolic pattern recognition receptor signaling pathway	9/485	146/18870	0.0132766	0.0560254	TNFAIP3/FBXL2/RNF135/BIRC3/OAS1/NLRC3/PELI1/PYCARD/COLEC12	9
BP	GO:0002686	negative regulation of leukocyte migration	5/485	55/18870	0.0133137	0.0560398	CCL2/DPP4/TNFAIP6/DUSP1/HMOX1	5
BP	GO:0045071	negative regulation of viral genome replication	5/485	55/18870	0.0133137	0.0560398	SLPI/TRIM6/IFIT1/OAS1/ISG20	5
BP	GO:0031669	cellular response to nutrient levels	13/485	251/18870	0.0133694	0.0561326	CDKN1A/ATF3/SLC7A5/FOS/PIM1/KCNB1/KLF10/MN1/FAM107A/UPP1/WNT2B/PCK1/PDK4	13
BP	GO:1901617	organic hydroxy compound biosynthetic process	13/485	251/18870	0.0133694	0.0561326	CH25H/NR4A2/ITPKC/ALOX15/SPHK1/GCH1/PCK2/INSIG1/CDH3/NFKB1/PCK1/BMP2/RAB38	13
BP	GO:0043536	positive regulation of blood vessel endothelial cell migration	6/485	76/18870	0.0134361	0.0562707	THBS1/PTGS2/KDR/HMOX1/VEGFA/ETS1	6
BP	GO:0051145	smooth muscle cell differentiation	6/485	76/18870	0.0134361	0.0562707	MIR21/MIR22/PRDM6/BMP4/EREG/VEGFA	6
MF	GO:0004896	cytokine receptor activity	7/489	96/18496	0.0136934	0.135447	IL1RL1/CX3CR1/IL4R/IL15RA/ACKR4/OSMR/IL1RAP	7
BP	GO:2000377	regulation of reactive oxygen species metabolic process	9/485	147/18870	0.0138326	0.0573734	CDKN1A/MIR21/HP/IER3/THBS1/GADD45A/GCH1/CYP1B1/RAB27A	9
BP	GO:0051348	negative regulation of transferase activity	12/485	225/18870	0.0138423	0.0573734	ZFP36/CDKN1A/GPRC5A/RGS2/GADD45A/ERRFI1/IL1B/DUSP1/UBASH3B/PYCARD/CEBPA/BMP2	12
BP	GO:0035795	negative regulation of mitochondrial membrane permeability	3/485	20/18870	0.0138946	0.0573734	IER3/BOK/MIR17	3
BP	GO:0051546	keratinocyte migration	3/485	20/18870	0.0138946	0.0573734	HBEGF/HAS2/LRG1	3
BP	GO:0051900	regulation of mitochondrial depolarization	3/485	20/18870	0.0138946	0.0573734	KDR/BOK/GCLM	3
BP	GO:0060749	mammary gland alveolus development	3/485	20/18870	0.0138946	0.0573734	AREG/SOCS2/VEGFA	3
BP	GO:0061377	mammary gland lobule development	3/485	20/18870	0.0138946	0.0573734	AREG/SOCS2/VEGFA	3
BP	GO:0071474	cellular hyperosmotic response	3/485	20/18870	0.0138946	0.0573734	AQP1/FBP1/PCK1	3
BP	GO:0097623	potassium ion export across plasma membrane	3/485	20/18870	0.0138946	0.0573734	KCNT2/MIR21/KCNB1	3
BP	GO:1903978	regulation of microglial cell activation	3/485	20/18870	0.0138946	0.0573734	IL6/SPHK1/LDLR	3
BP	GO:0072163	mesonephric epithelium development	7/485	99/18870	0.0139062	0.0573734	MYC/BMP4/OSR1/WNT2B/SDC4/VEGFA/BMP2	7
BP	GO:0072164	mesonephric tubule development	7/485	99/18870	0.0139062	0.0573734	MYC/BMP4/OSR1/WNT2B/SDC4/VEGFA/BMP2	7
BP	GO:0033674	positive regulation of kinase activity	16/485	337/18870	0.0141135	0.0581564	CDKN1A/EGR1/IL18/MIR21/THBS1/CALCA/IL1B/EPHA2/KDR/TNFRSF10B/ETAA1/EREG/PDGFC/VEGFA/CEMIP/CSF1R	16
BP	GO:0007613	memory	8/485	123/18870	0.0141675	0.0581633	LRRN4/PTGS2/SYT4/ITGA5/SGK1/ARC/LDLR/CX3CR1	8
BP	GO:0032479	regulation of type I interferon production	8/485	123/18870	0.0141675	0.0581633	MIR21/IRF1/REL/RNF135/OAS1/NLRC3/ARRDC4/PYCARD	8
BP	GO:0032606	type I interferon production	8/485	123/18870	0.0141675	0.0581633	MIR21/IRF1/REL/RNF135/OAS1/NLRC3/ARRDC4/PYCARD	8
BP	GO:0032091	negative regulation of protein binding	6/485	77/18870	0.0142654	0.0584209	CDKN1A/XIRP1/SLPI/PTPRF/IFIT1/DACT1	6
BP	GO:0072078	nephron tubule morphogenesis	6/485	77/18870	0.0142654	0.0584209	MYC/BMP4/OSR1/WNT2B/VEGFA/BMP2	6
BP	GO:0042180	cellular ketone metabolic process	12/485	226/18870	0.0142912	0.0584546	NR4A3/EGR1/HSD17B6/MIR21/PTGS2/IL1B/SLC7A7/INSIG1/RDH10/FMO1/PDK4/BMP2	12
BP	GO:0001836	release of cytochrome c from mitochondria	5/485	56/18870	0.014319	0.0584965	MCL1/PLAUR/BOK/BCL2A1/PYCARD	5
BP	GO:0033280	response to vitamin D	4/485	37/18870	0.0145636	0.0594228	PIM1/PTGS2/STC1/MN1	4
BP	GO:0060349	bone morphogenesis	7/485	100/18870	0.0146332	0.059634	HAS2/FOSL2/STC1/BMP4/CHSY1/INSIG1/COL3A1	7
BP	GO:0050806	positive regulation of synaptic transmission	10/485	174/18870	0.0147116	0.0598801	EFNB3/CCL2/NSG1/PTGS2/CALB2/ARC/NMU/CX3CR1/CA2/FAM107A	10
BP	GO:0045860	positive regulation of protein kinase activity	14/485	282/18870	0.0147383	0.0599154	CDKN1A/EGR1/IL18/MIR21/THBS1/CALCA/IL1B/TNFRSF10B/ETAA1/EREG/PDGFC/VEGFA/CEMIP/CSF1R	14
CC	GO:0045177	apical part of cell	20/497	469/19886	0.0148016	0.255031	SLC7A5/LRP2/RAB27B/CA12/DPP4/UPK1B/STC1/AQP1/MAL2/KCNB1/RAB17/LDLR/CLDN1/RAB27A/CA2/MYO5B/SLC22A4/OSMR/C5AR1/BYSL	20
MF	GO:0004745	NAD-retinol dehydrogenase activity	3/489	20/18496	0.0149832	0.144316	HSD17B6/RDH10/ADH1C	3
BP	GO:0046467	membrane lipid biosynthetic process	9/485	149/18870	0.014996	0.0608888	ST3GAL5/B3GNT5/SPHK1/SGMS2/PIGV/PIGA/UGCG/PGAP1/B4GALT5	9
MF	GO:0019955	cytokine binding	9/489	145/18496	0.0150532	0.144316	ZFP36/IL1RN/THBS1/IL1RL1/CX3CR1/ACKR1/ACKR4/CSF1R/OSMR	9
BP	GO:0051259	protein complex oligomerization	13/485	255/18870	0.0150668	0.0611019	KCNB1/RNF135/ARC/ATL1/CLDN1/MAT2A/KCTD14/ITLN1/BOK/MLKL/PYCARD/COL1A2/STEAP4	13
BP	GO:0042509	regulation of tyrosine phosphorylation of STAT protein	6/485	78/18870	0.0151296	0.0612818	SOCS3/IL6/LIF/IL18/CLCF1/CSF1R	6
BP	GO:0043331	response to dsRNA	5/485	57/18870	0.015374	0.062173	DDX21/IFIT1/PELI1/NFKB1/COLEC12	5
BP	GO:0120162	positive regulation of cold-induced thermogenesis	7/485	101/18870	0.015387	0.062173	IL18/GADD45G/KDM6B/IL4R/GPR3/PDGFC/VEGFA	7
BP	GO:0045667	regulation of osteoblast differentiation	9/485	150/18870	0.015604	0.0628973	IL6/CEBPD/MIR21/AREG/TNFAIP6/BMP4/MIR17/CEBPA/BMP2	9
BP	GO:0051092	positive regulation of NF-kappaB transcription factor activity	9/485	150/18870	0.015604	0.0628973	IL18/SPHK1/TRAF5/IL1B/CX3CR1/TRIM6/TRIM68/PYCARD/IL1RAP	9
BP	GO:0002695	negative regulation of leukocyte activation	11/485	202/18870	0.0156501	0.0630069	MIR21/TNFAIP3/IRF1/CD274/LDLR/BMP4/IL4R/PLA2G2A/INHBA/PELI1/SDC4	11
BP	GO:0010634	positive regulation of epithelial cell migration	10/485	176/18870	0.0158207	0.0633898	HBEGF/HAS2/MIR21/THBS1/PTGS2/KDR/HMOX1/ANXA3/VEGFA/ETS1	10
BP	GO:0032402	melanosome transport	3/485	21/18870	0.0159067	0.0633898	RAB17/RAB27A/CDH3	3
BP	GO:0033005	positive regulation of mast cell activation	3/485	21/18870	0.0159067	0.0633898	NR4A3/VAMP8/IL4R	3
BP	GO:0044321	response to leptin	3/485	21/18870	0.0159067	0.0633898	NR4A3/LRP2/UGCG	3
BP	GO:0090189	regulation of branching involved in ureteric bud morphogenesis	3/485	21/18870	0.0159067	0.0633898	BMP4/WNT2B/VEGFA	3
BP	GO:0002369	T cell cytokine production	4/485	38/18870	0.0159547	0.0633898	IL6/ARID5A/IL18/IL1B	4
BP	GO:0002724	regulation of T cell cytokine production	4/485	38/18870	0.0159547	0.0633898	IL6/ARID5A/IL18/IL1B	4
BP	GO:0007616	long-term memory	4/485	38/18870	0.0159547	0.0633898	LRRN4/SGK1/ARC/LDLR	4
BP	GO:0035633	maintenance of blood-brain barrier	4/485	38/18870	0.0159547	0.0633898	IL6/PTGS2/CLDN1/VEGFA	4
BP	GO:0045429	positive regulation of nitric oxide biosynthetic process	4/485	38/18870	0.0159547	0.0633898	PTX3/PTGS2/KLF4/IL1B	4
BP	GO:0048536	spleen development	4/485	38/18870	0.0159547	0.0633898	BCL3/NFKBIZ/EPB42/FADD	4
BP	GO:0001649	osteoblast differentiation	13/485	257/18870	0.015975	0.0633948	IL6/CEBPD/JUNB/MIR21/FOSL2/AREG/TNFAIP6/BMP4/EPHA2/DDX21/MIR17/CEBPA/BMP2	13
BP	GO:0003002	regionalization	19/485	430/18870	0.0160018	0.0634257	BTG2/LRP2/SOX17/DISP1/EGR2/C3/HES4/HOXB2/BHLHE40/ARC/ETS2/BMP4/OSR1/CHSY1/MEOX2/PGAP1/WNT2B/ARL13B/BMP2	19
BP	GO:0046364	monosaccharide biosynthetic process	7/485	102/18870	0.0161679	0.0638245	SIK1/ATF3/MST1/PCK2/RBP4/FBP1/PCK1	7
BP	GO:0003014	renal system process	8/485	126/18870	0.0161788	0.0638245	HAS2/STC1/AQP1/SGK1/SULF1/BMP4/MYO5B/RHPN2	8
BP	GO:0001763	morphogenesis of a branching structure	11/485	203/18870	0.0161789	0.0638245	SOCS3/MYC/AREG/SULF1/BMP4/EPHA2/KDR/RDH10/WNT2B/VEGFA/BMP2	11
BP	GO:0009743	response to carbohydrate	12/485	230/18870	0.0161983	0.0638245	EGR1/ICAM1/THBS1/PTGS2/KCNB1/IL1B/PCK2/FBP1/SYBU/GCLM/PCK1/COLEC12	12
BP	GO:0048705	skeletal system morphogenesis	12/485	230/18870	0.0161983	0.0638245	CSRNP1/HAS2/FOSL2/STC1/TIPARP/HOXB2/BMP4/OSR1/CHSY1/INSIG1/RDH10/COL3A1	12
BP	GO:0001890	placenta development	9/485	151/18870	0.01623	0.0638738	SOCS3/JUNB/FOSL1/KRT19/LIF/PTGS2/STC1/HTRA1/CEBPA	9
BP	GO:0002440	production of molecular mediator of immune response	15/485	314/18870	0.0162986	0.0640684	IL6/NR4A3/ARID5A/SLC7A5/IL18/NFKBIZ/IL1B/DDX21/IL4R/PANX1/RBP4/TRIM6/CLCF1/TRIL/PYCARD	15
BP	GO:0043010	camera-type eye development	16/485	344/18870	0.0168163	0.0660254	SLC25A25/GPM6A/AQP1/KLF4/BCAR3/FJX1/BMP4/EPHA2/CYP1B1/KDR/RBP4/INHBA/RDH10/WNT2B/VEGFA/MAB21L2	16
BP	GO:1903038	negative regulation of leukocyte cell-cell adhesion	9/485	152/18870	0.0168741	0.0661742	MIR21/IRF1/CD274/KLF4/BMP4/IL4R/PLA2G2A/PELI1/SDC4	9
BP	GO:0048844	artery morphogenesis	6/485	80/18870	0.0169657	0.0663192	LRP2/ADAMTS9/LDLR/BMP4/VEGFA/COL3A1	6
BP	GO:0001823	mesonephros development	7/485	103/18870	0.0169765	0.0663192	MYC/BMP4/OSR1/WNT2B/SDC4/VEGFA/BMP2	7
BP	GO:0045639	positive regulation of myeloid cell differentiation	7/485	103/18870	0.0169765	0.0663192	LIF/FOS/CSF3/KLF10/FADD/INHBA/ETS1	7
BP	GO:0060538	skeletal muscle organ development	10/485	178/18870	0.0169908	0.0663192	MAFF/BTG2/ATF3/NR4A1/EGR1/DISP1/FOS/EGR2/MEOX2/MSC	10
BP	GO:0043523	regulation of neuron apoptotic process	12/485	232/18870	0.017221	0.0671393	BTG2/EGR1/CCL2/NR4A2/KCNB1/MCL1/CX3CR1/KDR/EGLN3/BOK/CLCF1/GCLM	12
BP	GO:0032350	regulation of hormone metabolic process	4/485	39/18870	0.0174265	0.0677023	EGR1/RDH10/NFKB1/BMP2	4
BP	GO:0140448	signaling receptor ligand precursor processing	4/485	39/18870	0.0174265	0.0677023	BCHE/DPP4/DISP1/SCG5	4
BP	GO:1904407	positive regulation of nitric oxide metabolic process	4/485	39/18870	0.0174265	0.0677023	PTX3/PTGS2/KLF4/IL1B	4
MF	GO:0019887	protein kinase regulator activity	12/489	226/18496	0.0174349	0.163996	CDKN1A/SOCS3/GPRC5A/HBEGF/ITPRIP/AREG/CCNL1/CKS2/ETAA1/EREG/VEGFA/BMP2	12
BP	GO:0002886	regulation of myeloid leukocyte mediated immunity	5/485	59/18870	0.017637	0.0682813	C3/VAMP8/CX3CR1/DDX21/IL4R	5
BP	GO:0014009	glial cell proliferation	5/485	59/18870	0.017637	0.0682813	IL6/SLC7A5/AREG/IL1B/CSF1R	5
BP	GO:0060135	maternal process involved in female pregnancy	5/485	59/18870	0.017637	0.0682813	JUNB/LIF/RGS2/PTGS2/STC1	5
MF	GO:0004867	serine-type endopeptidase inhibitor activity	7/489	101/18496	0.0176821	0.163996	SLPI/SERPINE1/TFPI2/SERPINB1/SERPING1/SERPINB2/SERPINA3	7
BP	GO:0019218	regulation of steroid metabolic process	7/485	104/18870	0.0178133	0.0686155	CH25H/EGR1/LDLR/LDLRAP1/INSIG1/NFKB1/BMP2	7
BP	GO:0033138	positive regulation of peptidyl-serine phosphorylation	7/485	104/18870	0.0178133	0.0686155	IL6/LIF/PTGS2/CSF3/BCAR3/TRIM6/VEGFA	7
BP	GO:0042100	B cell proliferation	7/485	104/18870	0.0178133	0.0686155	CDKN1A/FOSL2/GPR183/NFKBIZ/PELI1/CLCF1/IL7	7
BP	GO:0061333	renal tubule morphogenesis	6/485	81/18870	0.0179389	0.0686155	MYC/BMP4/OSR1/WNT2B/VEGFA/BMP2	6
CC	GO:0030136	clathrin-coated vesicle	11/497	212/19886	0.0179828	0.29435	LRP2/RAB27B/HBEGF/AREG/LDLR/LDLRAP1/VAMP8/RAB27A/EREG/CEMIP/ASTN1	11
BP	GO:0002089	lens morphogenesis in camera-type eye	3/485	22/18870	0.0180737	0.0686155	BCAR3/BMP4/EPHA2	3
BP	GO:0003085	negative regulation of systemic arterial blood pressure	3/485	22/18870	0.0180737	0.0686155	IER3/CALCA/MIR17	3
BP	GO:0010866	regulation of triglyceride biosynthetic process	3/485	22/18870	0.0180737	0.0686155	SIK1/C3/LDLR	3
BP	GO:0010988	regulation of low-density lipoprotein particle clearance	3/485	22/18870	0.0180737	0.0686155	LDLR/LDLRAP1/MIR17	3
BP	GO:0030449	regulation of complement activation	3/485	22/18870	0.0180737	0.0686155	C3/IL1B/SERPING1	3
BP	GO:0032401	establishment of melanosome localization	3/485	22/18870	0.0180737	0.0686155	RAB17/RAB27A/CDH3	3
BP	GO:0035313	wound healing, spreading of epidermal cells	3/485	22/18870	0.0180737	0.0686155	HBEGF/ITGA5/LRG1	3
BP	GO:0051151	negative regulation of smooth muscle cell differentiation	3/485	22/18870	0.0180737	0.0686155	MIR21/PRDM6/EREG	3
BP	GO:0051904	pigment granule transport	3/485	22/18870	0.0180737	0.0686155	RAB17/RAB27A/CDH3	3
BP	GO:0072234	metanephric nephron tubule development	3/485	22/18870	0.0180737	0.0686155	LIF/AQP1/OSR1	3
BP	GO:1903589	positive regulation of blood vessel endothelial cell proliferation involved in sprouting angiogenesis	3/485	22/18870	0.0180737	0.0686155	MIR21/HMOX1/VEGFA	3
BP	GO:2000319	regulation of T-helper 17 cell differentiation	3/485	22/18870	0.0180737	0.0686155	JUNB/MIR21/NFKBIZ	3
BP	GO:2000725	regulation of cardiac muscle cell differentiation	3/485	22/18870	0.0180737	0.0686155	BMP4/FZD7/BMP2	3
MF	GO:0019199	transmembrane receptor protein kinase activity	6/489	79/18496	0.0181587	0.163996	EFNB3/EPHB6/EPHA2/KDR/PDGFRL/CSF1R	6
MF	GO:0046332	SMAD binding	6/489	79/18496	0.0181587	0.163996	FOS/JUN/TGIF1/COL1A2/COL3A1/BMP2	6
BP	GO:0051216	cartilage development	11/485	207/18870	0.0184285	0.0698829	ARID5A/MIR21/FOSL2/STC1/SULF1/BMP4/OSR1/CHSY1/WNT2B/COL3A1/BMP2	11
BP	GO:0009914	hormone transport	15/485	319/18870	0.0185196	0.0701484	IL6/SLC7A5/LIF/IL1RN/AQP1/KCNB1/IL1B/SCG5/PCK2/SLCO4A1/VAMP8/RBP4/INHBA/SYBU/SLC16A10	15
MF	GO:0061134	peptidase regulator activity	12/489	228/18496	0.0185475	0.165115	SLPI/C3/THBS1/SERPINE1/TFPI2/RARRES1/SERPINB1/SERPING1/C4A/PYCARD/SERPINB2/SERPINA3	12
BP	GO:0001658	branching involved in ureteric bud morphogenesis	5/485	60/18870	0.0188468	0.0709841	MYC/BMP4/WNT2B/VEGFA/BMP2	5
BP	GO:0002011	morphogenesis of an epithelial sheet	5/485	60/18870	0.0188468	0.0709841	HBEGF/FLRT3/ITGA5/HOXB2/LRG1	5
BP	GO:0042908	xenobiotic transport	5/485	60/18870	0.0188468	0.0709841	SLC7A5/SLC28A3/CLDN1/ATP7B/SLC22A4	5
BP	GO:0045604	regulation of epidermal cell differentiation	5/485	60/18870	0.0188468	0.0709841	MAFF/ZFP36/GRHL1/ERRFI1/BMP4	5
BP	GO:0045620	negative regulation of lymphocyte differentiation	5/485	60/18870	0.0188468	0.0709841	MIR21/IRF1/BMP4/IL4R/INHBA	5
BP	GO:0007260	tyrosine phosphorylation of STAT protein	6/485	82/18870	0.0189496	0.0711643	SOCS3/IL6/LIF/IL18/CLCF1/CSF1R	6
BP	GO:0006730	one-carbon metabolic process	4/485	40/18870	0.0189802	0.0711643	CA12/MAT2A/CA2/MTHFD2	4
BP	GO:0032728	positive regulation of interferon-beta production	4/485	40/18870	0.0189802	0.0711643	IRF1/RNF135/OAS1/ARRDC4	4
BP	GO:0070232	regulation of T cell apoptotic process	4/485	40/18870	0.0189802	0.0711643	BCL3/CD274/BMP4/FADD	4
BP	GO:0071383	cellular response to steroid hormone stimulus	11/485	208/18870	0.0190255	0.0712542	ZFP36/NR4A3/STC1/AQP1/SGK1/PCK2/CYP1B1/MGARP/TRIM68/FAM107A/PCK1	11
BP	GO:0010595	positive regulation of endothelial cell migration	8/485	130/18870	0.0191709	0.0714769	MIR21/THBS1/PTGS2/KDR/HMOX1/ANXA3/VEGFA/ETS1	8
BP	GO:0032612	interleukin-1 production	8/485	130/18870	0.0191709	0.0714769	IL6/EGR1/TNFAIP3/SPHK1/CX3CR1/PANX1/SERPINB1/PYCARD	8
BP	GO:0032652	regulation of interleukin-1 production	8/485	130/18870	0.0191709	0.0714769	IL6/EGR1/TNFAIP3/SPHK1/CX3CR1/PANX1/SERPINB1/PYCARD	8
BP	GO:0050864	regulation of B cell activation	8/485	130/18870	0.0191709	0.0714769	CDKN1A/IL6/TNFAIP3/GPR183/INHBA/PELI1/CLCF1/IL7	8
BP	GO:0014706	striated muscle tissue development	13/485	264/18870	0.0194843	0.0725644	SIK1/LRP2/RGS2/PIM1/ADAMTS9/KDM6B/BMP4/FZD7/RBP4/VEGFA/IFRD1/BMP2/MSC	13
BP	GO:0032526	response to retinoic acid	7/485	106/18870	0.0195731	0.0728136	AQP1/KLF4/OSR1/ASXL1/FZD7/RBP4/PCK1	7
CC	GO:0005925	focal adhesion	18/497	421/19886	0.0196254	0.305941	FLRT3/XIRP1/DPP4/ICAM1/RND3/PROCR/IL1RL1/ITGA5/BCAR3/FLRT2/PLAUR/EPHA2/FLNC/FAM107A/PLAU/SDC4/CNN1/AKAP12	18
BP	GO:0010950	positive regulation of endopeptidase activity	9/485	156/18870	0.0196385	0.0728939	MYC/MIR21/FADD/DAPK1/EGLN3/SOX7/BOK/MIR17/PYCARD	9
BP	GO:0048754	branching morphogenesis of an epithelial tube	9/485	156/18870	0.0196385	0.0728939	MYC/AREG/BMP4/EPHA2/KDR/RDH10/WNT2B/VEGFA/BMP2	9
BP	GO:0048010	vascular endothelial growth factor receptor signaling pathway	5/485	61/18870	0.0201099	0.0744777	ITGA5/SULF1/IL1B/KDR/VEGFA	5
BP	GO:1905517	macrophage migration	5/485	61/18870	0.0201099	0.0744777	CCL2/THBS1/CX3CR1/CSF1R/C5AR1	5
MF	GO:0005516	calmodulin binding	11/489	204/18496	0.0201244	0.176629	ITPKC/RGS2/RGS1/FBXL2/GEM/SPHK1/RGS16/DAPK1/MYO5B/CNN1/AKAP12	11
BP	GO:0001759	organ induction	3/485	23/18870	0.0203964	0.0747077	BMP4/WNT2B/BMP2	3
BP	GO:0016338	calcium-independent cell-cell adhesion via plasma membrane cell-adhesion molecules	3/485	23/18870	0.0203964	0.0747077	CLDN15/CLDN1/BMP2	3
BP	GO:0045932	negative regulation of muscle contraction	3/485	23/18870	0.0203964	0.0747077	RGS2/PTGS2/CALCA	3
BP	GO:0046597	negative regulation of viral entry into host cell	3/485	23/18870	0.0203964	0.0747077	CH25H/PTX3/LY6E	3
BP	GO:0051882	mitochondrial depolarization	3/485	23/18870	0.0203964	0.0747077	KDR/BOK/GCLM	3
BP	GO:0051905	establishment of pigment granule localization	3/485	23/18870	0.0203964	0.0747077	RAB17/RAB27A/CDH3	3
BP	GO:0060252	positive regulation of glial cell proliferation	3/485	23/18870	0.0203964	0.0747077	IL6/SLC7A5/IL1B	3
BP	GO:0071359	cellular response to dsRNA	3/485	23/18870	0.0203964	0.0747077	IFIT1/NFKB1/COLEC12	3
BP	GO:0140112	extracellular vesicle biogenesis	3/485	23/18870	0.0203964	0.0747077	RAB27A/ARRDC4/SDC4	3
BP	GO:1905709	negative regulation of membrane permeability	3/485	23/18870	0.0203964	0.0747077	IER3/BOK/MIR17	3
BP	GO:0002526	acute inflammatory response	7/485	107/18870	0.0204971	0.0749939	IL6/HP/C3/PTGS2/IL1B/OSMR/SERPINA3	7
BP	GO:0048246	macrophage chemotaxis	4/485	41/18870	0.0206169	0.0753496	CCL2/THBS1/CSF1R/C5AR1	4
MF	GO:0016705	oxidoreductase activity, acting on paired donors, with incorporation or reduction of molecular oxygen	10/489	179/18496	0.0209333	0.181177	CH25H/PTGS2/PTGS1/KDM7A/KDM6B/CYP1B1/EGLN3/HMOX1/CYP4X1/FMO1	10
CC	GO:0030665	clathrin-coated vesicle membrane	8/497	136/19886	0.0210669	0.313483	LRP2/HBEGF/AREG/LDLR/LDLRAP1/VAMP8/EREG/CEMIP	8
BP	GO:0001523	retinoid metabolic process	6/485	84/18870	0.0210863	0.076812	LRP2/HSD17B6/CYP1B1/RBP4/RDH10/ADH1C	6
BP	GO:0050871	positive regulation of B cell activation	6/485	84/18870	0.0210863	0.076812	CDKN1A/IL6/GPR183/PELI1/CLCF1/IL7	6
BP	GO:0072332	intrinsic apoptotic signaling pathway by p53 class mediator	6/485	84/18870	0.0210863	0.076812	CDKN1A/MYC/MIR21/BCL3/BOK/PYCARD	6
BP	GO:0015695	organic cation transport	5/485	62/18870	0.0214272	0.0779686	SLC19A2/KCNB1/SLC18B1/SLC22A4/ADORA3	5
BP	GO:0030879	mammary gland development	8/485	133/18870	0.0216602	0.0786446	AREG/SOCS2/BMP4/EPHA2/ATP7B/VEGFA/NFKB1/CSF1R	8
BP	GO:0050868	negative regulation of T cell activation	8/485	133/18870	0.0216602	0.0786446	MIR21/IRF1/CD274/BMP4/IL4R/PLA2G2A/PELI1/SDC4	8
BP	GO:0035966	response to topologically incorrect protein	9/485	159/18870	0.0219167	0.0794892	ATF3/THBS1/DNAJB1/PPP1R15A/PPP1R15B/KLHL15/KBTBD6/BOK/HSPA6	9
BP	GO:0090092	regulation of transmembrane receptor protein serine/threonine kinase signaling pathway	14/485	297/18870	0.0219864	0.0796553	LRP2/MIR21/THBS1/TNFAIP6/HTRA1/SULF1/BMP4/KDR/INHBA/FST/MIR17/FSTL3/LRG1/BMP2	14
BP	GO:0045069	regulation of viral genome replication	6/485	85/18870	0.0222133	0.0803899	SLPI/CXCL8/TRIM6/IFIT1/OAS1/ISG20	6
BP	GO:0003018	vascular process in circulatory system	13/485	269/18870	0.0223253	0.0804904	SLC7A5/LRP2/GPR4/SLC2A3/RGS2/MIR21/PTGS2/CALCA/SLC24A3/GCH1/VEGFA/GCLM/AKAP12	13
BP	GO:0042092	type 2 immune response	4/485	42/18870	0.0223378	0.0804904	IL6/IL18/BCL3/IL4R	4
BP	GO:0042119	neutrophil activation	4/485	42/18870	0.0223378	0.0804904	IL18/CXCL8/PLA2G2A/ANXA3	4
BP	GO:2000403	positive regulation of lymphocyte migration	4/485	42/18870	0.0223378	0.0804904	FADD/CCL7/CCL20/PYCARD	4
BP	GO:0034329	cell junction assembly	19/485	446/18870	0.0224308	0.080667	EFNB3/CLDN15/CBLN2/VMP1/FLRT3/THBS1/GPM6A/ITGA5/RAB17/FLRT2/CLDN1/IL1B/EPHA2/KDR/CDH3/FAM107A/SDC4/VEGFA/IL1RAP	19
BP	GO:0001776	leukocyte homeostasis	7/485	109/18870	0.0224353	0.080667	IL6/TNFAIP3/GPR183/FADD/DOCK11/LGALS2/PDE4B	7
BP	GO:0042326	negative regulation of phosphorylation	15/485	327/18870	0.0225443	0.0806845	CDKN1A/SOCS3/GPRC5A/RGS2/PPP1R15B/GADD45A/ERRFI1/IL1B/DUSP1/UBASH3B/INHBA/DUSP6/PYCARD/CEBPA/BMP2	15
MF	GO:0001046	core promoter sequence-specific DNA binding	4/489	41/18496	0.022596	0.192889	MYC/FOS/KLF10/AGO2	4
BP	GO:0002090	regulation of receptor internalization	5/485	63/18870	0.0227994	0.0806845	SELE/WDR54/ARC/RSPO1/VEGFA	5
BP	GO:0006687	glycosphingolipid metabolic process	5/485	63/18870	0.0227994	0.0806845	ST3GAL5/CREM/UGCG/B4GALT5/GLA	5
BP	GO:0046173	polyol biosynthetic process	5/485	63/18870	0.0227994	0.0806845	ITPKC/SPHK1/GCH1/PCK2/PCK1	5
BP	GO:0051893	regulation of focal adhesion assembly	5/485	63/18870	0.0227994	0.0806845	THBS1/KDR/FAM107A/SDC4/VEGFA	5
BP	GO:0090109	regulation of cell-substrate junction assembly	5/485	63/18870	0.0227994	0.0806845	THBS1/KDR/FAM107A/SDC4/VEGFA	5
BP	GO:0140895	cell surface toll-like receptor signaling pathway	5/485	63/18870	0.0227994	0.0806845	TNFAIP3/OAS1/PELI1/TRIL/TLR5	5
BP	GO:0002070	epithelial cell maturation	3/485	24/18870	0.0228753	0.0806845	CDKN1A/KDR/CEBPA	3
BP	GO:0003091	renal water homeostasis	3/485	24/18870	0.0228753	0.0806845	HAS2/AQP1/MYO5B	3
BP	GO:0009651	response to salt stress	3/485	24/18870	0.0228753	0.0806845	AQP1/FBP1/PCK1	3
BP	GO:0032400	melanosome localization	3/485	24/18870	0.0228753	0.0806845	RAB17/RAB27A/CDH3	3
BP	GO:0034114	regulation of heterotypic cell-cell adhesion	3/485	24/18870	0.0228753	0.0806845	IL1RN/KLF4/IL1B	3
BP	GO:0035357	peroxisome proliferator activated receptor signaling pathway	3/485	24/18870	0.0228753	0.0806845	ALOX15/ASXL1/BMP2	3
BP	GO:0046426	negative regulation of receptor signaling pathway via JAK-STAT	3/485	24/18870	0.0228753	0.0806845	SOCS3/BCL3/SOCS2	3
BP	GO:0046885	regulation of hormone biosynthetic process	3/485	24/18870	0.0228753	0.0806845	EGR1/NFKB1/BMP2	3
BP	GO:0071549	cellular response to dexamethasone stimulus	3/485	24/18870	0.0228753	0.0806845	AQP1/PCK2/PCK1	3
BP	GO:2001026	regulation of endothelial cell chemotaxis	3/485	24/18870	0.0228753	0.0806845	THBS1/KDR/VEGFA	3
BP	GO:0090287	regulation of cellular response to growth factor stimulus	16/485	357/18870	0.0228763	0.0806845	LRP2/MIR21/THBS1/TNFAIP6/ITGA5/HTRA1/SULF1/BMP4/IL1B/KDR/FST/MIR17/FSTL3/VEGFA/LRG1/BMP2	16
BP	GO:0010469	regulation of signaling receptor activity	7/485	110/18870	0.0234503	0.0826215	CCL2/GPRC5A/SERPINE1/ARC/ERRFI1/DAPK1/PLAU	7
CC	GO:0030055	cell-substrate junction	18/497	431/19886	0.0241263	0.334466	FLRT3/XIRP1/DPP4/ICAM1/RND3/PROCR/IL1RL1/ITGA5/BCAR3/FLRT2/PLAUR/EPHA2/FLNC/FAM107A/PLAU/SDC4/CNN1/AKAP12	18
BP	GO:0014002	astrocyte development	4/485	43/18870	0.0241437	0.0848847	IL6/LDLR/IL1B/C5AR1	4
BP	GO:1904037	positive regulation of epithelial cell apoptotic process	4/485	43/18870	0.0241437	0.0848847	IL6/CCL2/THBS1/HMOX1	4
BP	GO:0001885	endothelial cell development	5/485	64/18870	0.0242272	0.0850884	ICAM1/STC1/CLDN1/IL1B/VEGFA	5
BP	GO:0048592	eye morphogenesis	9/485	162/18870	0.0243786	0.08544	AQP1/BCAR3/FJX1/BMP4/EPHA2/KDR/RBP4/WNT2B/VEGFA	9
BP	GO:0051147	regulation of muscle cell differentiation	9/485	162/18870	0.0243786	0.08544	SIK1/RGS2/MIR21/MIR22/PRDM6/BMP4/FZD7/EREG/BMP2	9
BP	GO:0060840	artery development	7/485	111/18870	0.0244966	0.0857633	LRP2/EGR2/ADAMTS9/LDLR/BMP4/VEGFA/COL3A1	7
MF	GO:1902936	phosphatidylinositol bisphosphate binding	7/489	108/18496	0.0245484	0.204521	ANXA8/ALOX15/LDLRAP1/FZD7/ADAP2/CAPG/ANXA9	7
BP	GO:0016101	diterpenoid metabolic process	6/485	87/18870	0.0245877	0.0859918	LRP2/HSD17B6/CYP1B1/RBP4/RDH10/ADH1C	6
MF	GO:0016702	oxidoreductase activity, acting on single donors with incorporation of molecular oxygen, incorporation of two atoms of oxygen	3/489	24/18496	0.024615	0.204521	PTGS2/ALOX15/PTGS1	3
BP	GO:0006986	response to unfolded protein	8/485	137/18870	0.0253237	0.0866795	ATF3/THBS1/DNAJB1/PPP1R15A/PPP1R15B/KBTBD6/BOK/HSPA6	8
BP	GO:0010561	negative regulation of glycoprotein biosynthetic process	3/485	25/18870	0.0255104	0.0866795	HBEGF/AGO2/MIR17	3
BP	GO:0035988	chondrocyte proliferation	3/485	25/18870	0.0255104	0.0866795	MIR21/FOSL2/STC1	3
BP	GO:0043153	entrainment of circadian clock by photoperiod	3/485	25/18870	0.0255104	0.0866795	SIK1/RBM4B/BHLHE40	3
BP	GO:0045649	regulation of macrophage differentiation	3/485	25/18870	0.0255104	0.0866795	LIF/FADD/INHBA	3
BP	GO:0050927	positive regulation of positive chemotaxis	3/485	25/18870	0.0255104	0.0866795	CXCL8/KDR/VEGFA	3
BP	GO:0051875	pigment granule localization	3/485	25/18870	0.0255104	0.0866795	RAB17/RAB27A/CDH3	3
BP	GO:0070233	negative regulation of T cell apoptotic process	3/485	25/18870	0.0255104	0.0866795	BCL3/BMP4/FADD	3
BP	GO:0072170	metanephric tubule development	3/485	25/18870	0.0255104	0.0866795	LIF/AQP1/OSR1	3
BP	GO:0072243	metanephric nephron epithelium development	3/485	25/18870	0.0255104	0.0866795	LIF/AQP1/OSR1	3
BP	GO:0090335	regulation of brown fat cell differentiation	3/485	25/18870	0.0255104	0.0866795	PIM1/PTGS2/METRNL	3
BP	GO:1904754	positive regulation of vascular associated smooth muscle cell migration	3/485	25/18870	0.0255104	0.0866795	NR4A3/MIR21/ADAMTS1	3
BP	GO:0030203	glycosaminoglycan metabolic process	7/485	112/18870	0.0255745	0.0866795	HAS2/TNFAIP6/IL1B/CHSY1/HAS1/CEMIP/NFKB1	7
BP	GO:0001701	in utero embryonic development	17/485	392/18870	0.0256416	0.0866795	MAFF/SOCS3/JUNB/FOSL1/KRT19/LIF/SOX17/KLF4/DSC3/TEAD4/RDH10/RBBP8/VEGFA/COL3A1/CEBPA/BYSL/BMP2	17
CC	GO:0009925	basal plasma membrane	13/497	282/19886	0.0256743	0.334466	SLC7A5/CA12/AQP1/RAB17/LDLR/CLDN1/ATP7B/LDLRAP1/SLC7A7/SLC22A4/SLC16A6/C5AR1/SLC16A10	13
BP	GO:0030888	regulation of B cell proliferation	5/485	65/18870	0.0257113	0.0866795	CDKN1A/GPR183/PELI1/CLCF1/IL7	5
BP	GO:0032613	interleukin-10 production	5/485	65/18870	0.0257113	0.0866795	IL6/BCL3/CD274/CD83/PYCARD	5
BP	GO:0032653	regulation of interleukin-10 production	5/485	65/18870	0.0257113	0.0866795	IL6/BCL3/CD274/CD83/PYCARD	5
BP	GO:0042594	response to starvation	11/485	218/18870	0.0258084	0.0866795	ZFP36/CDKN1A/ATF3/SLC7A5/FOS/KLF10/PCK2/UPP1/WNT2B/PCK1/PDK4	11
BP	GO:0046330	positive regulation of JNK cascade	6/485	88/18870	0.0258361	0.0866795	GADD45B/GADD45G/GADD45A/IL1B/FZD7/PYCARD	6
BP	GO:0015820	leucine transport	2/485	10/18870	0.0258778	0.0866795	SLC7A5/SLC7A7	2
BP	GO:0021561	facial nerve development	2/485	10/18870	0.0258778	0.0866795	EGR2/HOXB2	2
BP	GO:0021604	cranial nerve structural organization	2/485	10/18870	0.0258778	0.0866795	EGR2/HOXB2	2
BP	GO:0021610	facial nerve morphogenesis	2/485	10/18870	0.0258778	0.0866795	EGR2/HOXB2	2
BP	GO:0032353	negative regulation of hormone biosynthetic process	2/485	10/18870	0.0258778	0.0866795	NFKB1/BMP2	2
BP	GO:0032377	regulation of intracellular lipid transport	2/485	10/18870	0.0258778	0.0866795	LDLRAP1/MIR17	2
BP	GO:0035747	natural killer cell chemotaxis	2/485	10/18870	0.0258778	0.0866795	CCL2/CCL7	2
BP	GO:0038130	ERBB4 signaling pathway	2/485	10/18870	0.0258778	0.0866795	HBEGF/EREG	2
BP	GO:0042538	hyperosmotic salinity response	2/485	10/18870	0.0258778	0.0866795	FBP1/PCK1	2
BP	GO:0044650	adhesion of symbiont to host cell	2/485	10/18870	0.0258778	0.0866795	DPP4/ICAM1	2
BP	GO:0048023	positive regulation of melanin biosynthetic process	2/485	10/18870	0.0258778	0.0866795	CDH3/RAB38	2
BP	GO:0051409	response to nitrosative stress	2/485	10/18870	0.0258778	0.0866795	DUSP6/GCLM	2
BP	GO:0060068	vagina development	2/485	10/18870	0.0258778	0.0866795	LRP2/RBP4	2
BP	GO:0060430	lung saccule development	2/485	10/18870	0.0258778	0.0866795	FOSL2/ASXL1	2
BP	GO:0061418	regulation of transcription from RNA polymerase II promoter in response to hypoxia	2/485	10/18870	0.0258778	0.0866795	EGR1/VEGFA	2
BP	GO:0071372	cellular response to follicle-stimulating hormone stimulus	2/485	10/18870	0.0258778	0.0866795	INHBA/GCLM	2
BP	GO:0099550	trans-synaptic signaling, modulating synaptic transmission	2/485	10/18870	0.0258778	0.0866795	EFNB3/SYT4	2
BP	GO:0150172	regulation of phosphatidylcholine metabolic process	2/485	10/18870	0.0258778	0.0866795	LDLR/RAB38	2
BP	GO:1900378	positive regulation of secondary metabolite biosynthetic process	2/485	10/18870	0.0258778	0.0866795	CDH3/RAB38	2
BP	GO:1904760	regulation of myofibroblast differentiation	2/485	10/18870	0.0258778	0.0866795	MIR21/FOSL2	2
BP	GO:1905050	positive regulation of metallopeptidase activity	2/485	10/18870	0.0258778	0.0866795	MIR21/MIR17	2
BP	GO:2000121	regulation of removal of superoxide radicals	2/485	10/18870	0.0258778	0.0866795	MIR21/GCH1	2
BP	GO:2000826	regulation of heart morphogenesis	2/485	10/18870	0.0258778	0.0866795	BMP4/BMP2	2
BP	GO:0050691	regulation of defense response to virus by host	4/485	44/18870	0.0260355	0.0867711	TNFAIP3/IL1B/TRIM6/PYCARD	4
BP	GO:0060338	regulation of type I interferon-mediated signaling pathway	4/485	44/18870	0.0260355	0.0867711	MIR21/FADD/TRIM6/OAS1	4
BP	GO:0070741	response to interleukin-6	4/485	44/18870	0.0260355	0.0867711	IL6/NFKB1/PCK1/CEBPA	4
BP	GO:0090051	negative regulation of cell migration involved in sprouting angiogenesis	4/485	44/18870	0.0260355	0.0867711	THBS1/KLF4/MIR22/MEOX2	4
BP	GO:0090207	regulation of triglyceride metabolic process	4/485	44/18870	0.0260355	0.0867711	SIK1/AADAC/C3/LDLR	4
BP	GO:0001933	negative regulation of protein phosphorylation	14/485	304/18870	0.026165	0.0871157	CDKN1A/SOCS3/GPRC5A/RGS2/PPP1R15B/GADD45A/ERRFI1/IL1B/DUSP1/UBASH3B/DUSP6/PYCARD/CEBPA/BMP2	14
BP	GO:0031099	regeneration	10/485	191/18870	0.0262073	0.0871693	CDKN1A/IL6/NR4A3/SLC7A5/PTPRF/KLF4/CLDN1/FZD7/ANXA3/IFRD1	10
BP	GO:0033135	regulation of peptidyl-serine phosphorylation	8/485	138/18870	0.0263031	0.0874008	IL6/LIF/PTGS2/CSF3/BCAR3/GADD45A/TRIM6/VEGFA	8
BP	GO:0048738	cardiac muscle tissue development	12/485	247/18870	0.0265047	0.0879828	SIK1/LRP2/RGS2/PIM1/ADAMTS9/KDM6B/BMP4/FZD7/RBP4/VEGFA/BMP2/MSC	12
CC	GO:0031091	platelet alpha granule	6/497	91/19886	0.0265176	0.334466	THBS1/SERPINE1/F5/SERPING1/VEGFA/SERPINA3	6
CC	GO:0090575	RNA polymerase II transcription regulator complex	12/497	254/19886	0.0265637	0.334466	MAFF/CEBPD/JUNB/MYC/ATF3/FOSL1/NFIL3/FOSL2/FOS/JUN/CREM/CEBPA	12
BP	GO:1901222	regulation of non-canonical NF-kappaB signal transduction	7/485	113/18870	0.0266844	0.0884911	IL18/MIR21/BCL3/SPHK1/IL1B/NLRC3/PYCARD	7
BP	GO:0034340	response to type I interferon	6/485	89/18870	0.0271259	0.0898657	CH25H/MIR21/FADD/TRIM6/IFIT1/OAS1	6
BP	GO:0042531	positive regulation of tyrosine phosphorylation of STAT protein	5/485	66/18870	0.0272524	0.0901054	IL6/LIF/IL18/CLCF1/CSF1R	5
BP	GO:0045682	regulation of epidermis development	5/485	66/18870	0.0272524	0.0901054	MAFF/ZFP36/GRHL1/ERRFI1/BMP4	5
MF	GO:0015173	aromatic amino acid transmembrane transporter activity	2/489	10/18496	0.0272743	0.211074	SLC7A5/SLC16A10	2
MF	GO:0019203	carbohydrate phosphatase activity	2/489	10/18496	0.0272743	0.211074	FBP1/PFKFB3	2
MF	GO:0032050	clathrin heavy chain binding	2/489	10/18496	0.0272743	0.211074	LDLR/CEMIP	2
MF	GO:0036312	phosphatidylinositol 3-kinase regulatory subunit binding	2/489	10/18496	0.0272743	0.211074	FBXL2/NLRC3	2
MF	GO:0050308	sugar-phosphatase activity	2/489	10/18496	0.0272743	0.211074	FBP1/PFKFB3	2
BP	GO:0150063	visual system development	17/485	395/18870	0.0273168	0.0902287	SLC25A25/C3/GPM6A/AQP1/KLF4/BCAR3/FJX1/BMP4/EPHA2/CYP1B1/KDR/RBP4/INHBA/RDH10/WNT2B/VEGFA/MAB21L2	17
MF	GO:0016701	oxidoreductase activity, acting on single donors with incorporation of molecular oxygen	3/489	25/18496	0.0274361	0.211074	PTGS2/ALOX15/PTGS1	3
BP	GO:0007519	skeletal muscle tissue development	9/485	166/18870	0.027959	0.0918022	MAFF/BTG2/ATF3/NR4A1/EGR1/FOS/EGR2/MEOX2/MSC	9
BP	GO:0002703	regulation of leukocyte mediated immunity	12/485	249/18870	0.0279743	0.0918022	IL6/ARID5A/IL18/ICAM1/C3/IL1B/VAMP8/CX3CR1/FADD/DDX21/IL4R/CLCF1	12
BP	GO:0001825	blastocyst formation	4/485	45/18870	0.0280138	0.0918022	JUNB/SOX17/TEAD4/BYSL	4
BP	GO:0002347	response to tumor cell	4/485	45/18870	0.0280138	0.0918022	CD274/KLF4/DAPK1/TNFRSF10B	4
BP	GO:0032480	negative regulation of type I interferon production	4/485	45/18870	0.0280138	0.0918022	MIR21/REL/NLRC3/PYCARD	4
BP	GO:0071604	transforming growth factor beta production	4/485	45/18870	0.0280138	0.0918022	THBS1/PTGS2/CDH3/COL3A1	4
BP	GO:0140894	endolysosomal toll-like receptor signaling pathway	4/485	45/18870	0.0280138	0.0918022	TNFAIP3/OAS1/PELI1/COLEC12	4
BP	GO:1905521	regulation of macrophage migration	4/485	45/18870	0.0280138	0.0918022	THBS1/CX3CR1/CSF1R/C5AR1	4
BP	GO:0051402	neuron apoptotic process	13/485	278/18870	0.0282002	0.0923225	BTG2/EGR1/CCL2/NR4A2/KCNB1/MCL1/CX3CR1/FADD/KDR/EGLN3/BOK/CLCF1/GCLM	13
BP	GO:0050926	regulation of positive chemotaxis	3/485	26/18870	0.0283013	0.0923809	CXCL8/KDR/VEGFA	3
BP	GO:0051894	positive regulation of focal adhesion assembly	3/485	26/18870	0.0283013	0.0923809	KDR/SDC4/VEGFA	3
BP	GO:0060391	positive regulation of SMAD protein signal transduction	3/485	26/18870	0.0283013	0.0923809	BMP4/INHBA/BMP2	3
CC	GO:0072562	blood microparticle	8/497	144/19886	0.0284289	0.337445	BCHE/HP/C3/CFB/SERPING1/C4A/HSPA6/SERPINA3	8
BP	GO:0002312	B cell activation involved in immune response	6/485	90/18870	0.0284577	0.0926188	IL6/GPR183/BCL3/NFKBIZ/DOCK11/CLCF1	6
BP	GO:0007589	body fluid secretion	6/485	90/18870	0.0284577	0.0926188	FOSL2/AQP1/SOCS2/ATP7B/VAMP8/VEGFA	6
BP	GO:0046889	positive regulation of lipid biosynthetic process	6/485	90/18870	0.0284577	0.0926188	PTGS2/LDLR/IL1B/RDH10/PCK1/RAB38	6
MF	GO:0008138	protein tyrosine/serine/threonine phosphatase activity	4/489	44/18496	0.0284873	0.216489	DUSP5/DUSP2/DUSP1/DUSP6	4
BP	GO:0010611	regulation of cardiac muscle hypertrophy	5/485	67/18870	0.028851	0.0937158	NR4A3/RGS2/MIR21/LMCD1/MIR17	5
BP	GO:0060675	ureteric bud morphogenesis	5/485	67/18870	0.028851	0.0937158	MYC/BMP4/WNT2B/VEGFA/BMP2	5
MF	GO:0016922	nuclear receptor binding	8/489	137/18496	0.0292673	0.219737	NR4A3/ARID5A/NR4A1/NR4A2/RERG/ETS2/ASXL1/TRIM68	8
BP	GO:0001101	response to acid chemical	8/485	141/18870	0.0293992	0.0954032	SLC7A5/KCNB1/PDGFC/VEGFA/COL1A2/COL3A1/GCLM/PCK1	8
BP	GO:0042593	glucose homeostasis	12/485	251/18870	0.0295021	0.0956441	IL6/FOSL2/ICAM1/KCNB1/PCK2/RBP4/OAS1/SYBU/GCLM/PCK1/CEBPA/PDK4	12
CC	GO:1904090	peptidase inhibitor complex	2/497	11/19886	0.0295301	0.337445	SERPINE1/PLAU	2
BP	GO:0006984	ER-nucleus signaling pathway	4/485	46/18870	0.0300792	0.0971367	PPP1R15A/PPP1R15B/BOK/INSIG1	4
BP	GO:0085029	extracellular matrix assembly	4/485	46/18870	0.0300792	0.0971367	HAS2/HAS1/COL1A2/COL3A1	4
BP	GO:1902622	regulation of neutrophil migration	4/485	46/18870	0.0300792	0.0971367	DPP4/TNFAIP6/CXCL8/C5AR1	4
BP	GO:2001239	regulation of extrinsic apoptotic signaling pathway in absence of ligand	4/485	46/18870	0.0300792	0.0971367	MCL1/IL1B/INHBA/IL7	4
CC	GO:0009898	cytoplasmic side of plasma membrane	9/497	173/19886	0.0301685	0.337445	SOCS3/RGS2/RGS1/GEM/ALOX15/TRAF5/LDLRAP1/FADD/GNAI1	9
BP	GO:0019932	second-messenger-mediated signaling	14/485	310/18870	0.0301919	0.097406	SELE/THBS1/CXCL8/AQP1/SPHK1/RASD1/LMCD1/CX3CR1/KDR/GNAI1/CCL20/GPR3/ACKR4/VEGFA	14
BP	GO:0010001	glial cell differentiation	12/485	252/18870	0.0302883	0.097528	IL6/MYRF/LIF/EGR2/PHGDH/LDLR/IL1B/BOK/B4GALT5/CLCF1/C5AR1/BMP2	12
BP	GO:0033500	carbohydrate homeostasis	12/485	252/18870	0.0302883	0.097528	IL6/FOSL2/ICAM1/KCNB1/PCK2/RBP4/OAS1/SYBU/GCLM/PCK1/CEBPA/PDK4	12
MF	GO:0001848	complement binding	3/489	26/18496	0.0304217	0.22303	PTX3/CFB/C4A	3
MF	GO:0042974	nuclear retinoic acid receptor binding	3/489	26/18496	0.0304217	0.22303	ARID5A/NR4A2/ASXL1	3
BP	GO:0046513	ceramide biosynthetic process	5/485	68/18870	0.0305077	0.097587	ST3GAL5/SPHK1/SGMS2/UGCG/B4GALT5	5
BP	GO:0051055	negative regulation of lipid biosynthetic process	5/485	68/18870	0.0305077	0.097587	SIK1/SPHK1/INSIG1/NFKB1/BMP2	5
BP	GO:0150116	regulation of cell-substrate junction organization	5/485	68/18870	0.0305077	0.097587	THBS1/KDR/FAM107A/SDC4/VEGFA	5
BP	GO:2000379	positive regulation of reactive oxygen species metabolic process	5/485	68/18870	0.0305077	0.097587	CDKN1A/THBS1/GADD45A/CYP1B1/RAB27A	5
BP	GO:0048880	sensory system development	17/485	401/18870	0.0309116	0.097587	SLC25A25/C3/GPM6A/AQP1/KLF4/BCAR3/FJX1/BMP4/EPHA2/CYP1B1/KDR/RBP4/INHBA/RDH10/WNT2B/VEGFA/MAB21L2	17
CC	GO:0055037	recycling endosome	10/497	202/19886	0.0310208	0.337445	NSG1/CD274/RAB17/LDLRAP1/VAMP8/FZD7/MYO5B/BOK/ACKR1/ACKR4	10
BP	GO:0001660	fever generation	2/485	11/18870	0.0310979	0.097587	PTGS2/IL1B	2
BP	GO:0002158	osteoclast proliferation	2/485	11/18870	0.0310979	0.097587	JUNB/TNFAIP3	2
BP	GO:0003139	secondary heart field specification	2/485	11/18870	0.0310979	0.097587	LRP2/BMP4	2
BP	GO:0032253	dense core granule localization	2/485	11/18870	0.0310979	0.097587	SYT4/SYBU	2
BP	GO:0032754	positive regulation of interleukin-5 production	2/485	11/18870	0.0310979	0.097587	IL1RL1/IL1RAP	2
BP	GO:0034115	negative regulation of heterotypic cell-cell adhesion	2/485	11/18870	0.0310979	0.097587	IL1RN/KLF4	2
BP	GO:0034139	regulation of toll-like receptor 3 signaling pathway	2/485	11/18870	0.0310979	0.097587	TNFAIP3/PELI1	2
BP	GO:0034350	regulation of glial cell apoptotic process	2/485	11/18870	0.0310979	0.097587	CCL2/AKAP12	2
BP	GO:0046349	amino sugar biosynthetic process	2/485	11/18870	0.0310979	0.097587	UAP1/GNPNAT1	2
BP	GO:0051593	response to folic acid	2/485	11/18870	0.0310979	0.097587	BCHE/NFKBIZ	2
BP	GO:0060272	embryonic skeletal joint morphogenesis	2/485	11/18870	0.0310979	0.097587	BMP4/OSR1	2
BP	GO:0060601	lateral sprouting from an epithelium	2/485	11/18870	0.0310979	0.097587	SULF1/BMP4	2
BP	GO:0070587	regulation of cell-cell adhesion involved in gastrulation	2/485	11/18870	0.0310979	0.097587	IL1RN/KLF4	2
BP	GO:0070673	response to interleukin-18	2/485	11/18870	0.0310979	0.097587	IL18/CLDN1	2
BP	GO:0071476	cellular hypotonic response	2/485	11/18870	0.0310979	0.097587	FBP1/PCK1	2
BP	GO:0072124	regulation of glomerular mesangial cell proliferation	2/485	11/18870	0.0310979	0.097587	EGR1/BMP4	2
BP	GO:0072178	nephric duct morphogenesis	2/485	11/18870	0.0310979	0.097587	BMP4/OSR1	2
BP	GO:0097278	complement-dependent cytotoxicity	2/485	11/18870	0.0310979	0.097587	C3/RAB27A	2
BP	GO:0099519	dense core granule cytoskeletal transport	2/485	11/18870	0.0310979	0.097587	SYT4/SYBU	2
BP	GO:1901950	dense core granule transport	2/485	11/18870	0.0310979	0.097587	SYT4/SYBU	2
BP	GO:1905165	regulation of lysosomal protein catabolic process	2/485	11/18870	0.0310979	0.097587	LRP2/LDLR	2
BP	GO:2000726	negative regulation of cardiac muscle cell differentiation	2/485	11/18870	0.0310979	0.097587	FZD7/BMP2	2
BP	GO:0006972	hyperosmotic response	3/485	27/18870	0.0312475	0.0975965	AQP1/FBP1/PCK1	3
BP	GO:0035458	cellular response to interferon-beta	3/485	27/18870	0.0312475	0.0975965	IRF1/TRIM6/OAS1	3
BP	GO:0045742	positive regulation of epidermal growth factor receptor signaling pathway	3/485	27/18870	0.0312475	0.0975965	BCAR3/DGKD/PLAUR	3
BP	GO:0071480	cellular response to gamma radiation	3/485	27/18870	0.0312475	0.0975965	CDKN1A/EGR1/MIR21	3
BP	GO:0099560	synaptic membrane adhesion	3/485	27/18870	0.0312475	0.0975965	FLRT3/PTPRF/IL1RAP	3
BP	GO:0010952	positive regulation of peptidase activity	9/485	170/18870	0.031894	0.0995223	MYC/MIR21/FADD/DAPK1/EGLN3/SOX7/BOK/MIR17/PYCARD	9
BP	GO:0002711	positive regulation of T cell mediated immunity	5/485	69/18870	0.0322231	0.100202	IL6/ARID5A/IL18/IL1B/FADD	5
BP	GO:0045670	regulation of osteoclast differentiation	5/485	69/18870	0.0322231	0.100202	FOS/TNFAIP6/KLF10/UBASH3B/FSTL3	5
BP	GO:2000401	regulation of lymphocyte migration	5/485	69/18870	0.0322231	0.100202	CCL2/FADD/CCL7/CCL20/PYCARD	5
BP	GO:0035850	epithelial cell differentiation involved in kidney development	4/485	47/18870	0.0322323	0.100202	LIF/GPR4/OSR1/ASXL1	4
BP	GO:0043500	muscle adaptation	7/485	118/18870	0.0327265	0.101549	NR4A3/RGS2/MIR21/IL1B/LMCD1/HMOX1/MIR17	7
BP	GO:0050830	defense response to Gram-positive bacterium	7/485	118/18870	0.0327265	0.101549	IL6/IL18/IL1B/EPHA2/PLA2G2A/PYCARD/C5AR1	7
MF	GO:0000182	rDNA binding	2/489	11/18496	0.0327605	0.229382	BNC2/BNC1	2
MF	GO:0019911	structural constituent of myelin sheath	2/489	11/18496	0.0327605	0.229382	PLLP/MAL2	2
MF	GO:0048185	activin binding	2/489	11/18496	0.0327605	0.229382	FST/FSTL3	2
MF	GO:0048407	platelet-derived growth factor binding	2/489	11/18496	0.0327605	0.229382	COL1A2/COL3A1	2
BP	GO:0009266	response to temperature stimulus	9/485	171/18870	0.0329349	0.1021	CDKN1A/THBS1/PTGS2/CALCA/DNAJB1/IER5/METRNL/HMOX1/HSPA6	9
MF	GO:0005044	scavenger receptor activity	3/489	27/18496	0.033571	0.232445	PRG4/ACKR4/COLEC12	3
BP	GO:0046165	alcohol biosynthetic process	8/485	145/18870	0.0339054	0.104439	ITPKC/SPHK1/GCH1/PCK2/INSIG1/NFKB1/PCK1/BMP2	8
BP	GO:0061008	hepaticobiliary system development	8/485	145/18870	0.0339054	0.104439	IL6/SLC7A5/SOX17/TNFAIP3/CLDN1/PCK2/PCK1/CEBPA	8
BP	GO:0002752	cell surface pattern recognition receptor signaling pathway	5/485	70/18870	0.0339975	0.104439	TNFAIP3/OAS1/PELI1/TRIL/TLR5	5
BP	GO:0014743	regulation of muscle hypertrophy	5/485	70/18870	0.0339975	0.104439	NR4A3/RGS2/MIR21/LMCD1/MIR17	5
BP	GO:0050922	negative regulation of chemotaxis	5/485	70/18870	0.0339975	0.104439	CCL2/DPP4/THBS1/TNFAIP6/DUSP1	5
BP	GO:0071479	cellular response to ionizing radiation	5/485	70/18870	0.0339975	0.104439	CDKN1A/EGR1/SPIDR/MIR21/GADD45A	5
BP	GO:1990748	cellular detoxification	7/485	119/18870	0.0340358	0.104439	MIR21/HP/PIM1/PTGS2/PTGS1/GCH1/GPX8	7
BP	GO:0071229	cellular response to acid chemical	6/485	94/18870	0.0342125	0.104439	SLC7A5/PDGFC/VEGFA/COL1A2/COL3A1/GCLM	6
BP	GO:0003094	glomerular filtration	3/485	28/18870	0.034348	0.104439	AQP1/SULF1/RHPN2	3
BP	GO:0009648	photoperiodism	3/485	28/18870	0.034348	0.104439	SIK1/RBM4B/BHLHE40	3
BP	GO:0010758	regulation of macrophage chemotaxis	3/485	28/18870	0.034348	0.104439	THBS1/CSF1R/C5AR1	3
BP	GO:0010922	positive regulation of phosphatase activity	3/485	28/18870	0.034348	0.104439	PPP1R15A/PPP1R15B/BMP2	3
BP	GO:0015732	prostaglandin transport	3/485	28/18870	0.034348	0.104439	PTGS2/IL1B/SLCO4A1	3
BP	GO:0034698	response to gonadotropin	3/485	28/18870	0.034348	0.104439	CYP1B1/INHBA/GCLM	3
BP	GO:0044342	type B pancreatic cell proliferation	3/485	28/18870	0.034348	0.104439	NR4A3/NR4A1/SERPINB1	3
BP	GO:0060512	prostate gland morphogenesis	3/485	28/18870	0.034348	0.104439	CRIP1/SULF1/BMP4	3
BP	GO:0060964	regulation of miRNA-mediated gene silencing	3/485	28/18870	0.034348	0.104439	ZFP36/IL6/BMP4	3
BP	GO:1903671	negative regulation of sprouting angiogenesis	3/485	28/18870	0.034348	0.104439	ADAMTS9/THBS1/MIR17	3
BP	GO:1903672	positive regulation of sprouting angiogenesis	3/485	28/18870	0.034348	0.104439	KLF4/ITGA5/VEGFA	3
BP	GO:1903901	negative regulation of viral life cycle	3/485	28/18870	0.034348	0.104439	CH25H/PTX3/LY6E	3
BP	GO:0032964	collagen biosynthetic process	4/485	48/18870	0.0344734	0.104439	IL6/FOSL2/BMP4/INHBA	4
BP	GO:0045776	negative regulation of blood pressure	4/485	48/18870	0.0344734	0.104439	IER3/CALCA/GCH1/MIR17	4
BP	GO:0046189	phenol-containing compound biosynthetic process	4/485	48/18870	0.0344734	0.104439	NR4A2/GCH1/CDH3/RAB38	4
BP	GO:0140374	antiviral innate immune response	4/485	48/18870	0.0344734	0.104439	RNF135/TRIM6/IFIT1/OAS1	4
BP	GO:1903587	regulation of blood vessel endothelial cell proliferation involved in sprouting angiogenesis	4/485	48/18870	0.0344734	0.104439	MIR21/THBS1/HMOX1/VEGFA	4
BP	GO:0045936	negative regulation of phosphate metabolic process	16/485	376/18870	0.0345266	0.104505	CDKN1A/SOCS3/GPRC5A/RGS2/PPP1R15A/PPP1R15B/GADD45A/ERRFI1/IL1B/DUSP1/UBASH3B/INHBA/DUSP6/PYCARD/CEBPA/BMP2	16
BP	GO:0030900	forebrain development	17/485	407/18870	0.034846	0.105376	BTG2/NR4A2/LRP2/AQP1/DNAJB1/KDM6B/BMP4/MGARP/PGAP1/INHBA/ZSWIM6/WNT2B/ANXA3/CSF1R/COL3A1/ARL13B/BMP2	17
CC	GO:0005583	fibrillar collagen trimer	2/497	12/19886	0.0348592	0.337445	COL1A2/COL3A1	2
CC	GO:0098643	banded collagen fibril	2/497	12/19886	0.0348592	0.337445	COL1A2/COL3A1	2
CC	GO:0005942	phosphatidylinositol 3-kinase complex	3/497	29/19886	0.0350465	0.337445	SOCS3/CISH/SOCS2	3
CC	GO:0032585	multivesicular body membrane	3/497	29/19886	0.0350465	0.337445	RAB27B/NSG1/RAB27A	3
BP	GO:0002262	myeloid cell homeostasis	9/485	173/18870	0.0350867	0.106008	ZFP36/IL6/EPB42/BMP4/INHBA/HMOX1/PDE4B/VEGFA/ETS1	9
BP	GO:0071560	cellular response to transforming growth factor beta stimulus	13/485	287/18870	0.0351331	0.106051	MIR21/FOS/THBS1/JUN/NFKBIZ/HTRA1/CLDN1/CX3CR1/MIR17/COL1A2/COL3A1/LRG1/BMP2	13
BP	GO:0010563	negative regulation of phosphorus metabolic process	16/485	377/18870	0.0352413	0.106282	CDKN1A/SOCS3/GPRC5A/RGS2/PPP1R15A/PPP1R15B/GADD45A/ERRFI1/IL1B/DUSP1/UBASH3B/INHBA/DUSP6/PYCARD/CEBPA/BMP2	16
BP	GO:0007044	cell-substrate junction assembly	6/485	95/18870	0.0357602	0.107486	THBS1/ITGA5/KDR/FAM107A/SDC4/VEGFA	6
BP	GO:0045638	negative regulation of myeloid cell differentiation	6/485	95/18870	0.0357602	0.107486	ZFP36/MYC/TNFAIP6/UBASH3B/INHBA/FSTL3	6
BP	GO:0002429	immune response-activating cell surface receptor signaling pathway	14/485	318/18870	0.036243	0.107486	NR4A3/FOSL2/TNFAIP3/BLNK/NFKBIZ/BTN3A3/OAS1/BTN3A2/PDE4B/PELI1/TRIL/TLR5/NFKB1/C5AR1	14
BP	GO:0050728	negative regulation of inflammatory response	10/485	202/18870	0.0364304	0.107486	ZFP36/SOCS3/TNFAIP3/IER3/TNFAIP6/KLF4/LDLR/METRNL/NLRC3/NFKB1	10
BP	GO:0003157	endocardium development	2/485	12/18870	0.0366931	0.107486	SOX17/KDR	2
BP	GO:0003306	Wnt signaling pathway involved in heart development	2/485	12/18870	0.0366931	0.107486	SOX17/BMP2	2
BP	GO:0006482	protein demethylation	2/485	12/18870	0.0366931	0.107486	KDM7A/KDM6B	2
BP	GO:0008214	protein dealkylation	2/485	12/18870	0.0366931	0.107486	KDM7A/KDM6B	2
BP	GO:0010749	regulation of nitric oxide mediated signal transduction	2/485	12/18870	0.0366931	0.107486	THBS1/VEGFA	2
BP	GO:0015801	aromatic amino acid transport	2/485	12/18870	0.0366931	0.107486	SLC7A5/SLC16A10	2
BP	GO:0030656	regulation of vitamin metabolic process	2/485	12/18870	0.0366931	0.107486	RDH10/NFKB1	2
BP	GO:0031650	regulation of heat generation	2/485	12/18870	0.0366931	0.107486	PTGS2/IL1B	2
BP	GO:0032351	negative regulation of hormone metabolic process	2/485	12/18870	0.0366931	0.107486	NFKB1/BMP2	2
BP	GO:0033083	regulation of immature T cell proliferation	2/485	12/18870	0.0366931	0.107486	BMP4/IL1B	2
BP	GO:0033084	regulation of immature T cell proliferation in thymus	2/485	12/18870	0.0366931	0.107486	BMP4/IL1B	2
BP	GO:0033629	negative regulation of cell adhesion mediated by integrin	2/485	12/18870	0.0366931	0.107486	SERPINE1/CYP1B1	2
BP	GO:0036490	regulation of translation in response to endoplasmic reticulum stress	2/485	12/18870	0.0366931	0.107486	PPP1R15A/PPP1R15B	2
BP	GO:0042416	dopamine biosynthetic process	2/485	12/18870	0.0366931	0.107486	NR4A2/GCH1	2
BP	GO:0042487	regulation of odontogenesis of dentin-containing tooth	2/485	12/18870	0.0366931	0.107486	BMP4/BMP2	2
BP	GO:0043589	skin morphogenesis	2/485	12/18870	0.0366931	0.107486	ERRFI1/COL1A2	2
BP	GO:0045628	regulation of T-helper 2 cell differentiation	2/485	12/18870	0.0366931	0.107486	IL18/IL4R	2
BP	GO:0051549	positive regulation of keratinocyte migration	2/485	12/18870	0.0366931	0.107486	HBEGF/HAS2	2
BP	GO:0070561	vitamin D receptor signaling pathway	2/485	12/18870	0.0366931	0.107486	PIM1/MN1	2
BP	GO:0070586	cell-cell adhesion involved in gastrulation	2/485	12/18870	0.0366931	0.107486	IL1RN/KLF4	2
BP	GO:0071493	cellular response to UV-B	2/485	12/18870	0.0366931	0.107486	CDKN1A/CRIP1	2
BP	GO:0072110	glomerular mesangial cell proliferation	2/485	12/18870	0.0366931	0.107486	EGR1/BMP4	2
BP	GO:0072182	regulation of nephron tubule epithelial cell differentiation	2/485	12/18870	0.0366931	0.107486	LIF/OSR1	2
BP	GO:1901299	negative regulation of hydrogen peroxide-mediated programmed cell death	2/485	12/18870	0.0366931	0.107486	MIR21/MIR17	2
MF	GO:0051213	dioxygenase activity	6/489	93/18496	0.0367536	0.247138	PTGS2/ALOX15/PTGS1/KDM7A/KDM6B/EGLN3	6
BP	GO:0030278	regulation of ossification	7/485	121/18870	0.0367578	0.107486	EGR2/CALCA/SGMS2/BMP4/OSR1/CHSY1/BMP2	7
BP	GO:0051100	negative regulation of binding	7/485	121/18870	0.0367578	0.107486	CDKN1A/XIRP1/SLPI/PTPRF/JUN/IFIT1/DACT1	7
BP	GO:0051702	biological process involved in interaction with symbiont	7/485	121/18870	0.0367578	0.107486	PTX3/CHD1/JUN/FBXL2/CX3CR1/CCL8/CSF1R	7
BP	GO:0006911	phagocytosis, engulfment	4/485	49/18870	0.0368029	0.107486	C3/THBS1/ALOX15/MARCO	4
BP	GO:0010171	body morphogenesis	4/485	49/18870	0.0368029	0.107486	CSRNP1/CRISPLD2/TIPARP/MAB21L2	4
BP	GO:0036230	granulocyte activation	4/485	49/18870	0.0368029	0.107486	IL18/CXCL8/PLA2G2A/ANXA3	4
BP	GO:0061028	establishment of endothelial barrier	4/485	49/18870	0.0368029	0.107486	ICAM1/CLDN1/IL1B/VEGFA	4
BP	GO:0072337	modified amino acid transport	4/485	49/18870	0.0368029	0.107486	LRP2/SLC19A2/SLC7A7/SLC22A4	4
MF	GO:0045499	chemorepellent activity	3/489	28/18496	0.0368828	0.247138	FLRT3/DPP4/FLRT2	3
MF	GO:0051019	mitogen-activated protein kinase binding	3/489	28/18496	0.0368828	0.247138	DUSP2/GCH1/DUSP1	3
BP	GO:0070664	negative regulation of leukocyte proliferation	6/485	96/18870	0.0373522	0.108581	TNFAIP3/CD274/BMP4/PLA2G2A/PELI1/SDC4	6
BP	GO:0003401	axis elongation	3/485	29/18870	0.0376016	0.108581	AREG/BMP4/RDH10	3
BP	GO:0003416	endochondral bone growth	3/485	29/18870	0.0376016	0.108581	BNC2/FOSL2/STC1	3
BP	GO:0009264	deoxyribonucleotide catabolic process	3/485	29/18870	0.0376016	0.108581	PNP/TDG/UPP1	3
BP	GO:0010800	positive regulation of peptidyl-threonine phosphorylation	3/485	29/18870	0.0376016	0.108581	SPHK1/TRIM6/CEMIP	3
BP	GO:0032770	positive regulation of monooxygenase activity	3/485	29/18870	0.0376016	0.108581	GCH1/IL1B/CDH3	3
BP	GO:0046386	deoxyribose phosphate catabolic process	3/485	29/18870	0.0376016	0.108581	PNP/TDG/UPP1	3
BP	GO:0060603	mammary gland duct morphogenesis	3/485	29/18870	0.0376016	0.108581	AREG/EPHA2/CSF1R	3
BP	GO:0072207	metanephric epithelium development	3/485	29/18870	0.0376016	0.108581	LIF/AQP1/OSR1	3
BP	GO:0090025	regulation of monocyte chemotaxis	3/485	29/18870	0.0376016	0.108581	SERPINE1/CX3CR1/DUSP1	3
BP	GO:0097421	liver regeneration	3/485	29/18870	0.0376016	0.108581	IL6/SLC7A5/CLDN1	3
BP	GO:1900368	regulation of post-transcriptional gene silencing by regulatory ncRNA	3/485	29/18870	0.0376016	0.108581	ZFP36/IL6/BMP4	3
BP	GO:1901186	positive regulation of ERBB signaling pathway	3/485	29/18870	0.0376016	0.108581	BCAR3/DGKD/PLAUR	3
BP	GO:0043491	phosphatidylinositol 3-kinase/protein kinase B signal transduction	13/485	290/18870	0.0376943	0.108655	LRP2/IL18/HBEGF/MIR21/THBS1/FBXL2/CSF3/EPHA2/CX3CR1/KDR/NLRC3/PDGFC/CSF1R	13
BP	GO:0030858	positive regulation of epithelial cell differentiation	5/485	72/18870	0.0377251	0.108655	LIF/MIR21/SERPINE1/BMP4/BMP2	5
BP	GO:0042130	negative regulation of T cell proliferation	5/485	72/18870	0.0377251	0.108655	CD274/BMP4/PLA2G2A/PELI1/SDC4	5
BP	GO:0010948	negative regulation of cell cycle process	14/485	320/18870	0.0378831	0.109015	CDKN1A/CCL2/LIF/IER3/KLF4/BMP4/DUSP1/DCUN1D3/INHBA/FAM107A/RBBP8/ETAA1/DACT1/NABP1	14
BP	GO:0005996	monosaccharide metabolic process	12/485	261/18870	0.0380546	0.109414	SIK1/ATF3/SLC2A3/MST1/PCK2/NUDT5/RBP4/FBP1/OAS1/PFKFB3/PCK1/PDK4	12
BP	GO:0021782	glial cell development	7/485	122/18870	0.0381711	0.109655	IL6/MYRF/PHGDH/LDLR/IL1B/B4GALT5/C5AR1	7
BP	GO:0015711	organic anion transport	18/485	443/18870	0.0383859	0.110177	SLC7A5/SLC25A25/LRP2/SLC2A14/SLC2A3/RGS2/THBS1/SLC19A2/PTGS2/SYT4/IL1B/SLCO4A1/PLA2G2A/SLC7A7/SLC22A4/EMB/SLC16A6/SLC16A10	18
BP	GO:0046942	carboxylic acid transport	15/485	351/18870	0.0385779	0.110632	SLC7A5/LRP2/RGS2/THBS1/SLC19A2/PTGS2/SYT4/IL1B/SLCO4A1/PLA2G2A/SLC7A7/SLC22A4/EMB/SLC16A6/SLC16A10	15
MF	GO:0042301	phosphate ion binding	2/489	12/18496	0.0386363	0.250552	PNP/MTHFD2	2
MF	GO:0046790	virion binding	2/489	12/18496	0.0386363	0.250552	PTX3/ANXA9	2
MF	GO:0055056	D-glucose transmembrane transporter activity	2/489	12/18496	0.0386363	0.250552	SLC2A14/SLC2A3	2
BP	GO:0031348	negative regulation of defense response	14/485	321/18870	0.0387228	0.110952	ZFP36/SOCS3/MIR21/TNFAIP3/IER3/TNFAIP6/FBXL2/KLF4/LDLR/METRNL/OAS1/NLRC3/SERPING1/NFKB1	14
BP	GO:0050768	negative regulation of neurogenesis	8/485	149/18870	0.0388592	0.111247	IL6/BTG2/EFNB3/SYT4/LDLR/IL1B/CCL11/IFRD1	8
BP	GO:0050688	regulation of defense response to virus	6/485	97/18870	0.0389888	0.111427	TNFAIP3/FBXL2/IL1B/TRIM6/NLRC3/PYCARD	6
BP	GO:0051952	regulation of amine transport	6/485	97/18870	0.0389888	0.111427	SLC7A5/RGS2/SYT4/KCNB1/SYT17/ADORA3	6
MF	GO:0008194	UDP-glycosyltransferase activity	8/489	145/18496	0.0390005	0.250552	HAS2/B3GNT5/GALNT12/PIGA/CHSY1/UGCG/HAS1/B4GALT5	8
BP	GO:0044788	modulation by host of viral process	4/485	50/18870	0.0392208	0.111802	PTX3/FBXL2/CCL8/CSF1R	4
BP	GO:0061082	myeloid leukocyte cytokine production	4/485	50/18870	0.0392208	0.111802	NR4A3/DDX21/PANX1/PYCARD	4
BP	GO:1904752	regulation of vascular associated smooth muscle cell migration	4/485	50/18870	0.0392208	0.111802	NR4A3/MIR21/ADAMTS1/BMP4	4
BP	GO:0015849	organic acid transport	15/485	352/18870	0.0393881	0.112183	SLC7A5/LRP2/RGS2/THBS1/SLC19A2/PTGS2/SYT4/IL1B/SLCO4A1/PLA2G2A/SLC7A7/SLC22A4/EMB/SLC16A6/SLC16A10	15
BP	GO:0010811	positive regulation of cell-substrate adhesion	7/485	123/18870	0.0396196	0.112746	HAS2/ALOX15/ITGA5/KDR/CCDC80/SDC4/VEGFA	7
MF	GO:0016763	pentosyltransferase activity	4/489	49/18496	0.0401586	0.255358	PNP/NAMPT/TIPARP/UPP1	4
CC	GO:0045178	basal part of cell	13/497	301/19886	0.0401891	0.367849	SLC7A5/CA12/AQP1/RAB17/LDLR/CLDN1/ATP7B/LDLRAP1/SLC7A7/SLC22A4/SLC16A6/C5AR1/SLC16A10	13
BP	GO:0071559	response to transforming growth factor beta	13/485	293/18870	0.0403857	0.114828	MIR21/FOS/THBS1/JUN/NFKBIZ/HTRA1/CLDN1/CX3CR1/MIR17/COL1A2/COL3A1/LRG1/BMP2	13
BP	GO:0002275	myeloid cell activation involved in immune response	6/485	98/18870	0.0406704	0.11544	NR4A3/VAMP8/CX3CR1/IL4R/ANXA3/PYCARD	6
BP	GO:0006721	terpenoid metabolic process	6/485	98/18870	0.0406704	0.11544	LRP2/HSD17B6/CYP1B1/RBP4/RDH10/ADH1C	6
CC	GO:0005769	early endosome	17/497	427/19886	0.0409108	0.367849	HSD17B6/NSG1/CD274/SPHK1/ARC/RAB17/LDLR/LDLRAP1/VAMP8/KDR/SERPINB1/BOK/ACKR1/ARRDC4/ACKR4/STEAP4/RAB38	17
BP	GO:0007263	nitric oxide mediated signal transduction	3/485	30/18870	0.0410068	0.115509	THBS1/RASD1/VEGFA	3
BP	GO:0009649	entrainment of circadian clock	3/485	30/18870	0.0410068	0.115509	SIK1/RBM4B/BHLHE40	3
BP	GO:0010894	negative regulation of steroid biosynthetic process	3/485	30/18870	0.0410068	0.115509	INSIG1/NFKB1/BMP2	3
BP	GO:0010955	negative regulation of protein processing	3/485	30/18870	0.0410068	0.115509	THBS1/SERPINE1/PLAU	3
BP	GO:0060147	regulation of post-transcriptional gene silencing	3/485	30/18870	0.0410068	0.115509	ZFP36/IL6/BMP4	3
BP	GO:0060441	epithelial tube branching involved in lung morphogenesis	3/485	30/18870	0.0410068	0.115509	BMP4/RDH10/WNT2B	3
BP	GO:0097205	renal filtration	3/485	30/18870	0.0410068	0.115509	AQP1/SULF1/RHPN2	3
BP	GO:1900101	regulation of endoplasmic reticulum unfolded protein response	3/485	30/18870	0.0410068	0.115509	PPP1R15A/PPP1R15B/BOK	3
BP	GO:1903318	negative regulation of protein maturation	3/485	30/18870	0.0410068	0.115509	THBS1/SERPINE1/PLAU	3
BP	GO:0002705	positive regulation of leukocyte mediated immunity	8/485	151/18870	0.0415086	0.116724	IL6/ARID5A/IL18/C3/IL1B/FADD/DDX21/CLCF1	8
BP	GO:0071322	cellular response to carbohydrate stimulus	8/485	151/18870	0.0415086	0.116724	ICAM1/KCNB1/PCK2/FBP1/SYBU/GCLM/PCK1/COLEC12	8
CC	GO:0005640	nuclear outer membrane	3/497	31/19886	0.0415752	0.367849	ITPRIP/PTGS2/BOK	3
BP	GO:0045123	cellular extravasation	5/485	74/18870	0.0416935	0.117043	SELE/CCL2/ICAM1/CX3CR1/FADD	5
BP	GO:0043407	negative regulation of MAP kinase activity	4/485	51/18870	0.0417273	0.117043	RGS2/IL1B/DUSP1/BMP2	4
BP	GO:0045581	negative regulation of T cell differentiation	4/485	51/18870	0.0417273	0.117043	MIR21/IRF1/BMP4/IL4R	4
MF	GO:0016779	nucleotidyltransferase activity	8/489	147/18496	0.0417351	0.258513	TIPARP/PRIM1/POLI/UAP1/NUDT5/MB21D2/OAS1/POLR1C	8
MF	GO:0140375	immune receptor activity	8/489	147/18496	0.0417351	0.258513	IL1RL1/CX3CR1/IL4R/IL15RA/ACKR4/OSMR/IL1RAP/C5AR1	8
MF	GO:0004725	protein tyrosine phosphatase activity	6/489	96/18496	0.0418992	0.258513	DUSP5/DUSP2/PTPRF/DUSP1/UBASH3B/DUSP6	6
BP	GO:0009267	cellular response to starvation	9/485	179/18870	0.0421172	0.117331	CDKN1A/ATF3/SLC7A5/FOS/KLF10/UPP1/WNT2B/PCK1/PDK4	9
BP	GO:0001558	regulation of cell growth	17/485	417/18870	0.0422017	0.117331	CDKN1A/HBEGF/SOX17/RGS2/SPHK1/SYT4/SGK1/CISH/RERG/SOCS2/SYT17/DCUN1D3/FBP1/INHBA/FAM107A/VEGFA/IFRD1	17
BP	GO:0098869	cellular oxidant detoxification	6/485	99/18870	0.0423971	0.117331	MIR21/HP/PTGS2/PTGS1/GCH1/GPX8	6
BP	GO:0001952	regulation of cell-matrix adhesion	7/485	125/18870	0.0426232	0.117331	THBS1/SERPINE1/KDR/FAM107A/PLAU/SDC4/VEGFA	7
BP	GO:0006805	xenobiotic metabolic process	7/485	125/18870	0.0426232	0.117331	BCHE/AADAC/SLC28A3/AOX1/GSTA4/CYP1B1/FMO1	7
BP	GO:0006521	regulation of cellular amino acid metabolic process	2/485	13/18870	0.0426405	0.117331	MIR21/SLC7A7	2
BP	GO:0006971	hypotonic response	2/485	13/18870	0.0426405	0.117331	FBP1/PCK1	2
BP	GO:0007175	negative regulation of epidermal growth factor-activated receptor activity	2/485	13/18870	0.0426405	0.117331	GPRC5A/ERRFI1	2
BP	GO:0010992	ubiquitin recycling	2/485	13/18870	0.0426405	0.117331	RNF135/TRIM6	2
BP	GO:0014061	regulation of norepinephrine secretion	2/485	13/18870	0.0426405	0.117331	KCNB1/ADORA3	2
BP	GO:0021978	telencephalon regionalization	2/485	13/18870	0.0426405	0.117331	BMP4/BMP2	2
BP	GO:0031392	regulation of prostaglandin biosynthetic process	2/485	13/18870	0.0426405	0.117331	PTGS2/IL1B	2
BP	GO:0032494	response to peptidoglycan	2/485	13/18870	0.0426405	0.117331	IL6/C5AR1	2
BP	GO:0033079	immature T cell proliferation	2/485	13/18870	0.0426405	0.117331	BMP4/IL1B	2
BP	GO:0033080	immature T cell proliferation in thymus	2/485	13/18870	0.0426405	0.117331	BMP4/IL1B	2
BP	GO:0036302	atrioventricular canal development	2/485	13/18870	0.0426405	0.117331	HAS2/BMP2	2
BP	GO:0044406	adhesion of symbiont to host	2/485	13/18870	0.0426405	0.117331	DPP4/ICAM1	2
BP	GO:0045956	positive regulation of calcium ion-dependent exocytosis	2/485	13/18870	0.0426405	0.117331	SYT4/KCNB1	2
BP	GO:0048243	norepinephrine secretion	2/485	13/18870	0.0426405	0.117331	KCNB1/ADORA3	2
BP	GO:1900226	negative regulation of NLRP3 inflammasome complex assembly	2/485	13/18870	0.0426405	0.117331	FBXL2/NLRC3	2
BP	GO:1900272	negative regulation of long-term synaptic potentiation	2/485	13/18870	0.0426405	0.117331	CX3CR1/FAM107A	2
BP	GO:1902947	regulation of tau-protein kinase activity	2/485	13/18870	0.0426405	0.117331	EGR1/C5AR1	2
BP	GO:1904350	regulation of protein catabolic process in the vacuole	2/485	13/18870	0.0426405	0.117331	LRP2/LDLR	2
BP	GO:0031589	cell-substrate adhesion	15/485	356/18870	0.042751	0.117538	MSLN/HAS2/ADAMTS9/THBS1/SERPINE1/ALOX15/ITGA5/FZD7/KDR/CCDC80/FAM107A/PLAU/SDC4/VEGFA/COL3A1	15
BP	GO:0001707	mesoderm formation	5/485	75/18870	0.0437687	0.120138	KLF4/KDM6B/BMP4/EPHA2/INHBA	5
BP	GO:0010822	positive regulation of mitochondrion organization	5/485	75/18870	0.0437687	0.120138	PLAUR/MGARP/KDR/BOK/PYCARD	5
BP	GO:0019217	regulation of fatty acid metabolic process	6/485	100/18870	0.0441692	0.120233	NR4A3/PTGS2/IL1B/INSIG1/FMO1/PDK4	6
BP	GO:0043200	response to amino acid	7/485	126/18870	0.0441787	0.120233	SLC7A5/KCNB1/PDGFC/COL1A2/COL3A1/GCLM/PCK1	7
BP	GO:2000027	regulation of animal organ morphogenesis	7/485	126/18870	0.0441787	0.120233	SULF1/BMP4/FZD7/DACT1/WNT2B/VEGFA/BMP2	7
BP	GO:0006636	unsaturated fatty acid biosynthetic process	4/485	52/18870	0.0443225	0.120233	PTGS2/ALOX15/PTGS1/IL1B	4
BP	GO:0030838	positive regulation of actin filament polymerization	4/485	52/18870	0.0443225	0.120233	ALOX15/CSF3/CCL11/PYCARD	4
BP	GO:0051180	vitamin transport	4/485	52/18870	0.0443225	0.120233	LRP2/SLC2A14/SLC2A3/SLC19A2	4
BP	GO:0060688	regulation of morphogenesis of a branching structure	4/485	52/18870	0.0443225	0.120233	SULF1/BMP4/WNT2B/VEGFA	4
BP	GO:0099172	presynapse organization	4/485	52/18870	0.0443225	0.120233	EFNB3/CBLN2/IL1RAP/C5AR1	4
BP	GO:1904738	vascular associated smooth muscle cell migration	4/485	52/18870	0.0443225	0.120233	NR4A3/MIR21/ADAMTS1/BMP4	4
BP	GO:0001562	response to protozoan	3/485	31/18870	0.0445619	0.120233	IER3/BCL3/IL4R	3
BP	GO:0001945	lymph vessel development	3/485	31/18870	0.0445619	0.120233	EPHA2/KDR/VEGFA	3
BP	GO:0001975	response to amphetamine	3/485	31/18870	0.0445619	0.120233	NR4A1/NR4A2/RGS2	3
BP	GO:0006506	GPI anchor biosynthetic process	3/485	31/18870	0.0445619	0.120233	PIGV/PIGA/PGAP1	3
BP	GO:0034121	regulation of toll-like receptor signaling pathway	3/485	31/18870	0.0445619	0.120233	IRF1/BIRC3/MIR17	3
BP	GO:0034311	diol metabolic process	3/485	31/18870	0.0445619	0.120233	LRP2/SPHK1/GCH1	3
BP	GO:0050999	regulation of nitric-oxide synthase activity	3/485	31/18870	0.0445619	0.120233	GCH1/IL1B/GLA	3
BP	GO:0060325	face morphogenesis	3/485	31/18870	0.0445619	0.120233	CSRNP1/CRISPLD2/TIPARP	3
BP	GO:0060674	placenta blood vessel development	3/485	31/18870	0.0445619	0.120233	SOCS3/JUNB/FOSL1	3
BP	GO:0060966	regulation of gene silencing by regulatory ncRNA	3/485	31/18870	0.0445619	0.120233	ZFP36/IL6/BMP4	3
BP	GO:0150117	positive regulation of cell-substrate junction organization	3/485	31/18870	0.0445619	0.120233	KDR/SDC4/VEGFA	3
BP	GO:1900017	positive regulation of cytokine production involved in inflammatory response	3/485	31/18870	0.0445619	0.120233	IL6/MIR21/MIR17	3
BP	GO:0071478	cellular response to radiation	9/485	181/18870	0.0446573	0.120393	CDKN1A/MYC/EGR1/SPIDR/MIR21/AQP1/CRIP1/DDB2/GADD45A	9
MF	GO:0005172	vascular endothelial growth factor receptor binding	2/489	13/18496	0.0448773	0.268901	ITGA5/VEGFA	2
MF	GO:0017081	chloride channel regulator activity	2/489	13/18496	0.0448773	0.268901	SGK1/VAMP8	2
MF	GO:0039706	co-receptor binding	2/489	13/18496	0.0448773	0.268901	BMP4/BMP2	2
BP	GO:0046474	glycerophospholipid biosynthetic process	10/485	210/18870	0.0454142	0.122334	SOCS3/ITPKC/ALOX15/CISH/PIGV/SOCS2/PIGA/DGKD/PGAP1/RAB38	10
BP	GO:0007160	cell-matrix adhesion	11/485	239/18870	0.0454561	0.122348	MSLN/ADAMTS9/THBS1/SERPINE1/ITGA5/KDR/FAM107A/PLAU/SDC4/VEGFA/COL3A1	11
MF	GO:0005080	protein kinase C binding	4/489	51/18496	0.0454826	0.269932	NELL2/TDG/DACT1/SDC4	4
BP	GO:0051099	positive regulation of binding	7/485	127/18870	0.0457704	0.122995	CSF3/BMP4/PLAUR/TRIM6/DACT1/GMNN/BMP2	7
BP	GO:1903305	regulation of regulated secretory pathway	7/485	127/18870	0.0457704	0.122995	RAB15/SYT4/KCNB1/SYT17/VAMP8/IL4R/RAB27A	7
BP	GO:0048568	embryonic organ development	18/485	453/18870	0.0459454	0.123366	SOCS3/JUNB/KRT19/LIF/SOX17/CXCL8/HOXB2/BMP4/EPHA2/OSR1/KDR/RBP4/TEAD4/INSIG1/RDH10/VEGFA/ARL13B/CEBPA	18
BP	GO:0032755	positive regulation of interleukin-6 production	6/485	101/18870	0.0459871	0.123378	IL6/ARID5A/IL1B/EREG/PYCARD/IL1RAP	6
BP	GO:0001654	eye development	16/485	391/18870	0.04641	0.124413	SLC25A25/GPM6A/AQP1/KLF4/BCAR3/FJX1/BMP4/EPHA2/CYP1B1/KDR/RBP4/INHBA/RDH10/WNT2B/VEGFA/MAB21L2	16
CC	GO:0098845	postsynaptic endosome	2/497	14/19886	0.046516	0.400734	NSG1/ARC	2
BP	GO:0044818	mitotic G2/M transition checkpoint	4/485	53/18870	0.0470061	0.12591	CDKN1A/IER3/RBBP8/NABP1	4
BP	GO:0051961	negative regulation of nervous system development	8/485	155/18870	0.0471607	0.126222	IL6/BTG2/EFNB3/SYT4/LDLR/IL1B/CCL11/IFRD1	8
BP	GO:0031623	receptor internalization	7/485	128/18870	0.0473984	0.126366	SELE/CXCL8/WDR54/ARC/RSPO1/LDLRAP1/VEGFA	7
BP	GO:0097237	cellular response to toxic substance	7/485	128/18870	0.0473984	0.126366	MIR21/HP/PIM1/PTGS2/PTGS1/GCH1/GPX8	7
MF	GO:0071813	lipoprotein particle binding	3/489	31/18496	0.047776	0.278243	THBS1/LDLR/COLEC12	3
MF	GO:0071814	protein-lipid complex binding	3/489	31/18496	0.047776	0.278243	THBS1/LDLR/COLEC12	3
BP	GO:0150115	cell-substrate junction organization	6/485	102/18870	0.0478508	0.126366	THBS1/ITGA5/KDR/FAM107A/SDC4/VEGFA	6
BP	GO:0001937	negative regulation of endothelial cell proliferation	5/485	77/18870	0.048102	0.126366	CCL2/MIR21/THBS1/MIR22/SULF1	5
BP	GO:0032890	regulation of organic acid transport	5/485	77/18870	0.048102	0.126366	SLC7A5/RGS2/THBS1/SYT4/IL1B	5
BP	GO:0048332	mesoderm morphogenesis	5/485	77/18870	0.048102	0.126366	KLF4/KDM6B/BMP4/EPHA2/INHBA	5
BP	GO:0001516	prostaglandin biosynthetic process	3/485	32/18870	0.048265	0.126366	PTGS2/PTGS1/IL1B	3
BP	GO:0002360	T cell lineage commitment	3/485	32/18870	0.048265	0.126366	SOCS3/IL6/IL7	3
BP	GO:0006505	GPI anchor metabolic process	3/485	32/18870	0.048265	0.126366	PIGV/PIGA/PGAP1	3
BP	GO:0010464	regulation of mesenchymal cell proliferation	3/485	32/18870	0.048265	0.126366	MYC/BMP4/KDR	3
BP	GO:0032367	intracellular cholesterol transport	3/485	32/18870	0.048265	0.126366	LDLR/LDLRAP1/MIR17	3
BP	GO:0034391	regulation of smooth muscle cell apoptotic process	3/485	32/18870	0.048265	0.126366	SLC7A5/MIR21/MIR17	3
BP	GO:0046457	prostanoid biosynthetic process	3/485	32/18870	0.048265	0.126366	PTGS2/PTGS1/IL1B	3
BP	GO:0046685	response to arsenic-containing substance	3/485	32/18870	0.048265	0.126366	CDKN1A/CYP1B1/HMOX1	3
BP	GO:0098868	bone growth	3/485	32/18870	0.048265	0.126366	BNC2/FOSL2/STC1	3
BP	GO:1901889	negative regulation of cell junction assembly	3/485	32/18870	0.048265	0.126366	THBS1/IL1B/FAM107A	3
MF	GO:0048029	monosaccharide binding	5/489	75/18496	0.0483671	0.278815	SLC2A3/FBP1/EGLN3/GNPNAT1/COLEC12	5
BP	GO:1905039	carboxylic acid transmembrane transport	8/485	156/18870	0.0486484	0.126366	SLC7A5/LRP2/RGS2/THBS1/SLC7A7/SLC22A4/EMB/SLC16A10	8
MF	GO:1901981	phosphatidylinositol phosphate binding	9/489	179/18496	0.0487691	0.278815	ANXA8/ALOX15/GOLPH3L/LDLRAP1/FZD7/ADAP2/CAPG/ANXA9/PHLDA1	9
BP	GO:0002467	germinal center formation	2/485	14/18870	0.0489185	0.126366	TNFAIP3/BCL3	2
BP	GO:0006000	fructose metabolic process	2/485	14/18870	0.0489185	0.126366	FBP1/PFKFB3	2
BP	GO:0006047	UDP-N-acetylglucosamine metabolic process	2/485	14/18870	0.0489185	0.126366	UAP1/GNPNAT1	2
BP	GO:0009158	ribonucleoside monophosphate catabolic process	2/485	14/18870	0.0489185	0.126366	PNP/UPP1	2
BP	GO:0009159	deoxyribonucleoside monophosphate catabolic process	2/485	14/18870	0.0489185	0.126366	PNP/UPP1	2
BP	GO:0009404	toxin metabolic process	2/485	14/18870	0.0489185	0.126366	CYP1B1/FMO1	2
BP	GO:0010225	response to UV-C	2/485	14/18870	0.0489185	0.126366	BCL3/DCUN1D3	2
BP	GO:0015803	branched-chain amino acid transport	2/485	14/18870	0.0489185	0.126366	SLC7A5/SLC7A7	2
BP	GO:0032252	secretory granule localization	2/485	14/18870	0.0489185	0.126366	SYT4/SYBU	2
BP	GO:0032736	positive regulation of interleukin-13 production	2/485	14/18870	0.0489185	0.126366	IL18/IL1RAP	2
BP	GO:0042541	hemoglobin biosynthetic process	2/485	14/18870	0.0489185	0.126366	KLF4/INHBA	2
BP	GO:0042762	regulation of sulfur metabolic process	2/485	14/18870	0.0489185	0.126366	MIR21/PDK4	2
BP	GO:0043558	regulation of translational initiation in response to stress	2/485	14/18870	0.0489185	0.126366	PPP1R15A/PPP1R15B	2
BP	GO:0050930	induction of positive chemotaxis	2/485	14/18870	0.0489185	0.126366	CXCL8/VEGFA	2
BP	GO:0051547	regulation of keratinocyte migration	2/485	14/18870	0.0489185	0.126366	HBEGF/HAS2	2
BP	GO:0061043	regulation of vascular wound healing	2/485	14/18870	0.0489185	0.126366	TNFAIP3/SERPINE1	2
BP	GO:0061469	regulation of type B pancreatic cell proliferation	2/485	14/18870	0.0489185	0.126366	NR4A3/NR4A1	2
BP	GO:0072075	metanephric mesenchyme development	2/485	14/18870	0.0489185	0.126366	MYC/OSR1	2
BP	GO:0072160	nephron tubule epithelial cell differentiation	2/485	14/18870	0.0489185	0.126366	LIF/OSR1	2
BP	GO:0098814	spontaneous synaptic transmission	2/485	14/18870	0.0489185	0.126366	CBLN2/NSG1	2
BP	GO:0098883	synapse pruning	2/485	14/18870	0.0489185	0.126366	C3/CX3CR1	2
BP	GO:1900452	regulation of long-term synaptic depression	2/485	14/18870	0.0489185	0.126366	KCNB1/ARC	2
BP	GO:1901029	negative regulation of mitochondrial outer membrane permeabilization involved in apoptotic signaling pathway	2/485	14/18870	0.0489185	0.126366	IER3/BOK	2
BP	GO:1901031	regulation of response to reactive oxygen species	2/485	14/18870	0.0489185	0.126366	MIR21/GCH1	2
BP	GO:1901298	regulation of hydrogen peroxide-mediated programmed cell death	2/485	14/18870	0.0489185	0.126366	MIR21/MIR17	2
BP	GO:1902043	positive regulation of extrinsic apoptotic signaling pathway via death domain receptors	2/485	14/18870	0.0489185	0.126366	ATF3/THBS1	2
BP	GO:1905208	negative regulation of cardiocyte differentiation	2/485	14/18870	0.0489185	0.126366	FZD7/BMP2	2
BP	GO:0050769	positive regulation of neurogenesis	11/485	242/18870	0.0489223	0.126366	IL6/MYRF/SLC7A5/LRP2/LIF/EGR2/IL1B/CX3CR1/CLCF1/VEGFA/BMP2	11
BP	GO:0002708	positive regulation of lymphocyte mediated immunity	7/485	129/18870	0.0490629	0.126533	IL6/ARID5A/IL18/C3/IL1B/FADD/CLCF1	7
BP	GO:2001056	positive regulation of cysteine-type endopeptidase activity	7/485	129/18870	0.0490629	0.126533	MYC/FADD/DAPK1/EGLN3/SOX7/BOK/PYCARD	7
CC	GO:0016323	basolateral plasma membrane	11/497	249/19886	0.0491614	0.412131	SLC7A5/CA12/AQP1/RAB17/LDLR/CLDN1/ATP7B/SLC7A7/SLC16A6/C5AR1/SLC16A10	11
BP	GO:0050804	modulation of chemical synaptic transmission	19/485	489/18870	0.0494447	0.127419	EFNB3/CCL2/CBLN2/BCHE/EGR2/NSG1/PTGS2/SYT4/KCNB1/CALB2/ARC/IL1B/NMU/CX3CR1/CA2/FAM107A/SYBU/AKAP12/ADORA3	19
BP	GO:0022600	digestive system process	6/485	103/18870	0.0497605	0.12798	AQP1/SGK1/LDLR/UGCG/RBP4/SERPINA3	6
BP	GO:0002639	positive regulation of immunoglobulin production	4/485	54/18870	0.049778	0.12798	IL6/IL4R/RBP4/CLCF1	4
BP	GO:0060425	lung morphogenesis	4/485	54/18870	0.049778	0.12798	LIF/BMP4/RDH10/WNT2B	4

## Sheet: GSE4386_S_kegg_result
category	subcategory	ID	Description	GeneRatio	BgRatio	pvalue	qvalue	geneID	Count
Environmental Information Processing	Signal transduction	hsa04668	TNF signaling pathway	24/261	119/8844	4.75946e-14	1.01702e-11	9021/3569/6401/3726/6347/3976/2920/3383/2353/7128/2919/3659/3725/602/5743/2921/7188/330/9586/3553/8772/6364/197259/4790	24
Organismal Systems	Immune system	hsa04657	IL-17 signaling pathway	20/261	95/8844	2.87307e-12	3.06965e-10	3569/2354/6347/8061/2920/2353/7128/2919/3725/3576/5743/2921/1440/7188/3553/8772/6356/6354/6364/4790	20
Environmental Information Processing	Signaling molecules and interaction	hsa04060	Cytokine-cytokine receptor interaction	33/261	298/8844	3.70444e-11	2.6386e-09	3569/6347/3976/3606/2920/8793/3557/2919/51330/3576/2921/1440/9173/84957/943/652/3553/1524/3566/6356/3624/6355/6354/6364/8795/23529/3601/51554/1436/3574/9180/3556/650	33
Environmental Information Processing	Signal transduction	hsa04064	NF-kappa B signaling pathway	17/261	105/8844	9.29362e-09	4.96475e-07	4616/2920/3383/7128/2919/29760/3576/5743/2921/7188/10912/1647/330/3553/5328/597/4790	17
Environmental Information Processing	Signaling molecules and interaction	hsa04061	Viral protein interaction with cytokine and cytokine receptor	16/261	100/8844	3.0567e-08	1.30634e-06	3569/6347/3606/2920/8793/2919/3576/2921/1524/6356/6355/6354/6364/8795/51554/1436	16
Human Diseases	Infectious disease: bacterial	hsa05133	Pertussis	14/261	78/8844	5.07764e-08	1.80835e-06	3569/2353/718/3659/3725/3576/3678/717/3553/2770/710/720/4790/29108	14
Human Diseases	Infectious disease: bacterial	hsa05134	Legionellosis	12/261	56/8844	5.96229e-08	1.82007e-06	3569/3606/2920/2919/718/3576/2921/3553/7100/4790/29108/3310	12
Human Diseases	Endocrine and metabolic disease	hsa04933	AGE-RAGE signaling pathway in diabetic complications	15/261	101/8844	2.30312e-07	5.81684e-06	3569/6401/1958/6347/3383/5292/3725/3576/7056/5054/3553/7422/4790/1278/1281	15
Organismal Systems	Immune system	hsa04610	Complement and coagulation cascades	14/261	88/8844	2.44995e-07	5.81684e-06	718/7056/5054/10544/717/629/5329/3426/2153/5328/710/720/5055/728	14
Human Diseases	Infectious disease: parasitic	hsa05144	Malaria	10/261	50/8844	1.52949e-06	3.26828e-05	3569/6401/6347/3606/3383/7057/3576/1440/3553/2532	10
Human Diseases	Immune disease	hsa05323	Rheumatoid arthritis	13/261	94/8844	3.41127e-06	6.62667e-05	3569/6347/3606/2920/3383/2353/2919/3725/3576/2921/3553/6364/7422	13
Organismal Systems	Immune system	hsa04621	NOD-like receptor signaling pathway	18/261	189/8844	1.11649e-05	0.000198814	3569/6347/3606/2920/7128/2919/3725/3576/10135/2921/7188/330/3553/8772/24145/4938/4790/29108	18
Human Diseases	Cancer: overview	hsa05202	Transcriptional misregulation in cancer	18/261	193/8844	1.49053e-05	0.000245001	1026/3569/8013/4616/4609/3576/5966/64332/1643/10912/1647/330/1848/5328/597/4790/1436/1050	18
Human Diseases	Cardiovascular disease	hsa05418	Fluid shear stress and atherosclerosis	15/261	141/8844	1.64674e-05	0.000251345	6401/6347/3383/2353/3725/7056/2941/652/3553/3791/1843/3162/6385/7422/4790	15
Environmental Information Processing	Signal transduction	hsa04630	JAK-STAT signaling pathway	16/261	168/8844	3.46203e-05	0.000493187	1026/9021/3569/4609/3976/5292/1440/1154/4170/8835/316/3566/23529/3601/3574/9180	16
Environmental Information Processing	Signal transduction	hsa04151	PI3K-Akt signaling pathway	25/261	362/8844	6.37408e-05	0.000851275	1026/3569/4609/3164/57121/374/7057/1440/3678/6446/4170/9586/5106/1969/3791/3566/2069/56034/7422/4790/1436/1278/3574/9180/5105	25
Environmental Information Processing	Signal transduction	hsa04010	MAPK signaling pathway	22/261	300/8844	7.40068e-05	0.000930241	4616/4609/3164/1847/1844/374/2353/3725/10912/1647/3553/1969/3791/1843/1848/2069/56034/7422/4790/1436/3310/3556	22
Human Diseases	Cancer: specific types	hsa05222	Small cell lung cancer	11/261	93/8844	8.56543e-05	0.000975998	1026/4616/4609/5743/7188/1643/10912/1647/1164/330/4790	11
Human Diseases	Cancer: specific types	hsa05217	Basal cell carcinoma	9/261	63/8844	8.67821e-05	0.000975998	1026/4616/1643/10912/1647/652/8324/7482/650	9
Human Diseases	Infectious disease: viral	hsa05164	Influenza A	15/261	172/8844	0.000165399	0.00174218	9021/3569/6347/29107/3606/3383/3576/3337/3553/8772/4938/8795/4790/29108/3838	15
Human Diseases	Cancer: specific types	hsa05219	Bladder cancer	7/261	41/8844	0.000171215	0.00174218	1026/4609/1839/7057/3576/1612/7422	7
Human Diseases	Cardiovascular disease	hsa05417	Lipid and atherosclerosis	17/261	216/8844	0.000214747	0.00193228	3569/6401/6347/3606/2920/3383/2353/2919/3725/3576/2921/3949/3553/8795/4790/29108/3310	17
Human Diseases	Infectious disease: parasitic	hsa05142	Chagas disease	11/261	103/8844	0.000216044	0.00193228	3569/6347/2353/718/3725/3576/5054/3553/8772/2770/4790	11
Human Diseases	Infectious disease: viral	hsa05167	Kaposi sarcoma-associated herpesvirus infection	16/261	196/8844	0.000217024	0.00193228	7538/1026/3569/4609/2920/3383/2353/2919/718/3725/3576/5743/2921/8772/7422/4790	16
Human Diseases	Cancer: specific types	hsa05210	Colorectal cancer	10/261	87/8844	0.000228111	0.00194975	1026/4616/4609/374/2353/3725/1643/10912/1647/2069	10
Human Diseases	Endocrine and metabolic disease	hsa04936	Alcoholic liver disease	13/261	144/8844	0.000320744	0.00263608	3569/2920/2919/718/3576/2921/717/3553/8772/126/720/4790/728	13
Human Diseases	Cancer: specific types	hsa05216	Thyroid cancer	6/261	37/8844	0.000671633	0.00531546	1026/4616/4609/1643/10912/1647	6
Human Diseases	Infectious disease: bacterial	hsa05130	Pathogenic Escherichia coli infection	15/261	203/8844	0.000969725	0.00714534	3569/24146/3606/57121/2353/3725/3576/9076/3553/8772/4645/8795/7100/4790/29108	15
Human Diseases	Infectious disease: viral	hsa05169	Epstein-Barr virus infection	15/261	203/8844	0.000969725	0.00714534	1026/3569/4616/4609/3383/7128/29760/3725/7188/1643/10912/1647/8772/4938/4790	15
Organismal Systems	Immune system	hsa04625	C-type lectin receptor signaling pathway	10/261	105/8844	0.00103378	0.00736341	3569/1960/1959/3659/3725/602/5743/3553/4790/29108	10
Cellular Processes	Cell growth and death	hsa04115	p53 signaling pathway	8/261	75/8844	0.00157679	0.0108689	1026/4616/7057/5054/1643/10912/1647/8795	8
Organismal Systems	Digestive system	hsa04978	Mineral absorption	7/261	61/8844	0.00201228	0.0134373	4502/4499/645745/540/4496/4501/3162	7
Cellular Processes	Cell growth and death	hsa04210	Apoptosis	11/261	136/8844	0.00224245	0.0145205	4616/2353/3725/4170/10912/1647/330/8772/8795/597/4790	11
Human Diseases	Infectious disease: viral	hsa05166	Human T-cell leukemia virus 1 infection	15/261	223/8844	0.00246591	0.0154978	7538/1026/3569/4609/1958/8061/3383/2353/1959/3725/2114/9586/3601/2113/4790	15
Human Diseases	Infectious disease: bacterial	hsa05150	Staphylococcus aureus infection	9/261	100/8844	0.00270456	0.0165121	3880/3383/718/717/629/3426/3875/720/728	9
Human Diseases	Cancer: overview	hsa05205	Proteoglycans in cancer	14/261	204/8844	0.0028377	0.0167842	1026/4609/1839/406991/7057/3678/5329/8324/3791/7482/5328/6385/7422/1278	14
Human Diseases	Immune disease	hsa05321	Inflammatory bowel disease	7/261	65/8844	0.00290623	0.0167842	3569/3606/3725/3553/3566/7100/4790	7
Organismal Systems	Immune system	hsa04623	Cytosolic DNA-sensing pathway	8/261	83/8844	0.00301196	0.0168914	3569/3606/3553/8772/197259/4790/29108/9533	8
Organismal Systems	Development and regeneration	hsa04380	Osteoclast differentiation	11/261	142/8844	0.00314423	0.0168914	9021/2354/3726/8061/2355/2353/29760/3725/3553/4790/1436	11
Human Diseases	Infectious disease: viral	hsa05161	Hepatitis B	12/261	163/8844	0.00316195	0.0168914	1026/3569/4609/1960/2353/1959/3725/3576/1643/9586/8772/4790	12
Human Diseases	Infectious disease: parasitic	hsa05146	Amoebiasis	9/261	103/8844	0.00330588	0.0172296	3569/2920/2919/3576/2921/3553/4790/1278/1281	9
Human Diseases	Cancer: specific types	hsa05221	Acute myeloid leukemia	7/261	68/8844	0.0037556	0.0191074	4609/5292/1848/597/4790/1436/1050	7
Organismal Systems	Excretory system	hsa04964	Proximal tubule bicarbonate reclamation	4/261	23/8844	0.00421584	0.0209502	358/5106/760/5105	4
Human Diseases	Infectious disease: parasitic	hsa05143	African trypanosomiasis	5/261	37/8844	0.00433534	0.0210544	3569/6401/3606/3383/3553	5
Human Diseases	Infectious disease: viral	hsa05171	Coronavirus disease - COVID-19	15/261	238/8844	0.00455943	0.0216506	3569/6347/1839/2353/718/3725/3576/1440/717/629/3553/4938/720/4790/728	15
Human Diseases	Infectious disease: bacterial	hsa05120	Epithelial cell signaling in Helicobacter pylori infection	7/261	71/8844	0.00478158	0.0222119	1839/2920/2919/3725/3576/2921/4790	7
Cellular Processes	Transport and catabolism	hsa04148	Efferocytosis	11/261	156/8844	0.00639663	0.0290821	9023/1847/1844/7057/5743/246/8877/6446/64284/1524/24145	11
Organismal Systems	Endocrine system	hsa04928	Parathyroid hormone synthesis, secretion and action	9/261	115/8844	0.00682937	0.0304027	1026/1958/4929/1839/2353/6446/9586/2770/5142	9
Human Diseases	Infectious disease: bacterial	hsa05132	Salmonella infection	15/261	251/8844	0.00738073	0.0306427	3569/4609/3606/2353/3725/3576/113146/330/3553/8772/8795/197259/7100/4790/29108	15
Human Diseases	Cancer: specific types	hsa05212	Pancreatic cancer	7/261	77/8844	0.00745028	0.0306427	1026/4616/1643/10912/1647/7422/4790	7
Human Diseases	Cancer: specific types	hsa05220	Chronic myeloid leukemia	7/261	77/8844	0.00745028	0.0306427	1026/4616/4609/1643/10912/1647/4790	7
Human Diseases	Cancer: specific types	hsa05213	Endometrial cancer	6/261	59/8844	0.00758898	0.0306427	1026/4616/4609/1643/10912/1647	6
Human Diseases	Infectious disease: bacterial	hsa05135	Yersinia infection	10/261	138/8844	0.00760028	0.0306427	3569/6347/3606/2353/3725/3576/3678/3553/4790/29108	10
Organismal Systems	Immune system	hsa04062	Chemokine signaling pathway	12/261	193/8844	0.011809	0.0467295	6347/2920/2919/3576/2921/1524/2770/6356/6355/6354/6364/4790	12
Human Diseases	Cancer: specific types	hsa05224	Breast cancer	10/261	148/8844	0.0121327	0.0471376	1026/4616/4609/2353/3725/1643/10912/1647/8324/7482	10
Human Diseases	Substance dependence	hsa05030	Cocaine addiction	5/261	49/8844	0.0142542	0.0543912	2354/3725/9586/2770/4790	5
Environmental Information Processing	Signal transduction	hsa04066	HIF-1 signaling pathway	8/261	109/8844	0.0151086	0.0556631	1026/3569/5054/112399/3162/5209/7422/4790	8
Organismal Systems	Immune system	hsa04620	Toll-like receptor signaling pathway	8/261	109/8844	0.0151086	0.0556631	3569/2353/3725/3576/3553/8772/7100/4790	8
Human Diseases	Infectious disease: viral	hsa05163	Human cytomegalovirus infection	13/261	226/8844	0.0163621	0.0592598	1026/3569/4609/6347/3576/5743/7188/9586/3553/8772/2770/7422/4790	13
Cellular Processes	Cell growth and death	hsa04218	Cellular senescence	10/261	157/8844	0.0177371	0.0631453	1026/3569/4616/4609/3576/5054/10912/1647/2113/4790	10
Organismal Systems	Endocrine system	hsa04917	Prolactin signaling pathway	6/261	71/8844	0.018026	0.0631453	9021/2353/3659/1154/8835/4790	6
Human Diseases	Infectious disease: viral	hsa05160	Hepatitis C	10/261	159/8844	0.0192065	0.0661957	1026/9021/4609/24146/3949/9076/8772/3434/4938/4790	10
Human Diseases	Cancer: specific types	hsa05218	Melanoma	6/261	73/8844	0.0204148	0.0692431	1026/4616/1643/10912/1647/56034	6
Metabolism	Lipid metabolism	hsa00600	Sphingolipid metabolism	5/261	54/8844	0.0210055	0.0701333	8877/166929/7357/9334/2717	5
Human Diseases	Infectious disease: viral	hsa05162	Measles	9/261	139/8844	0.0217129	0.0713801	3569/2353/7128/3725/3553/8772/4938/4790/3310	9
Human Diseases	Infectious disease: parasitic	hsa05140	Leishmaniasis	6/261	77/8844	0.0258185	0.0835909	2353/718/3725/5743/3553/4790	6
Organismal Systems	Immune system	hsa04640	Hematopoietic cell lineage	7/261	99/8844	0.0268218	0.0855433	3569/1440/3678/3553/3566/1436/3574	7
Human Diseases	Cancer: specific types	hsa05225	Hepatocellular carcinoma	10/261	170/8844	0.0289257	0.0908964	1026/4616/4609/1643/10912/1647/2941/8324/3162/7482	10
Organismal Systems	Endocrine system	hsa04926	Relaxin signaling pathway	8/261	130/8844	0.0383404	0.118735	2353/3725/9586/2770/7422/4790/1278/1281	8
Metabolism	Glycan biosynthesis and metabolism	hsa00563	Glycosylphosphatidylinositol (GPI)-anchor biosynthesis	3/261	26/8844	0.0400519	0.119335	55650/5277/80055	3
Environmental Information Processing	Signal transduction	hsa04350	TGF-beta signaling pathway	7/261	108/8844	0.0403215	0.119335	4609/7057/652/7050/3624/10468/650	7
Organismal Systems	Immune system	hsa04659	Th17 cell differentiation	7/261	108/8844	0.0403215	0.119335	3569/2353/3725/3553/3566/4790/3556	7
Environmental Information Processing	Signal transduction	hsa04012	ErbB signaling pathway	6/261	86/8844	0.0412486	0.119335	1026/4609/1839/374/3725/2069	6
Human Diseases	Endocrine and metabolic disease	hsa04931	Insulin resistance	7/261	109/8844	0.0420518	0.119335	9021/3569/5792/9586/5106/4790/5105	7
Environmental Information Processing	Signal transduction	hsa04390	Hippo signaling pathway	9/261	157/8844	0.042693	0.119335	4609/374/5054/330/652/8324/7004/7482/650	9
Environmental Information Processing	Signal transduction	hsa04068	FoxO signaling pathway	8/261	133/8844	0.0429479	0.119335	1026/3569/4616/6446/10912/1647/5106/5105	8
Human Diseases	Cancer: overview	hsa05206	MicroRNAs in cancer	15/261	312/8844	0.0430016	0.119335	1026/4609/406991/5292/7057/5743/3678/4170/1545/406947/3162/5328/406952/7422/4790	15
Cellular Processes	Cell growth and death	hsa04217	Necroptosis	9/261	159/8844	0.0456537	0.12507	7128/246/7188/330/3553/8772/8795/197259/29108	9

## Sheet: GSE4386_S_GSEA_KEGG_result
ID	Description	setSize	enrichmentScore	NES	pvalue	p.adjust	qvalue	rank	leading_edge	core_enrichment
hsa04657	IL-17 signaling pathway	93	0.862868	2.35796	1e-10	1.16684e-08	8.24634e-09	508	tags=28%, list=3%, signal=27%	IL6/FOSB/FOS/CXCL8/CCL2/PTGS2/CXCL1/CXCL3/IL1B/TNFAIP3/FOSL1/CCL20/CCL11/CXCL2/CSF3/S100A9/MMP9/S100A8/MMP1/JUN/CCL7/NFKB1/CEBPB/CXCL10/NFKBIA/CXCL5
hsa04668	TNF signaling pathway	116	0.823998	2.31727	1e-10	1.16684e-08	8.24634e-09	786	tags=34%, list=4%, signal=32%	IL6/SELE/FOS/CCL2/PTGS2/LIF/CXCL1/CXCL3/JUNB/IL1B/ICAM1/TNFAIP3/CCL20/CXCL2/IRF1/SOCS3/BIRC3/MMP9/CREB5/JUN/MLKL/NFKB1/IL18R1/MAP3K8/BCL3/TNFRSF1B/CEBPB/CXCL10/MAP3K14/VCAM1/NFKBIA/RIPK1/CXCL5/CX3CL1/ATF4/PIK3R3/TNFRSF1A/CASP3/VEGFC
hsa04060	Cytokine-cytokine receptor interaction	284	0.681933	2.13473	1e-10	1.16684e-08	8.24634e-09	693	tags=18%, list=4%, signal=18%	IL6/CXCL8/CCL2/LIF/CXCL1/CXCL3/IL1B/IL1RL1/CCL20/TNFRSF12A/CCL8/CCL11/CXCL2/IL1R2/INHBA/CSF3/IL18RAP/CXCR2/CXCR4/CCL3/IL4R/IL1RN/RELT/TNFRSF10D/CCL7/OSMR/BMP2/CSF2RB/IL18R1/CLCF1/TNFRSF11B/IL15RA/IL1RAP/CCL4/TNFRSF10B/TNFRSF1B/OSM/CXCL10/PPBP/IL6R/IL1R1/BMP10/NGFR/CXCL5/CX3CL1/TNFRSF10A/CXCR1/ACKR3/INHBB/CSF3R/TNFRSF1A/IL3RA
hsa05417	Lipid and atherosclerosis	206	0.703323	2.11335	1.3222e-10	1.16684e-08	8.24634e-09	1331	tags=24%, list=7%, signal=22%	IL6/SELE/FOS/CXCL8/CCL2/CXCL1/CXCL3/IL1B/ICAM1/CXCL2/HSPA6/MMP9/MMP1/CCL3/JUN/LDLR/NFKB1/TNFRSF10B/NCF2/VCAM1/NCF1/HSPA1A/NFKBIA/NFATC1/LBP/NFATC2/STAT3/TLR2/ATF4/NLRP3/TNFRSF10A/NCF4/PIK3R3/TNFRSF1A/CASP3/ERN1/EIF2AK3/CD40/DDIT3/TLR4/CAMK2B/TICAM1/CYCS/EIF2S1/ITPR1/CDC42/LYN/JAK2/IRF7
hsa04010	MAPK signaling pathway	291	0.615065	1.93338	1.7932e-08	1.266e-06	8.94712e-07	2110	tags=26%, list=11%, signal=23%	FOS/DUSP5/MYC/IL1B/DUSP2/GADD45B/GADD45G/AREG/GADD45A/HSPA6/NR4A1/EPHA2/JUN/DUSP4/ANGPT2/DUSP6/DUSP1/EREG/NFKB1/MAP3K8/IL1RAP/FGF2/VEGFA/MAP3K14/IL1R1/HSPA1A/RELB/EFNA1/NFATC1/NGFR/ATF4/FGF18/FLT1/TNFRSF1A/BRAF/DUSP8/CASP3/VEGFC/HGF/DUSP10/DDIT3/RASA2/CACNA2D2/MAPKAPK2/DUSP16/JUND/TGFA/SRF/FGFR1/CDC42/CRK/RAPGEF2/RPS6KA1/RELA/MAP2K1/FLNA/CHUK/RASGRF2/CACNA1D/HSPB1/MAPK8/DUSP3/MAP4K4/MAP3K11/CACNB…
hsa05206	MicroRNAs in cancer	171	0.681761	2.01033	3.83047e-08	2.25359e-06	1.59267e-06	1262	tags=22%, list=7%, signal=21%	PTGS2/MYC/CDKN1A/HMOX1/THBS1/MIR21/PLAU/PIM1/MIR155/ITGA5/MMP9/CYP1B1/MCL1/NFKB1/CD44/MIR17/VEGFA/TNC/IRS2/EZH2/EFNA1/ABL1/STAT3/MIR1-2/DDIT4/SLC7A1/RASSF1/PIK3R3/E2F3/CASP3/SPRY2/TNN/VIM/SIRT1/SOCS1/MIRLET7D/BAK1/CRK
hsa04933	AGE-RAGE signaling pathway in diabetic complications	99	0.758791	2.09487	1.06995e-07	5.39562e-06	3.81321e-06	786	tags=20%, list=4%, signal=19%	IL6/SELE/CXCL8/CCL2/IL1B/EGR1/ICAM1/THBD/SERPINE1/PIM1/JUN/NFKB1/VEGFA/VCAM1/NFATC1/STAT3/PIK3R3/COL4A1/CASP3/VEGFC
hsa05163	Human cytomegalovirus infection	215	0.636054	1.92305	1.98698e-07	8.76753e-06	6.19623e-06	1453	tags=20%, list=8%, signal=19%	IL6/CXCL8/CCL2/PTGS2/MYC/IL1B/CDKN1A/CXCR2/CREB5/CXCR4/CCL3/NFKB1/CCL4/VEGFA/IL6R/IL1R1/TAP1/NFKBIA/NFATC1/RIPK1/NFATC2/CX3CL1/STAT3/ATF4/PIK3R3/TNFRSF1A/BCAR1/E2F3/CASP3/CCR1/AKAP13/PTGER4/CYCS/ADCY6/ADCY4/ITPR1/BAK1/CRK/GNAI3/PTGER2/RELA/MAP2K1/PXN
hsa05167	Kaposi sarcoma-associated herpesvirus infection	188	0.656423	1.95941	2.30396e-07	9.03666e-06	6.38643e-06	1331	tags=19%, list=7%, signal=18%	IL6/FOS/CXCL8/PTGS2/CXCL1/CXCL3/ZFP36/MYC/CDKN1A/ICAM1/CXCL2/JUN/ANGPT2/NFKB1/FGF2/VEGFA/NFKBIA/NFATC1/NFATC2/STAT3/PIK3R3/TNFRSF1A/RCAN1/E2F3/CASP3/CCR1/HIF1A/TICAM1/CYCS/MAPKAPK2/MAP1LC3B/ITPR1/BAK1/LYN/JAK2/IRF7
hsa05161	Hepatitis B	158	0.670588	1.95455	2.96072e-07	1.04513e-05	7.38622e-06	1062	tags=16%, list=6%, signal=15%	IL6/FOS/EGR3/CXCL8/EGR2/MYC/CDKN1A/MMP9/CREB5/JUN/NFKB1/NFKBIA/NFATC1/NFATC2/STAT3/TLR2/ATF4/PIK3R3/BRAF/E2F3/CASP3/DDX3X/TLR4/TICAM1/CYCS
hsa05202	Transcriptional misregulation in cancer	168	0.659636	1.94077	4.50325e-07	1.44513e-05	1.02131e-05	1100	tags=20%, list=6%, signal=19%	IL6/CXCL8/NR4A3/MYC/CDKN1A/BCL2A1/GADD45B/PLAU/GADD45G/IL1R2/GADD45A/BIRC3/MMP9/NFKBIZ/REL/DUSP6/NFKB1/CEBPB/NGFR/BCL6/FLT1/GZMB/DDX5/JMJD1C/ERG/ETV6/PER2/CD40/DDIT3/DOT1L/TRAF1/PLAT/DEFA1
hsa05166	Human T-cell leukemia virus 1 infection	218	0.626281	1.89672	5.0987e-07	1.49987e-05	1.05999e-05	743	tags=12%, list=4%, signal=12%	IL6/FOS/EGR2/ZFP36/MYC/CDKN1A/EGR1/ICAM1/FOSL1/IL1R2/CREB5/JUN/ETS2/NFKB1/IL15RA/ETS1/MAP3K14/IL1R1/RELB/MSX1/NFKBIA/NFATC1/NFATC2/ATF4/PIK3R3/TNFRSF1A/E2F3
hsa05200	Pathways in cancer	517	0.507046	1.70084	7.43665e-07	2.01934e-05	1.42711e-05	1446	tags=16%, list=8%, signal=15%	IL6/FOS/CXCL8/PTGS2/MYC/CDKN1A/HMOX1/GADD45B/GADD45G/PIM1/GADD45A/CKS2/BIRC3/MMP9/CXCR4/MMP1/IL4R/JUN/BDKRB1/BMP2/CSF2RB/NFKB1/EGLN3/PMAIP1/IL15RA/FGF2/ETS1/VEGFA/HES1/IL6R/EDNRB/NFKBIA/RALGDS/RASSF5/ABL1/STAT3/FGF18/CUL1/RASSF1/PIK3R3/CSF3R/FZD5/COL4A1/IL3RA/BRAF/PPARD/E2F3/CASP3/VEGFC/HGF/PTGER4/LAMC2/EML4/HIF1A/CAMK2B/NKX3-1/CYCS/TRAF1/DAPK3/WNT9A/ADCY6/ADCY4/HEYL/BDKRB2/TGFA/COL4A2/EDNRA/BAK1…
hsa04061	Viral protein interaction with cytokine and cytokine receptor	95	0.744146	2.04195	9.05871e-07	2.28409e-05	1.61422e-05	874	tags=32%, list=5%, signal=30%	IL6/CXCL8/CCL2/CXCL1/CXCL3/CCL20/CCL8/CCL11/CXCL2/IL18RAP/CXCR2/CXCR4/CCL3/TNFRSF10D/CCL7/IL18R1/CCL4/TNFRSF10B/TNFRSF1B/CXCL10/PPBP/IL6R/CXCL5/CX3CL1/TNFRSF10A/CXCR1/ACKR3/TNFRSF1A/CCR1/PF4
hsa04064	NF-kappa B signaling pathway	100	0.743105	2.05626	1.10699e-06	2.60512e-05	1.8411e-05	1320	tags=33%, list=7%, signal=31%	CXCL8/PTGS2/CXCL1/CXCL3/IL1B/ICAM1/BCL2A1/TNFAIP3/GADD45B/CXCL2/PLAU/GADD45G/GADD45A/BIRC3/NFKB1/CCL4/MAP3K14/VCAM1/IL1R1/RELB/NFKBIA/RIPK1/LBP/MALT1/TNFRSF1A/CD40/TLR4/TICAM1/TRAF1/CCL13/BCL10/TNFSF14/LYN
hsa04625	C-type lectin receptor signaling pathway	101	0.729467	2.02491	1.48608e-06	3.27866e-05	2.31711e-05	1218	tags=26%, list=7%, signal=24%	IL6/EGR3/PTGS2/EGR2/IL1B/IRF1/JUN/NFKB1/BCL3/CLEC4E/MAP3K14/RELB/CLEC4D/NFKBIA/NFATC1/NFATC2/NLRP3/MALT1/PIK3R3/PLK3/CLEC7A/FCER1G/MAPKAPK2/LSP1/BCL10/ITPR1
hsa04062	Chemokine signaling pathway	185	0.641257	1.91226	2.22128e-06	4.61243e-05	3.25972e-05	1453	tags=21%, list=8%, signal=20%	CXCL8/CCL2/CXCL1/CXCL3/CCL20/CCL8/CCL11/CXCL2/CXCR2/CXCR4/CCL3/FGR/CCL7/NFKB1/CCL4/CXCL10/PPBP/NCF1/NFKBIA/CXCL5/CX3CL1/STAT3/CXCR1/PIK3R3/BRAF/BCAR1/CCR1/PF4/ADCY6/ADCY4/CCL13/CDC42/CRK/GNAI3/LYN/JAK2/RELA/MAP2K1/PXN
hsa04630	JAK-STAT signaling pathway	162	0.655859	1.924	3.10917e-06	6.09743e-05	4.30921e-05	693	tags=14%, list=4%, signal=13%	IL6/LIF/MYC/CDKN1A/PIM1/CISH/SOCS3/CSF3/SOCS2/MCL1/IL4R/OSMR/CSF2RB/CLCF1/IL15RA/OSM/IL6R/STAT3/FHL1/PIK3R3/CSF3R/IL3RA
hsa05323	Rheumatoid arthritis	87	0.749051	2.02865	3.35062e-06	6.22509e-05	4.39942e-05	605	tags=21%, list=3%, signal=20%	IL6/FOS/CXCL8/CCL2/CXCL1/CXCL3/IL1B/ICAM1/CCL20/CXCL2/MMP1/CCL3/JUN/VEGFA/CXCL5/CTSL/TLR2/FLT1
hsa05146	Amoebiasis	101	0.708518	1.96676	6.48024e-06	0.000114376	8.08324e-05	1429	tags=23%, list=8%, signal=21%	IL6/CXCL8/CXCL1/CXCL3/IL1B/CXCL2/IL1R2/NFKB1/IL1R1/GNA15/ARG2/TLR2/PIK3R3/COL4A1/CASP3/LAMC2/SERPINB9/TLR4/COL4A2/GNA14/CD1D/ARG1/RELA
hsa05418	Fluid shear stress and atherosclerosis	132	0.666833	1.90693	9.09229e-06	0.000152837	0.000108014	679	tags=17%, list=4%, signal=16%	SELE/FOS/CCL2/IL1B/HMOX1/ICAM1/THBD/IL1R2/MMP9/JUN/DUSP1/SDC4/NFKB1/VEGFA/NCF2/VCAM1/IL1R1/NCF1/CTSL/KLF2/PIK3R3/TNFRSF1A
hsa04380	Osteoclast differentiation	134	0.652195	1.8721	1.52266e-05	0.000233695	0.000165158	1745	tags=33%, list=9%, signal=30%	FOSB/FOS/JUNB/IL1B/FOSL1/SOCS3/FOSL2/JUN/NFKB1/TNFRSF11B/NCF2/MAP3K14/IL1R1/NCF1/RELB/NFKBIA/NFATC1/NFATC2/LILRB2/NCF4/PIK3R3/TNFRSF1A/LILRA2/FHL2/LCP2/FCGR3A/SOCS1/JUND/ITPR1/FCGR2C/RELA/SQSTM1/MAP2K1/LILRA3/LILRB3/CHUK/FCGR2A/FCGR1A/IFNGR1/CYLD/IFNGR2/GAB2/MAPK8/ATP2A2
hsa04621	NOD-like receptor signaling pathway	175	0.617168	1.82553	1.51111e-05	0.000233695	0.000165158	1337	tags=17%, list=7%, signal=16%	IL6/CXCL8/CCL2/CXCL1/CXCL3/IL1B/TNFAIP3/NAMPT/CXCL2/BIRC3/JUN/PANX1/NFKB1/IFI16/CASP4/NFKBIA/RIPK1/RIPK2/NLRP3/NOD1/TXN/DHX33/TLR4/TICAM1/DEFA1/MAP1LC3B/ITPR1/IRF7/GBP1
hsa04066	HIF-1 signaling pathway	105	0.682091	1.89113	1.64486e-05	0.000241375	0.000170585	2035	tags=30%, list=11%, signal=27%	IL6/CDKN1A/HMOX1/SERPINE1/PFKFB3/ANGPT2/NFKB1/EGLN3/VEGFA/IL6R/STAT3/FLT1/PIK3R3/HK3/HIF1A/TLR4/CAMK2B/TFRC/EIF4E/HK2/SLC2A1/RELA/MAP2K1/ENO2/EGLN1/IFNGR1/IFNGR2/LDHA/PFKP/IFNG/IGF1R/INSR
hsa04218	Cellular senescence	152	0.630517	1.83023	1.70945e-05	0.000241375	0.000170585	1446	tags=16%, list=8%, signal=15%	IL6/CXCL8/MYC/CDKN1A/SERPINE1/GADD45B/GADD45G/GADD45A/NFKB1/ETS1/NFATC1/NFATC2/RASSF5/PIK3R3/E2F3/MAPKAPK2/SIRT1/ITPR1/CDK2/IGFBP3/RAD9B/TRAF3IP2/RELA/SQSTM1/MAP2K1
hsa04928	Parathyroid hormone synthesis, secretion and action	113	0.680703	1.91256	2.19009e-05	0.000297347	0.000210142	1446	tags=21%, list=8%, signal=20%	FOS/NR4A2/CDKN1A/EGR1/SGK1/HBEGF/CREB5/PDE4B/PDE4D/ATF4/PTHLH/BRAF/VDR/AKAP13/ADCY6/MMP25/ADCY4/JUND/ITPR1/FGFR1/GNAI3/OXSR1/MAFB/MAP2K1
hsa05120	Epithelial cell signaling in Helicobacter pylori infection	70	0.742085	1.93815	4.87163e-05	0.000636921	0.000450127	1563	tags=27%, list=8%, signal=25%	CXCL8/CXCL1/CXCL3/CXCL2/CXCR2/HBEGF/JUN/NFKB1/MAP3K14/NFKBIA/CXCR1/CASP3/NOD1/ADAM17/CDC42/LYN/RELA/ATP6V1B2/CHUK
hsa05219	Bladder cancer	41	0.818811	1.9872	6.88907e-05	0.000868515	0.0006138	743	tags=29%, list=4%, signal=28%	CXCL8/MYC/CDKN1A/THBS1/MMP9/HBEGF/MMP1/VEGFA/RASSF1/TYMP/BRAF/E2F3
hsa04151	PI3K-Akt signaling pathway	349	0.497077	1.59522	9.34131e-05	0.00113706	0.00080359	1323	tags=14%, list=7%, signal=13%	IL6/MYC/CDKN1A/THBS1/AREG/CSF3/NR4A1/SGK1/EPHA2/ITGA5/CREB5/MCL1/IL4R/ANGPT2/EREG/OSMR/NFKB1/FGF2/VEGFA/OSM/TNC/IL6R/EFNA1/ITGA10/NGFR/DDIT4/TLR2/ATF4/FGF18/PPP2R1B/FLT1/PIK3R3/CSF3R/COL4A1/IL3RA/VEGFC/HGF/PPP2CA/LAMC2/COL9A1/TNN/TLR4/EIF4E/SPP1/TGFA/COL4A2/FGFR1/CDK2/JAK2
hsa05031	Amphetamine addiction	67	0.744896	1.94279	0.00011223	0.00130438	0.000921834	1108	tags=12%, list=6%, signal=11%	FOSB/FOS/ARC/CREB5/JUN/ATF4/CAMK2B/SIRT1
hsa00591	Linoleic acid metabolism	24	-0.830522	-1.81121	0.000115936	0.00130438	0.000921834	621	tags=12%, list=3%, signal=12%	PLA2G4A/PLA2G2A/ALOX15
hsa05135	Yersinia infection	132	0.6291	1.79903	0.000118244	0.00130438	0.000921834	1616	tags=21%, list=9%, signal=20%	IL6/FOS/CXCL8/CCL2/IL1B/ITGA5/JUN/NFKB1/NFKBIA/NFATC1/NFATC2/ARPC5L/NLRP3/PIK3R3/BCAR1/LCP2/TLR4/TICAM1/CDC42/ARF6/CRK/RPS6KA1/RELA/MAP2K1/PXN/CHUK/PIP5K1C/FCGR2A
hsa05210	Colorectal cancer	86	0.691384	1.87126	0.000133995	0.00143075	0.00101114	760	tags=16%, list=4%, signal=16%	FOS/MYC/CDKN1A/GADD45B/GADD45G/AREG/GADD45A/JUN/EREG/PMAIP1/RALGDS/PIK3R3/BRAF/CASP3
hsa04932	Non-alcoholic fatty liver disease	151	0.607579	1.76565	0.000137806	0.00143075	0.00101114	1137	tags=13%, list=6%, signal=12%	IL6/FOS/CXCL8/IL1B/SOCS3/JUN/NFKB1/IRS2/IL6R/ATF4/PIK3R3/TNFRSF1A/CASP3/PRKAG2/ERN1/EIF2AK3/DDIT3/CYCS/EIF2S1
hsa00982	Drug metabolism - cytochrome P450	55	-0.711548	-1.80341	0.000165036	0.0016645	0.00117634	1908	tags=24%, list=10%, signal=21%	ADH5/GSTM3/HPGDS/GSTM5/ALDH3B1/FMO3/MGST1/ADH1B/FMO2/GSTA4/ADH1C/FMO1/AOX1
hsa04820	Cytoskeleton in muscle cells	229	0.551983	1.67937	0.000173412	0.0017004	0.00120172	2611	tags=36%, list=14%, signal=31%	THBS1/XIRP1/ITGA5/LMNB1/FLNC/SDC4/PDLIM3/ANKRD2/MYL2/PDLIM4/LMNA/TNNI1/ATP1B3/VCAN/ITGA10/ZYX/FHL1/LMOD2/CSRP2/ACTA1/FBN2/COL4A1/TNNT1/TPM4/XIRP2/MYOT/FHL2/ANKRD1/COL9A1/TRIM55/VIM/ANKRD23/FHL3/COL5A2/NRAP/TNNT3/EMD/TRIM63/MYH9/COL4A2/CSRP3/LBR/ATP1A2/ACTG2/NID1/MYOZ1/NEB/AMPD2/ENO2/TLN1/ANK2/THBS2/ATP1B4/TTN/TPM3/ITGA8/ITGB6/DES/ANK3/COL27A1/SNTA1/COL5A3/LMOD1/SUN1/COL24A1/ITGA9/ATP1B1/COL9A3/AT…
hsa04210	Apoptosis	131	0.619417	1.76706	0.000195185	0.00186217	0.00131604	1236	tags=27%, list=7%, signal=25%	FOS/BCL2A1/GADD45B/GADD45G/GADD45A/BIRC3/MCL1/JUN/LMNB1/CSF2RB/NFKB1/PMAIP1/TNFRSF10B/MAP3K14/LMNA/NFKBIA/RIPK1/CTSC/CTSL/ATF4/TNFRSF10A/GZMB/PIK3R3/TNFRSF1A/IL3RA/CASP3/ERN1/EIF2AK3/DDIT3/CTSV/CYCS/TRAF1/EIF2S1/ITPR1/BAK1
hsa04620	Toll-like receptor signaling pathway	101	0.648444	1.8	0.000209931	0.00195015	0.00137821	1045	tags=18%, list=6%, signal=17%	IL6/FOS/CXCL8/IL1B/CCL3/JUN/NFKB1/MAP3K8/CCL4/CXCL10/NFKBIA/RIPK1/LBP/TLR2/PIK3R3/CD40/TLR4/TICAM1
hsa04659	Th17 cell differentiation	104	0.650714	1.80749	0.000293613	0.00265758	0.00187818	535	tags=13%, list=3%, signal=13%	IL6/FOS/IL1B/IL4R/JUN/NFKB1/IL1RAP/IL6R/IL1R1/NFKBIA/NFATC1/NFATC2/STAT3/NFKBIE
hsa05132	Salmonella infection	240	0.516236	1.57775	0.000572919	0.00505601	0.00357321	1491	tags=18%, list=8%, signal=17%	IL6/FOS/CXCL8/MYC/IL1B/BIRC3/JUN/MLKL/NFKB1/TNFRSF10B/MYL2/CASP4/RHOJ/TUBB6/NFKBIA/RIPK1/RIPK2/MYL12A/ARPC5L/TLR2/NLRP3/TNFRSF10A/TUBB2A/TNFRSF1A/CASP3/TUBB2B/NOD1/TXN/TUBB3/TLR4/CYCS/BAK1/TUBB4B/CDC42/ARF6/CYTH1/RHOB/KIF5C/PLEKHM2/RELA/MAP2K1/SNX9/FLNA
hsa05144	Malaria	48	0.767375	1.90891	0.0005987	0.00515466	0.00364293	967	tags=29%, list=5%, signal=28%	IL6/SELE/CXCL8/CCL2/IL1B/ICAM1/THBS1/CSF3/ACKR1/VCAM1/TLR2/HGF/CD40/TLR4
hsa05222	Small cell lung cancer	92	0.646779	1.76311	0.000866576	0.00728337	0.00514733	1276	tags=22%, list=7%, signal=20%	PTGS2/MYC/CDKN1A/GADD45B/GADD45G/GADD45A/CKS2/BIRC3/NFKB1/NFKBIA/PIK3R3/COL4A1/E2F3/CASP3/LAMC2/CYCS/TRAF1/COL4A2/BAK1/CDK2
hsa05169	Epstein-Barr virus infection	192	0.539102	1.60887	0.000997487	0.00818867	0.00578713	760	tags=12%, list=4%, signal=12%	IL6/MYC/CDKN1A/ICAM1/TNFAIP3/GADD45B/GADD45G/GADD45A/JUN/NFKB1/CD44/HES1/CXCL10/MAP3K14/TAP1/RELB/NFKBIA/RIPK1/STAT3/NFKBIE/TLR2/PIK3R3/E2F3/CASP3
hsa05142	Chagas disease	100	0.630017	1.74333	0.00108542	0.00870803	0.00615418	1277	tags=21%, list=7%, signal=20%	IL6/FOS/CXCL8/CCL2/IL1B/SERPINE1/CCL3/JUN/NFKB1/GNA15/NFKBIA/TLR2/PPP2R1B/PIK3R3/TNFRSF1A/PPP2CA/TLR4/TICAM1/BDKRB2/GNA14/GNAI3
hsa05162	Measles	132	0.581497	1.6629	0.00114068	0.00894802	0.00632378	1331	tags=17%, list=7%, signal=16%	IL6/FOS/IL1B/TNFAIP3/HSPA6/JUN/NFKB1/MX2/HSPA1A/NFKBIA/STAT3/TLR2/PIK3R3/CASP3/EIF2AK3/SLAMF1/TLR4/CYCS/EIF2S1/BAK1/CDK2/IRF7
hsa00350	Tyrosine metabolism	36	-0.734224	-1.71251	0.00124804	0.00957739	0.00676857	2728	tags=31%, list=15%, signal=26%	ADH1A/FAHD1/AOC3/FAH/ADH5/MIF/GSTZ1/ALDH3B1/ADH1B/ADH1C/AOX1
hsa05410	Hypertrophic cardiomyopathy	98	0.601335	1.65481	0.00161349	0.0121183	0.00856432	2481	tags=29%, list=13%, signal=25%	IL6/ITGA5/MYL2/LMNA/ITGA10/TPM4/PRKAG2/CACNA2D2/EMD/AGT/CACNA1D/ATP2A2/TTN/TPM3/ITGA8/ITGB6/CACNB1/DES/SNTA1/TGFB3/TGFB2/ITGA9/ITGB3/ITGA1/MYBPC3/RYR2/SLC8A3/ITGA2
hsa04917	Prolactin signaling pathway	69	0.666462	1.73564	0.00166989	0.0122807	0.00867904	1446	tags=17%, list=8%, signal=16%	FOS/IRF1/CISH/SOCS3/SOCS2/NFKB1/STAT3/PIK3R3/SOCS1/JAK2/RELA/MAP2K1
hsa05020	Prion disease	245	0.482574	1.48557	0.0019091	0.0137533	0.00971982	1833	tags=14%, list=10%, signal=13%	IL6/IL1B/EGR1/HSPA6/CREB5/NCF2/NCF1/HSPA1A/TUBB6/ATF4/NCF4/TUBB2A/PIK3R3/CASP3/TUBB2B/EIF2AK3/TUBB3/DDIT3/CYCS/EIF2S1/ITPR1/TUBB4B/STIP1/KIF5C/COX4I2/PPIF/CACNA1D/NOTCH1/CREB3L2/PSMD11/TUBA4A/MAPK8/CAV1/PSMD12/IL1A
hsa05164	Influenza A	160	0.545873	1.5964	0.00240998	0.0170144	0.0120245	1446	tags=18%, list=8%, signal=17%	IL6/CXCL8/CCL2/IL1B/ICAM1/SOCS3/NXT1/DNAJB1/NFKB1/MX2/KPNA2/TNFRSF10B/CXCL10/NUP98/NFKBIA/NLRP3/TNFRSF10A/PIK3R3/TNFRSF1A/CASP3/TLR4/TICAM1/CYCS/EIF2S1/BAK1/JAK2/IRF7/RELA/MAP2K1
hsa05134	Legionellosis	55	0.68403	1.75243	0.00249667	0.0171493	0.0121198	1062	tags=29%, list=6%, signal=28%	IL6/CXCL8/CXCL1/CXCL3/IL1B/CXCL2/HSPA6/NFKB1/HSPA1A/NFKBIA/TLR2/CLK1/CASP3/SAR1A/TLR4/CYCS
hsa04640	Hematopoietic cell lineage	94	0.603277	1.65212	0.00252624	0.0171493	0.0121198	1416	tags=20%, list=8%, signal=19%	IL6/IL1B/IL1R2/CSF3/ITGA5/IL4R/CD44/IL6R/IL1R1/CD55/CSF3R/IL3RA/ANPEP/CD59/CD38/TFRC/CD1D/IL11/MME
hsa04148	Efferocytosis	152	0.547576	1.58947	0.00261668	0.0174281	0.0123168	1446	tags=24%, list=8%, signal=23%	CH25H/PTGS2/DUSP5/SPHK1/DUSP2/THBS1/SGK1/DUSP4/PANX1/CEBPB/NFATC1/NFATC2/CX3CL1/ARG2/P2RY6/BCAR1/PPARD/DUSP8/CASP3/PTGER4/HIF1A/CAMK2B/ADAM17/MAPKAPK2/SIRT1/DUSP16/P2RY2/SCARF1/S1PR1/CRK/AXL/JAK2/ARG1/XKR4/PTGER2/SLC2A1/MAP2K1
hsa05171	Coronavirus disease - COVID-19	217	0.49843	1.50911	0.00282309	0.0184546	0.0130423	679	tags=10%, list=4%, signal=10%	IL6/FOS/CXCL8/CCL2/IL1B/C5AR1/CSF3/HBEGF/MMP1/JUN/RPL17/NFKB1/MX2/CXCL10/IL6R/NFKBIA/RPS24/STAT3/TLR2/NLRP3/PIK3R3/TNFRSF1A
hsa04921	Oxytocin signaling pathway	146	0.544776	1.57946	0.00328115	0.021059	0.0148829	1826	tags=16%, list=10%, signal=14%	FOS/PTGS2/CDKN1A/RGS2/JUN/NFATC1/NFATC2/RCAN1/PRKAG2/CAMK2B/CACNA2D2/KCNJ2/CD38/ADCY6/ADCY4/ITPR1/GNAI3/MAP2K1/MYLK/CACNA1D/OXTR/CACNB1/PIK3R5
hsa04936	Alcoholic liver disease	136	0.551239	1.58419	0.00358766	0.0226151	0.0159826	1108	tags=14%, list=6%, signal=13%	IL6/CXCL8/CXCL1/CXCL3/IL1B/CXCL2/C5AR1/NFKB1/MAP3K14/NFKBIA/RIPK1/LBP/TNFRSF1A/CASP3/PRKAG2/TLR4/ACOX3/TICAM1/SIRT1
hsa05224	Breast cancer	144	0.533533	1.54821	0.0047913	0.0296724	0.0209702	1250	tags=14%, list=7%, signal=13%	FOS/MYC/CDKN1A/GADD45B/GADD45G/GADD45A/JUN/FGF2/HES1/FGF18/PIK3R3/FZD5/BRAF/E2F3/CSNK1A1/WNT9A/HEYL/BAK1/FGFR1/WNT10B
hsa05205	Proteoglycans in cancer	197	0.50716	1.51658	0.00548509	0.0333834	0.0235929	2048	tags=22%, list=11%, signal=20%	MYC/CDKN1A/THBS1/PLAUR/MIR21/PLAU/ITGA5/MMP9/HBEGF/SDC4/FGF2/CD44/VEGFA/STAT3/CTSL/TLR2/PIK3R3/DDX5/FZD5/BRAF/CASP3/HGF/HIF1A/TLR4/CAMK2B/WNT9A/ITPR1/FGFR1/WNT10B/CDC42/MAP2K1/PXN/FLNA/ANK1/GPC1/ANK2/CAV1/CTNNB1/ANK3/FZD8/VAV1/HPSE/IGF1R/TGFB2
hsa05213	Endometrial cancer	58	0.647475	1.67108	0.00627641	0.0375521	0.026539	701	tags=12%, list=4%, signal=12%	MYC/CDKN1A/GADD45B/GADD45G/GADD45A/PIK3R3/BRAF
hsa04012	ErbB signaling pathway	83	0.59473	1.59808	0.00669876	0.038765	0.0273961	1262	tags=16%, list=7%, signal=15%	MYC/CDKN1A/AREG/HBEGF/JUN/EREG/ABL2/ABL1/PIK3R3/BRAF/CAMK2B/TGFA/CRK
hsa05322	Systemic lupus erythematosus	49	-0.627042	-1.56783	0.00664836	0.038765	0.0273961	2487	tags=33%, list=13%, signal=28%	HLA-DPA1/TRIM21/C6/C7/C5/HLA-DRA/HLA-DMA/HLA-DMB/C4A/C1R/C1S/C1QC/C2/C1QB/C1QA/C3
hsa05143	African trypanosomiasis	35	0.741028	1.74116	0.00688304	0.0391889	0.0276958	410	tags=17%, list=2%, signal=17%	IL6/SELE/IL1B/ICAM1/VCAM1/F2RL1
hsa01523	Antifolate resistance	29	0.75487	1.71325	0.00780417	0.0430449	0.0304208	630	tags=14%, list=3%, signal=13%	IL6/IL1B/NFKB1/ABCG2
hsa04068	FoxO signaling pathway	128	0.549143	1.5555	0.00779916	0.0430449	0.0304208	2187	tags=27%, list=12%, signal=24%	IL6/CDKN1A/GADD45B/GADD45G/GADD45A/SGK1/HOMER1/IRS2/STAT3/BCL6/KLF2/PIK3R3/BRAF/PLK3/PRKAG2/SIRT1/PLK2/S1PR1/CDK2/MAP2K1/CHUK/USP7/CSNK1E/GABARAPL1/MAPK8/SOD2/SMAD3/TGFB3/IGF1R/INSR/TGFB2/S1PR4/NRAS/IL7R/FOXO3
hsa05030	Cocaine addiction	49	0.67287	1.68302	0.00850062	0.0443844	0.0313675	581	tags=10%, list=3%, signal=10%	FOSB/CREB5/JUN/NFKB1/ATF4
hsa05223	Non-small cell lung cancer	72	0.611728	1.60025	0.00835279	0.0443844	0.0313675	1446	tags=22%, list=8%, signal=21%	CDKN1A/GADD45B/GADD45G/GADD45A/RASSF5/STAT3/RASSF1/PIK3R3/BRAF/E2F3/HGF/EML4/TGFA/BAK1/KIF5C/MAP2K1
hsa05220	Chronic myeloid leukemia	75	0.611087	1.59772	0.00822514	0.0443844	0.0313675	2097	tags=29%, list=11%, signal=26%	MYC/CDKN1A/GADD45B/GADD45G/GADD45A/NFKB1/NFKBIA/ABL1/PIK3R3/BRAF/E2F3/BAK1/CRK/RELA/MAP2K1/CHUK/GAB2/SMAD3/SHC1/TGFB3/TGFB2/NRAS
hsa05140	Leishmaniasis	73	0.604546	1.58274	0.00854997	0.0443844	0.0313675	2048	tags=32%, list=11%, signal=28%	FOS/PTGS2/IL1B/JUN/NFKB1/NCF2/NCF1/NFKBIA/TLR2/NCF4/FCGR3A/TLR4/JAK2/FCGR2C/RELA/FCGR2A/FCGR1A/IFNGR1/IFNGR2/IL1A/IFNG/TGFB3/TGFB2
hsa04978	Mineral absorption	57	0.643256	1.65409	0.0089904	0.0459944	0.0325053	779	tags=21%, list=4%, signal=20%	HMOX1/MT1M/MT2A/MT1X/MT1HL1/MT1H/MT1F/MT1E/ATP1B3/MT1G/SLC26A6/VDR
hsa05215	Prostate cancer	96	0.559122	1.53624	0.00973535	0.0488549	0.0345269	1758	tags=23%, list=9%, signal=21%	CDKN1A/PLAU/IL1R2/MMP9/CREB5/NFKB1/NFKBIA/ATF4/PIK3R3/BRAF/E2F3/ERG/NKX3-1/PLAT/TGFA/FGFR1/CDK2/RELA/MAP2K1/CHUK/CREB3L2/CTNNB1
hsa05207	Chemical carcinogenesis - receptor activation	185	0.494557	1.47479	0.00982633	0.0488549	0.0345269	1664	tags=15%, list=9%, signal=14%	FOS/MYC/KLF4/CYP1B1/CREB5/JUN/NFKB1/KPNA2/FGF2/VEGFA/STAT3/BCL6/ATF4/FGF18/PIK3R3/VDR/ADCY6/ADCY4/MIRLET7D/GNAI3/RPS6KA1/JAK2/RELA/MAP2K1/MIR29A/ADRB1/CACNA1D/CREB3L2

## Sheet: GSE4386_P_go_result
ONTOLOGY	ID	Description	GeneRatio	BgRatio	pvalue	qvalue	geneID	Count
BP	GO:0032496	response to lipopolysaccharide	24/208	348/18870	8.75485e-13	2.18134e-09	IL6/CXCL2/MIR21/CCL2/SELE/ZFP36/CXCL8/TNFAIP3/SLC7A5/ARID5A/FOS/PTGS2/CXCL3/THBD/FOSL2/NR4A1/CXCL1/SERPINE1/GCH1/NFKBIZ/SLPI/IL1B/TNFRSF1B/CSF3	24
BP	GO:0002237	response to molecule of bacterial origin	24/208	369/18870	3.06634e-12	3.82002e-09	IL6/CXCL2/MIR21/CCL2/SELE/ZFP36/CXCL8/TNFAIP3/SLC7A5/ARID5A/FOS/PTGS2/CXCL3/THBD/FOSL2/NR4A1/CXCL1/SERPINE1/GCH1/NFKBIZ/SLPI/IL1B/TNFRSF1B/CSF3	24
MF	GO:0001228	DNA-binding transcription activator activity, RNA polymerase II-specific	25/212	471/18496	1.95929e-10	4.49373e-08	FOSB/EGR1/EGR3/CSRNP1/NR4A2/NR4A3/MAFF/JUNB/EGR2/MYC/IRF1/CEBPD/FOS/ATF3/FOSL1/FOSL2/NR4A1/KLF4/KLF10/KLF6/JUN/REL/GRHL1/SOX17/EGR4	25
MF	GO:0001216	DNA-binding transcription activator activity	25/212	475/18496	2.3392e-10	4.49373e-08	FOSB/EGR1/EGR3/CSRNP1/NR4A2/NR4A3/MAFF/JUNB/EGR2/MYC/IRF1/CEBPD/FOS/ATF3/FOSL1/FOSL2/NR4A1/KLF4/KLF10/KLF6/JUN/REL/GRHL1/SOX17/EGR4	25
BP	GO:0060326	cell chemotaxis	20/208	325/18870	5.80155e-10	4.81834e-07	CH25H/IL6/CXCL2/EGR3/CCL2/THBS1/CXCL8/CCL8/CXCL3/HBEGF/TNFAIP6/NR4A1/CXCL1/GPR183/SERPINE1/DUSP1/EPHA2/CCL3/CCRL2/IL1B	20
BP	GO:0031960	response to corticosteroid	14/208	149/18870	1.1082e-09	6.90294e-07	FOSB/IL6/CDKN1A/ZFP36/IL1RN/FOS/PTGS2/FOSL1/FOSL2/STC1/AREG/SGK1/INHBA/CYP1B1	14
BP	GO:0050727	regulation of inflammatory response	22/208	425/18870	1.99212e-09	7.648e-07	IL6/SOCS3/MIR21/SELE/IER3/ZFP36/TNFAIP3/PTGS2/TNFAIP6/GPR4/KLF4/SPHK1/MIR22/LDLR/IL1RL1/SERPINE1/BIRC3/METRNL/NFKBIZ/CCL3/IL1B/TNFRSF1B	22
BP	GO:0006935	chemotaxis	23/208	468/18870	2.26391e-09	7.648e-07	CH25H/IL6/CXCL2/EGR3/CCL2/THBS1/CXCL8/PLAUR/CCL8/CXCL3/FOSL1/HBEGF/TNFAIP6/NR4A1/CXCL1/PLAU/GPR183/SERPINE1/DUSP1/EPHA2/CCL3/CCRL2/IL1B	23
BP	GO:0045444	fat cell differentiation	17/208	248/18870	2.37022e-09	7.648e-07	IL6/NR4A2/MIR21/NR4A3/ZFP36/EGR2/PIM1/CEBPD/PTGS2/FOSL2/NR4A1/KLF4/RGS2/HES1/INSIG1/STEAP4/METRNL	17
BP	GO:0042330	taxis	23/208	470/18870	2.45563e-09	7.648e-07	CH25H/IL6/CXCL2/EGR3/CCL2/THBS1/CXCL8/PLAUR/CCL8/CXCL3/FOSL1/HBEGF/TNFAIP6/NR4A1/CXCL1/PLAU/GPR183/SERPINE1/DUSP1/EPHA2/CCL3/CCRL2/IL1B	23
BP	GO:0071222	cellular response to lipopolysaccharide	16/208	226/18870	4.48601e-09	1.13802e-06	IL6/CXCL2/MIR21/CCL2/ZFP36/CXCL8/TNFAIP3/SLC7A5/ARID5A/CXCL3/CXCL1/SERPINE1/NFKBIZ/IL1B/TNFRSF1B/CSF3	16
BP	GO:0034612	response to tumor necrosis factor	17/208	259/18870	4.56748e-09	1.13802e-06	CCL2/SELE/ZFP36/THBS1/CXCL8/HAS2/TNFAIP3/FOS/CCL8/PTGS2/SPHK1/HES1/GCH1/BIRC3/CYP1B1/CCL3/TNFRSF1B	17
BP	GO:0071216	cellular response to biotic stimulus	17/208	265/18870	6.4417e-09	1.45909e-06	IL6/CXCL2/MIR21/CCL2/ZFP36/CXCL8/TNFAIP3/SLC7A5/ARID5A/CXCL3/CXCL1/PPP1R15B/SERPINE1/NFKBIZ/IL1B/TNFRSF1B/CSF3	17
BP	GO:0001819	positive regulation of cytokine production	23/208	499/18870	7.61201e-09	1.58049e-06	IL6/EGR1/MIR21/NR4A3/THBS1/IRF1/SLC7A5/ARID5A/BCL3/PTGS2/PNP/DDX21/ARRDC4/CD83/SPHK1/IL1RL1/SERPINE1/HMOX1/FADD/CYP1B1/CCL3/IL4R/IL1B	23
BP	GO:0071219	cellular response to molecule of bacterial origin	16/208	239/18870	9.97945e-09	1.91266e-06	IL6/CXCL2/MIR21/CCL2/ZFP36/CXCL8/TNFAIP3/SLC7A5/ARID5A/CXCL3/CXCL1/SERPINE1/NFKBIZ/IL1B/TNFRSF1B/CSF3	16
BP	GO:0046632	alpha-beta T cell differentiation	12/208	124/18870	1.2649e-08	2.25115e-06	IL6/SOCS3/MIR21/JUNB/IRF1/BCL3/PNP/FOSL2/CD83/GPR183/NFKBIZ/IL4R	12
BP	GO:0051384	response to glucocorticoid	12/208	127/18870	1.65928e-08	2.75615e-06	FOSB/IL6/CDKN1A/ZFP36/IL1RN/FOS/PTGS2/FOSL1/FOSL2/STC1/AREG/CYP1B1	12
BP	GO:0071347	cellular response to interleukin-1	11/208	111/18870	4.04885e-08	6.30502e-06	IL6/EGR1/MIR21/CCL2/IL1RN/CXCL8/HAS2/CCL8/HES1/CCL3/IL1B	11
BP	GO:0070555	response to interleukin-1	12/208	140/18870	4.96274e-08	7.27356e-06	IL6/EGR1/MIR21/CCL2/SELE/IL1RN/CXCL8/HAS2/CCL8/HES1/CCL3/IL1B	12
BP	GO:0030595	leukocyte chemotaxis	15/208	240/18870	7.27569e-08	1.00711e-05	CH25H/IL6/CXCL2/CCL2/THBS1/CXCL8/CCL8/CXCL3/TNFAIP6/CXCL1/GPR183/SERPINE1/DUSP1/CCL3/IL1B	15
BP	GO:0050900	leukocyte migration	19/208	396/18870	8.83336e-08	1.11156e-05	CH25H/IL6/CXCL2/CCL2/SELE/THBS1/CXCL8/ICAM1/CCL8/CXCL3/TNFAIP6/CXCL1/GPR183/SERPINE1/HMOX1/DUSP1/FADD/CCL3/IL1B	19
BP	GO:1903131	mononuclear cell differentiation	21/208	481/18870	8.92252e-08	1.11156e-05	IL6/EGR1/EGR3/SOCS3/MIR21/JUNB/MYC/IRF1/FOS/BCL3/NFIL3/PNP/FOSL2/CD83/GPR183/KLF6/FADD/INHBA/NFKBIZ/IL4R/IL1B	21
MF	GO:0005125	cytokine activity	15/212	237/18496	1.02396e-07	1.31139e-05	IL6/CXCL2/CCL2/IL1RN/NAMPT/CXCL8/LIF/CCL8/CXCL3/CXCL1/AREG/INHBA/CCL3/IL1B/CSF3	15
BP	GO:0048545	response to steroid hormone	17/208	330/18870	1.59076e-07	1.88739e-05	FOSB/IL6/NR4A3/CDKN1A/ZFP36/THBS1/IL1RN/FOS/PTGS2/FOSL1/FOSL2/STC1/AREG/SGK1/INHBA/CYP1B1/MGARP	17
BP	GO:2001236	regulation of extrinsic apoptotic signaling pathway	12/208	158/18870	1.88565e-07	2.13556e-05	THBS1/MCL1/ICAM1/TNFAIP3/ATF3/SERPINE1/HMOX1/FADD/TNFRSF12A/INHBA/IL1B/ITPRIP	12
BP	GO:0097191	extrinsic apoptotic signaling pathway	14/208	229/18870	2.63e-07	2.84907e-05	THBS1/MCL1/ICAM1/TNFAIP3/ATF3/SERPINE1/HMOX1/FADD/TNFRSF12A/INHBA/NFKBIZ/IL1B/TNFRSF1B/ITPRIP	14
BP	GO:0150077	regulation of neuroinflammatory response	7/208	41/18870	2.92393e-07	3.03188e-05	IL6/PTGS2/SPHK1/LDLR/CCL3/IL1B/TNFRSF1B	7
BP	GO:0030098	lymphocyte differentiation	19/208	429/18870	3.04213e-07	3.03188e-05	IL6/EGR1/EGR3/SOCS3/MIR21/JUNB/IRF1/BCL3/NFIL3/PNP/FOSL2/CD83/GPR183/KLF6/FADD/INHBA/NFKBIZ/IL4R/IL1B	19
BP	GO:0030217	T cell differentiation	16/208	307/18870	3.19134e-07	3.05826e-05	IL6/EGR1/EGR3/SOCS3/MIR21/JUNB/IRF1/BCL3/PNP/FOSL2/CD83/GPR183/FADD/NFKBIZ/IL4R/IL1B	16
BP	GO:0140467	integrated stress response signaling	7/208	42/18870	3.47612e-07	3.20604e-05	JUNB/CEBPD/FOS/FOSL1/PPP1R15B/JUN/PPP1R15A	7
BP	GO:0002573	myeloid leukocyte differentiation	14/208	235/18870	3.6029e-07	3.20604e-05	JUNB/MYC/LIF/FOS/FOSL2/TNFAIP6/KLF10/GPR183/IL1RL1/FADD/EPHA2/INHBA/CCL3/CSF3	14
BP	GO:0071356	cellular response to tumor necrosis factor	14/208	238/18870	4.20158e-07	3.60985e-05	CCL2/ZFP36/THBS1/CXCL8/HAS2/TNFAIP3/FOS/CCL8/SPHK1/HES1/BIRC3/CYP1B1/CCL3/TNFRSF1B	14
BP	GO:2001233	regulation of apoptotic signaling pathway	18/208	398/18870	4.66432e-07	3.76783e-05	NR4A2/MIR21/IER3/THBS1/MCL1/PLAUR/MYC/ICAM1/TNFAIP3/ATF3/PTGS2/SERPINE1/HMOX1/FADD/TNFRSF12A/INHBA/IL1B/ITPRIP	18
BP	GO:0000302	response to reactive oxygen species	13/208	205/18870	4.6879e-07	3.76783e-05	IL6/MIR21/TNFAIP3/FOS/FOSL1/SPHK1/AREG/PPP1R15B/JUN/HMOX1/GCH1/KDM6B/CYP1B1	13
BP	GO:0044703	multi-organism reproductive process	13/208	206/18870	4.95569e-07	3.85859e-05	FOSB/MIR21/MAFF/VMP1/JUNB/LIF/FOS/PTGS2/FOSL1/THBD/STC1/RGS2/IL1B	13
BP	GO:1902105	regulation of leukocyte differentiation	16/208	321/18870	5.79115e-07	4.37245e-05	EGR3/MIR21/JUNB/MYC/IRF1/LIF/FOS/PNP/TNFAIP6/CD83/KLF10/FADD/INHBA/NFKBIZ/CCL3/IL4R	16
MF	GO:0005126	cytokine receptor binding	15/212	273/18496	6.31938e-07	6.06993e-05	IL6/CXCL2/CCL2/IL1RN/CXCL8/LIF/CCL8/CXCL3/CXCL1/FADD/SOCS2/CCL3/CCRL2/IL1B/CSF3	15
BP	GO:0046631	alpha-beta T cell activation	12/208	181/18870	8.1623e-07	5.98147e-05	IL6/SOCS3/MIR21/JUNB/IRF1/BCL3/PNP/FOSL2/CD83/GPR183/NFKBIZ/IL4R	12
BP	GO:0044706	multi-multicellular organism process	13/208	216/18870	8.48817e-07	6.0425e-05	FOSB/MIR21/MAFF/VMP1/JUNB/LIF/FOS/PTGS2/FOSL1/THBD/STC1/RGS2/IL1B	13
BP	GO:0043367	CD4-positive, alpha-beta T cell differentiation	9/208	93/18870	8.73061e-07	6.0425e-05	IL6/SOCS3/MIR21/JUNB/BCL3/CD83/GPR183/NFKBIZ/IL4R	9
BP	GO:1903706	regulation of hemopoiesis	18/208	417/18870	9.15107e-07	6.16233e-05	EGR3/MIR21/ZFP36/JUNB/MYC/IRF1/LIF/FOS/PNP/TNFAIP6/CD83/KLF10/FADD/INHBA/NFKBIZ/CCL3/IL4R/CSF3	18
BP	GO:0007159	leukocyte cell-cell adhesion	18/208	419/18870	9.80093e-07	6.38388e-05	IL6/EGR3/MIR21/CCL2/NR4A3/SELE/HAS2/ICAM1/IRF1/PNP/KLF4/CD83/HES1/FADD/LRRC32/NFKBIZ/IL4R/IL1B	18
BP	GO:0050729	positive regulation of inflammatory response	11/208	152/18870	9.99252e-07	6.38388e-05	IL6/MIR21/PTGS2/GPR4/MIR22/LDLR/IL1RL1/SERPINE1/NFKBIZ/CCL3/IL1B	11
BP	GO:0007565	female pregnancy	12/208	186/18870	1.08991e-06	6.78902e-05	FOSB/MIR21/VMP1/JUNB/LIF/FOS/PTGS2/FOSL1/THBD/STC1/RGS2/IL1B	12
BP	GO:0002696	positive regulation of leukocyte activation	17/208	380/18870	1.14218e-06	6.92105e-05	IL6/EGR3/MIR21/CCL2/NR4A3/CDKN1A/THBS1/PNP/CD83/GPR183/IL1RL1/HES1/FADD/NFKBIZ/CCL3/IL4R/IL1B	17
BP	GO:0051917	regulation of fibrinolysis	5/208	18/18870	1.18235e-06	6.92105e-05	THBS1/PLAUR/THBD/PLAU/SERPINE1	5
BP	GO:1902041	regulation of extrinsic apoptotic signaling pathway via death domain receptors	7/208	50/18870	1.19444e-06	6.92105e-05	THBS1/ICAM1/TNFAIP3/ATF3/SERPINE1/HMOX1/ITPRIP	7
BP	GO:1903037	regulation of leukocyte cell-cell adhesion	17/208	382/18870	1.22726e-06	6.94958e-05	IL6/EGR3/MIR21/CCL2/NR4A3/SELE/HAS2/IRF1/PNP/KLF4/CD83/HES1/FADD/LRRC32/NFKBIZ/IL4R/IL1B	17
MF	GO:0008009	chemokine activity	7/212	49/18496	1.34404e-06	0.000103279	CXCL2/CCL2/CXCL8/CCL8/CXCL3/CXCL1/CCL3	7
BP	GO:0048661	positive regulation of smooth muscle cell proliferation	9/208	98/18870	1.36219e-06	7.50424e-05	IL6/MIR21/NR4A3/THBS1/ADAMTS1/PTGS2/HBEGF/JUN/HMOX1	9
BP	GO:0042093	T-helper cell differentiation	8/208	73/18870	1.38545e-06	7.50424e-05	IL6/SOCS3/MIR21/JUNB/BCL3/GPR183/NFKBIZ/IL4R	8
BP	GO:1990868	response to chemokine	9/208	99/18870	1.48425e-06	7.70443e-05	CXCL2/CCL2/CXCL8/CCL8/CXCL3/CXCL1/DUSP1/CCL3/CCRL2	9
BP	GO:1990869	cellular response to chemokine	9/208	99/18870	1.48425e-06	7.70443e-05	CXCL2/CCL2/CXCL8/CCL8/CXCL3/CXCL1/DUSP1/CCL3/CCRL2	9
BP	GO:0001704	formation of primary germ layer	10/208	128/18870	1.5627e-06	7.94608e-05	DUSP5/KLF4/ETS2/DUSP2/DUSP1/KDM6B/SOX17/SOX7/EPHA2/INHBA	10
BP	GO:0050673	epithelial cell proliferation	19/208	480/18870	1.64106e-06	8.17764e-05	IL6/EGR3/MIR21/CCL2/NR4A3/CDKN1A/ZFP36/THBS1/HAS2/MYC/TNFAIP3/NR4A1/AREG/MIR22/HMOX1/HES1/EPHA2/FST/NFKBIZ	19
BP	GO:0002294	CD4-positive, alpha-beta T cell differentiation involved in immune response	8/208	75/18870	1.7064e-06	8.25948e-05	IL6/SOCS3/MIR21/JUNB/BCL3/GPR183/NFKBIZ/IL4R	8
BP	GO:0045765	regulation of angiogenesis	16/208	349/18870	1.73726e-06	8.25948e-05	IL6/MIR21/THBS1/CXCL8/ADAMTS1/TNFAIP3/ADAMTS9/GPR4/KLF4/SPHK1/GADD45A/SERPINE1/HMOX1/EPHA2/CYP1B1/IL1B	16
BP	GO:0042542	response to hydrogen peroxide	9/208	101/18870	1.75693e-06	8.25948e-05	IL6/TNFAIP3/FOSL1/SPHK1/AREG/PPP1R15B/HMOX1/KDM6B/CYP1B1	9
BP	GO:0071621	granulocyte chemotaxis	10/208	130/18870	1.80048e-06	8.30749e-05	CXCL2/CCL2/THBS1/CXCL8/CCL8/CXCL3/TNFAIP6/CXCL1/CCL3/IL1B	10
BP	GO:0002287	alpha-beta T cell activation involved in immune response	8/208	76/18870	1.88927e-06	8.40585e-05	IL6/SOCS3/MIR21/JUNB/BCL3/GPR183/NFKBIZ/IL4R	8
BP	GO:0002293	alpha-beta T cell differentiation involved in immune response	8/208	76/18870	1.88927e-06	8.40585e-05	IL6/SOCS3/MIR21/JUNB/BCL3/GPR183/NFKBIZ/IL4R	8
BP	GO:0007369	gastrulation	12/208	197/18870	1.99471e-06	8.60209e-05	NR4A3/IL1RN/DUSP5/KLF4/ETS2/DUSP2/DUSP1/KDM6B/SOX17/SOX7/EPHA2/INHBA	12
BP	GO:0050867	positive regulation of cell activation	17/208	396/18870	2.00243e-06	8.60209e-05	IL6/EGR3/MIR21/CCL2/NR4A3/CDKN1A/THBS1/PNP/CD83/GPR183/IL1RL1/HES1/FADD/NFKBIZ/CCL3/IL4R/IL1B	17
MF	GO:0042379	chemokine receptor binding	8/212	74/18496	2.0561e-06	0.000131663	CXCL2/CCL2/CXCL8/CCL8/CXCL3/CXCL1/CCL3/CCRL2	8
BP	GO:1901342	regulation of vasculature development	16/208	354/18870	2.08885e-06	8.82126e-05	IL6/MIR21/THBS1/CXCL8/ADAMTS1/TNFAIP3/ADAMTS9/GPR4/KLF4/SPHK1/GADD45A/SERPINE1/HMOX1/EPHA2/CYP1B1/IL1B	16
BP	GO:1903039	positive regulation of leukocyte cell-cell adhesion	14/208	275/18870	2.345e-06	9.73793e-05	IL6/EGR3/MIR21/CCL2/NR4A3/SELE/HAS2/PNP/CD83/HES1/FADD/NFKBIZ/IL4R/IL1B	14
BP	GO:0022407	regulation of cell-cell adhesion	19/208	493/18870	2.42819e-06	9.9181e-05	IL6/EGR3/MIR21/CCL2/NR4A3/SELE/IL1RN/HAS2/PLAUR/IRF1/PNP/KLF4/CD83/HES1/FADD/LRRC32/NFKBIZ/IL4R/IL1B	19
BP	GO:0046425	regulation of receptor signaling pathway via JAK-STAT	9/208	106/18870	2.63472e-06	0.0001042	IL6/SOCS3/LIF/BCL3/GADD45A/HES1/SOCS2/CYP1B1/MST1	9
BP	GO:1990823	response to leukemia inhibitory factor	9/208	106/18870	2.63472e-06	0.0001042	SOCS3/ICAM1/MAT2A/FOSL2/KLF4/PIGA/SOX17/SPRY4/GFPT2	9
BP	GO:0051090	regulation of DNA-binding transcription factor activity	17/208	406/18870	2.80218e-06	0.000109091	IL6/SIK1/MIR21/PIM1/TNFAIP3/BCL3/KLF4/SPHK1/HMOX1/HES1/PPRC1/SGK1/BHLHE40/ABRA/CYP1B1/IL1B/CSF3	17
BP	GO:0030593	neutrophil chemotaxis	9/208	107/18870	2.84952e-06	0.000109228	CXCL2/CCL2/CXCL8/CCL8/CXCL3/TNFAIP6/CXCL1/CCL3/IL1B	9
BP	GO:0051385	response to mineralocorticoid	6/208	37/18870	2.91754e-06	0.000109767	FOSB/CDKN1A/FOS/FOSL1/SGK1/INHBA	6
BP	GO:0038066	p38MAPK cascade	7/208	57/18870	2.96191e-06	0.000109767	ZFP36/GADD45B/SPHK1/GADD45A/DUSP1/GADD45G/IL1B	7
BP	GO:0097529	myeloid leukocyte migration	13/208	242/18870	3.01472e-06	0.000109767	IL6/CXCL2/CCL2/THBS1/CXCL8/CCL8/CXCL3/TNFAIP6/CXCL1/SERPINE1/DUSP1/CCL3/IL1B	13
BP	GO:0022409	positive regulation of cell-cell adhesion	15/208	322/18870	3.0398e-06	0.000109767	IL6/EGR3/MIR21/CCL2/NR4A3/SELE/HAS2/PLAUR/PNP/CD83/HES1/FADD/NFKBIZ/IL4R/IL1B	15
BP	GO:2001234	negative regulation of apoptotic signaling pathway	13/208	243/18870	3.1546e-06	0.00010982	NR4A2/MIR21/IER3/THBS1/MCL1/PLAUR/ICAM1/TNFAIP3/PTGS2/SERPINE1/HMOX1/IL1B/ITPRIP	13
BP	GO:0030856	regulation of epithelial cell differentiation	11/208	171/18870	3.1735e-06	0.00010982	MIR21/MAFF/ZFP36/LIF/APOLD1/SERPINE1/HES1/ERRFI1/GRHL1/FST/IL1B	11
BP	GO:0048660	regulation of smooth muscle cell proliferation	11/208	171/18870	3.1735e-06	0.00010982	IL6/MIR21/NR4A3/CDKN1A/THBS1/ADAMTS1/TNFAIP3/PTGS2/HBEGF/JUN/HMOX1	11
MF	GO:0008330	protein tyrosine/threonine phosphatase activity	4/212	10/18496	3.33809e-06	0.000160316	DUSP5/DUSP2/DUSP1/DUSP6	4
MF	GO:0033550	MAP kinase tyrosine phosphatase activity	4/212	10/18496	3.33809e-06	0.000160316	DUSP5/DUSP2/DUSP1/DUSP6	4
BP	GO:0002819	regulation of adaptive immune response	12/208	208/18870	3.50863e-06	0.000119754	IL6/MIR21/JUNB/TNFAIP3/IRF1/ARID5A/IL1RL1/FADD/NFKBIZ/IL4R/IL1B/TNFRSF1B	12
BP	GO:0043616	keratinocyte proliferation	7/208	59/18870	3.75134e-06	0.000125356	MIR21/CDKN1A/ZFP36/HAS2/AREG/FST/NFKBIZ	7
BP	GO:0033002	muscle cell proliferation	13/208	247/18870	3.7734e-06	0.000125356	IL6/MIR21/NR4A3/CDKN1A/THBS1/ADAMTS1/PIM1/TNFAIP3/FOS/PTGS2/HBEGF/JUN/HMOX1	13
BP	GO:0048659	smooth muscle cell proliferation	11/208	175/18870	3.96906e-06	0.000130122	IL6/MIR21/NR4A3/CDKN1A/THBS1/ADAMTS1/TNFAIP3/PTGS2/HBEGF/JUN/HMOX1	11
BP	GO:0002292	T cell differentiation involved in immune response	8/208	84/18870	4.05108e-06	0.000131086	IL6/SOCS3/MIR21/JUNB/BCL3/GPR183/NFKBIZ/IL4R	8
BP	GO:0043409	negative regulation of MAPK cascade	11/208	176/18870	4.19331e-06	0.000133948	MIR21/DUSP5/MYC/LIF/ATF3/RGS2/DUSP2/DUSP1/DUSP6/SPRY4/IL1B	11
BP	GO:0008625	extrinsic apoptotic signaling pathway via death domain receptors	8/208	86/18870	4.83869e-06	0.000152607	THBS1/ICAM1/TNFAIP3/ATF3/SERPINE1/HMOX1/FADD/ITPRIP	8
BP	GO:0043030	regulation of macrophage activation	7/208	62/18870	5.25889e-06	0.000163787	IL6/THBS1/SPHK1/LDLR/IL1RL1/CCL3/IL4R	7
BP	GO:0048511	rhythmic process	14/208	296/18870	5.49726e-06	0.000169097	EGR1/SIK1/EGR3/NAMPT/ADAMTS1/HAS2/PTX3/NFIL3/TNFAIP6/CREM/KLF10/BHLHE40/INHBA/CYP1B1	14
BP	GO:0043434	response to peptide hormone	17/208	430/18870	6.01365e-06	0.000182726	EGR1/SOCS3/NR4A2/NR4A3/EGR2/FOS/PTGS2/NR4A1/AREG/BTG2/INSIG1/CA2/SOCS2/INHBA/CYP1B1/MGARP/IL1B	17
BP	GO:0070482	response to oxygen levels	15/208	343/18870	6.53594e-06	0.000196202	EGR1/NR4A2/MIR21/CDKN1A/THBS1/MYC/SLC7A5/LIF/FOS/PTGS2/FOSL2/STC1/PLAU/HMOX1/MGARP	15
BP	GO:0035710	CD4-positive, alpha-beta T cell activation	9/208	119/18870	6.86014e-06	0.000201089	IL6/SOCS3/MIR21/JUNB/BCL3/CD83/GPR183/NFKBIZ/IL4R	9
BP	GO:1904892	regulation of receptor signaling pathway via STAT	9/208	119/18870	6.86014e-06	0.000201089	IL6/SOCS3/LIF/BCL3/GADD45A/HES1/SOCS2/CYP1B1/MST1	9
BP	GO:0070098	chemokine-mediated signaling pathway	8/208	91/18870	7.39397e-06	0.000214217	CXCL2/CCL2/CXCL8/CCL8/CXCL3/CXCL1/CCL3/CCRL2	8
MF	GO:0035259	nuclear glucocorticoid receptor binding	4/212	12/18496	7.7277e-06	0.000329896	NR4A2/NR4A3/NR4A1/ETS2	4
BP	GO:0034605	cellular response to heat	7/208	66/18870	8.02338e-06	0.00022978	CDKN1A/THBS1/PTGS2/HMOX1/HSPA6/DNAJB1/IER5	7
BP	GO:0070661	leukocyte proliferation	15/208	350/18870	8.32354e-06	0.000235668	IL6/MIR21/CDKN1A/JUNB/TNFAIP3/IRF1/PNP/FOSL2/GPR183/HES1/FADD/LRRC32/NFKBIZ/IL1B/TNFRSF1B	15
BP	GO:0002286	T cell activation involved in immune response	9/208	123/18870	8.98615e-06	0.00025157	IL6/SOCS3/MIR21/JUNB/ICAM1/BCL3/GPR183/NFKBIZ/IL4R	9
BP	GO:0097530	granulocyte migration	10/208	156/18870	9.24136e-06	0.00025584	CXCL2/CCL2/THBS1/CXCL8/CCL8/CXCL3/TNFAIP6/CXCL1/CCL3/IL1B	10
BP	GO:0051918	negative regulation of fibrinolysis	4/208	13/18870	9.48629e-06	0.000257246	THBS1/THBD/PLAU/SERPINE1	4
BP	GO:1900744	regulation of p38MAPK cascade	6/208	45/18870	9.49866e-06	0.000257246	GADD45B/SPHK1/GADD45A/DUSP1/GADD45G/IL1B	6
BP	GO:0002685	regulation of leukocyte migration	12/208	230/18870	9.79501e-06	0.00026242	IL6/CCL2/SELE/THBS1/CXCL8/ICAM1/TNFAIP6/SERPINE1/HMOX1/DUSP1/FADD/CCL3	12
BP	GO:0002822	regulation of adaptive immune response based on somatic recombination of immune receptors built from immunoglobulin superfamily domains	11/208	193/18870	1.01109e-05	0.000268	IL6/MIR21/JUNB/TNFAIP3/ARID5A/IL1RL1/FADD/NFKBIZ/IL4R/IL1B/TNFRSF1B	11
BP	GO:0042730	fibrinolysis	5/208	27/18870	1.0276e-05	0.00026951	THBS1/PLAUR/THBD/PLAU/SERPINE1	5
MF	GO:0017017	MAP kinase tyrosine/serine/threonine phosphatase activity	4/212	13/18496	1.10621e-05	0.000425016	DUSP5/DUSP2/DUSP1/DUSP6	4
BP	GO:0046683	response to organophosphorus	9/208	127/18870	1.16518e-05	0.000302411	FOSB/FOS/PTGS2/FOSL1/THBD/STC1/AREG/CYP1B1/IL1B	9
BP	GO:0072538	T-helper 17 type immune response	6/208	47/18870	1.22946e-05	0.000315803	IL6/SOCS3/MIR21/JUNB/ARID5A/NFKBIZ	6
BP	GO:0042698	ovulation cycle	7/208	71/18870	1.30783e-05	0.00032939	EGR1/ADAMTS1/HAS2/PTX3/TNFAIP6/INHBA/CYP1B1	7
BP	GO:0051412	response to corticosterone	4/208	14/18870	1.31663e-05	0.00032939	FOSB/CDKN1A/FOS/FOSL1	4
BP	GO:1990266	neutrophil migration	9/208	129/18870	1.32201e-05	0.00032939	CXCL2/CCL2/CXCL8/CCL8/CXCL3/TNFAIP6/CXCL1/CCL3/IL1B	9
BP	GO:2001237	negative regulation of extrinsic apoptotic signaling pathway	8/208	99/18870	1.38153e-05	0.000340096	THBS1/MCL1/ICAM1/TNFAIP3/SERPINE1/HMOX1/IL1B/ITPRIP	8
BP	GO:0042088	T-helper 1 type immune response	6/208	48/18870	1.39228e-05	0.000340096	ARID5A/BCL3/IL1RL1/NFKBIZ/IL4R/IL1B	6
BP	GO:0014015	positive regulation of gliogenesis	7/208	72/18870	1.43526e-05	0.00034719	IL6/EGR2/SLC7A5/LIF/HES1/IL1B/TNFRSF1B	7
BP	GO:0006809	nitric oxide biosynthetic process	7/208	73/18870	1.57279e-05	0.000373212	PTX3/PTGS2/KLF4/GCH1/GLA/CYP1B1/IL1B	7
BP	GO:0035914	skeletal muscle cell differentiation	7/208	73/18870	1.57279e-05	0.000373212	EGR1/MAFF/EGR2/FOS/ATF3/NR4A1/BTG2	7
BP	GO:0043542	endothelial cell migration	13/208	284/18870	1.69277e-05	0.000397894	EGR3/MIR21/THBS1/PTGS2/ADAMTS9/NR4A1/KLF4/STC1/GADD45A/MIR22/HMOX1/EPHA2/CYP1B1	13
BP	GO:0010631	epithelial cell migration	15/208	372/18870	1.71055e-05	0.000398314	EGR3/MIR21/THBS1/HAS2/PTGS2/ADAMTS9/HBEGF/NR4A1/KLF4/STC1/GADD45A/MIR22/HMOX1/EPHA2/CYP1B1	15
BP	GO:0009913	epidermal cell differentiation	12/208	245/18870	1.84337e-05	0.00042527	MAFF/CDKN1A/ZFP36/FOSL2/KLF4/UGCG/HES1/ERRFI1/GRHL1/EPHA2/NFKBIZ/PPL	12
BP	GO:0090132	epithelium migration	15/208	375/18870	1.87886e-05	0.000429479	EGR3/MIR21/THBS1/HAS2/PTGS2/ADAMTS9/HBEGF/NR4A1/KLF4/STC1/GADD45A/MIR22/HMOX1/EPHA2/CYP1B1	15
BP	GO:0071674	mononuclear cell migration	11/208	207/18870	1.94908e-05	0.000441173	CH25H/IL6/CCL2/THBS1/ICAM1/CCL8/GPR183/SERPINE1/DUSP1/FADD/CCL3	11
BP	GO:0032642	regulation of chemokine production	8/208	104/18870	1.98313e-05	0.000441173	IL6/EGR1/KLF4/IL1RL1/HMOX1/EPHA2/IL4R/IL1B	8
BP	GO:1990830	cellular response to leukemia inhibitory factor	8/208	104/18870	1.98313e-05	0.000441173	SOCS3/ICAM1/MAT2A/KLF4/PIGA/SOX17/SPRY4/GFPT2	8
BP	GO:1900745	positive regulation of p38MAPK cascade	5/208	31/18870	2.08662e-05	0.000456051	GADD45B/SPHK1/GADD45A/GADD45G/IL1B	5
BP	GO:1902042	negative regulation of extrinsic apoptotic signaling pathway via death domain receptors	5/208	31/18870	2.08662e-05	0.000456051	ICAM1/TNFAIP3/SERPINE1/HMOX1/ITPRIP	5
BP	GO:0032602	chemokine production	8/208	105/18870	2.12662e-05	0.000460751	IL6/EGR1/KLF4/IL1RL1/HMOX1/EPHA2/IL4R/IL1B	8
BP	GO:0090130	tissue migration	15/208	380/18870	2.19213e-05	0.000467552	EGR3/MIR21/THBS1/HAS2/PTGS2/ADAMTS9/HBEGF/NR4A1/KLF4/STC1/GADD45A/MIR22/HMOX1/EPHA2/CYP1B1	15
BP	GO:1902895	positive regulation of miRNA transcription	6/208	52/18870	2.22672e-05	0.000467552	EGR1/MYC/FOS/FOSL1/KLF4/JUN	6
BP	GO:0050863	regulation of T cell activation	15/208	381/18870	2.26006e-05	0.000467552	IL6/EGR3/MIR21/CCL2/JUNB/IRF1/PNP/CD83/HES1/FADD/LRRC32/NFKBIZ/IL4R/IL1B/TNFRSF1B	15
BP	GO:0010212	response to ionizing radiation	9/208	138/18870	2.27028e-05	0.000467552	EGR1/MIR21/CDKN1A/SPIDR/MYC/THBD/GADD45A/DCUN1D3/NABP1	9
BP	GO:1903034	regulation of response to wounding	10/208	173/18870	2.27729e-05	0.000467552	MIR21/THBS1/PLAUR/TNFAIP3/HBEGF/THBD/KLF4/PLAU/SERPINE1/TNFRSF12A	10
BP	GO:0030316	osteoclast differentiation	8/208	106/18870	2.27871e-05	0.000467552	JUNB/FOS/FOSL2/TNFAIP6/KLF10/GPR183/EPHA2/CCL3	8
BP	GO:0070371	ERK1 and ERK2 cascade	14/208	336/18870	2.28937e-05	0.000467552	MIR21/CCL2/DUSP5/MYC/ICAM1/LIF/CCL8/ATF3/GPR183/EPHA2/DUSP6/INHBA/CCL3/IL1B	14
BP	GO:0007259	receptor signaling pathway via JAK-STAT	10/208	174/18870	2.39325e-05	0.000484795	IL6/SOCS3/CCL2/LIF/BCL3/GADD45A/HES1/SOCS2/CYP1B1/MST1	10
BP	GO:0046209	nitric oxide metabolic process	7/208	78/18870	2.43437e-05	0.000488545	PTX3/PTGS2/KLF4/GCH1/GLA/CYP1B1/IL1B	7
BP	GO:0070498	interleukin-1-mediated signaling pathway	5/208	32/18870	2.45098e-05	0.000488545	IL6/EGR1/MIR21/IL1RN/IL1B	5
BP	GO:0043086	negative regulation of catalytic activity	17/208	480/18870	2.48941e-05	0.000492266	MIR21/CDKN1A/ZFP36/THBS1/PLAUR/PTX3/GPRC5A/KLF4/GADD45A/RGS2/PPP1R15A/SERPINE1/ERRFI1/DUSP1/GLA/SPRY4/IL1B	17
BP	GO:0009612	response to mechanical stimulus	11/208	213/18870	2.53964e-05	0.000493641	FOSB/THBS1/IRF1/FOS/PTGS2/FOSL1/GADD45A/BTG2/FADD/PPL/IL1B	11
BP	GO:0008544	epidermis development	15/208	385/18870	2.55075e-05	0.000493641	MAFF/CDKN1A/ZFP36/FOSL2/KLF4/UGCG/HES1/EMP1/ERRFI1/GRHL1/EPHA2/INHBA/FST/NFKBIZ/PPL	15
BP	GO:0032102	negative regulation of response to external stimulus	17/208	481/18870	2.5558e-05	0.000493641	SOCS3/MIR21/CCL2/IER3/ZFP36/THBS1/PLAUR/TNFAIP3/THBD/TNFAIP6/KLF4/PLAU/LDLR/SERPINE1/DUSP1/METRNL/TNFRSF1B	17
BP	GO:2001057	reactive nitrogen species metabolic process	7/208	79/18870	2.64634e-05	0.000507198	PTX3/PTGS2/KLF4/GCH1/GLA/CYP1B1/IL1B	7
BP	GO:0001666	response to hypoxia	13/208	298/18870	2.80254e-05	0.000533035	EGR1/NR4A2/MIR21/THBS1/MYC/LIF/FOS/PTGS2/FOSL2/STC1/PLAU/HMOX1/MGARP	13
BP	GO:0072539	T-helper 17 cell differentiation	5/208	33/18870	2.86291e-05	0.000540391	IL6/SOCS3/MIR21/JUNB/NFKBIZ	5
BP	GO:0014013	regulation of gliogenesis	8/208	110/18870	2.98156e-05	0.000554387	IL6/EGR2/SLC7A5/LIF/LDLR/HES1/IL1B/TNFRSF1B	8
BP	GO:0042116	macrophage activation	8/208	110/18870	2.98156e-05	0.000554387	IL6/THBS1/SPHK1/LDLR/IL1RL1/CD93/CCL3/IL4R	8
BP	GO:0014074	response to purine-containing compound	9/208	143/18870	3.01138e-05	0.000555784	FOSB/FOS/PTGS2/FOSL1/THBD/STC1/AREG/CYP1B1/IL1B	9
BP	GO:1904019	epithelial cell apoptotic process	9/208	144/18870	3.18188e-05	0.000582934	IL6/CCL2/ZFP36/THBS1/ICAM1/TNFAIP3/SERPINE1/HMOX1/NFKBIZ	9
BP	GO:0043534	blood vessel endothelial cell migration	10/208	181/18870	3.35617e-05	0.000609412	EGR3/THBS1/PTGS2/NR4A1/KLF4/GADD45A/MIR22/HMOX1/EPHA2/CYP1B1	10
BP	GO:0150076	neuroinflammatory response	7/208	82/18870	3.37532e-05	0.000609412	IL6/PTGS2/SPHK1/LDLR/CCL3/IL1B/TNFRSF1B	7
BP	GO:0001503	ossification	16/208	444/18870	3.52441e-05	0.000627239	IL6/MIR21/JUNB/EGR2/CEBPD/PTGS2/DDX21/FOSL2/TNFAIP6/STC1/KLF10/CHSY1/AREG/EPHA2/SGMS2/CCL3	16
BP	GO:0010720	positive regulation of cell development	16/208	444/18870	3.52441e-05	0.000627239	IL6/EGR3/MIR21/EGR2/SLC7A5/LIF/FOS/PNP/CD83/KLF10/HES1/FADD/NFKBIZ/IL4R/IL1B/TNFRSF1B	16
BP	GO:1904035	regulation of epithelial cell apoptotic process	8/208	113/18870	3.62051e-05	0.000639772	IL6/CCL2/ZFP36/THBS1/ICAM1/TNFAIP3/SERPINE1/HMOX1	8
BP	GO:0046651	lymphocyte proliferation	13/208	307/18870	3.81397e-05	0.000669212	IL6/MIR21/CDKN1A/IRF1/PNP/FOSL2/GPR183/HES1/FADD/LRRC32/NFKBIZ/IL1B/TNFRSF1B	13
BP	GO:0001667	ameboidal-type cell migration	17/208	497/18870	3.8549e-05	0.000671663	EGR3/MIR21/THBS1/HAS2/PTGS2/ADAMTS9/HBEGF/NR4A1/KLF4/STC1/GADD45A/MIR22/HMOX1/SOX17/HAS1/EPHA2/CYP1B1	17
BP	GO:0010755	regulation of plasminogen activation	4/208	18/18870	3.88788e-05	0.000672706	THBS1/PLAUR/PLAU/SERPINE1	4
BP	GO:0006979	response to oxidative stress	15/208	400/18870	3.95692e-05	0.00067993	IL6/NR4A2/MIR21/TNFAIP3/FOS/PTGS2/FOSL1/SPHK1/AREG/PPP1R15B/JUN/HMOX1/GCH1/KDM6B/CYP1B1	15
BP	GO:1902107	positive regulation of leukocyte differentiation	10/208	185/18870	4.0426e-05	0.000685202	EGR3/MIR21/LIF/FOS/PNP/CD83/KLF10/FADD/NFKBIZ/IL4R	10
BP	GO:1903708	positive regulation of hemopoiesis	10/208	185/18870	4.0426e-05	0.000685202	EGR3/MIR21/LIF/FOS/PNP/CD83/KLF10/FADD/NFKBIZ/IL4R	10
BP	GO:0001706	endoderm formation	6/208	58/18870	4.19049e-05	0.000705468	DUSP5/DUSP2/DUSP1/SOX17/SOX7/INHBA	6
BP	GO:0051591	response to cAMP	7/208	85/18870	4.2618e-05	0.000711889	FOSB/FOS/FOSL1/THBD/STC1/AREG/CYP1B1	7
BP	GO:0070663	regulation of leukocyte proliferation	12/208	267/18870	4.28577e-05	0.000711889	IL6/MIR21/CDKN1A/TNFAIP3/IRF1/PNP/GPR183/HES1/FADD/LRRC32/IL1B/TNFRSF1B	12
BP	GO:0016525	negative regulation of angiogenesis	9/208	150/18870	4.38638e-05	0.000723776	MIR21/THBS1/ADAMTS1/ADAMTS9/GPR4/KLF4/GADD45A/SERPINE1/EPHA2	9
MF	GO:0033549	MAP kinase phosphatase activity	4/212	18/18496	4.52581e-05	0.00144905	DUSP5/DUSP2/DUSP1/DUSP6	4
MF	GO:0045236	CXCR chemokine receptor binding	4/212	18/18496	4.52581e-05	0.00144905	CXCL2/CXCL8/CXCL3/CXCL1	4
BP	GO:0031638	zymogen activation	6/208	59/18870	4.62241e-05	0.00075449	THBS1/PLAUR/THBD/PLAU/SERPINE1/FADD	6
BP	GO:0097696	receptor signaling pathway via STAT	10/208	188/18870	4.63308e-05	0.00075449	IL6/SOCS3/CCL2/LIF/BCL3/GADD45A/HES1/SOCS2/CYP1B1/MST1	10
BP	GO:0032943	mononuclear cell proliferation	13/208	314/18870	4.80797e-05	0.000777885	IL6/MIR21/CDKN1A/IRF1/PNP/FOSL2/GPR183/HES1/FADD/LRRC32/NFKBIZ/IL1B/TNFRSF1B	13
BP	GO:2000181	negative regulation of blood vessel morphogenesis	9/208	152/18870	4.86505e-05	0.000782042	MIR21/THBS1/ADAMTS1/ADAMTS9/GPR4/KLF4/GADD45A/SERPINE1/EPHA2	9
BP	GO:0036293	response to decreased oxygen levels	13/208	315/18870	4.96695e-05	0.000793304	EGR1/NR4A2/MIR21/THBS1/MYC/LIF/FOS/PTGS2/FOSL2/STC1/PLAU/HMOX1/MGARP	13
BP	GO:0002040	sprouting angiogenesis	10/208	190/18870	5.06636e-05	0.000802391	EGR3/MIR21/THBS1/PTGS2/ADAMTS9/NR4A1/KLF4/MIR22/HMOX1/EPHA2	10
BP	GO:0007566	embryo implantation	6/208	60/18870	5.08926e-05	0.000802391	MIR21/VMP1/LIF/PTGS2/STC1/IL1B	6
BP	GO:1901343	negative regulation of vasculature development	9/208	153/18870	5.12046e-05	0.000802391	MIR21/THBS1/ADAMTS1/ADAMTS9/GPR4/KLF4/GADD45A/SERPINE1/EPHA2	9
BP	GO:0034614	cellular response to reactive oxygen species	9/208	154/18870	5.38709e-05	0.000838898	IL6/MIR21/TNFAIP3/FOS/SPHK1/JUN/GCH1/KDM6B/CYP1B1	9
BP	GO:0014910	regulation of smooth muscle cell migration	7/208	89/18870	5.73248e-05	0.000887138	MIR21/NR4A3/ADAMTS1/HAS2/PLAU/SERPINE1/CYP1B1	7
BP	GO:1903978	regulation of microglial cell activation	4/208	20/18870	6.05027e-05	0.000930539	IL6/SPHK1/LDLR/CCL3	4
BP	GO:0071774	response to fibroblast growth factor	8/208	123/18870	6.63395e-05	0.00101405	EGR3/CCL2/ZFP36/THBS1/CXCL8/IER2/NR4A1/SPRY4	8
BP	GO:0050670	regulation of lymphocyte proliferation	11/208	238/18870	6.97151e-05	0.00105915	IL6/MIR21/CDKN1A/IRF1/PNP/GPR183/HES1/FADD/LRRC32/IL1B/TNFRSF1B	11
BP	GO:0002761	regulation of myeloid leukocyte differentiation	8/208	124/18870	7.02527e-05	0.00106085	MYC/LIF/FOS/TNFAIP6/KLF10/FADD/INHBA/CCL3	8
BP	GO:0030336	negative regulation of cell migration	14/208	373/18870	7.11308e-05	0.00106764	MIR21/CCL2/THBS1/ADAMTS9/TNFAIP6/KLF4/STC1/GADD45A/MIR22/SERPINE1/HMOX1/DUSP1/HAS1/CYP1B1	14
BP	GO:2000630	positive regulation of miRNA metabolic process	6/208	64/18870	7.34794e-05	0.00109271	EGR1/MYC/FOS/FOSL1/KLF4/JUN	6
BP	GO:0071498	cellular response to fluid shear stress	4/208	21/18870	7.40955e-05	0.00109271	HAS2/PTGS2/KLF4/TFPI2	4
BP	GO:0042060	wound healing	15/208	423/18870	7.43974e-05	0.00109271	IL6/CDKN1A/THBS1/PLAUR/TNFAIP3/HBEGF/THBD/GPR4/PLAU/SERPINE1/HMOX1/TFPI2/TNFRSF12A/PPL/DGKD	15
BP	GO:0032570	response to progesterone	5/208	40/18870	7.45555e-05	0.00109271	FOSB/THBS1/FOS/FOSL1/CYP1B1	5
BP	GO:0002688	regulation of leukocyte chemotaxis	8/208	126/18870	7.86559e-05	0.00114607	IL6/CCL2/THBS1/CXCL8/TNFAIP6/SERPINE1/DUSP1/CCL3	8
BP	GO:0051251	positive regulation of lymphocyte activation	13/208	330/18870	7.96406e-05	0.00115367	IL6/EGR3/MIR21/CCL2/CDKN1A/PNP/CD83/GPR183/HES1/FADD/NFKBIZ/IL4R/IL1B	13
BP	GO:0032944	regulation of mononuclear cell proliferation	11/208	242/18870	8.09217e-05	0.00116545	IL6/MIR21/CDKN1A/IRF1/PNP/GPR183/HES1/FADD/LRRC32/IL1B/TNFRSF1B	11
BP	GO:0010721	negative regulation of cell development	12/208	287/18870	8.56838e-05	0.00122694	IL6/MIR21/MYC/IRF1/TNFAIP6/LDLR/BTG2/HES1/INHBA/CCL3/IL4R/IL1B	12
BP	GO:0002460	adaptive immune response based on somatic recombination of immune receptors built from immunoglobulin superfamily domains	14/208	380/18870	8.6662e-05	0.00123386	IL6/SOCS3/MIR21/JUNB/ICAM1/TNFAIP3/ARID5A/BCL3/IL1RL1/FADD/NFKBIZ/IL4R/IL1B/TNFRSF1B	14
BP	GO:0031349	positive regulation of defense response	16/208	480/18870	8.84817e-05	0.00125029	IL6/MIR21/TNFAIP3/IRF1/PTGS2/FOSL1/GPR4/MIR22/LDLR/IL1RL1/SERPINE1/FADD/BIRC3/NFKBIZ/CCL3/IL1B	16
BP	GO:0001818	negative regulation of cytokine production	14/208	381/18870	8.91058e-05	0.00125029	IL6/MIR21/ZFP36/THBS1/TNFAIP3/BCL3/KLF4/CD83/IL1RL1/REL/LRRC32/EPHA2/INHBA/MIR155	14
BP	GO:0030099	myeloid cell differentiation	15/208	430/18870	8.93214e-05	0.00125029	ZFP36/JUNB/MYC/LIF/FOS/FOSL2/TNFAIP6/KLF10/GPR183/IL1RL1/FADD/EPHA2/INHBA/CCL3/CSF3	15
BP	GO:0045785	positive regulation of cell adhesion	16/208	482/18870	9.28583e-05	0.00127923	IL6/EGR3/MIR21/CCL2/NR4A3/SELE/HAS2/PLAUR/LIF/PNP/CD83/HES1/FADD/NFKBIZ/IL4R/IL1B	16
BP	GO:0002042	cell migration involved in sprouting angiogenesis	7/208	96/18870	9.29295e-05	0.00127923	EGR3/THBS1/PTGS2/NR4A1/KLF4/MIR22/HMOX1	7
BP	GO:0014909	smooth muscle cell migration	7/208	96/18870	9.29295e-05	0.00127923	MIR21/NR4A3/ADAMTS1/HAS2/PLAU/SERPINE1/CYP1B1	7
BP	GO:0016032	viral process	15/208	432/18870	9.40396e-05	0.0012874	CH25H/CCL2/ZFP36/CXCL8/PTX3/ICAM1/CCL8/CHD1/JUN/LDLR/ISG20/EPHA2/VPS37B/CCL3/SLPI	15
CC	GO:0090575	RNA polymerase II transcription regulator complex	11/213	254/19886	9.71587e-05	0.0158703	MAFF/JUNB/MYC/CEBPD/FOS/ATF3/NFIL3/FOSL1/FOSL2/CREM/JUN	11
BP	GO:0043433	negative regulation of DNA-binding transcription factor activity	9/208	167/18870	0.000100681	0.00137079	SIK1/MIR21/PIM1/TNFAIP3/BCL3/KLF4/HES1/BHLHE40/CYP1B1	9
BP	GO:2000146	negative regulation of cell motility	14/208	388/18870	0.000107956	0.00146185	MIR21/CCL2/THBS1/ADAMTS9/TNFAIP6/KLF4/STC1/GADD45A/MIR22/SERPINE1/HMOX1/DUSP1/HAS1/CYP1B1	14
BP	GO:0010632	regulation of epithelial cell migration	12/208	295/18870	0.000111089	0.00149614	MIR21/THBS1/HAS2/PTGS2/ADAMTS9/HBEGF/KLF4/STC1/GADD45A/MIR22/HMOX1/EPHA2	12
BP	GO:0050870	positive regulation of T cell activation	11/208	251/18870	0.000111899	0.00149896	IL6/EGR3/MIR21/CCL2/PNP/CD83/HES1/FADD/NFKBIZ/IL4R/IL1B	11
BP	GO:0010596	negative regulation of endothelial cell migration	7/208	99/18870	0.000112885	0.00150408	MIR21/THBS1/ADAMTS9/KLF4/STC1/GADD45A/MIR22	7
BP	GO:0061041	regulation of wound healing	8/208	133/18870	0.000114914	0.00152296	THBS1/PLAUR/TNFAIP3/HBEGF/THBD/PLAU/SERPINE1/TNFRSF12A	8
BP	GO:1902893	regulation of miRNA transcription	6/208	70/18870	0.00012165	0.00160371	EGR1/MYC/FOS/FOSL1/KLF4/JUN	6
BP	GO:0097305	response to alcohol	11/208	254/18870	0.000124253	0.0016294	FOSB/CDKN1A/SPIDR/FOS/FOSL1/RGS2/SGK1/INHBA/CYP1B1/CCL3/CSF3	11
BP	GO:0071496	cellular response to external stimulus	13/208	346/18870	0.000127805	0.0016672	NR4A2/CDKN1A/PIM1/IRF1/SLC7A5/FOS/ATF3/PTGS2/FOSL1/KLF10/GADD45A/FADD/IL1B	13
BP	GO:0034599	cellular response to oxidative stress	11/208	255/18870	0.000128621	0.00166911	IL6/NR4A2/MIR21/TNFAIP3/FOS/SPHK1/JUN/HMOX1/GCH1/KDM6B/CYP1B1	11
MF	GO:0140297	DNA-binding transcription factor binding	16/212	477/18496	0.000129288	0.00382107	SIK1/NR4A2/NR4A3/EGR2/MYC/ARID5A/FOS/BCL3/NR4A1/KLF4/CREM/ETS2/JUN/HES1/SOX17/BHLHE40	16
BP	GO:0045637	regulation of myeloid cell differentiation	10/208	213/18870	0.000131058	0.00168242	ZFP36/MYC/LIF/FOS/TNFAIP6/KLF10/FADD/INHBA/CCL3/CSF3	10
BP	GO:0002548	monocyte chemotaxis	6/208	71/18870	0.000131672	0.00168242	IL6/CCL2/CCL8/SERPINE1/DUSP1/CCL3	6
BP	GO:0061614	miRNA transcription	6/208	71/18870	0.000131672	0.00168242	EGR1/MYC/FOS/FOSL1/KLF4/JUN	6
BP	GO:0014823	response to activity	6/208	72/18870	0.000142337	0.00179341	IL6/SLC7A5/FOS/SLC25A25/KDM6B/METRNL	6
BP	GO:0032722	positive regulation of chemokine production	6/208	72/18870	0.000142337	0.00179341	IL6/EGR1/IL1RL1/HMOX1/IL4R/IL1B	6
BP	GO:0006959	humoral immune response	11/208	258/18870	0.000142518	0.00179341	IL6/CXCL2/CCL2/CXCL8/BCL3/CXCL3/CXCL1/CD83/GPR183/SLPI/IL1B	11
BP	GO:0009408	response to heat	7/208	103/18870	0.000144775	0.00181266	CDKN1A/THBS1/PTGS2/HMOX1/HSPA6/DNAJB1/IER5	7
BP	GO:2000659	regulation of interleukin-1-mediated signaling pathway	3/208	10/18870	0.000149623	0.00186399	IL6/MIR21/IL1RN	3
BP	GO:0046697	decidualization	4/208	25/18870	0.000151292	0.00187541	JUNB/LIF/PTGS2/STC1	4
BP	GO:0030216	keratinocyte differentiation	9/208	177/18870	0.000156573	0.00193126	CDKN1A/ZFP36/FOSL2/UGCG/ERRFI1/GRHL1/EPHA2/NFKBIZ/PPL	9
BP	GO:0046637	regulation of alpha-beta T cell differentiation	6/208	74/18870	0.000165717	0.00203397	MIR21/JUNB/PNP/CD83/NFKBIZ/IL4R	6
BP	GO:0071375	cellular response to peptide hormone stimulus	12/208	310/18870	0.000176431	0.00215486	SOCS3/NR4A2/NR4A3/FOS/NR4A1/INSIG1/CA2/SOCS2/INHBA/CYP1B1/MGARP/IL1B	12
BP	GO:0050678	regulation of epithelial cell proliferation	14/208	407/18870	0.000177568	0.00215816	EGR3/MIR21/CCL2/NR4A3/ZFP36/THBS1/HAS2/MYC/TNFAIP3/NR4A1/AREG/MIR22/HMOX1/HES1	14
BP	GO:0030195	negative regulation of blood coagulation	5/208	48/18870	0.000180636	0.0021848	THBS1/PLAUR/THBD/PLAU/SERPINE1	5
BP	GO:0007173	epidermal growth factor receptor signaling pathway	7/208	107/18870	0.000183606	0.00220999	MIR21/PLAUR/GPRC5A/HBEGF/AREG/ERRFI1/DGKD	7
BP	GO:0007162	negative regulation of cell adhesion	12/208	312/18870	0.000187232	0.00224281	MIR21/THBS1/IL1RN/IRF1/RND1/KLF4/SERPINE1/DUSP1/LRRC32/CYP1B1/SPRY4/IL4R	12
CC	GO:1905370	serine-type endopeptidase complex	3/213	11/19886	0.000187638	0.0158703	PLAUR/THBD/PLAU	3
BP	GO:0070372	regulation of ERK1 and ERK2 cascade	12/208	313/18870	0.000192841	0.00229018	MIR21/CCL2/ICAM1/LIF/CCL8/ATF3/GPR183/EPHA2/DUSP6/INHBA/CCL3/IL1B	12
BP	GO:0042129	regulation of T cell proliferation	9/208	182/18870	0.000193025	0.00229018	IL6/MIR21/IRF1/PNP/HES1/FADD/LRRC32/IL1B/TNFRSF1B	9
BP	GO:0014911	positive regulation of smooth muscle cell migration	5/208	49/18870	0.000199376	0.00233221	MIR21/NR4A3/ADAMTS1/HAS2/CYP1B1	5
BP	GO:0033628	regulation of cell adhesion mediated by integrin	5/208	49/18870	0.000199376	0.00233221	LIF/PLAU/SERPINE1/EPHA2/CYP1B1	5
BP	GO:1900047	negative regulation of hemostasis	5/208	49/18870	0.000199376	0.00233221	THBS1/PLAUR/THBD/PLAU/SERPINE1	5
BP	GO:0031639	plasminogen activation	4/208	27/18870	0.000206305	0.00238049	THBS1/PLAUR/PLAU/SERPINE1	4
BP	GO:0032740	positive regulation of interleukin-17 production	4/208	27/18870	0.000206305	0.00238049	IL6/SLC7A5/ARID5A/SPHK1	4
BP	GO:1903036	positive regulation of response to wounding	6/208	77/18870	0.00020637	0.00238049	MIR21/THBS1/HBEGF/THBD/PLAU/SERPINE1	6
BP	GO:0050671	positive regulation of lymphocyte proliferation	8/208	145/18870	0.000208716	0.00239646	IL6/MIR21/CDKN1A/PNP/GPR183/HES1/FADD/IL1B	8
BP	GO:0043588	skin development	12/208	317/18870	0.000216737	0.0024442	CDKN1A/ZFP36/FOSL2/KLF4/UGCG/ERRFI1/GRHL1/EPHA2/INHBA/FST/NFKBIZ/PPL	12
BP	GO:0062197	cellular response to chemical stress	12/208	317/18870	0.000216737	0.0024442	IL6/NR4A2/MIR21/TNFAIP3/FOS/PTGS2/SPHK1/JUN/HMOX1/GCH1/KDM6B/CYP1B1	12
BP	GO:0014812	muscle cell migration	7/208	110/18870	0.000217926	0.0024442	MIR21/NR4A3/ADAMTS1/HAS2/PLAU/SERPINE1/CYP1B1	7
BP	GO:0045766	positive regulation of angiogenesis	9/208	185/18870	0.000218103	0.0024442	MIR21/THBS1/CXCL8/KLF4/SPHK1/SERPINE1/HMOX1/CYP1B1/IL1B	9
BP	GO:1904018	positive regulation of vasculature development	9/208	185/18870	0.000218103	0.0024442	MIR21/THBS1/CXCL8/KLF4/SPHK1/SERPINE1/HMOX1/CYP1B1/IL1B	9
BP	GO:0045598	regulation of fat cell differentiation	8/208	146/18870	0.000218759	0.0024442	IL6/MIR21/ZFP36/PIM1/PTGS2/HES1/INSIG1/METRNL	8
BP	GO:0071456	cellular response to hypoxia	8/208	147/18870	0.000229195	0.00254066	EGR1/MIR21/MYC/FOS/PTGS2/STC1/HMOX1/MGARP	8
BP	GO:0097193	intrinsic apoptotic signaling pathway	12/208	319/18870	0.000229603	0.00254066	MIR21/CDKN1A/IER3/MCL1/PLAUR/MYC/BCL3/PTGS2/PPP1R15A/EPHA2/CYP1B1/TNFRSF1B	12
BP	GO:1902106	negative regulation of leukocyte differentiation	7/208	111/18870	0.000230452	0.00254066	MIR21/MYC/IRF1/TNFAIP6/INHBA/CCL3/IL4R	7
BP	GO:0045685	regulation of glial cell differentiation	6/208	79/18870	0.000237572	0.00258499	IL6/EGR2/LIF/LDLR/HES1/TNFRSF1B	6
BP	GO:0030194	positive regulation of blood coagulation	4/208	28/18870	0.000238623	0.00258499	THBS1/THBD/PLAU/SERPINE1	4
BP	GO:0090594	inflammatory response to wounding	4/208	28/18870	0.000238623	0.00258499	IL6/MIR21/HMOX1/NFKBIZ	4
BP	GO:1900048	positive regulation of hemostasis	4/208	28/18870	0.000238623	0.00258499	THBS1/THBD/PLAU/SERPINE1	4
BP	GO:0032946	positive regulation of mononuclear cell proliferation	8/208	148/18870	0.000240036	0.00258904	IL6/MIR21/CDKN1A/PNP/GPR183/HES1/FADD/IL1B	8
BP	GO:0010332	response to gamma radiation	5/208	51/18870	0.000241267	0.0025911	EGR1/MIR21/CDKN1A/MYC/DCUN1D3	5
BP	GO:0002687	positive regulation of leukocyte migration	8/208	149/18870	0.000251293	0.0026872	IL6/SELE/THBS1/CXCL8/ICAM1/SERPINE1/FADD/CCL3	8
BP	GO:0010594	regulation of endothelial cell migration	10/208	231/18870	0.000252886	0.00269267	MIR21/THBS1/PTGS2/ADAMTS9/KLF4/STC1/GADD45A/MIR22/HMOX1/EPHA2	10
BP	GO:0043410	positive regulation of MAPK cascade	15/208	474/18870	0.000257896	0.00273433	IL6/MIR21/CCL2/THBS1/ICAM1/LIF/CCL8/GADD45B/SPHK1/GADD45A/GPR183/INHBA/CCL3/GADD45G/IL1B	15
BP	GO:0040013	negative regulation of locomotion	14/208	423/18870	0.000263453	0.00276968	MIR21/CCL2/THBS1/ADAMTS9/TNFAIP6/KLF4/STC1/GADD45A/MIR22/SERPINE1/HMOX1/DUSP1/HAS1/CYP1B1	14
BP	GO:0046638	positive regulation of alpha-beta T cell differentiation	5/208	52/18870	0.000264565	0.00276968	MIR21/PNP/CD83/NFKBIZ/IL4R	5
BP	GO:0050819	negative regulation of coagulation	5/208	52/18870	0.000264565	0.00276968	THBS1/PLAUR/THBD/PLAU/SERPINE1	5
BP	GO:0002720	positive regulation of cytokine production involved in immune response	6/208	81/18870	0.000272372	0.00283725	IL6/NR4A3/SLC7A5/ARID5A/DDX21/IL1B	6
BP	GO:1901653	cellular response to peptide	13/208	374/18870	0.000273297	0.00283725	SOCS3/NR4A2/NR4A3/ICAM1/FOS/NR4A1/INSIG1/CA2/SOCS2/INHBA/CYP1B1/MGARP/IL1B	13
BP	GO:0044344	cellular response to fibroblast growth factor stimulus	7/208	115/18870	0.000286488	0.00294445	EGR3/CCL2/ZFP36/THBS1/CXCL8/NR4A1/SPRY4	7
BP	GO:0045936	negative regulation of phosphate metabolic process	13/208	376/18870	0.000287675	0.00294445	SOCS3/CDKN1A/GPRC5A/GADD45A/RGS2/PPP1R15B/PPP1R15A/ERRFI1/DUSP1/DUSP6/INHBA/SPRY4/IL1B	13
BP	GO:0042326	negative regulation of phosphorylation	12/208	327/18870	0.000287782	0.00294445	SOCS3/CDKN1A/GPRC5A/GADD45A/RGS2/PPP1R15B/ERRFI1/DUSP1/DUSP6/INHBA/SPRY4/IL1B	12
BP	GO:0048146	positive regulation of fibroblast proliferation	5/208	53/18870	0.000289532	0.00294445	CDKN1A/MYC/LIF/FOSL2/SPHK1	5
BP	GO:2001238	positive regulation of extrinsic apoptotic signaling pathway	5/208	53/18870	0.000289532	0.00294445	THBS1/ATF3/FADD/TNFRSF12A/INHBA	5
BP	GO:0010563	negative regulation of phosphorus metabolic process	13/208	377/18870	0.000295104	0.00298892	SOCS3/CDKN1A/GPRC5A/GADD45A/RGS2/PPP1R15B/PPP1R15A/ERRFI1/DUSP1/DUSP6/INHBA/SPRY4/IL1B	13
BP	GO:0010633	negative regulation of epithelial cell migration	7/208	116/18870	0.00030208	0.00303491	MIR21/THBS1/ADAMTS9/KLF4/STC1/GADD45A/MIR22	7
BP	GO:0046634	regulation of alpha-beta T cell activation	7/208	116/18870	0.00030208	0.00303491	MIR21/JUNB/IRF1/PNP/CD83/NFKBIZ/IL4R	7
MF	GO:0035497	cAMP response element binding	3/212	12/18496	0.000302619	0.00830496	NR4A3/CREB5/JUN	3
BP	GO:0007492	endoderm development	6/208	83/18870	0.000311057	0.00310389	DUSP5/DUSP2/DUSP1/SOX17/SOX7/INHBA	6
BP	GO:0010575	positive regulation of vascular endothelial growth factor production	4/208	30/18870	0.00031393	0.00310389	IL6/PTGS2/CYP1B1/IL1B	4
BP	GO:0043032	positive regulation of macrophage activation	4/208	30/18870	0.00031393	0.00310389	THBS1/IL1RL1/CCL3/IL4R	4
BP	GO:0050820	positive regulation of coagulation	4/208	30/18870	0.00031393	0.00310389	THBS1/THBD/PLAU/SERPINE1	4
CC	GO:1905286	serine-type peptidase complex	3/213	13/19886	0.000320129	0.0158703	PLAUR/THBD/PLAU	3
BP	GO:0060537	muscle tissue development	14/208	433/18870	0.000333581	0.00327626	EGR1/SIK1/MAFF/EGR2/PIM1/FOS/ATF3/ADAMTS9/FOSL2/NR4A1/RGS2/BTG2/KDM6B/TIPARP	14
BP	GO:0043500	muscle adaptation	7/208	118/18870	0.000335308	0.00327626	MIR21/NR4A3/RGS2/HMOX1/LMCD1/IL1B/TNFRSF1B	7
BP	GO:1903707	negative regulation of hemopoiesis	7/208	118/18870	0.000335308	0.00327626	MIR21/MYC/IRF1/TNFAIP6/INHBA/CCL3/IL4R	7
CC	GO:0042581	specific granule	8/213	160/19886	0.000336911	0.0158703	SLC2A3/PLAUR/PTX3/CXCL1/PLAU/CD93/SLPI/TNFRSF1B	8
BP	GO:0070486	leukocyte aggregation	3/208	13/18870	0.000347989	0.00337371	NR4A3/HAS2/IL1B	3
BP	GO:0072683	T cell extravasation	3/208	13/18870	0.000347989	0.00337371	CCL2/ICAM1/FADD	3
BP	GO:0032609	type II interferon production	7/208	119/18870	0.000352987	0.00339537	SLC7A5/ARID5A/BCL3/IL1RL1/FADD/INHBA/IL1B	7
BP	GO:0032649	regulation of type II interferon production	7/208	119/18870	0.000352987	0.00339537	SLC7A5/ARID5A/BCL3/IL1RL1/FADD/INHBA/IL1B	7
BP	GO:0002274	myeloid leukocyte activation	10/208	241/18870	0.000354312	0.00339537	IL6/NR4A3/THBS1/CXCL8/SPHK1/LDLR/IL1RL1/CD93/CCL3/IL4R	10
BP	GO:0002825	regulation of T-helper 1 type immune response	4/208	31/18870	0.000357347	0.00339831	ARID5A/IL1RL1/IL4R/IL1B	4
BP	GO:0060674	placenta blood vessel development	4/208	31/18870	0.000357347	0.00339831	SOCS3/JUNB/FOSL1/HES1	4
BP	GO:0031400	negative regulation of protein modification process	14/208	437/18870	0.000365812	0.00346558	SOCS3/CDKN1A/TNFAIP3/GPRC5A/GADD45A/RGS2/PPP1R15B/DCUN1D3/PPP1R15A/ERRFI1/DUSP1/DUSP6/SPRY4/IL1B	14
BP	GO:0002718	regulation of cytokine production involved in immune response	7/208	120/18870	0.000371405	0.00350524	IL6/NR4A3/SLC7A5/ARID5A/DDX21/IL1B/TNFRSF1B	7
BP	GO:0036294	cellular response to decreased oxygen levels	8/208	158/18870	0.000373432	0.00351108	EGR1/MIR21/MYC/FOS/PTGS2/STC1/HMOX1/MGARP	8
BP	GO:0043370	regulation of CD4-positive, alpha-beta T cell differentiation	5/208	56/18870	0.000375231	0.0035116	MIR21/JUNB/CD83/NFKBIZ/IL4R	5
BP	GO:2000628	regulation of miRNA metabolic process	6/208	86/18870	0.000377019	0.0035116	EGR1/MYC/FOS/FOSL1/KLF4/JUN	6
BP	GO:0062012	regulation of small molecule metabolic process	12/208	337/18870	0.000377716	0.0035116	CH25H/EGR1/SIK1/MIR21/NR4A3/IER3/PTGS2/LDLR/INSIG1/RDH10/MST1/IL1B	12
BP	GO:0042063	gliogenesis	12/208	338/18870	0.000387892	0.0035928	IL6/CCL2/EGR2/SLC7A5/LIF/AREG/GPR183/LDLR/HES1/CCL3/IL1B/TNFRSF1B	12
BP	GO:0035966	response to topologically incorrect protein	8/208	159/18870	0.000389559	0.00359488	THBS1/ATF3/PPP1R15B/PPP1R15A/KLHL15/HSPA6/DNAJB1/KBTBD6	8
BP	GO:0002697	regulation of immune effector process	13/208	389/18870	0.000397845	0.00365779	IL6/MIR21/NR4A3/JUNB/ICAM1/SLC7A5/ARID5A/DDX21/FADD/NFKBIZ/IL4R/IL1B/TNFRSF1B	13
BP	GO:0002313	mature B cell differentiation involved in immune response	4/208	32/18870	0.000404895	0.00368185	IL6/BCL3/GPR183/NFKBIZ	4
BP	GO:0048710	regulation of astrocyte differentiation	4/208	32/18870	0.000404895	0.00368185	IL6/LIF/LDLR/HES1	4
BP	GO:2000316	regulation of T-helper 17 type immune response	4/208	32/18870	0.000404895	0.00368185	MIR21/JUNB/ARID5A/NFKBIZ	4
BP	GO:0061900	glial cell activation	5/208	57/18870	0.000407665	0.00369356	IL6/SPHK1/LDLR/CCL3/IL1B	5
BP	GO:0002367	cytokine production involved in immune response	7/208	122/18870	0.000410548	0.0037062	IL6/NR4A3/SLC7A5/ARID5A/DDX21/IL1B/TNFRSF1B	7
BP	GO:0050728	negative regulation of inflammatory response	9/208	202/18870	0.00041688	0.00374978	SOCS3/IER3/ZFP36/TNFAIP3/TNFAIP6/KLF4/LDLR/METRNL/TNFRSF1B	9
BP	GO:0033627	cell adhesion mediated by integrin	6/208	88/18870	0.000426739	0.00382465	ICAM1/LIF/PLAU/SERPINE1/EPHA2/CYP1B1	6
BP	GO:0030213	hyaluronan biosynthetic process	3/208	14/18870	0.000439304	0.00390915	HAS2/HAS1/IL1B	3
BP	GO:0070262	peptidyl-serine dephosphorylation	3/208	14/18870	0.000439304	0.00390915	PPP1R15B/PPP1R15A/DUSP1	3
BP	GO:0045428	regulation of nitric oxide biosynthetic process	5/208	58/18870	0.000442171	0.00392065	PTX3/PTGS2/KLF4/GLA/IL1B	5
BP	GO:0045930	negative regulation of mitotic cell cycle	10/208	248/18870	0.000443875	0.00392181	MIR21/CCL2/CDKN1A/IER3/KLF4/DCUN1D3/BTG2/DUSP1/INHBA/NABP1	10
BP	GO:0038127	ERBB signaling pathway	7/208	124/18870	0.000452921	0.00395187	MIR21/PLAUR/GPRC5A/HBEGF/AREG/ERRFI1/DGKD	7
BP	GO:0045446	endothelial cell differentiation	7/208	124/18870	0.000452921	0.00395187	MIR21/ICAM1/APOLD1/STC1/KDM6B/SOX17/IL1B	7
BP	GO:0072676	lymphocyte migration	7/208	124/18870	0.000452921	0.00395187	CH25H/CCL2/ICAM1/CCL8/GPR183/FADD/CCL3	7
BP	GO:0043618	regulation of transcription from RNA polymerase II promoter in response to stress	4/208	33/18870	0.000456794	0.00395187	EGR1/ATF3/JUN/HMOX1	4
BP	GO:0061436	establishment of skin barrier	4/208	33/18870	0.000456794	0.00395187	KLF4/UGCG/GRHL1/NFKBIZ	4
BP	GO:0090279	regulation of calcium ion import	4/208	33/18870	0.000456794	0.00395187	CCL2/STC1/HES1/CCL3	4
BP	GO:0014009	glial cell proliferation	5/208	59/18870	0.000478833	0.00411396	IL6/SLC7A5/AREG/HES1/IL1B	5
BP	GO:0060135	maternal process involved in female pregnancy	5/208	59/18870	0.000478833	0.00411396	JUNB/LIF/PTGS2/STC1/RGS2	5
BP	GO:0060021	roof of mouth development	6/208	91/18870	0.000510751	0.00434979	CSRNP1/INSIG1/TIPARP/LRRC32/INHBA/BNC2	6
BP	GO:0030212	hyaluronan metabolic process	4/208	34/18870	0.000513264	0.00434979	HAS2/TNFAIP6/HAS1/IL1B	4
BP	GO:0034405	response to fluid shear stress	4/208	34/18870	0.000513264	0.00434979	HAS2/PTGS2/KLF4/TFPI2	4
BP	GO:0043372	positive regulation of CD4-positive, alpha-beta T cell differentiation	4/208	34/18870	0.000513264	0.00434979	MIR21/CD83/NFKBIZ/IL4R	4
BP	GO:0045604	regulation of epidermal cell differentiation	5/208	60/18870	0.000517736	0.00435425	MAFF/ZFP36/HES1/ERRFI1/GRHL1	5
BP	GO:0080164	regulation of nitric oxide metabolic process	5/208	60/18870	0.000517736	0.00435425	PTX3/PTGS2/KLF4/GLA/IL1B	5
BP	GO:0070665	positive regulation of leukocyte proliferation	8/208	166/18870	0.000519033	0.00435425	IL6/MIR21/CDKN1A/PNP/GPR183/HES1/FADD/IL1B	8
BP	GO:0002366	leukocyte activation involved in immune response	11/208	301/18870	0.000531904	0.00444725	IL6/SOCS3/MIR21/NR4A3/JUNB/ICAM1/BCL3/GPR183/NFKBIZ/CCL3/IL4R	11
BP	GO:0140747	regulation of ncRNA transcription	6/208	92/18870	0.000541439	0.00449376	EGR1/MYC/FOS/FOSL1/KLF4/JUN	6
BP	GO:0010838	positive regulation of keratinocyte proliferation	3/208	15/18870	0.000544681	0.00449376	MIR21/HAS2/AREG	3
BP	GO:0044849	estrous cycle	3/208	15/18870	0.000544681	0.00449376	EGR1/HAS2/CYP1B1	3
BP	GO:0090280	positive regulation of calcium ion import	3/208	15/18870	0.000544681	0.00449376	CCL2/STC1/CCL3	3
BP	GO:2000351	regulation of endothelial cell apoptotic process	5/208	61/18870	0.000558969	0.00459642	CCL2/THBS1/ICAM1/TNFAIP3/SERPINE1	5
BP	GO:0002456	T cell mediated immunity	7/208	129/18870	0.00057425	0.00469339	IL6/ICAM1/ARID5A/FADD/NFKBIZ/IL1B/TNFRSF1B	7
BP	GO:0001893	maternal placenta development	4/208	35/18870	0.000574529	0.00469339	JUNB/LIF/PTGS2/STC1	4
BP	GO:0001933	negative regulation of protein phosphorylation	11/208	304/18870	0.000577575	0.00470286	SOCS3/CDKN1A/GPRC5A/GADD45A/RGS2/PPP1R15B/ERRFI1/DUSP1/DUSP6/SPRY4/IL1B	11
BP	GO:0001649	osteoblast differentiation	10/208	257/18870	0.000585963	0.00475562	IL6/MIR21/JUNB/CEBPD/DDX21/FOSL2/TNFAIP6/AREG/EPHA2/CCL3	10
BP	GO:0045619	regulation of lymphocyte differentiation	9/208	212/18870	0.000591201	0.00478254	EGR3/MIR21/JUNB/IRF1/PNP/CD83/INHBA/NFKBIZ/IL4R	9
BP	GO:0002263	cell activation involved in immune response	11/208	305/18870	0.000593508	0.00478567	IL6/SOCS3/MIR21/NR4A3/JUNB/ICAM1/BCL3/GPR183/NFKBIZ/CCL3/IL4R	11
BP	GO:0090303	positive regulation of wound healing	5/208	62/18870	0.000602619	0.00483683	THBS1/HBEGF/THBD/PLAU/SERPINE1	5
BP	GO:0009636	response to toxic substance	10/208	258/18870	0.000603844	0.00483683	MIR21/CDKN1A/PIM1/FOS/PTGS2/GCH1/KDM6B/CYP1B1/MT2A/CCL3	10
BP	GO:0001656	metanephros development	6/208	94/18870	0.000607104	0.00483683	EGR1/MYC/LIF/HES1/SOX17/RDH10	6
BP	GO:0045786	negative regulation of cell cycle	13/208	407/18870	0.000608228	0.00483683	MIR21/CCL2/CDKN1A/IER3/LIF/PTGS2/NR4A1/KLF4/DCUN1D3/BTG2/DUSP1/INHBA/NABP1	13
BP	GO:0002285	lymphocyte activation involved in immune response	9/208	213/18870	0.000611501	0.00483683	IL6/SOCS3/MIR21/JUNB/ICAM1/BCL3/GPR183/NFKBIZ/IL4R	9
BP	GO:0042098	T cell proliferation	9/208	213/18870	0.000611501	0.00483683	IL6/MIR21/IRF1/PNP/HES1/FADD/LRRC32/IL1B/TNFRSF1B	9
BP	GO:0009266	response to temperature stimulus	8/208	171/18870	0.000631305	0.00497768	CDKN1A/THBS1/PTGS2/HMOX1/HSPA6/DNAJB1/IER5/METRNL	8
MF	GO:0061629	RNA polymerase II-specific DNA-binding transcription factor binding	12/212	344/18496	0.000640789	0.0164132	NR4A2/NR4A3/EGR2/ARID5A/FOS/NR4A1/KLF4/ETS2/JUN/HES1/SOX17/BHLHE40	12
BP	GO:0032623	interleukin-2 production	5/208	63/18870	0.000648776	0.00506732	ZFP36/TNFAIP3/PNP/CD83/IL1B	5
BP	GO:0032663	regulation of interleukin-2 production	5/208	63/18870	0.000648776	0.00506732	ZFP36/TNFAIP3/PNP/CD83/IL1B	5
BP	GO:0042058	regulation of epidermal growth factor receptor signaling pathway	5/208	63/18870	0.000648776	0.00506732	MIR21/PLAUR/GPRC5A/ERRFI1/DGKD	5
BP	GO:0090336	positive regulation of brown fat cell differentiation	3/208	16/18870	0.000664947	0.00516127	PIM1/PTGS2/METRNL	3
BP	GO:2000318	positive regulation of T-helper 17 type immune response	3/208	16/18870	0.000664947	0.00516127	MIR21/ARID5A/NFKBIZ	3
BP	GO:0030225	macrophage differentiation	5/208	64/18870	0.000697529	0.00538065	LIF/FOSL2/IL1RL1/FADD/INHBA	5
BP	GO:0048247	lymphocyte chemotaxis	5/208	64/18870	0.000697529	0.00538065	CH25H/CCL2/CCL8/GPR183/CCL3	5
BP	GO:0071453	cellular response to oxygen levels	8/208	174/18870	0.000707574	0.00544129	EGR1/MIR21/MYC/FOS/PTGS2/STC1/HMOX1/MGARP	8
BP	GO:0071276	cellular response to cadmium ion	4/208	37/18870	0.000712336	0.00546105	FOS/JUN/HMOX1/MT2A	4
BP	GO:0050679	positive regulation of epithelial cell proliferation	9/208	218/18870	0.000721752	0.00551627	EGR3/MIR21/NR4A3/HAS2/MYC/TNFAIP3/NR4A1/AREG/HMOX1	9
BP	GO:0001822	kidney development	11/208	314/18870	0.000754142	0.00574619	EGR1/ADAMTS1/HAS2/MYC/LIF/GPR4/HES1/FADD/TIPARP/SOX17/RDH10	11
MF	GO:0019207	kinase regulator activity	10/212	256/18496	0.000767129	0.0184212	SOCS3/CDKN1A/GPRC5A/HBEGF/CCNL1/AREG/SOCS2/CKS2/SPRY4/ITPRIP	10
BP	GO:0002702	positive regulation of production of molecular mediator of immune response	7/208	136/18870	0.000786071	0.00592372	IL6/NR4A3/SLC7A5/ARID5A/DDX21/IL4R/IL1B	7
BP	GO:0002335	mature B cell differentiation	4/208	38/18870	0.000789328	0.00592372	IL6/BCL3/GPR183/NFKBIZ	4
BP	GO:0002369	T cell cytokine production	4/208	38/18870	0.000789328	0.00592372	IL6/ARID5A/IL1B/TNFRSF1B	4
BP	GO:0002724	regulation of T cell cytokine production	4/208	38/18870	0.000789328	0.00592372	IL6/ARID5A/IL1B/TNFRSF1B	4
BP	GO:0045429	positive regulation of nitric oxide biosynthetic process	4/208	38/18870	0.000789328	0.00592372	PTX3/PTGS2/KLF4/IL1B	4
BP	GO:0090399	replicative senescence	3/208	17/18870	0.000800899	0.00595604	MIR21/CDKN1A/SERPINE1	3
BP	GO:0097396	response to interleukin-17	3/208	17/18870	0.000800899	0.00595604	SOCS3/NFKBIZ/IL1B	3
BP	GO:0097398	cellular response to interleukin-17	3/208	17/18870	0.000800899	0.00595604	SOCS3/NFKBIZ/IL1B	3
BP	GO:0045682	regulation of epidermis development	5/208	66/18870	0.000803197	0.00595604	MAFF/ZFP36/HES1/ERRFI1/GRHL1	5
BP	GO:0060538	skeletal muscle organ development	8/208	178/18870	0.000820642	0.00605052	EGR1/MAFF/EGR2/FOS/ATF3/NR4A1/BTG2/DISP1	8
BP	GO:0006986	response to unfolded protein	7/208	137/18870	0.000820795	0.00605052	THBS1/ATF3/PPP1R15B/PPP1R15A/HSPA6/DNAJB1/KBTBD6	7
BP	GO:0071901	negative regulation of protein serine/threonine kinase activity	6/208	100/18870	0.000841686	0.00618622	CDKN1A/GADD45A/RGS2/DUSP1/SPRY4/IL1B	6
BP	GO:0006469	negative regulation of protein kinase activity	8/208	179/18870	0.000851063	0.00623109	CDKN1A/GPRC5A/GADD45A/RGS2/ERRFI1/DUSP1/SPRY4/IL1B	8
BP	GO:0002699	positive regulation of immune effector process	10/208	270/18870	0.000856003	0.00623109	IL6/MIR21/NR4A3/SLC7A5/ARID5A/DDX21/FADD/NFKBIZ/IL4R/IL1B	10
BP	GO:0010611	regulation of cardiac muscle hypertrophy	5/208	67/18870	0.000860296	0.00623109	MIR21/NR4A3/RGS2/LMCD1/TNFRSF1B	5
BP	GO:0070301	cellular response to hydrogen peroxide	5/208	67/18870	0.000860296	0.00623109	IL6/TNFAIP3/SPHK1/KDM6B/CYP1B1	5
BP	GO:0072577	endothelial cell apoptotic process	5/208	67/18870	0.000860296	0.00623109	CCL2/THBS1/ICAM1/TNFAIP3/SERPINE1	5
BP	GO:0043620	regulation of DNA-templated transcription in response to stress	4/208	39/18870	0.000872015	0.00627946	EGR1/ATF3/JUN/HMOX1	4
BP	GO:1904407	positive regulation of nitric oxide metabolic process	4/208	39/18870	0.000872015	0.00627946	PTX3/PTGS2/KLF4/IL1B	4
BP	GO:0008585	female gonad development	6/208	101/18870	0.00088676	0.00636724	ADAMTS1/PTX3/TNFAIP6/TIPARP/INHBA/FST	6
BP	GO:0019058	viral life cycle	11/208	321/18870	0.000902735	0.00644577	CH25H/CCL2/CXCL8/PTX3/ICAM1/CCL8/LDLR/ISG20/EPHA2/VPS37B/SLPI	11
BP	GO:0051348	negative regulation of transferase activity	9/208	225/18870	0.000902871	0.00644577	CDKN1A/ZFP36/GPRC5A/GADD45A/RGS2/ERRFI1/DUSP1/SPRY4/IL1B	9
BP	GO:0045580	regulation of T cell differentiation	8/208	181/18870	0.000914622	0.00651101	EGR3/MIR21/JUNB/IRF1/PNP/CD83/NFKBIZ/IL4R	8
BP	GO:0030193	regulation of blood coagulation	5/208	68/18870	0.000920366	0.00653323	THBS1/PLAUR/THBD/PLAU/SERPINE1	5
BP	GO:0044403	biological process involved in symbiotic interaction	11/208	322/18870	0.000925818	0.00655326	CH25H/CXCL8/PTX3/ICAM1/CCL8/CHD1/JUN/LDLR/EPHA2/VPS37B/CCL3	11
BP	GO:0008630	intrinsic apoptotic signaling pathway in response to DNA damage	6/208	102/18870	0.00093367	0.00659012	CDKN1A/IER3/MCL1/BCL3/EPHA2/TNFRSF1B	6
BP	GO:0150078	positive regulation of neuroinflammatory response	3/208	18/18870	0.000953303	0.00669079	IL6/CCL3/IL1B	3
BP	GO:1904044	response to aldosterone	3/208	18/18870	0.000953303	0.00669079	CDKN1A/SGK1/INHBA	3
BP	GO:0009314	response to radiation	13/208	428/18870	0.000965785	0.00675935	EGR1/SIK1/MIR21/CDKN1A/SPIDR/MYC/FOS/BCL3/THBD/GADD45A/DCUN1D3/BHLHE40/NABP1	13
BP	GO:0072001	renal system development	11/208	324/18870	0.000973452	0.00679393	EGR1/ADAMTS1/HAS2/MYC/LIF/GPR4/HES1/FADD/TIPARP/SOX17/RDH10	11
BP	GO:0032677	regulation of interleukin-8 production	6/208	103/18870	0.000982468	0.00680686	IL6/BCL3/KLF4/SERPINE1/FADD/IL1B	6
BP	GO:0045639	positive regulation of myeloid cell differentiation	6/208	103/18870	0.000982468	0.00680686	LIF/FOS/KLF10/FADD/INHBA/CSF3	6
BP	GO:0035019	somatic stem cell population maintenance	5/208	69/18870	0.0009835	0.00680686	MYC/LIF/KLF4/KLF10/HES1	5
CC	GO:0009897	external side of plasma membrane	12/213	387/19886	0.000995514	0.0375151	SELE/THBS1/PLAUR/ICAM1/SLC7A5/THBD/CD83/PLAU/LDLR/IL1RL1/CCRL2/IL4R	12
BP	GO:0071241	cellular response to inorganic substance	9/208	229/18870	0.00102193	0.00705323	FOSB/SPIDR/JUNB/FOS/PTGS2/JUN/HMOX1/ITPKC/MT2A	9
BP	GO:0032637	interleukin-8 production	6/208	104/18870	0.0010332	0.00711134	IL6/BCL3/KLF4/SERPINE1/FADD/IL1B	6
BP	GO:0014743	regulation of muscle hypertrophy	5/208	70/18870	0.0010498	0.00712624	MIR21/NR4A3/RGS2/LMCD1/TNFRSF1B	5
BP	GO:0071479	cellular response to ionizing radiation	5/208	70/18870	0.0010498	0.00712624	EGR1/MIR21/CDKN1A/SPIDR/GADD45A	5
BP	GO:1900046	regulation of hemostasis	5/208	70/18870	0.0010498	0.00712624	THBS1/PLAUR/THBD/PLAU/SERPINE1	5
BP	GO:1901184	regulation of ERBB signaling pathway	5/208	70/18870	0.0010498	0.00712624	MIR21/PLAUR/GPRC5A/ERRFI1/DGKD	5
BP	GO:0060251	regulation of glial cell proliferation	4/208	41/18870	0.00105537	0.00712624	IL6/SLC7A5/HES1/IL1B	4
BP	GO:1904994	regulation of leukocyte adhesion to vascular endothelial cell	4/208	41/18870	0.00105537	0.00712624	IL6/MIR21/SELE/KLF4	4
BP	GO:0003158	endothelium development	7/208	143/18870	0.00105539	0.00712624	MIR21/ICAM1/APOLD1/STC1/KDM6B/SOX17/IL1B	7
BP	GO:0010586	miRNA metabolic process	6/208	105/18870	0.00108593	0.00724409	EGR1/MYC/FOS/FOSL1/KLF4/JUN	6
BP	GO:0042102	positive regulation of T cell proliferation	6/208	105/18870	0.00108593	0.00724409	IL6/MIR21/PNP/HES1/FADD/IL1B	6
BP	GO:0046545	development of primary female sexual characteristics	6/208	105/18870	0.00108593	0.00724409	ADAMTS1/PTX3/TNFAIP6/TIPARP/INHBA/FST	6
BP	GO:0050730	regulation of peptidyl-tyrosine phosphorylation	9/208	231/18870	0.00108606	0.00724409	IL6/SOCS3/LIF/GPRC5A/HBEGF/AREG/HES1/ERRFI1/CSF3	9
BP	GO:0032640	tumor necrosis factor production	8/208	186/18870	0.00109029	0.00724409	IL6/ZFP36/THBS1/TNFAIP3/ARID5A/BCL3/FADD/CCL3	8
BP	GO:0032680	regulation of tumor necrosis factor production	8/208	186/18870	0.00109029	0.00724409	IL6/ZFP36/THBS1/TNFAIP3/ARID5A/BCL3/FADD/CCL3	8
BP	GO:0009410	response to xenobiotic stimulus	13/208	434/18870	0.00109556	0.00725979	FOSB/CDKN1A/THBS1/MYC/FOS/PTGS2/PNP/FOSL1/FOSL2/DUSP6/NFKBIZ/CYP1B1/IL1B	13
BP	GO:0010565	regulation of cellular ketone metabolic process	7/208	144/18870	0.00109914	0.00726419	EGR1/MIR21/NR4A3/PTGS2/INSIG1/RDH10/IL1B	7
BP	GO:0050920	regulation of chemotaxis	9/208	232/18870	0.00111933	0.00734325	IL6/CCL2/THBS1/CXCL8/TNFAIP6/GPR183/SERPINE1/DUSP1/CCL3	9
BP	GO:0045600	positive regulation of fat cell differentiation	5/208	71/18870	0.00111935	0.00734325	MIR21/ZFP36/PIM1/PTGS2/METRNL	5
BP	GO:0002544	chronic inflammatory response	3/208	19/18870	0.00112289	0.00734325	THBS1/TNFAIP3/NFKBIZ	3
BP	GO:0035743	CD4-positive, alpha-beta T cell cytokine production	3/208	19/18870	0.00112289	0.00734325	IL6/ARID5A/IL1B	3
BP	GO:2001235	positive regulation of apoptotic signaling pathway	7/208	145/18870	0.00114431	0.00746371	THBS1/MCL1/MYC/ATF3/FADD/TNFRSF12A/INHBA	7
BP	GO:0001709	cell fate determination	4/208	42/18870	0.0011565	0.00752353	MCL1/KLF4/HES1/SOX17	4
BP	GO:0046635	positive regulation of alpha-beta T cell activation	5/208	72/18870	0.00119226	0.00771589	MIR21/PNP/CD83/NFKBIZ/IL4R	5
BP	GO:0071260	cellular response to mechanical stimulus	5/208	72/18870	0.00119226	0.00771589	IRF1/PTGS2/GADD45A/FADD/IL1B	5
BP	GO:0048144	fibroblast proliferation	6/208	107/18870	0.00119755	0.00773001	CDKN1A/MYC/LIF/FOSL2/SPHK1/CKS2	6
BP	GO:0046890	regulation of lipid biosynthetic process	8/208	189/18870	0.00120799	0.00777726	EGR1/SIK1/PTGS2/SPHK1/LDLR/INSIG1/RDH10/IL1B	8
MF	GO:0019887	protein kinase regulator activity	9/212	226/18496	0.00122241	0.0276271	SOCS3/CDKN1A/GPRC5A/HBEGF/CCNL1/AREG/CKS2/SPRY4/ITPRIP	9
BP	GO:0031667	response to nutrient levels	14/208	495/18870	0.00122963	0.00789617	CDKN1A/ZFP36/PIM1/SLC7A5/FOS/ATF3/PTGS2/SLC25A25/STC1/KLF10/CHSY1/LDLR/NFKBIZ/CYP1B1	14
BP	GO:2000377	regulation of reactive oxygen species metabolic process	7/208	147/18870	0.00123901	0.00793594	MIR21/CDKN1A/IER3/THBS1/GADD45A/GCH1/CYP1B1	7
BP	GO:0045622	regulation of T-helper cell differentiation	4/208	43/18870	0.00126423	0.00804298	MIR21/JUNB/NFKBIZ/IL4R	4
BP	GO:1904037	positive regulation of epithelial cell apoptotic process	4/208	43/18870	0.00126423	0.00804298	IL6/CCL2/THBS1/HMOX1	4
BP	GO:0050818	regulation of coagulation	5/208	73/18870	0.00126863	0.00804298	THBS1/PLAUR/THBD/PLAU/SERPINE1	5
BP	GO:0072678	T cell migration	5/208	73/18870	0.00126863	0.00804298	CCL2/ICAM1/GPR183/FADD/CCL3	5
BP	GO:0002700	regulation of production of molecular mediator of immune response	8/208	191/18870	0.00129193	0.00812868	IL6/NR4A3/SLC7A5/ARID5A/DDX21/IL4R/IL1B/TNFRSF1B	8
BP	GO:0071706	tumor necrosis factor superfamily cytokine production	8/208	191/18870	0.00129193	0.00812868	IL6/ZFP36/THBS1/TNFAIP3/ARID5A/BCL3/FADD/CCL3	8
BP	GO:1903555	regulation of tumor necrosis factor superfamily cytokine production	8/208	191/18870	0.00129193	0.00812868	IL6/ZFP36/THBS1/TNFAIP3/ARID5A/BCL3/FADD/CCL3	8
BP	GO:0097623	potassium ion export across plasma membrane	3/208	20/18870	0.00131037	0.00822393	MIR21/KCNT2/KCNE4	3
BP	GO:2000516	positive regulation of CD4-positive, alpha-beta T cell activation	4/208	44/18870	0.00137877	0.00862037	MIR21/CD83/NFKBIZ/IL4R	4
BP	GO:0033673	negative regulation of kinase activity	8/208	193/18870	0.00138046	0.00862037	CDKN1A/GPRC5A/GADD45A/RGS2/ERRFI1/DUSP1/SPRY4/IL1B	8
MF	GO:0019955	cytokine binding	7/212	145/18496	0.00143131	0.0305513	ZFP36/THBS1/IL1RN/IL1RL1/LRRC32/CCRL2/TNFRSF1B	7
BP	GO:0061045	negative regulation of wound healing	5/208	75/18870	0.00143213	0.00892064	THBS1/PLAUR/THBD/PLAU/SERPINE1	5
BP	GO:0001890	placenta development	7/208	151/18870	0.00144676	0.00898931	SOCS3/JUNB/LIF/PTGS2/FOSL1/STC1/HES1	7
BP	GO:0045687	positive regulation of glial cell differentiation	4/208	45/18870	0.00150037	0.00929925	EGR2/LIF/HES1/TNFRSF1B	4
BP	GO:1901991	negative regulation of mitotic cell cycle phase transition	8/208	196/18870	0.00152223	0.0094113	CCL2/CDKN1A/IER3/KLF4/DCUN1D3/DUSP1/INHBA/NABP1	8
BP	GO:0030183	B cell differentiation	7/208	153/18870	0.00156034	0.0095993	IL6/BCL3/FOSL2/GPR183/KLF6/INHBA/NFKBIZ	7
BP	GO:0043535	regulation of blood vessel endothelial cell migration	7/208	153/18870	0.00156034	0.0095993	THBS1/PTGS2/KLF4/GADD45A/MIR22/HMOX1/EPHA2	7
MF	GO:0008138	protein tyrosine/serine/threonine phosphatase activity	4/212	44/18496	0.0015907	0.0321664	DUSP5/DUSP2/DUSP1/DUSP6	4
BP	GO:0032729	positive regulation of type II interferon production	5/208	77/18870	0.00161064	0.00988435	SLC7A5/ARID5A/BCL3/FADD/IL1B	5
BP	GO:2000514	regulation of CD4-positive, alpha-beta T cell activation	5/208	78/18870	0.00170579	0.0104425	MIR21/JUNB/CD83/NFKBIZ/IL4R	5
BP	GO:0090257	regulation of muscle system process	9/208	247/18870	0.00172535	0.0105073	MIR21/NR4A3/PTGS2/NR4A1/STC1/SPHK1/RGS2/LMCD1/TNFRSF1B	9
BP	GO:0071248	cellular response to metal ion	8/208	200/18870	0.00172896	0.0105073	FOSB/JUNB/FOS/PTGS2/JUN/HMOX1/ITPKC/MT2A	8
BP	GO:0062014	negative regulation of small molecule metabolic process	6/208	115/18870	0.00173414	0.0105073	CH25H/SIK1/MIR21/IER3/INSIG1/MST1	6
BP	GO:0045624	positive regulation of T-helper cell differentiation	3/208	22/18870	0.00174168	0.0105073	MIR21/NFKBIZ/IL4R	3
BP	GO:0060546	negative regulation of necroptotic process	3/208	22/18870	0.00174168	0.0105073	MIR22/FADD/BIRC3	3
BP	GO:2000319	regulation of T-helper 17 cell differentiation	3/208	22/18870	0.00174168	0.0105073	MIR21/JUNB/NFKBIZ	3
BP	GO:0010837	regulation of keratinocyte proliferation	4/208	47/18870	0.00176562	0.0106004	MIR21/ZFP36/HAS2/AREG	4
BP	GO:0045933	positive regulation of muscle contraction	4/208	47/18870	0.00176562	0.0106004	MIR21/PTGS2/SPHK1/RGS2	4
BP	GO:0045582	positive regulation of T cell differentiation	6/208	116/18870	0.00181225	0.0108543	EGR3/MIR21/PNP/CD83/NFKBIZ/IL4R	6
BP	GO:0001935	endothelial cell proliferation	8/208	202/18870	0.00184034	0.010996	EGR3/MIR21/CCL2/THBS1/NR4A1/MIR22/HMOX1/EPHA2	8
BP	GO:0090049	regulation of cell migration involved in sprouting angiogenesis	5/208	80/18870	0.00190836	0.0113021	THBS1/PTGS2/KLF4/MIR22/HMOX1	5
BP	GO:0032620	interleukin-17 production	4/208	48/18870	0.00190971	0.0113021	IL6/SLC7A5/ARID5A/SPHK1	4
BP	GO:0032660	regulation of interleukin-17 production	4/208	48/18870	0.00190971	0.0113021	IL6/SLC7A5/ARID5A/SPHK1	4
BP	GO:0070509	calcium ion import	4/208	48/18870	0.00190971	0.0113021	CCL2/STC1/HES1/CCL3	4
BP	GO:0007517	muscle organ development	11/208	354/18870	0.00196773	0.0116179	EGR1/EGR3/MAFF/EGR2/LIF/FOS/ATF3/HBEGF/NR4A1/BTG2/DISP1	11
BP	GO:0002689	negative regulation of leukocyte chemotaxis	3/208	23/18870	0.00198677	0.0116475	CCL2/TNFAIP6/DUSP1	3
BP	GO:0060252	positive regulation of glial cell proliferation	3/208	23/18870	0.00198677	0.0116475	IL6/SLC7A5/IL1B	3
BP	GO:0062099	negative regulation of programmed necrotic cell death	3/208	23/18870	0.00198677	0.0116475	MIR22/FADD/BIRC3	3
BP	GO:0001774	microglial cell activation	4/208	49/18870	0.00206174	0.0120304	IL6/SPHK1/LDLR/CCL3	4
BP	GO:0070266	necroptotic process	4/208	49/18870	0.00206174	0.0120304	MIR22/FADD/BIRC3/MLKL	4
BP	GO:0046660	female sex differentiation	6/208	120/18870	0.00215167	0.0125258	ADAMTS1/PTX3/TNFAIP6/TIPARP/INHBA/FST	6
BP	GO:1901654	response to ketone	8/208	208/18870	0.0022088	0.0128284	FOSB/CDKN1A/THBS1/FOS/FOSL1/SGK1/INHBA/CYP1B1	8
BP	GO:0022602	ovulation cycle process	4/208	50/18870	0.00222192	0.0128747	ADAMTS1/PTX3/TNFAIP6/INHBA	4
BP	GO:0001570	vasculogenesis	5/208	83/18870	0.00224446	0.0129601	JUNB/HAS2/TIPARP/SOX17/EPHA2	5
BP	GO:0034114	regulation of heterotypic cell-cell adhesion	3/208	24/18870	0.00225228	0.0129601	IL1RN/KLF4/IL1B	3
BP	GO:0046426	negative regulation of receptor signaling pathway via JAK-STAT	3/208	24/18870	0.00225228	0.0129601	SOCS3/BCL3/SOCS2	3
BP	GO:0006643	membrane lipid metabolic process	8/208	209/18870	0.00227547	0.0130634	CREM/UGCG/SPHK1/B3GNT5/PIGA/GLA/CYP1B1/SGMS2	8
BP	GO:0019083	viral transcription	4/208	51/18870	0.00239049	0.0136561	ZFP36/CHD1/JUN/CCL3	4
BP	GO:0043407	negative regulation of MAP kinase activity	4/208	51/18870	0.00239049	0.0136561	RGS2/DUSP1/SPRY4/IL1B	4
BP	GO:0035051	cardiocyte differentiation	7/208	165/18870	0.00239516	0.0136561	SIK1/MIR21/RGS2/HES1/KDM6B/SOX17/INHBA	7
BP	GO:0007519	skeletal muscle tissue development	7/208	166/18870	0.00247776	0.0140948	EGR1/MAFF/EGR2/FOS/ATF3/NR4A1/BTG2	7
BP	GO:0050878	regulation of body fluid levels	11/208	365/18870	0.00249403	0.0141551	IL6/THBS1/HAS2/PLAUR/THBD/FOSL2/PLAU/SERPINE1/TFPI2/SOCS2/DGKD	11
BP	GO:0002824	positive regulation of adaptive immune response based on somatic recombination of immune receptors built from immunoglobulin superfamily domains	6/208	124/18870	0.002537	0.0142148	IL6/MIR21/ARID5A/FADD/NFKBIZ/IL1B	6
BP	GO:0035988	chondrocyte proliferation	3/208	25/18870	0.00253878	0.0142148	MIR21/FOSL2/STC1	3
BP	GO:0045649	regulation of macrophage differentiation	3/208	25/18870	0.00253878	0.0142148	LIF/FADD/INHBA	3
BP	GO:0048143	astrocyte activation	3/208	25/18870	0.00253878	0.0142148	IL6/LDLR/IL1B	3
BP	GO:0090335	regulation of brown fat cell differentiation	3/208	25/18870	0.00253878	0.0142148	PIM1/PTGS2/METRNL	3
BP	GO:1904754	positive regulation of vascular associated smooth muscle cell migration	3/208	25/18870	0.00253878	0.0142148	MIR21/NR4A3/ADAMTS1	3
MF	GO:0048020	CCR chemokine receptor binding	4/212	50/18496	0.00255821	0.0491262	CCL2/CCL8/CCL3/CCRL2	4
BP	GO:0002269	leukocyte activation involved in inflammatory response	4/208	52/18870	0.00256765	0.0143121	IL6/SPHK1/LDLR/CCL3	4
BP	GO:1904707	positive regulation of vascular associated smooth muscle cell proliferation	4/208	52/18870	0.00256765	0.0143121	MIR21/NR4A3/ADAMTS1/JUN	4
BP	GO:2000134	negative regulation of G1/S transition of mitotic cell cycle	5/208	86/18870	0.00262173	0.0145809	CCL2/CDKN1A/KLF4/DCUN1D3/INHBA	5
BP	GO:0071675	regulation of mononuclear cell migration	6/208	125/18870	0.00264095	0.0146551	CCL2/THBS1/SERPINE1/DUSP1/FADD/CCL3	6
BP	GO:0050792	regulation of viral process	7/208	168/18870	0.00264952	0.01467	CH25H/ZFP36/CXCL8/PTX3/ISG20/VPS37B/SLPI	7
MF	GO:0008083	growth factor activity	7/212	162/18496	0.00268512	0.0491262	IL6/LIF/HBEGF/CXCL1/AREG/INHBA/CSF3	7
BP	GO:0002762	negative regulation of myeloid leukocyte differentiation	4/208	53/18870	0.00275362	0.0151313	MYC/TNFAIP6/INHBA/CCL3	4
BP	GO:0032088	negative regulation of NF-kappaB transcription factor activity	5/208	87/18870	0.00275712	0.0151313	MIR21/TNFAIP3/BCL3/KLF4/CYP1B1	5
BP	GO:0048708	astrocyte differentiation	5/208	87/18870	0.00275712	0.0151313	IL6/LIF/LDLR/HES1/IL1B	5
BP	GO:0051851	modulation by host of symbiont process	5/208	87/18870	0.00275712	0.0151313	PTX3/CCL8/CHD1/JUN/CCL3	5
BP	GO:0002726	positive regulation of T cell cytokine production	3/208	26/18870	0.0028468	0.0155549	IL6/ARID5A/IL1B	3
BP	GO:1904996	positive regulation of leukocyte adhesion to vascular endothelial cell	3/208	26/18870	0.0028468	0.0155549	IL6/MIR21/SELE	3
BP	GO:0050873	brown fat cell differentiation	4/208	54/18870	0.00294861	0.0160448	PIM1/PTGS2/RGS2/METRNL	4
BP	GO:0051346	negative regulation of hydrolase activity	8/208	218/18870	0.00294934	0.0160448	MIR21/THBS1/PLAUR/PTX3/KLF4/RGS2/PPP1R15A/SERPINE1	8
CC	GO:0035579	specific granule membrane	5/213	91/19886	0.00296748	0.0931891	SLC2A3/PLAUR/PLAU/CD93/TNFRSF1B	5
BP	GO:0098773	skin epidermis development	6/208	128/18870	0.00297201	0.0161329	KLF4/UGCG/GRHL1/INHBA/FST/NFKBIZ	6
BP	GO:0048145	regulation of fibroblast proliferation	5/208	89/18870	0.00304299	0.0164823	CDKN1A/MYC/LIF/FOSL2/SPHK1	5
BP	GO:0030198	extracellular matrix organization	10/208	321/18870	0.00306518	0.0165306	IL6/ADAMTS1/HAS2/PTX3/BCL3/ADAMTS9/CRISPLD2/HAS1/CYP1B1/TNFRSF1B	10
BP	GO:0031348	negative regulation of defense response	10/208	321/18870	0.00306518	0.0165306	SOCS3/MIR21/IER3/ZFP36/TNFAIP3/TNFAIP6/KLF4/LDLR/METRNL/TNFRSF1B	10
BP	GO:0043062	extracellular structure organization	10/208	322/18870	0.00313375	0.0168639	IL6/ADAMTS1/HAS2/PTX3/BCL3/ADAMTS9/CRISPLD2/HAS1/CYP1B1/TNFRSF1B	10
BP	GO:0002043	blood vessel endothelial cell proliferation involved in sprouting angiogenesis	4/208	55/18870	0.00315283	0.0168936	MIR21/THBS1/HMOX1/EPHA2	4
BP	GO:0002686	negative regulation of leukocyte migration	4/208	55/18870	0.00315283	0.0168936	CCL2/TNFAIP6/HMOX1/DUSP1	4
BP	GO:0071480	cellular response to gamma radiation	3/208	27/18870	0.00317687	0.0169859	EGR1/MIR21/CDKN1A	3
BP	GO:0045229	external encapsulating structure organization	10/208	323/18870	0.00320354	0.0170498	IL6/ADAMTS1/HAS2/PTX3/BCL3/ADAMTS9/CRISPLD2/HAS1/CYP1B1/TNFRSF1B	10
BP	GO:0002821	positive regulation of adaptive immune response	6/208	130/18870	0.00320935	0.0170498	IL6/MIR21/ARID5A/FADD/NFKBIZ/IL1B	6
BP	GO:0045621	positive regulation of lymphocyte differentiation	6/208	130/18870	0.00320935	0.0170498	EGR3/MIR21/PNP/CD83/NFKBIZ/IL4R	6
BP	GO:0009615	response to virus	12/208	436/18870	0.00338001	0.0179103	IL6/MIR21/TNFAIP3/IRF1/BCL3/CCL8/FOSL1/DDX21/FADD/ISG20/MLKL/IL1B	12
BP	GO:0050866	negative regulation of cell activation	8/208	223/18870	0.00338571	0.0179103	MIR21/TNFAIP3/IRF1/THBD/LDLR/LRRC32/INHBA/IL4R	8
BP	GO:0007596	blood coagulation	8/208	224/18870	0.0034787	0.0183633	IL6/THBS1/PLAUR/THBD/PLAU/SERPINE1/TFPI2/DGKD	8
BP	GO:1903510	mucopolysaccharide metabolic process	5/208	92/18870	0.00351104	0.0184948	HAS2/TNFAIP6/CHSY1/HAS1/IL1B	5
BP	GO:0002675	positive regulation of acute inflammatory response	3/208	28/18870	0.00352945	0.0185135	IL6/PTGS2/IL1B	3
BP	GO:0048245	eosinophil chemotaxis	3/208	28/18870	0.00352945	0.0185135	CCL2/CCL8/CCL3	3
BP	GO:0019730	antimicrobial humoral response	6/208	133/18870	0.00359149	0.0187993	CXCL2/CXCL8/BCL3/CXCL3/CXCL1/SLPI	6
BP	GO:0018108	peptidyl-tyrosine phosphorylation	9/208	276/18870	0.00362754	0.0189482	IL6/SOCS3/LIF/GPRC5A/HBEGF/AREG/HES1/ERRFI1/CSF3	9
BP	GO:0043502	regulation of muscle adaptation	5/208	93/18870	0.00367795	0.0190915	MIR21/NR4A3/RGS2/LMCD1/TNFRSF1B	5
BP	GO:0048525	negative regulation of viral process	5/208	93/18870	0.00367795	0.0190915	CH25H/ZFP36/PTX3/ISG20/SLPI	5
BP	GO:1904705	regulation of vascular associated smooth muscle cell proliferation	5/208	93/18870	0.00367795	0.0190915	MIR21/NR4A3/CDKN1A/ADAMTS1/JUN	5
BP	GO:0018212	peptidyl-tyrosine modification	9/208	278/18870	0.003803	0.0196587	IL6/SOCS3/LIF/GPRC5A/HBEGF/AREG/HES1/ERRFI1/CSF3	9
BP	GO:0042113	B cell activation	9/208	278/18870	0.003803	0.0196587	IL6/CDKN1A/TNFAIP3/BCL3/FOSL2/GPR183/KLF6/INHBA/NFKBIZ	9
BP	GO:0061756	leukocyte adhesion to vascular endothelial cell	4/208	58/18870	0.00382296	0.0197209	IL6/MIR21/SELE/KLF4	4
MF	GO:0016757	glycosyltransferase activity	9/212	268/18496	0.00386063	0.0657712	NAMPT/HAS2/PNP/UGCG/CHSY1/B3GNT5/PIGA/TIPARP/HAS1	9
BP	GO:0003416	endochondral bone growth	3/208	29/18870	0.00390503	0.0200612	FOSL2/STC1/BNC2	3
BP	GO:0072012	glomerulus vasculature development	3/208	29/18870	0.00390503	0.0200612	EGR1/GPR4/HES1	3
MF	GO:0051019	mitogen-activated protein kinase binding	3/212	28/18496	0.00393726	0.0657712	DUSP2/GCH1/DUSP1	3
BP	GO:0050817	coagulation	8/208	229/18870	0.00397377	0.0203723	IL6/THBS1/PLAUR/THBD/PLAU/SERPINE1/TFPI2/DGKD	8
BP	GO:0001936	regulation of endothelial cell proliferation	7/208	181/18870	0.00399941	0.0204437	EGR3/MIR21/CCL2/THBS1/NR4A1/MIR22/HMOX1	7
BP	GO:0098781	ncRNA transcription	6/208	136/18870	0.00400647	0.0204437	EGR1/MYC/FOS/FOSL1/KLF4/JUN	6
BP	GO:0045638	negative regulation of myeloid cell differentiation	5/208	95/18870	0.00402871	0.0204437	ZFP36/MYC/TNFAIP6/INHBA/CCL3	5
BP	GO:1902807	negative regulation of cell cycle G1/S phase transition	5/208	95/18870	0.00402871	0.0204437	CCL2/CDKN1A/KLF4/DCUN1D3/INHBA	5
BP	GO:1990874	vascular associated smooth muscle cell proliferation	5/208	95/18870	0.00402871	0.0204437	MIR21/NR4A3/CDKN1A/ADAMTS1/JUN	5
BP	GO:0071214	cellular response to abiotic stimulus	10/208	334/18870	0.00405607	0.020449	EGR1/MIR21/CDKN1A/SPIDR/MYC/IRF1/PTGS2/GADD45A/FADD/IL1B	10
BP	GO:0104004	cellular response to environmental stimulus	10/208	334/18870	0.00405607	0.020449	EGR1/MIR21/CDKN1A/SPIDR/MYC/IRF1/PTGS2/GADD45A/FADD/IL1B	10
BP	GO:0010574	regulation of vascular endothelial growth factor production	4/208	59/18870	0.00406617	0.020449	IL6/PTGS2/CYP1B1/IL1B	4
BP	GO:0046686	response to cadmium ion	4/208	59/18870	0.00406617	0.020449	FOS/JUN/HMOX1/MT2A	4
BP	GO:0048705	skeletal system morphogenesis	8/208	230/18870	0.004079	0.020449	CSRNP1/HAS2/FOSL2/STC1/CHSY1/INSIG1/TIPARP/RDH10	8
BP	GO:0051403	stress-activated MAPK cascade	8/208	230/18870	0.004079	0.020449	ZFP36/MYC/GADD45B/SPHK1/GADD45A/DUSP1/GADD45G/IL1B	8
BP	GO:0007599	hemostasis	8/208	231/18870	0.00418637	0.0209451	IL6/THBS1/PLAUR/THBD/PLAU/SERPINE1/TFPI2/DGKD	8
BP	GO:0002690	positive regulation of leukocyte chemotaxis	5/208	96/18870	0.00421277	0.021035	IL6/THBS1/CXCL8/SERPINE1/CCL3	5
BP	GO:0060759	regulation of response to cytokine stimulus	7/208	183/18870	0.00424635	0.0211602	IL6/MIR21/IL1RN/TNFAIP3/KLF4/SPHK1/FADD	7
BP	GO:0010955	negative regulation of protein processing	3/208	30/18870	0.00430405	0.0212282	THBS1/PLAU/SERPINE1	3
BP	GO:0045987	positive regulation of smooth muscle contraction	3/208	30/18870	0.00430405	0.0212282	MIR21/PTGS2/SPHK1	3
BP	GO:1903318	negative regulation of protein maturation	3/208	30/18870	0.00430405	0.0212282	THBS1/PLAU/SERPINE1	3
BP	GO:0002763	positive regulation of myeloid leukocyte differentiation	4/208	60/18870	0.00431963	0.0212282	LIF/FOS/KLF10/FADD	4
BP	GO:0045620	negative regulation of lymphocyte differentiation	4/208	60/18870	0.00431963	0.0212282	MIR21/IRF1/INHBA/IL4R	4
BP	GO:0071384	cellular response to corticosteroid stimulus	4/208	60/18870	0.00431963	0.0212282	ZFP36/STC1/SGK1/CYP1B1	4
BP	GO:0097300	programmed necrotic cell death	4/208	60/18870	0.00431963	0.0212282	MIR22/FADD/BIRC3/MLKL	4
BP	GO:1903035	negative regulation of response to wounding	5/208	97/18870	0.00440276	0.0215756	THBS1/PLAUR/THBD/PLAU/SERPINE1	5
BP	GO:0008406	gonad development	8/208	233/18870	0.00440764	0.0215756	ADAMTS1/PTX3/TNFAIP6/TIPARP/RDH10/INHBA/FST/CYP1B1	8
BP	GO:0071900	regulation of protein serine/threonine kinase activity	9/208	285/18870	0.00447013	0.0218386	CDKN1A/THBS1/SERTAD1/GADD45A/RGS2/DUSP1/MST1/SPRY4/IL1B	9
BP	GO:0003012	muscle system process	12/208	452/18870	0.00449796	0.0219316	MIR21/NR4A3/PTGS2/NR4A1/STC1/SPHK1/RGS2/HMOX1/KCNE4/LMCD1/IL1B/TNFRSF1B	12
BP	GO:0006940	regulation of smooth muscle contraction	4/208	61/18870	0.00458353	0.0223051	MIR21/PTGS2/SPHK1/RGS2	4
BP	GO:0032872	regulation of stress-activated MAPK cascade	7/208	186/18870	0.00463818	0.0225271	MYC/GADD45B/SPHK1/GADD45A/DUSP1/GADD45G/IL1B	7
BP	GO:0001562	response to protozoan	3/208	31/18870	0.00472691	0.0225622	IER3/BCL3/IL4R	3
BP	GO:0001975	response to amphetamine	3/208	31/18870	0.00472691	0.0225622	NR4A2/NR4A1/RGS2	3
BP	GO:0032682	negative regulation of chemokine production	3/208	31/18870	0.00472691	0.0225622	IL6/KLF4/EPHA2	3
BP	GO:0035335	peptidyl-tyrosine dephosphorylation	3/208	31/18870	0.00472691	0.0225622	DUSP5/DUSP1/DUSP6	3
BP	GO:0035767	endothelial cell chemotaxis	3/208	31/18870	0.00472691	0.0225622	EGR3/THBS1/NR4A1	3
BP	GO:0050999	regulation of nitric-oxide synthase activity	3/208	31/18870	0.00472691	0.0225622	GCH1/GLA/IL1B	3
BP	GO:0060325	face morphogenesis	3/208	31/18870	0.00472691	0.0225622	CSRNP1/CRISPLD2/TIPARP	3
BP	GO:0061437	renal system vasculature development	3/208	31/18870	0.00472691	0.0225622	EGR1/GPR4/HES1	3
BP	GO:0061440	kidney vasculature development	3/208	31/18870	0.00472691	0.0225622	EGR1/GPR4/HES1	3
BP	GO:0019216	regulation of lipid metabolic process	10/208	342/18870	0.00478189	0.0227406	CH25H/EGR1/SIK1/NR4A3/PTGS2/SPHK1/LDLR/INSIG1/RDH10/IL1B	10
BP	GO:0052548	regulation of endopeptidase activity	9/208	288/18870	0.00478255	0.0227406	MIR21/THBS1/PLAUR/MYC/KLF4/SERPINE1/FADD/SOX7/BIRC3	9
BP	GO:0002709	regulation of T cell mediated immunity	5/208	99/18870	0.00480092	0.0227412	IL6/ARID5A/FADD/IL1B/TNFRSF1B	5
BP	GO:0003300	cardiac muscle hypertrophy	5/208	99/18870	0.00480092	0.0227412	MIR21/NR4A3/RGS2/LMCD1/TNFRSF1B	5
BP	GO:0044000	movement in host	7/208	188/18870	0.00491416	0.0232334	CH25H/CXCL8/PTX3/ICAM1/LDLR/EPHA2/VPS37B	7
BP	GO:0031098	stress-activated protein kinase signaling cascade	8/208	238/18870	0.00500025	0.0235492	ZFP36/MYC/GADD45B/SPHK1/GADD45A/DUSP1/GADD45G/IL1B	8
BP	GO:0045137	development of primary sexual characteristics	8/208	238/18870	0.00500025	0.0235492	ADAMTS1/PTX3/TNFAIP6/TIPARP/RDH10/INHBA/FST/CYP1B1	8
BP	GO:0060349	bone morphogenesis	5/208	100/18870	0.0050093	0.0235492	HAS2/FOSL2/STC1/CHSY1/INSIG1	5
BP	GO:0070302	regulation of stress-activated protein kinase signaling cascade	7/208	189/18870	0.00505671	0.0237273	MYC/GADD45B/SPHK1/GADD45A/DUSP1/GADD45G/IL1B	7
BP	GO:1903900	regulation of viral life cycle	6/208	143/18870	0.00511176	0.0237412	CH25H/CXCL8/PTX3/ISG20/VPS37B/SLPI	6
BP	GO:0035747	natural killer cell chemotaxis	2/208	10/18870	0.00513361	0.0237412	CCL2/CCL3	2
BP	GO:0072203	cell proliferation involved in metanephros development	2/208	10/18870	0.00513361	0.0237412	EGR1/MYC	2
BP	GO:1904760	regulation of myofibroblast differentiation	2/208	10/18870	0.00513361	0.0237412	MIR21/FOSL2	2
BP	GO:2000121	regulation of removal of superoxide radicals	2/208	10/18870	0.00513361	0.0237412	MIR21/GCH1	2
BP	GO:0010573	vascular endothelial growth factor production	4/208	63/18870	0.00514346	0.0237412	IL6/PTGS2/CYP1B1/IL1B	4
BP	GO:0032757	positive regulation of interleukin-8 production	4/208	63/18870	0.00514346	0.0237412	IL6/SERPINE1/FADD/IL1B	4
BP	GO:0046685	response to arsenic-containing substance	3/208	32/18870	0.00517401	0.0237412	CDKN1A/HMOX1/CYP1B1	3
BP	GO:0060055	angiogenesis involved in wound healing	3/208	32/18870	0.00517401	0.0237412	TNFAIP3/GPR4/SERPINE1	3
BP	GO:0060795	cell fate commitment involved in formation of primary germ layer	3/208	32/18870	0.00517401	0.0237412	KLF4/ETS2/SOX17	3
BP	GO:0072677	eosinophil migration	3/208	32/18870	0.00517401	0.0237412	CCL2/CCL8/CCL3	3
BP	GO:0098868	bone growth	3/208	32/18870	0.00517401	0.0237412	FOSL2/STC1/BNC2	3
MF	GO:0070851	growth factor receptor binding	6/212	138/18496	0.00518989	0.080017	IL6/IL1RN/HBEGF/AREG/IL1B/CSF3	6
MF	GO:0003924	GTPase activity	10/212	333/18496	0.00520658	0.080017	GEM/RND1/RND3/RGS16/RGS2/RGS1/ARL5B/GCH1/ARL4C/RAB15	10
BP	GO:0031100	animal organ regeneration	4/208	64/18870	0.00543985	0.0248937	IL6/NR4A3/CDKN1A/SLC7A5	4
BP	GO:0014897	striated muscle hypertrophy	5/208	102/18870	0.00544517	0.0248937	MIR21/NR4A3/RGS2/LMCD1/TNFRSF1B	5
BP	GO:0060914	heart formation	3/208	33/18870	0.00564573	0.0257163	PIM1/HES1/SOX17	3
BP	GO:1904893	negative regulation of receptor signaling pathway via STAT	3/208	33/18870	0.00564573	0.0257163	SOCS3/BCL3/SOCS2	3
BP	GO:0097306	cellular response to alcohol	5/208	103/18870	0.00567286	0.0257926	SPIDR/FOS/SGK1/INHBA/CYP1B1	5
BP	GO:0002443	leukocyte mediated immunity	12/208	466/18870	0.00570356	0.025885	IL6/NR4A3/ICAM1/ARID5A/BCL3/DDX21/FADD/NFKBIZ/CCL3/IL4R/IL1B/TNFRSF1B	12
CC	GO:1904090	peptidase inhibitor complex	2/213	11/19886	0.0058932	0.137281	PLAU/SERPINE1	2
BP	GO:0014896	muscle hypertrophy	5/208	104/18870	0.00590718	0.0267604	MIR21/NR4A3/RGS2/LMCD1/TNFRSF1B	5
BP	GO:2000116	regulation of cysteine-type endopeptidase activity	7/208	195/18870	0.00597831	0.0270334	THBS1/PLAUR/MYC/KLF4/FADD/SOX7/BIRC3	7
BP	GO:0038061	non-canonical NF-kappaB signal transduction	6/208	148/18870	0.00602794	0.0272085	MIR21/BCL3/SPHK1/REL/BIRC3/IL1B	6
BP	GO:0032743	positive regulation of interleukin-2 production	3/208	34/18870	0.00614242	0.0273725	PNP/CD83/IL1B	3
BP	GO:0048333	mesodermal cell differentiation	3/208	34/18870	0.00614242	0.0273725	KLF4/KDM6B/INHBA	3
BP	GO:0043123	positive regulation of canonical NF-kappaB signal transduction	7/208	196/18870	0.00614335	0.0273725	DDX21/HMOX1/REL/SLC20A1/FADD/BIRC3/IL1B	7
BP	GO:0007249	canonical NF-kappaB signal transduction	9/208	300/18870	0.0062056	0.0273725	TNFAIP3/BCL3/DDX21/HMOX1/REL/SLC20A1/FADD/BIRC3/IL1B	9
BP	GO:0001547	antral ovarian follicle growth	2/208	11/18870	0.00622906	0.0273725	PTX3/TNFAIP6	2
BP	GO:0001660	fever generation	2/208	11/18870	0.00622906	0.0273725	PTGS2/IL1B	2
BP	GO:0002158	osteoclast proliferation	2/208	11/18870	0.00622906	0.0273725	JUNB/TNFAIP3	2
BP	GO:0003263	cardioblast proliferation	2/208	11/18870	0.00622906	0.0273725	PIM1/HES1	2
BP	GO:0003264	regulation of cardioblast proliferation	2/208	11/18870	0.00622906	0.0273725	PIM1/HES1	2
BP	GO:0021903	rostrocaudal neural tube patterning	2/208	11/18870	0.00622906	0.0273725	HES1/SOX17	2
BP	GO:0034115	negative regulation of heterotypic cell-cell adhesion	2/208	11/18870	0.00622906	0.0273725	IL1RN/KLF4	2
BP	GO:0046349	amino sugar biosynthetic process	2/208	11/18870	0.00622906	0.0273725	UAP1/GFPT2	2
BP	GO:0070587	regulation of cell-cell adhesion involved in gastrulation	2/208	11/18870	0.00622906	0.0273725	IL1RN/KLF4	2
BP	GO:1903897	regulation of PERK-mediated unfolded protein response	2/208	11/18870	0.00622906	0.0273725	PPP1R15B/PPP1R15A	2
BP	GO:1904238	pericyte cell differentiation	2/208	11/18870	0.00622906	0.0273725	GPR4/EPHA2	2
BP	GO:0032760	positive regulation of tumor necrosis factor production	5/208	106/18870	0.00639614	0.0278647	IL6/THBS1/ARID5A/FADD/CCL3	5
BP	GO:0038034	signal transduction in absence of ligand	4/208	67/18870	0.00639698	0.0278647	MCL1/FADD/INHBA/IL1B	4
BP	GO:0048645	animal organ formation	4/208	67/18870	0.00639698	0.0278647	PIM1/HES1/SOX17/RDH10	4
BP	GO:0070613	regulation of protein processing	4/208	67/18870	0.00639698	0.0278647	THBS1/PLAUR/PLAU/SERPINE1	4
BP	GO:0097192	extrinsic apoptotic signaling pathway in absence of ligand	4/208	67/18870	0.00639698	0.0278647	MCL1/FADD/INHBA/IL1B	4
BP	GO:0002703	regulation of leukocyte mediated immunity	8/208	249/18870	0.00651774	0.0283411	IL6/ICAM1/ARID5A/DDX21/FADD/IL4R/IL1B/TNFRSF1B	8
MF	GO:0008194	UDP-glycosyltransferase activity	6/212	145/18496	0.00657636	0.097181	HAS2/UGCG/CHSY1/B3GNT5/PIGA/HAS1	6
BP	GO:0006664	glycolipid metabolic process	5/208	107/18870	0.00665098	0.028778	CREM/UGCG/B3GNT5/PIGA/GLA	5
BP	GO:0010614	negative regulation of cardiac muscle hypertrophy	3/208	35/18870	0.00666441	0.028778	MIR21/RGS2/TNFRSF1B	3
BP	GO:0036314	response to sterol	3/208	35/18870	0.00666441	0.028778	INSIG1/INHBA/CCL3	3
BP	GO:0060544	regulation of necroptotic process	3/208	35/18870	0.00666441	0.028778	MIR22/FADD/BIRC3	3
BP	GO:2000379	positive regulation of reactive oxygen species metabolic process	4/208	68/18870	0.00673927	0.0290509	CDKN1A/THBS1/GADD45A/CYP1B1	4
BP	GO:1903509	liposaccharide metabolic process	5/208	108/18870	0.00691284	0.0297477	CREM/UGCG/B3GNT5/PIGA/GLA	5
MF	GO:1990841	promoter-specific chromatin binding	4/212	66/18496	0.00694701	0.0988561	EGR1/FOSL1/KLF4/GADD45A	4
BP	GO:0002711	positive regulation of T cell mediated immunity	4/208	69/18870	0.00709347	0.0304199	IL6/ARID5A/FADD/IL1B	4
BP	GO:0045670	regulation of osteoclast differentiation	4/208	69/18870	0.00709347	0.0304199	FOS/TNFAIP6/KLF10/CCL3	4
BP	GO:0002695	negative regulation of leukocyte activation	7/208	202/18870	0.007206	0.0308221	MIR21/TNFAIP3/IRF1/LDLR/LRRC32/INHBA/IL4R	7
BP	GO:2000352	negative regulation of endothelial cell apoptotic process	3/208	36/18870	0.00721201	0.0308221	ICAM1/TNFAIP3/SERPINE1	3
MF	GO:0090482	vitamin transmembrane transporter activity	3/212	35/18496	0.00741784	0.101786	SLC2A14/SLC2A3/SLC19A2	3
BP	GO:0006482	protein demethylation	2/208	12/18870	0.0074209	0.0311855	KDM7A/KDM6B	2
BP	GO:0008214	protein dealkylation	2/208	12/18870	0.0074209	0.0311855	KDM7A/KDM6B	2
BP	GO:0022605	mammalian oogenesis stage	2/208	12/18870	0.0074209	0.0311855	PTX3/TNFAIP6	2
BP	GO:0031650	regulation of heat generation	2/208	12/18870	0.0074209	0.0311855	PTGS2/IL1B	2
BP	GO:0033629	negative regulation of cell adhesion mediated by integrin	2/208	12/18870	0.0074209	0.0311855	SERPINE1/CYP1B1	2
BP	GO:0036490	regulation of translation in response to endoplasmic reticulum stress	2/208	12/18870	0.0074209	0.0311855	PPP1R15B/PPP1R15A	2
BP	GO:0042416	dopamine biosynthetic process	2/208	12/18870	0.0074209	0.0311855	NR4A2/GCH1	2
BP	GO:0051549	positive regulation of keratinocyte migration	2/208	12/18870	0.0074209	0.0311855	HAS2/HBEGF	2
BP	GO:0070586	cell-cell adhesion involved in gastrulation	2/208	12/18870	0.0074209	0.0311855	IL1RN/KLF4	2
BP	GO:0002444	myeloid leukocyte mediated immunity	5/208	110/18870	0.00745806	0.0311855	IL6/NR4A3/DDX21/CCL3/IL4R	5
BP	GO:0010469	regulation of signaling receptor activity	5/208	110/18870	0.00745806	0.0311855	CCL2/GPRC5A/PLAU/SERPINE1/ERRFI1	5
BP	GO:1903557	positive regulation of tumor necrosis factor superfamily cytokine production	5/208	110/18870	0.00745806	0.0311855	IL6/THBS1/ARID5A/FADD/CCL3	5
BP	GO:0050922	negative regulation of chemotaxis	4/208	70/18870	0.00745976	0.0311855	CCL2/THBS1/TNFAIP6/DUSP1	4
BP	GO:0045807	positive regulation of endocytosis	6/208	155/18870	0.00750435	0.0313194	CCL2/SELE/PTX3/SERPINE1/IL1B/DGKD	6
BP	GO:0007623	circadian rhythm	7/208	204/18870	0.00758881	0.0316189	EGR1/SIK1/EGR3/NAMPT/NFIL3/KLF10/BHLHE40	7
BP	GO:0032611	interleukin-1 beta production	5/208	111/18870	0.0077416	0.032148	IL6/EGR1/TNFAIP3/SPHK1/CCL3	5
BP	GO:0032651	regulation of interleukin-1 beta production	5/208	111/18870	0.0077416	0.032148	IL6/EGR1/TNFAIP3/SPHK1/CCL3	5
BP	GO:0014741	negative regulation of muscle hypertrophy	3/208	37/18870	0.00778551	0.0321695	MIR21/RGS2/TNFRSF1B	3
BP	GO:0033280	response to vitamin D	3/208	37/18870	0.00778551	0.0321695	PIM1/PTGS2/STC1	3
BP	GO:0060323	head morphogenesis	3/208	37/18870	0.00778551	0.0321695	CSRNP1/CRISPLD2/TIPARP	3
BP	GO:1903317	regulation of protein maturation	4/208	71/18870	0.00783829	0.032334	THBS1/PLAUR/PLAU/SERPINE1	4
BP	GO:0052547	regulation of peptidase activity	9/208	312/18870	0.00793494	0.0326785	MIR21/THBS1/PLAUR/MYC/KLF4/SERPINE1/FADD/SOX7/BIRC3	9
MF	GO:0055056	D-glucose transmembrane transporter activity	2/212	12/18496	0.00800139	0.106008	SLC2A14/SLC2A3	2
BP	GO:0030203	glycosaminoglycan metabolic process	5/208	112/18870	0.00803256	0.0329716	HAS2/TNFAIP6/CHSY1/HAS1/IL1B	5
BP	GO:0045833	negative regulation of lipid metabolic process	5/208	112/18870	0.00803256	0.0329716	CH25H/SIK1/SPHK1/INSIG1/IL1B	5
CC	GO:0034774	secretory granule lumen	9/213	322/19886	0.00810081	0.137281	THBS1/PTX3/PNP/CXCL1/CRISPLD2/SERPINE1/GLA/HSPA6/SLPI	9
BP	GO:0006024	glycosaminoglycan biosynthetic process	4/208	72/18870	0.00822923	0.0337233	HAS2/CHSY1/HAS1/IL1B	4
BP	GO:0002440	production of molecular mediator of immune response	9/208	314/18870	0.00825569	0.0337762	IL6/NR4A3/SLC7A5/ARID5A/DDX21/NFKBIZ/IL4R/IL1B/TNFRSF1B	9
BP	GO:0046466	membrane lipid catabolic process	3/208	38/18870	0.00838519	0.0341378	SPHK1/GLA/CYP1B1	3
BP	GO:0048536	spleen development	3/208	38/18870	0.00838519	0.0341378	BCL3/FADD/NFKBIZ	3
BP	GO:1990776	response to angiotensin	3/208	38/18870	0.00838519	0.0341378	PTGS2/CA2/INHBA	3
BP	GO:1901875	positive regulation of post-translational protein modification	6/208	159/18870	0.00845667	0.0343727	EGR1/DDX21/ARRDC4/SPHK1/DCUN1D3/BIRC3	6
CC	GO:0070820	tertiary granule	6/213	164/19886	0.00856605	0.137281	SLC2A3/PTX3/TNFAIP6/CXCL1/PLAU/CD93	6
CC	GO:0060205	cytoplasmic vesicle lumen	9/213	325/19886	0.00857897	0.137281	THBS1/PTX3/PNP/CXCL1/CRISPLD2/SERPINE1/GLA/HSPA6/SLPI	9
BP	GO:0048872	homeostasis of number of cells	9/208	316/18870	0.00858623	0.0348425	IL6/ZFP36/TNFAIP3/FOSL2/GPR183/HMOX1/FADD/INHBA/NFKBIZ	9
CC	GO:0005905	clathrin-coated pit	4/213	75/19886	0.00859991	0.137281	SELE/SPHK1/LDLR/DGKD	4
BP	GO:0007175	negative regulation of epidermal growth factor-activated receptor activity	2/208	13/18870	0.00870689	0.0349902	GPRC5A/ERRFI1	2
BP	GO:0031392	regulation of prostaglandin biosynthetic process	2/208	13/18870	0.00870689	0.0349902	PTGS2/IL1B	2
BP	GO:0036462	TRAIL-activated apoptotic signaling pathway	2/208	13/18870	0.00870689	0.0349902	ATF3/FADD	2
BP	GO:0045986	negative regulation of smooth muscle contraction	2/208	13/18870	0.00870689	0.0349902	PTGS2/RGS2	2
BP	GO:0048711	positive regulation of astrocyte differentiation	2/208	13/18870	0.00870689	0.0349902	LIF/HES1	2
BP	GO:0060213	positive regulation of nuclear-transcribed mRNA poly(A) tail shortening	2/208	13/18870	0.00870689	0.0349902	ZFP36/BTG2	2
CC	GO:0031983	vesicle lumen	9/213	326/19886	0.00874303	0.137281	THBS1/PTX3/PNP/CXCL1/CRISPLD2/SERPINE1/GLA/HSPA6/SLPI	9
BP	GO:0045732	positive regulation of protein catabolic process	7/208	210/18870	0.00882764	0.0354183	IER3/TNFAIP3/LDLR/TIPARP/SOX17/IL1B/TNFRSF1B	7
BP	GO:0051701	biological process involved in interaction with host	7/208	211/18870	0.00904773	0.036074	CH25H/CXCL8/PTX3/ICAM1/LDLR/EPHA2/VPS37B	7
BP	GO:0002224	toll-like receptor signaling pathway	4/208	74/18870	0.00904898	0.036074	IRF1/FOSL1/BIRC3/NFKBIZ	4
BP	GO:0006023	aminoglycan biosynthetic process	4/208	74/18870	0.00904898	0.036074	HAS2/CHSY1/HAS1/IL1B	4
BP	GO:0045123	cellular extravasation	4/208	74/18870	0.00904898	0.036074	CCL2/SELE/ICAM1/FADD	4
BP	GO:0010948	negative regulation of cell cycle process	9/208	320/18870	0.0092774	0.0369255	CCL2/CDKN1A/IER3/LIF/KLF4/DCUN1D3/DUSP1/INHBA/NABP1	9
BP	GO:0043122	regulation of canonical NF-kappaB signal transduction	8/208	265/18870	0.00931829	0.0370291	TNFAIP3/DDX21/HMOX1/REL/SLC20A1/FADD/BIRC3/IL1B	8
MF	GO:0004860	protein kinase inhibitor activity	4/212	72/18496	0.00940489	0.120449	SOCS3/CDKN1A/SPRY4/ITPRIP	4
BP	GO:0001707	mesoderm formation	4/208	75/18870	0.0094781	0.0375431	KLF4/KDM6B/EPHA2/INHBA	4
BP	GO:0035924	cellular response to vascular endothelial growth factor stimulus	4/208	75/18870	0.0094781	0.0375431	EGR3/MIR21/NR4A1/SPHK1	4
BP	GO:0044409	entry into host	6/208	163/18870	0.00949284	0.0375431	CH25H/CXCL8/PTX3/ICAM1/LDLR/EPHA2	6
BP	GO:0045616	regulation of keratinocyte differentiation	3/208	40/18870	0.00966404	0.0380992	ZFP36/ERRFI1/GRHL1	3
BP	GO:0062098	regulation of programmed necrotic cell death	3/208	40/18870	0.00966404	0.0380992	MIR22/FADD/BIRC3	3
BP	GO:0002064	epithelial cell development	7/208	214/18870	0.00973217	0.0382468	CDKN1A/ICAM1/FOSL2/GPR4/STC1/EPHA2/IL1B	7
BP	GO:0060541	respiratory system development	7/208	214/18870	0.00973217	0.0382468	LIF/FOSL2/CRISPLD2/HES1/ERRFI1/RDH10/DISP1	7
BP	GO:0002467	germinal center formation	2/208	14/18870	0.0100848	0.0388363	TNFAIP3/BCL3	2
BP	GO:0006047	UDP-N-acetylglucosamine metabolic process	2/208	14/18870	0.0100848	0.0388363	UAP1/GFPT2	2
BP	GO:0010225	response to UV-C	2/208	14/18870	0.0100848	0.0388363	BCL3/DCUN1D3	2
BP	GO:0034392	negative regulation of smooth muscle cell apoptotic process	2/208	14/18870	0.0100848	0.0388363	MIR21/SLC7A5	2
BP	GO:0042541	hemoglobin biosynthetic process	2/208	14/18870	0.0100848	0.0388363	KLF4/INHBA	2
BP	GO:0043558	regulation of translational initiation in response to stress	2/208	14/18870	0.0100848	0.0388363	PPP1R15B/PPP1R15A	2
BP	GO:0043922	negative regulation by host of viral transcription	2/208	14/18870	0.0100848	0.0388363	JUN/CCL3	2
BP	GO:0051547	regulation of keratinocyte migration	2/208	14/18870	0.0100848	0.0388363	HAS2/HBEGF	2
BP	GO:0061043	regulation of vascular wound healing	2/208	14/18870	0.0100848	0.0388363	TNFAIP3/SERPINE1	2
BP	GO:0061469	regulation of type B pancreatic cell proliferation	2/208	14/18870	0.0100848	0.0388363	NR4A3/NR4A1	2
BP	GO:1901031	regulation of response to reactive oxygen species	2/208	14/18870	0.0100848	0.0388363	MIR21/GCH1	2
BP	GO:1901533	negative regulation of hematopoietic progenitor cell differentiation	2/208	14/18870	0.0100848	0.0388363	ZFP36/HES1	2
BP	GO:1902043	positive regulation of extrinsic apoptotic signaling pathway via death domain receptors	2/208	14/18870	0.0100848	0.0388363	THBS1/ATF3	2
BP	GO:0002691	regulation of cellular extravasation	3/208	41/18870	0.0103437	0.039468	SELE/ICAM1/FADD	3
BP	GO:0045923	positive regulation of fatty acid metabolic process	3/208	41/18870	0.0103437	0.039468	NR4A3/PTGS2/IL1B	3
BP	GO:0048246	macrophage chemotaxis	3/208	41/18870	0.0103437	0.039468	CCL2/THBS1/CCL3	3
BP	GO:0072210	metanephric nephron development	3/208	41/18870	0.0103437	0.039468	EGR1/LIF/HES1	3
BP	GO:0001937	negative regulation of endothelial cell proliferation	4/208	77/18870	0.0103756	0.039468	MIR21/CCL2/THBS1/MIR22	4
BP	GO:0032890	regulation of organic acid transport	4/208	77/18870	0.0103756	0.039468	THBS1/SLC7A5/RGS2/IL1B	4
BP	GO:0048332	mesoderm morphogenesis	4/208	77/18870	0.0103756	0.039468	KLF4/KDM6B/EPHA2/INHBA	4
BP	GO:0070373	negative regulation of ERK1 and ERK2 cascade	4/208	77/18870	0.0103756	0.039468	MIR21/LIF/ATF3/DUSP6	4
BP	GO:0070374	positive regulation of ERK1 and ERK2 cascade	7/208	218/18870	0.0107027	0.0406503	MIR21/CCL2/ICAM1/CCL8/GPR183/INHBA/CCL3	7
BP	GO:0042509	regulation of tyrosine phosphorylation of STAT protein	4/208	78/18870	0.0108442	0.0411251	IL6/SOCS3/LIF/HES1	4
BP	GO:0050731	positive regulation of peptidyl-tyrosine phosphorylation	6/208	168/18870	0.0109117	0.0413182	IL6/LIF/HBEGF/AREG/HES1/CSF3	6
BP	GO:0006022	aminoglycan metabolic process	5/208	121/18870	0.0110002	0.0415271	HAS2/TNFAIP6/CHSY1/HAS1/IL1B	5
BP	GO:0051702	biological process involved in interaction with symbiont	5/208	121/18870	0.0110002	0.0415271	PTX3/CCL8/CHD1/JUN/CCL3	5
BP	GO:0032733	positive regulation of interleukin-10 production	3/208	42/18870	0.0110504	0.0415277	IL6/BCL3/CD83	3
BP	GO:0042092	type 2 immune response	3/208	42/18870	0.0110504	0.0415277	IL6/BCL3/IL4R	3
BP	GO:0071634	regulation of transforming growth factor beta production	3/208	42/18870	0.0110504	0.0415277	THBS1/PTGS2/LRRC32	3
BP	GO:0051250	negative regulation of lymphocyte activation	6/208	169/18870	0.0112126	0.0420738	MIR21/TNFAIP3/IRF1/LRRC32/INHBA/IL4R	6
MF	GO:0019210	kinase inhibitor activity	4/212	76/18496	0.0113224	0.13797	SOCS3/CDKN1A/SPRY4/ITPRIP	4
BP	GO:0032874	positive regulation of stress-activated MAPK cascade	5/208	122/18870	0.0113704	0.0425799	GADD45B/SPHK1/GADD45A/GADD45G/IL1B	5
MF	GO:0001046	core promoter sequence-specific DNA binding	3/212	41/18496	0.0114912	0.13797	MYC/FOS/KLF10	3
BP	GO:0006937	regulation of muscle contraction	6/208	170/18870	0.0115192	0.0425799	MIR21/PTGS2/NR4A1/STC1/SPHK1/RGS2	6
BP	GO:0050767	regulation of neurogenesis	10/208	390/18870	0.0115205	0.0425799	IL6/EGR2/SLC7A5/LIF/LDLR/BTG2/HES1/BHLHE40/IL1B/TNFRSF1B	10
BP	GO:0030728	ovulation	2/208	15/18870	0.0115525	0.0425799	ADAMTS1/INHBA	2
BP	GO:0032352	positive regulation of hormone metabolic process	2/208	15/18870	0.0115525	0.0425799	EGR1/RDH10	2
BP	GO:0036446	myofibroblast differentiation	2/208	15/18870	0.0115525	0.0425799	MIR21/FOSL2	2
BP	GO:0060211	regulation of nuclear-transcribed mRNA poly(A) tail shortening	2/208	15/18870	0.0115525	0.0425799	ZFP36/BTG2	2
BP	GO:0070207	protein homotrimerization	2/208	15/18870	0.0115525	0.0425799	STEAP4/MLKL	2
BP	GO:0070424	regulation of nucleotide-binding oligomerization domain containing signaling pathway	2/208	15/18870	0.0115525	0.0425799	TNFAIP3/BIRC3	2
BP	GO:1900102	negative regulation of endoplasmic reticulum unfolded protein response	2/208	15/18870	0.0115525	0.0425799	PPP1R15B/PPP1R15A	2
BP	GO:1901722	regulation of cell proliferation involved in kidney development	2/208	15/18870	0.0115525	0.0425799	EGR1/MYC	2
BP	GO:2001279	regulation of unsaturated fatty acid biosynthetic process	2/208	15/18870	0.0115525	0.0425799	PTGS2/IL1B	2
BP	GO:0002065	columnar/cuboidal epithelial cell differentiation	5/208	123/18870	0.0117489	0.0431761	CDKN1A/KLF4/SERPINE1/HES1/FST	5
BP	GO:0030282	bone mineralization	5/208	123/18870	0.0117489	0.0431761	PTGS2/FOSL2/KLF10/SGMS2/CCL3	5
BP	GO:0014002	astrocyte development	3/208	43/18870	0.0117843	0.0432424	IL6/LDLR/IL1B	3
BP	GO:0043537	negative regulation of blood vessel endothelial cell migration	4/208	80/18870	0.011822	0.043289	THBS1/KLF4/GADD45A/MIR22	4
BP	GO:0001959	regulation of cytokine-mediated signaling pathway	6/208	171/18870	0.0118318	0.043289	IL6/MIR21/IL1RN/TNFAIP3/SPHK1/FADD	6
BP	GO:1901988	negative regulation of cell cycle phase transition	8/208	277/18870	0.011946	0.0436429	CCL2/CDKN1A/IER3/KLF4/DCUN1D3/DUSP1/INHBA/NABP1	8
BP	GO:0070304	positive regulation of stress-activated protein kinase signaling cascade	5/208	124/18870	0.012136	0.044272	GADD45B/SPHK1/GADD45A/GADD45G/IL1B	5
MF	GO:0016004	phospholipase activator activity	2/212	15/18496	0.0124455	0.141887	CCL8/CCL3	2
BP	GO:0021879	forebrain neuron differentiation	3/208	44/18870	0.0125457	0.0455666	HES1/INHBA/ZSWIM6	3
BP	GO:0046006	regulation of activated T cell proliferation	3/208	44/18870	0.0125457	0.0455666	MIR21/FADD/LRRC32	3
BP	GO:0090051	negative regulation of cell migration involved in sprouting angiogenesis	3/208	44/18870	0.0125457	0.0455666	THBS1/KLF4/MIR22	3
BP	GO:0042180	cellular ketone metabolic process	7/208	226/18870	0.0128521	0.0464852	EGR1/MIR21/NR4A3/PTGS2/INSIG1/RDH10/IL1B	7
BP	GO:0007260	tyrosine phosphorylation of STAT protein	4/208	82/18870	0.0128546	0.0464852	IL6/SOCS3/LIF/HES1	4
BP	GO:0051341	regulation of oxidoreductase activity	4/208	82/18870	0.0128546	0.0464852	MIR21/GCH1/GLA/IL1B	4
BP	GO:0031668	cellular response to extracellular stimulus	8/208	281/18870	0.0129327	0.0465897	NR4A2/CDKN1A/PIM1/SLC7A5/FOS/ATF3/FOSL1/KLF10	8
BP	GO:0010958	regulation of amino acid import across plasma membrane	2/208	16/18870	0.0131079	0.0465897	SLC7A5/RGS2	2
BP	GO:0021783	preganglionic parasympathetic fiber development	2/208	16/18870	0.0131079	0.0465897	EGR2/HES1	2
BP	GO:0032354	response to follicle-stimulating hormone	2/208	16/18870	0.0131079	0.0465897	INHBA/CYP1B1	2
BP	GO:0034112	positive regulation of homotypic cell-cell adhesion	2/208	16/18870	0.0131079	0.0465897	IL6/PLAUR	2
BP	GO:0045651	positive regulation of macrophage differentiation	2/208	16/18870	0.0131079	0.0465897	LIF/FADD	2
BP	GO:0045779	negative regulation of bone resorption	2/208	16/18870	0.0131079	0.0465897	IL6/TNFAIP3	2
BP	GO:0051044	positive regulation of membrane protein ectodomain proteolysis	2/208	16/18870	0.0131079	0.0465897	IL1B/TNFRSF1B	2
BP	GO:0051770	positive regulation of nitric-oxide synthase biosynthetic process	2/208	16/18870	0.0131079	0.0465897	CCL2/NAMPT	2
BP	GO:0072540	T-helper 17 cell lineage commitment	2/208	16/18870	0.0131079	0.0465897	IL6/SOCS3	2
BP	GO:1900034	regulation of cellular response to heat	2/208	16/18870	0.0131079	0.0465897	DNAJB1/IER5	2
BP	GO:1903789	regulation of amino acid transmembrane transport	2/208	16/18870	0.0131079	0.0465897	SLC7A5/RGS2	2
BP	GO:0031214	biomineral tissue development	6/208	175/18870	0.0131419	0.0466439	PTGS2/FOSL2/KLF10/SLC20A1/SGMS2/CCL3	6
MF	GO:0001227	DNA-binding transcription repressor activity, RNA polymerase II-specific	9/212	326/18496	0.0131435	0.141887	MYC/ATF3/NFIL3/CREM/ZBTB21/ETS2/JUN/HES1/BHLHE40	9
BP	GO:0071604	transforming growth factor beta production	3/208	45/18870	0.0133347	0.0472609	THBS1/PTGS2/LRRC32	3
BP	GO:0061844	antimicrobial humoral immune response mediated by antimicrobial peptide	4/208	83/18870	0.0133919	0.0473961	CXCL2/CXCL8/CXCL3/CXCL1	4
BP	GO:0010634	positive regulation of epithelial cell migration	6/208	176/18870	0.0134847	0.0476569	MIR21/THBS1/HAS2/PTGS2/HBEGF/HMOX1	6
BP	GO:0035265	organ growth	6/208	177/18870	0.0138337	0.048821	PIM1/FOSL2/STC1/RGS2/DUSP6/BNC2	6
MF	GO:0004857	enzyme inhibitor activity	10/212	386/18496	0.0138522	0.141887	SOCS3/CDKN1A/THBS1/DDX21/RGS2/SERPINE1/TFPI2/SPRY4/SLPI/ITPRIP	10
BP	GO:0072332	intrinsic apoptotic signaling pathway by p53 class mediator	4/208	84/18870	0.0139432	0.0491379	MIR21/CDKN1A/MYC/BCL3	4
CC	GO:0098637	protein complex involved in cell-matrix adhesion	2/213	17/19886	0.0139705	0.199997	PLAUR/PLAU	2
BP	GO:0061448	connective tissue development	8/208	285/18870	0.0139778	0.0491905	EGR1/MIR21/ARID5A/SLC25A25/FOSL2/GPR4/STC1/CHSY1	8
MF	GO:0046935	1-phosphatidylinositol-3-kinase regulator activity	2/212	16/18496	0.014117	0.141887	SOCS3/SOCS2	2
BP	GO:0006984	ER-nucleus signaling pathway	3/208	46/18870	0.0141513	0.0495213	PPP1R15B/PPP1R15A/INSIG1	3
BP	GO:0032768	regulation of monooxygenase activity	3/208	46/18870	0.0141513	0.0495213	GCH1/GLA/IL1B	3
BP	GO:0060711	labyrinthine layer development	3/208	46/18870	0.0141513	0.0495213	SOCS3/JUNB/HES1	3
BP	GO:2001239	regulation of extrinsic apoptotic signaling pathway in absence of ligand	3/208	46/18870	0.0141513	0.0495213	MCL1/INHBA/IL1B	3
MF	GO:0030295	protein kinase activator activity	5/212	124/18496	0.0141593	0.141887	CDKN1A/GPRC5A/HBEGF/AREG/CKS2	5
BP	GO:0045165	cell fate commitment	8/208	286/18870	0.0142485	0.0497914	IL6/SOCS3/MCL1/KLF4/ETS2/HES1/KDM6B/SOX17	8
BP	GO:0051101	regulation of DNA binding	4/208	85/18870	0.0145087	0.0504779	PLAUR/BCL3/JUN/HES1	4
BP	GO:0032612	interleukin-1 production	5/208	130/18870	0.0146411	0.0504779	IL6/EGR1/TNFAIP3/SPHK1/CCL3	5
BP	GO:0032652	regulation of interleukin-1 production	5/208	130/18870	0.0146411	0.0504779	IL6/EGR1/TNFAIP3/SPHK1/CCL3	5
BP	GO:0050864	regulation of B cell activation	5/208	130/18870	0.0146411	0.0504779	IL6/CDKN1A/TNFAIP3/GPR183/INHBA	5
MF	GO:0017018	myosin phosphatase activity	4/212	82/18496	0.0146425	0.141887	DUSP5/DUSP2/DUSP1/DUSP6	4
BP	GO:0006677	glycosylceramide metabolic process	2/208	17/18870	0.0147488	0.0504779	UGCG/GLA	2
BP	GO:0031643	positive regulation of myelination	2/208	17/18870	0.0147488	0.0504779	EGR2/TNFRSF1B	2
BP	GO:0031649	heat generation	2/208	17/18870	0.0147488	0.0504779	PTGS2/IL1B	2
BP	GO:0032310	prostaglandin secretion	2/208	17/18870	0.0147488	0.0504779	PTGS2/IL1B	2
BP	GO:0043923	positive regulation by host of viral transcription	2/208	17/18870	0.0147488	0.0504779	CHD1/JUN	2
BP	GO:0044320	cellular response to leptin stimulus	2/208	17/18870	0.0147488	0.0504779	NR4A3/UGCG	2
BP	GO:0044793	negative regulation by host of viral process	2/208	17/18870	0.0147488	0.0504779	PTX3/CCL8	2
BP	GO:0051447	negative regulation of meiotic cell cycle	2/208	17/18870	0.0147488	0.0504779	LIF/DUSP1	2
BP	GO:0070206	protein trimerization	2/208	17/18870	0.0147488	0.0504779	STEAP4/MLKL	2
BP	GO:0072109	glomerular mesangium development	2/208	17/18870	0.0147488	0.0504779	EGR1/GPR4	2
BP	GO:2000136	regulation of cell proliferation involved in heart morphogenesis	2/208	17/18870	0.0147488	0.0504779	PIM1/HES1	2
BP	GO:0007548	sex differentiation	8/208	288/18870	0.0148013	0.0505878	ADAMTS1/PTX3/TNFAIP6/TIPARP/RDH10/INHBA/FST/CYP1B1	8
CC	GO:0101002	ficolin-1-rich granule	6/213	185/19886	0.0148601	0.199997	SLC2A3/PNP/TNFAIP6/CRISPLD2/HSPA6/CD93	6
BP	GO:0014075	response to amine	3/208	47/18870	0.0149958	0.0509731	NR4A2/NR4A1/RGS2	3
BP	GO:0045601	regulation of endothelial cell differentiation	3/208	47/18870	0.0149958	0.0509731	MIR21/APOLD1/IL1B	3
BP	GO:0050798	activated T cell proliferation	3/208	47/18870	0.0149958	0.0509731	MIR21/FADD/LRRC32	3
BP	GO:0140353	lipid export from cell	3/208	47/18870	0.0149958	0.0509731	PTGS2/INHBA/IL1B	3
BP	GO:0033273	response to vitamin	4/208	86/18870	0.0150886	0.0511532	PIM1/PTGS2/STC1/NFKBIZ	4
BP	GO:0019079	viral genome replication	5/208	131/18870	0.0150899	0.0511532	CCL2/CXCL8/CCL8/ISG20/SLPI	5
MF	GO:0001217	DNA-binding transcription repressor activity	9/212	334/18496	0.0151735	0.141887	MYC/ATF3/NFIL3/CREM/ZBTB21/ETS2/JUN/HES1/BHLHE40	9
BP	GO:0051051	negative regulation of transport	11/208	469/18870	0.0152294	0.0515562	THBS1/LIF/PTGS2/STC1/RGS2/HES1/INSIG1/INHBA/KCNE4/IL1B/TNFRSF1B	11
MF	GO:0008201	heparin binding	6/212	174/18496	0.0152536	0.141887	THBS1/CXCL8/ADAMTS1/CCL8/HBEGF/CRISPLD2	6
BP	GO:0071478	cellular response to radiation	6/208	181/18870	0.0152928	0.051642	EGR1/MIR21/CDKN1A/SPIDR/MYC/GADD45A	6
BP	GO:0072593	reactive oxygen species metabolic process	7/208	234/18870	0.0152963	0.051642	MIR21/CDKN1A/IER3/THBS1/GADD45A/GCH1/CYP1B1	7
BP	GO:0044772	mitotic cell cycle phase transition	11/208	470/18870	0.0154484	0.0520852	CCL2/CDKN1A/IER3/ADAMTS1/MYC/KLF4/DCUN1D3/DUSP1/CKS2/INHBA/NABP1	11
BP	GO:0071277	cellular response to calcium ion	4/208	87/18870	0.0156828	0.0528041	FOSB/JUNB/FOS/ITPKC	4
BP	GO:0007178	transmembrane receptor protein serine/threonine kinase signaling pathway	10/208	410/18870	0.0158451	0.053141	EGR1/MIR21/THBS1/FOS/TNFAIP6/JUN/HES1/LRRC32/INHBA/FST	10
BP	GO:0006953	acute-phase response	3/208	48/18870	0.0158682	0.053141	IL6/PTGS2/IL1B	3
BP	GO:0032964	collagen biosynthetic process	3/208	48/18870	0.0158682	0.053141	IL6/FOSL2/INHBA	3
BP	GO:1903587	regulation of blood vessel endothelial cell proliferation involved in sprouting angiogenesis	3/208	48/18870	0.0158682	0.053141	MIR21/THBS1/HMOX1	3
MF	GO:0005149	interleukin-1 receptor binding	2/212	17/18496	0.0158797	0.141887	IL1RN/IL1B	2
MF	GO:0030169	low-density lipoprotein particle binding	2/212	17/18496	0.0158797	0.141887	THBS1/LDLR	2
MF	GO:0046965	nuclear retinoid X receptor binding	2/212	17/18496	0.0158797	0.141887	NR4A2/ARID5A	2
BP	GO:0002244	hematopoietic progenitor cell differentiation	5/208	133/18870	0.0160148	0.053513	ZFP36/CEBPD/HES1/INHBA/FST	5
BP	GO:0001659	temperature homeostasis	6/208	183/18870	0.016061	0.053513	EGR1/PTGS2/KDM6B/GADD45G/IL4R/IL1B	6
BP	GO:2000045	regulation of G1/S transition of mitotic cell cycle	6/208	183/18870	0.016061	0.053513	CCL2/CDKN1A/ADAMTS1/KLF4/DCUN1D3/INHBA	6
BP	GO:0001892	embryonic placenta development	4/208	88/18870	0.0162917	0.053513	SOCS3/JUNB/LIF/HES1	4
BP	GO:0046330	positive regulation of JNK cascade	4/208	88/18870	0.0162917	0.053513	GADD45B/GADD45A/GADD45G/IL1B	4
BP	GO:0006909	phagocytosis	7/208	237/18870	0.0162928	0.053513	CCL2/THBS1/PTX3/SPHK1/LDLR/CD93/IL1B	7
BP	GO:0002693	positive regulation of cellular extravasation	2/208	18/18870	0.0164733	0.053513	ICAM1/FADD	2
BP	GO:0002827	positive regulation of T-helper 1 type immune response	2/208	18/18870	0.0164733	0.053513	ARID5A/IL1B	2
BP	GO:0002830	positive regulation of type 2 immune response	2/208	18/18870	0.0164733	0.053513	IL6/IL4R	2
BP	GO:0020027	hemoglobin metabolic process	2/208	18/18870	0.0164733	0.053513	KLF4/INHBA	2
BP	GO:0035970	peptidyl-threonine dephosphorylation	2/208	18/18870	0.0164733	0.053513	DUSP5/DUSP1	2
BP	GO:0036499	PERK-mediated unfolded protein response	2/208	18/18870	0.0164733	0.053513	PPP1R15B/PPP1R15A	2
BP	GO:0038128	ERBB2 signaling pathway	2/208	18/18870	0.0164733	0.053513	HBEGF/AREG	2
BP	GO:0042574	retinal metabolic process	2/208	18/18870	0.0164733	0.053513	RDH10/CYP1B1	2
BP	GO:0044070	regulation of monoatomic anion transport	2/208	18/18870	0.0164733	0.053513	STC1/CA2	2
BP	GO:0045945	positive regulation of transcription by RNA polymerase III	2/208	18/18870	0.0164733	0.053513	DDX21/INHBA	2
BP	GO:0046851	negative regulation of bone remodeling	2/208	18/18870	0.0164733	0.053513	IL6/TNFAIP3	2
BP	GO:0048486	parasympathetic nervous system development	2/208	18/18870	0.0164733	0.053513	EGR2/HES1	2
BP	GO:0061323	cell proliferation involved in heart morphogenesis	2/208	18/18870	0.0164733	0.053513	PIM1/HES1	2
BP	GO:0071371	cellular response to gonadotropin stimulus	2/208	18/18870	0.0164733	0.053513	INHBA/CYP1B1	2
BP	GO:0150079	negative regulation of neuroinflammatory response	2/208	18/18870	0.0164733	0.053513	LDLR/TNFRSF1B	2
BP	GO:1905288	vascular associated smooth muscle cell apoptotic process	2/208	18/18870	0.0164733	0.053513	MIR21/SLC7A5	2
BP	GO:1905459	regulation of vascular associated smooth muscle cell apoptotic process	2/208	18/18870	0.0164733	0.053513	MIR21/SLC7A5	2
MF	GO:0008013	beta-catenin binding	4/212	85/18496	0.0165103	0.144168	NR4A2/KLF4/KDM6B/SOX17	4
BP	GO:0002673	regulation of acute inflammatory response	3/208	49/18870	0.0167686	0.0541197	IL6/PTGS2/IL1B	3
BP	GO:0010171	body morphogenesis	3/208	49/18870	0.0167686	0.0541197	CSRNP1/CRISPLD2/TIPARP	3
BP	GO:0046427	positive regulation of receptor signaling pathway via JAK-STAT	3/208	49/18870	0.0167686	0.0541197	IL6/HES1/CYP1B1	3
BP	GO:0048286	lung alveolus development	3/208	49/18870	0.0167686	0.0541197	LIF/FOSL2/ERRFI1	3
BP	GO:0050732	negative regulation of peptidyl-tyrosine phosphorylation	3/208	49/18870	0.0167686	0.0541197	SOCS3/GPRC5A/ERRFI1	3
BP	GO:1901990	regulation of mitotic cell cycle phase transition	9/208	355/18870	0.0172529	0.0556106	CCL2/CDKN1A/IER3/ADAMTS1/KLF4/DCUN1D3/DUSP1/INHBA/NABP1	9
MF	GO:0016705	oxidoreductase activity, acting on paired donors, with incorporation or reduction of molecular oxygen	6/212	179/18496	0.0173025	0.147729	CH25H/PTGS2/KDM7A/HMOX1/KDM6B/CYP1B1	6
CC	GO:0000164	protein phosphatase type 1 complex	2/213	19/19886	0.0173215	0.217582	PPP1R15B/PPP1R15A	2
BP	GO:0007498	mesoderm development	5/208	136/18870	0.0174717	0.0562432	KLF4/ETS2/KDM6B/EPHA2/INHBA	5
BP	GO:0002312	B cell activation involved in immune response	4/208	90/18870	0.0175533	0.0563602	IL6/BCL3/GPR183/NFKBIZ	4
BP	GO:0046889	positive regulation of lipid biosynthetic process	4/208	90/18870	0.0175533	0.0563602	PTGS2/LDLR/RDH10/IL1B	4
BP	GO:0071385	cellular response to glucocorticoid stimulus	3/208	50/18870	0.0176972	0.0566759	ZFP36/STC1/CYP1B1	3
BP	GO:1904752	regulation of vascular associated smooth muscle cell migration	3/208	50/18870	0.0176972	0.0566759	MIR21/NR4A3/ADAMTS1	3
MF	GO:0030297	transmembrane receptor protein tyrosine kinase activator activity	2/212	18/18496	0.0177313	0.148099	HBEGF/AREG	2
BP	GO:0050769	positive regulation of neurogenesis	7/208	242/18870	0.0180548	0.0577472	IL6/EGR2/SLC7A5/LIF/HES1/IL1B/TNFRSF1B	7
BP	GO:0030324	lung development	6/208	188/18870	0.0180975	0.057797	LIF/FOSL2/CRISPLD2/HES1/ERRFI1/RDH10	6
BP	GO:0007176	regulation of epidermal growth factor-activated receptor activity	2/208	19/18870	0.0182792	0.057797	GPRC5A/ERRFI1	2
BP	GO:0009226	nucleotide-sugar biosynthetic process	2/208	19/18870	0.0182792	0.057797	UAP1/GFPT2	2
BP	GO:0032516	positive regulation of phosphoprotein phosphatase activity	2/208	19/18870	0.0182792	0.057797	PPP1R15B/PPP1R15A	2
BP	GO:0032695	negative regulation of interleukin-12 production	2/208	19/18870	0.0182792	0.057797	MIR21/THBS1	2
BP	GO:0045064	T-helper 2 cell differentiation	2/208	19/18870	0.0182792	0.057797	BCL3/IL4R	2
BP	GO:0045721	negative regulation of gluconeogenesis	2/208	19/18870	0.0182792	0.057797	SIK1/MST1	2
BP	GO:0060602	branch elongation of an epithelium	2/208	19/18870	0.0182792	0.057797	AREG/RDH10	2
BP	GO:0060716	labyrinthine layer blood vessel development	2/208	19/18870	0.0182792	0.057797	JUNB/HES1	2
BP	GO:0010038	response to metal ion	9/208	359/18870	0.0184103	0.0581379	FOSB/THBS1/JUNB/FOS/PTGS2/JUN/HMOX1/ITPKC/MT2A	9
BP	GO:0033135	regulation of peptidyl-serine phosphorylation	5/208	138/18870	0.0184903	0.0583166	IL6/LIF/PTGS2/GADD45A/CSF3	5
MF	GO:0016763	pentosyltransferase activity	3/212	49/18496	0.0185821	0.148182	NAMPT/PNP/TIPARP	3
MF	GO:0019209	kinase activator activity	5/212	133/18496	0.0186277	0.148182	CDKN1A/GPRC5A/HBEGF/AREG/CKS2	5
BP	GO:0045581	negative regulation of T cell differentiation	3/208	51/18870	0.0186538	0.0587579	MIR21/IRF1/IL4R	3
BP	GO:0016485	protein processing	7/208	245/18870	0.0191742	0.0603209	THBS1/PLAUR/THBD/PLAU/SERPINE1/FADD/DISP1	7
MF	GO:0001664	G protein-coupled receptor binding	8/212	291/18496	0.019309	0.148182	CXCL2/CCL2/CXCL8/CCL8/CXCL3/CXCL1/CCL3/CCRL2	8
MF	GO:0016538	cyclin-dependent protein serine/threonine kinase regulator activity	3/212	50/18496	0.0196049	0.148182	CDKN1A/CCNL1/CKS2	3
BP	GO:0043154	negative regulation of cysteine-type endopeptidase activity involved in apoptotic process	3/208	52/18870	0.0196387	0.0614716	THBS1/PLAUR/KLF4	3
BP	GO:0051180	vitamin transport	3/208	52/18870	0.0196387	0.0614716	SLC2A14/SLC2A3/SLC19A2	3
BP	GO:0060324	face development	3/208	52/18870	0.0196387	0.0614716	CSRNP1/CRISPLD2/TIPARP	3
BP	GO:1904738	vascular associated smooth muscle cell migration	3/208	52/18870	0.0196387	0.0614716	MIR21/NR4A3/ADAMTS1	3
MF	GO:0060229	lipase activator activity	2/212	19/18496	0.0196696	0.148182	CCL8/CCL3	2
BP	GO:0030323	respiratory tube development	6/208	192/18870	0.0198491	0.0620269	LIF/FOSL2/CRISPLD2/HES1/ERRFI1/RDH10	6
BP	GO:0045926	negative regulation of growth	7/208	247/18870	0.019947	0.0620269	CDKN1A/RGS2/DCUN1D3/SOX17/SOCS2/INHBA/MT2A	7
BP	GO:0045727	positive regulation of translation	5/208	141/18870	0.0200904	0.0620269	IL6/THBS1/BCL3/PPP1R15A/CYP1B1	5
CC	GO:0000307	cyclin-dependent protein kinase holoenzyme complex	3/213	54/19886	0.0201394	0.234274	CDKN1A/CCNL1/CKS2	3
BP	GO:0048608	reproductive structure development	8/208	305/18870	0.0201464	0.0620269	ADAMTS1/PTX3/TNFAIP6/TIPARP/RDH10/INHBA/FST/CYP1B1	8
BP	GO:0002295	T-helper cell lineage commitment	2/208	20/18870	0.0201646	0.0620269	IL6/SOCS3	2
BP	GO:0003417	growth plate cartilage development	2/208	20/18870	0.0201646	0.0620269	FOSL2/STC1	2
BP	GO:0051546	keratinocyte migration	2/208	20/18870	0.0201646	0.0620269	HAS2/HBEGF	2
BP	GO:0051767	nitric-oxide synthase biosynthetic process	2/208	20/18870	0.0201646	0.0620269	CCL2/NAMPT	2
BP	GO:0051769	regulation of nitric-oxide synthase biosynthetic process	2/208	20/18870	0.0201646	0.0620269	CCL2/NAMPT	2
BP	GO:0055093	response to hyperoxia	2/208	20/18870	0.0201646	0.0620269	CDKN1A/SLC7A5	2
BP	GO:0060353	regulation of cell adhesion molecule production	2/208	20/18870	0.0201646	0.0620269	CXCL8/IL1B	2
BP	GO:0060749	mammary gland alveolus development	2/208	20/18870	0.0201646	0.0620269	AREG/SOCS2	2
BP	GO:0061377	mammary gland lobule development	2/208	20/18870	0.0201646	0.0620269	AREG/SOCS2	2
BP	GO:0097154	GABAergic neuron differentiation	2/208	20/18870	0.0201646	0.0620269	INHBA/ZSWIM6	2
BP	GO:0009791	post-embryonic development	4/208	94/18870	0.0202554	0.0621527	CSRNP1/NR4A2/KLF4/TIPARP	4
BP	GO:0060761	negative regulation of response to cytokine stimulus	4/208	94/18870	0.0202554	0.0621527	IL6/MIR21/IL1RN/KLF4	4
BP	GO:1902074	response to salt	9/208	366/18870	0.0205704	0.0628273	FOSB/EGR1/THBS1/JUNB/FOS/PTGS2/ITPKC/FADD/IL1B	9
BP	GO:0043405	regulation of MAP kinase activity	5/208	142/18870	0.0206433	0.0628273	THBS1/RGS2/DUSP1/SPRY4/IL1B	5
BP	GO:0021872	forebrain generation of neurons	3/208	53/18870	0.0206518	0.0628273	HES1/INHBA/ZSWIM6	3
BP	GO:0044818	mitotic G2/M transition checkpoint	3/208	53/18870	0.0206518	0.0628273	CDKN1A/IER3/NABP1	3
BP	GO:0048260	positive regulation of receptor-mediated endocytosis	3/208	53/18870	0.0206518	0.0628273	SELE/SERPINE1/DGKD	3
BP	GO:0071622	regulation of granulocyte chemotaxis	3/208	53/18870	0.0206518	0.0628273	THBS1/CXCL8/TNFAIP6	3
BP	GO:1904894	positive regulation of receptor signaling pathway via STAT	3/208	53/18870	0.0206518	0.0628273	IL6/HES1/CYP1B1	3
MF	GO:0016922	nuclear receptor binding	5/212	137/18496	0.020881	0.151883	NR4A2/NR4A3/ARID5A/NR4A1/ETS2	5
MF	GO:0005539	glycosaminoglycan binding	7/212	240/18496	0.0209568	0.151883	THBS1/CXCL8/ADAMTS1/CCL8/HBEGF/TNFAIP6/CRISPLD2	7
CC	GO:1904724	tertiary granule lumen	3/213	55/19886	0.021137	0.234274	PTX3/TNFAIP6/CXCL1	3
BP	GO:0045017	glycerolipid biosynthetic process	7/208	250/18870	0.0211466	0.0642543	SIK1/SOCS3/LDLR/ITPKC/PIGA/SOCS2/DGKD	7
BP	GO:0034341	response to type II interferon	5/208	143/18870	0.021206	0.06432	CCL2/IRF1/CCL8/GCH1/CCL3	5
BP	GO:0002449	lymphocyte mediated immunity	9/208	368/18870	0.0212199	0.06432	IL6/ICAM1/ARID5A/BCL3/FADD/NFKBIZ/IL4R/IL1B/TNFRSF1B	9
BP	GO:0051924	regulation of calcium ion transport	7/208	251/18870	0.0215574	0.0652565	MIR21/CCL2/VMP1/PTGS2/STC1/HES1/CCL3	7
BP	GO:0061458	reproductive system development	8/208	309/18870	0.0215812	0.0652565	ADAMTS1/PTX3/TNFAIP6/TIPARP/RDH10/INHBA/FST/CYP1B1	8
MF	GO:0004879	nuclear receptor activity	3/212	52/18496	0.0217422	0.151883	NR4A2/NR4A3/NR4A1	3
MF	GO:0098531	ligand-activated transcription factor activity	3/212	52/18496	0.0217422	0.151883	NR4A2/NR4A3/NR4A1	3
BP	GO:0051592	response to calcium ion	5/208	144/18870	0.0217787	0.0657737	FOSB/THBS1/JUNB/FOS/ITPKC	5
BP	GO:0000082	G1/S transition of mitotic cell cycle	7/208	252/18870	0.0219737	0.0661063	CCL2/CDKN1A/ADAMTS1/MYC/KLF4/DCUN1D3/INHBA	7
BP	GO:0010001	glial cell differentiation	7/208	252/18870	0.0219737	0.0661063	IL6/EGR2/LIF/LDLR/HES1/IL1B/TNFRSF1B	7
BP	GO:0033005	positive regulation of mast cell activation	2/208	21/18870	0.0221276	0.0661063	NR4A3/IL4R	2
BP	GO:0034104	negative regulation of tissue remodeling	2/208	21/18870	0.0221276	0.0661063	IL6/TNFAIP3	2
BP	GO:0043555	regulation of translation in response to stress	2/208	21/18870	0.0221276	0.0661063	PPP1R15B/PPP1R15A	2
BP	GO:0044321	response to leptin	2/208	21/18870	0.0221276	0.0661063	NR4A3/UGCG	2
BP	GO:0051152	positive regulation of smooth muscle cell differentiation	2/208	21/18870	0.0221276	0.0661063	MIR21/MIR22	2
BP	GO:0060444	branching involved in mammary gland duct morphogenesis	2/208	21/18870	0.0221276	0.0661063	AREG/EPHA2	2
BP	GO:1903975	regulation of glial cell migration	2/208	21/18870	0.0221276	0.0661063	GPR183/CCL3	2
BP	GO:0045834	positive regulation of lipid metabolic process	5/208	145/18870	0.0223613	0.0665651	NR4A3/PTGS2/LDLR/RDH10/IL1B	5
BP	GO:0050921	positive regulation of chemotaxis	5/208	145/18870	0.0223613	0.0665651	IL6/THBS1/CXCL8/SERPINE1/CCL3	5
BP	GO:0061008	hepaticobiliary system development	5/208	145/18870	0.0223613	0.0665651	IL6/TNFAIP3/SLC7A5/HES1/SOX17	5
BP	GO:0042304	regulation of fatty acid biosynthetic process	3/208	55/18870	0.0227628	0.0676794	PTGS2/INSIG1/IL1B	3
BP	GO:1902075	cellular response to salt	6/208	199/18870	0.0231861	0.0688159	FOSB/EGR1/JUNB/FOS/PTGS2/ITPKC	6
BP	GO:0048534	hematopoietic or lymphoid organ development	4/208	98/18870	0.0232003	0.0688159	BCL3/HES1/FADD/NFKBIZ	4
MF	GO:0001846	opsonin binding	2/212	21/18496	0.0237972	0.158995	PTX3/CD93	2
BP	GO:0001541	ovarian follicle development	3/208	56/18870	0.0238607	0.0704394	PTX3/TNFAIP6/INHBA	3
BP	GO:0045912	negative regulation of carbohydrate metabolic process	3/208	56/18870	0.0238607	0.0704394	SIK1/IER3/MST1	3
BP	GO:0052372	modulation by symbiont of entry into host	3/208	56/18870	0.0238607	0.0704394	CH25H/CXCL8/PTX3	3
BP	GO:0070542	response to fatty acid	3/208	56/18870	0.0238607	0.0704394	PTGS2/LDLR/HES1	3
MF	GO:0002020	protease binding	5/212	142/18496	0.0239387	0.158995	THBS1/TNFAIP3/LDLR/SERPINE1/FADD	5
MF	GO:1990756	ubiquitin ligase-substrate adaptor activity	3/212	54/18496	0.0240018	0.158995	SPSB1/ARRDC4/KLHL15	3
BP	GO:0009713	catechol-containing compound biosynthetic process	2/208	22/18870	0.0241662	0.0705885	NR4A2/GCH1	2
BP	GO:0010866	regulation of triglyceride biosynthetic process	2/208	22/18870	0.0241662	0.0705885	SIK1/LDLR	2
BP	GO:0021756	striatum development	2/208	22/18870	0.0241662	0.0705885	INHBA/ZSWIM6	2
BP	GO:0034312	diol biosynthetic process	2/208	22/18870	0.0241662	0.0705885	SPHK1/GCH1	2
BP	GO:0042423	catecholamine biosynthetic process	2/208	22/18870	0.0241662	0.0705885	NR4A2/GCH1	2
BP	GO:0072111	cell proliferation involved in kidney development	2/208	22/18870	0.0241662	0.0705885	EGR1/MYC	2
BP	GO:0072234	metanephric nephron tubule development	2/208	22/18870	0.0241662	0.0705885	LIF/HES1	2
BP	GO:0098856	intestinal lipid absorption	2/208	22/18870	0.0241662	0.0705885	UGCG/LDLR	2
BP	GO:1903589	positive regulation of blood vessel endothelial cell proliferation involved in sprouting angiogenesis	2/208	22/18870	0.0241662	0.0705885	MIR21/HMOX1	2
BP	GO:1903522	regulation of blood circulation	7/208	258/18870	0.0245893	0.0717402	MIR21/PTGS2/HBEGF/STC1/RGS2/GCH1/KCNE4	7
MF	GO:0004725	protein tyrosine phosphatase activity	4/212	96/18496	0.0246017	0.160207	DUSP5/DUSP2/DUSP1/DUSP6	4
BP	GO:0019217	regulation of fatty acid metabolic process	4/208	100/18870	0.0247652	0.0719966	NR4A3/PTGS2/INSIG1/IL1B	4
BP	GO:0050764	regulation of phagocytosis	4/208	100/18870	0.0247652	0.0719966	CCL2/PTX3/SPHK1/IL1B	4
BP	GO:0046467	membrane lipid biosynthetic process	5/208	149/18870	0.0247927	0.0719966	UGCG/SPHK1/B3GNT5/PIGA/SGMS2	5
BP	GO:0050768	negative regulation of neurogenesis	5/208	149/18870	0.0247927	0.0719966	IL6/LDLR/BTG2/HES1/IL1B	5
BP	GO:0061005	cell differentiation involved in kidney development	3/208	57/18870	0.0249869	0.0724758	LIF/GPR4/HES1	3
BP	GO:0006470	protein dephosphorylation	6/208	203/18870	0.0252529	0.0731622	DUSP5/PPP1R15B/DUSP2/PPP1R15A/DUSP1/DUSP6	6
BP	GO:0045667	regulation of osteoblast differentiation	5/208	150/18870	0.0254261	0.0735785	IL6/MIR21/CEBPD/TNFAIP6/AREG	5
MF	GO:0016758	hexosyltransferase activity	6/212	196/18496	0.025669	0.164372	HAS2/UGCG/CHSY1/B3GNT5/PIGA/HAS1	6
BP	GO:0002705	positive regulation of leukocyte mediated immunity	5/208	151/18870	0.0260697	0.0748286	IL6/ARID5A/DDX21/FADD/IL1B	5
BP	GO:0048008	platelet-derived growth factor receptor signaling pathway	3/208	58/18870	0.0261413	0.0748286	CSRNP1/NR4A3/TIPARP	3
BP	GO:0019430	removal of superoxide radicals	2/208	23/18870	0.0262785	0.0748286	MIR21/GCH1	2
BP	GO:0033139	regulation of peptidyl-serine phosphorylation of STAT protein	2/208	23/18870	0.0262785	0.0748286	LIF/GADD45A	2
BP	GO:0036120	cellular response to platelet-derived growth factor stimulus	2/208	23/18870	0.0262785	0.0748286	HAS2/HAS1	2
BP	GO:0043373	CD4-positive, alpha-beta T cell lineage commitment	2/208	23/18870	0.0262785	0.0748286	IL6/SOCS3	2
BP	GO:0045063	T-helper 1 cell differentiation	2/208	23/18870	0.0262785	0.0748286	NFKBIZ/IL4R	2
BP	GO:0045932	negative regulation of muscle contraction	2/208	23/18870	0.0262785	0.0748286	PTGS2/RGS2	2
BP	GO:0046597	negative regulation of viral entry into host cell	2/208	23/18870	0.0262785	0.0748286	CH25H/PTX3	2
BP	GO:0060352	cell adhesion molecule production	2/208	23/18870	0.0262785	0.0748286	CXCL8/IL1B	2
BP	GO:0061042	vascular wound healing	2/208	23/18870	0.0262785	0.0748286	TNFAIP3/SERPINE1	2
BP	GO:0071636	positive regulation of transforming growth factor beta production	2/208	23/18870	0.0262785	0.0748286	THBS1/PTGS2	2
BP	GO:0072574	hepatocyte proliferation	2/208	23/18870	0.0262785	0.0748286	IL6/TNFAIP3	2
BP	GO:0072575	epithelial cell proliferation involved in liver morphogenesis	2/208	23/18870	0.0262785	0.0748286	IL6/TNFAIP3	2
BP	GO:0022408	negative regulation of cell-cell adhesion	6/208	205/18870	0.0263309	0.0748922	MIR21/IL1RN/IRF1/KLF4/LRRC32/IL4R	6
BP	GO:0019080	viral gene expression	4/208	102/18870	0.0263925	0.0749818	ZFP36/CHD1/JUN/CCL3	4
BP	GO:0051098	regulation of binding	7/208	262/18870	0.0264473	0.075052	CDKN1A/PLAUR/BCL3/JUN/HES1/SLPI/CSF3	7
BP	GO:1903038	negative regulation of leukocyte cell-cell adhesion	5/208	152/18870	0.0267237	0.0757499	MIR21/IRF1/KLF4/LRRC32/IL4R	5
BP	GO:0010718	positive regulation of epithelial to mesenchymal transition	3/208	59/18870	0.0273239	0.0771877	IL6/MIR21/IL1B	3
BP	GO:0032608	interferon-beta production	3/208	59/18870	0.0273239	0.0771877	IRF1/ARRDC4/REL	3
BP	GO:0032648	regulation of interferon-beta production	3/208	59/18870	0.0273239	0.0771877	IRF1/ARRDC4/REL	3
BP	GO:0071383	cellular response to steroid hormone stimulus	6/208	208/18870	0.0280047	0.0788839	NR4A3/ZFP36/STC1/SGK1/CYP1B1/MGARP	6
MF	GO:0004722	protein serine/threonine phosphatase activity	4/212	100/18496	0.0280439	0.175035	DUSP5/DUSP2/DUSP1/DUSP6	4
BP	GO:0019218	regulation of steroid metabolic process	4/208	104/18870	0.0280826	0.0788839	CH25H/EGR1/LDLR/INSIG1	4
BP	GO:0033138	positive regulation of peptidyl-serine phosphorylation	4/208	104/18870	0.0280826	0.0788839	IL6/LIF/PTGS2/CSF3	4
BP	GO:0042100	B cell proliferation	4/208	104/18870	0.0280826	0.0788839	CDKN1A/FOSL2/GPR183/NFKBIZ	4
BP	GO:0090100	positive regulation of transmembrane receptor protein serine/threonine kinase signaling pathway	4/208	104/18870	0.0280826	0.0788839	MIR21/THBS1/HES1/INHBA	4
MF	GO:0140311	protein sequestering activity	2/212	23/18496	0.0282453	0.175035	CDKN1A/INSIG1	2
BP	GO:0032891	negative regulation of organic acid transport	2/208	24/18870	0.0284627	0.0791486	THBS1/RGS2	2
BP	GO:0040037	negative regulation of fibroblast growth factor receptor signaling pathway	2/208	24/18870	0.0284627	0.0791486	THBS1/SPRY4	2
BP	GO:0042501	serine phosphorylation of STAT protein	2/208	24/18870	0.0284627	0.0791486	LIF/GADD45A	2
BP	GO:0045723	positive regulation of fatty acid biosynthetic process	2/208	24/18870	0.0284627	0.0791486	PTGS2/IL1B	2
BP	GO:0051043	regulation of membrane protein ectodomain proteolysis	2/208	24/18870	0.0284627	0.0791486	IL1B/TNFRSF1B	2
BP	GO:0061099	negative regulation of protein tyrosine kinase activity	2/208	24/18870	0.0284627	0.0791486	GPRC5A/ERRFI1	2
BP	GO:0072273	metanephric nephron morphogenesis	2/208	24/18870	0.0284627	0.0791486	LIF/HES1	2
BP	GO:2000209	regulation of anoikis	2/208	24/18870	0.0284627	0.0791486	SIK1/MCL1	2
BP	GO:2000353	positive regulation of endothelial cell apoptotic process	2/208	24/18870	0.0284627	0.0791486	CCL2/THBS1	2
BP	GO:0008347	glial cell migration	3/208	60/18870	0.0285346	0.07926	CCL2/GPR183/CCL3	3
BP	GO:1902806	regulation of cell cycle G1/S phase transition	6/208	209/18870	0.0285779	0.0792919	CCL2/CDKN1A/ADAMTS1/KLF4/DCUN1D3/INHBA	6
BP	GO:0007584	response to nutrient	5/208	155/18870	0.0287481	0.0795869	PIM1/PTGS2/STC1/NFKBIZ/CYP1B1	5
BP	GO:0051961	negative regulation of nervous system development	5/208	155/18870	0.0287481	0.0795869	IL6/LDLR/BTG2/HES1/IL1B	5
CC	GO:0035580	specific granule lumen	3/213	62/19886	0.028867	0.302175	PTX3/CXCL1/SLPI	3
BP	GO:0060485	mesenchyme development	8/208	327/18870	0.02894	0.0800291	IL6/MIR21/HAS2/MYC/HES1/RDH10/IL1B/BNC2	8
BP	GO:0019722	calcium-mediated signaling	6/208	210/18870	0.0291588	0.0805448	SELE/CXCL8/SPHK1/LMCD1/CCL3/CCRL2	6
BP	GO:0046718	viral entry into host cell	5/208	156/18870	0.0294439	0.0811525	CH25H/PTX3/ICAM1/LDLR/EPHA2	5
BP	GO:0072006	nephron development	5/208	156/18870	0.0294439	0.0811525	EGR1/MYC/LIF/GPR4/HES1	5
BP	GO:0006611	protein export from nucleus	3/208	61/18870	0.0297735	0.0816904	EGR2/NXT1/IL1B	3
BP	GO:0034113	heterotypic cell-cell adhesion	3/208	61/18870	0.0297735	0.0816904	IL1RN/KLF4/IL1B	3
BP	GO:1903670	regulation of sprouting angiogenesis	3/208	61/18870	0.0297735	0.0816904	THBS1/ADAMTS9/KLF4	3
BP	GO:1905517	macrophage migration	3/208	61/18870	0.0297735	0.0816904	CCL2/THBS1/CCL3	3
BP	GO:0002532	production of molecular mediator involved in inflammatory response	4/208	106/18870	0.0298358	0.0816904	IL6/MIR21/SERPINE1/IL4R	4
BP	GO:0032963	collagen metabolic process	4/208	106/18870	0.0298358	0.0816904	IL6/MIR21/FOSL2/INHBA	4
BP	GO:0003018	vascular process in circulatory system	7/208	269/18870	0.0299256	0.0818464	MIR21/SLC2A3/SLC7A5/PTGS2/GPR4/RGS2/GCH1	7
MF	GO:0070888	E-box binding	3/212	59/18496	0.0301849	0.178043	MYC/HES1/BHLHE40	3
BP	GO:0001701	in utero embryonic development	9/208	392/18870	0.0302037	0.0825164	SOCS3/MAFF/JUNB/LIF/FOSL1/KLF4/HES1/SOX17/RDH10	9
BP	GO:0006913	nucleocytoplasmic transport	8/208	330/18870	0.0303163	0.0826123	CDKN1A/IER3/EGR2/BCL3/PTGS2/NXT1/ABRA/IL1B	8
BP	GO:0051169	nuclear transport	8/208	330/18870	0.0303163	0.0826123	CDKN1A/IER3/EGR2/BCL3/PTGS2/NXT1/ABRA/IL1B	8
MF	GO:0005516	calmodulin binding	6/212	204/18496	0.0304035	0.178043	GEM/RGS16/SPHK1/RGS2/RGS1/ITPKC	6
MF	GO:0019957	C-C chemokine binding	2/212	24/18496	0.0305844	0.178043	ZFP36/CCRL2	2
MF	GO:0050431	transforming growth factor beta binding	2/212	24/18496	0.0305844	0.178043	THBS1/LRRC32	2
BP	GO:0002363	alpha-beta T cell lineage commitment	2/208	25/18870	0.030717	0.0826123	IL6/SOCS3	2
BP	GO:0036119	response to platelet-derived growth factor	2/208	25/18870	0.030717	0.0826123	HAS2/HAS1	2
BP	GO:0036315	cellular response to sterol	2/208	25/18870	0.030717	0.0826123	INSIG1/INHBA	2
BP	GO:0043153	entrainment of circadian clock by photoperiod	2/208	25/18870	0.030717	0.0826123	SIK1/BHLHE40	2
BP	GO:0070233	negative regulation of T cell apoptotic process	2/208	25/18870	0.030717	0.0826123	BCL3/FADD	2
BP	GO:0071450	cellular response to oxygen radical	2/208	25/18870	0.030717	0.0826123	MIR21/GCH1	2
BP	GO:0071451	cellular response to superoxide	2/208	25/18870	0.030717	0.0826123	MIR21/GCH1	2
BP	GO:0071676	negative regulation of mononuclear cell migration	2/208	25/18870	0.030717	0.0826123	CCL2/DUSP1	2
BP	GO:0072170	metanephric tubule development	2/208	25/18870	0.030717	0.0826123	LIF/HES1	2
BP	GO:0072243	metanephric nephron epithelium development	2/208	25/18870	0.030717	0.0826123	LIF/HES1	2
BP	GO:0072576	liver morphogenesis	2/208	25/18870	0.030717	0.0826123	IL6/TNFAIP3	2
BP	GO:1901985	positive regulation of protein acetylation	2/208	25/18870	0.030717	0.0826123	ARID5A/DDX21	2
BP	GO:0006672	ceramide metabolic process	4/208	107/18870	0.0307362	0.0826123	UGCG/SPHK1/GLA/SGMS2	4
BP	GO:0098754	detoxification	5/208	158/18870	0.0308673	0.0828753	MIR21/PIM1/PTGS2/GCH1/MT2A	5
BP	GO:0032731	positive regulation of interleukin-1 beta production	3/208	62/18870	0.0310403	0.0831607	IL6/EGR1/CCL3	3
BP	GO:1903053	regulation of extracellular matrix organization	3/208	62/18870	0.0310403	0.0831607	IL6/HAS2/TNFRSF1B	3
BP	GO:0060348	bone development	6/208	215/18870	0.0321798	0.0861209	HAS2/FOSL2/STC1/CHSY1/INSIG1/BNC2	6
BP	GO:0051607	defense response to virus	8/208	334/18870	0.0322206	0.0861374	IL6/TNFAIP3/IRF1/DDX21/FADD/ISG20/MLKL/IL1B	8
BP	GO:0006687	glycosphingolipid metabolic process	3/208	63/18870	0.0323352	0.0862587	CREM/UGCG/GLA	3
BP	GO:0046173	polyol biosynthetic process	3/208	63/18870	0.0323352	0.0862587	SPHK1/GCH1/ITPKC	3
BP	GO:0001776	leukocyte homeostasis	4/208	109/18870	0.0325847	0.086571	IL6/TNFAIP3/GPR183/FADD	4
BP	GO:0006939	smooth muscle contraction	4/208	109/18870	0.0325847	0.086571	MIR21/PTGS2/SPHK1/RGS2	4
BP	GO:0035967	cellular response to topologically incorrect protein	4/208	109/18870	0.0325847	0.086571	ATF3/PPP1R15B/PPP1R15A/KLHL15	4
BP	GO:0007611	learning or memory	7/208	274/18870	0.0325912	0.086571	EGR2/FOS/PTGS2/FOSL1/LDLR/BTG2/SGK1	7
BP	GO:0140546	defense response to symbiont	8/208	335/18870	0.0327091	0.0867917	IL6/TNFAIP3/IRF1/DDX21/FADD/ISG20/MLKL/IL1B	8
BP	GO:0010959	regulation of metal ion transport	9/208	398/18870	0.0328116	0.0869708	SIK1/MIR21/CCL2/VMP1/PTGS2/STC1/HES1/KCNE4/CCL3	9
MF	GO:0005355	glucose transmembrane transporter activity	2/212	25/18496	0.0329974	0.183738	SLC2A14/SLC2A3	2
MF	GO:0015149	hexose transmembrane transporter activity	2/212	25/18496	0.0329974	0.183738	SLC2A14/SLC2A3	2
MF	GO:0070412	R-SMAD binding	2/212	25/18496	0.0329974	0.183738	FOS/JUN	2
BP	GO:0033598	mammary gland epithelial cell proliferation	2/208	26/18870	0.0330395	0.0870195	AREG/EPHA2	2
BP	GO:0043369	CD4-positive or CD8-positive, alpha-beta T cell lineage commitment	2/208	26/18870	0.0330395	0.0870195	IL6/SOCS3	2
BP	GO:1900407	regulation of cellular response to oxidative stress	2/208	26/18870	0.0330395	0.0870195	MIR21/GCH1	2
BP	GO:1901623	regulation of lymphocyte chemotaxis	2/208	26/18870	0.0330395	0.0870195	CCL2/CCL3	2
BP	GO:1905523	positive regulation of macrophage migration	2/208	26/18870	0.0330395	0.0870195	THBS1/CCL3	2
BP	GO:2000737	negative regulation of stem cell differentiation	2/208	26/18870	0.0330395	0.0870195	ZFP36/HES1	2
BP	GO:0034764	positive regulation of transmembrane transport	6/208	217/18870	0.0334432	0.0879898	MIR21/CCL2/NR4A3/VMP1/SLC7A5/CA2	6
BP	GO:0001885	endothelial cell development	3/208	64/18870	0.0336579	0.0881822	ICAM1/STC1/IL1B	3
BP	GO:0032615	interleukin-12 production	3/208	64/18870	0.0336579	0.0881822	MIR21/THBS1/IRF1	3
BP	GO:0032655	regulation of interleukin-12 production	3/208	64/18870	0.0336579	0.0881822	MIR21/THBS1/IRF1	3
BP	GO:1904036	negative regulation of epithelial cell apoptotic process	3/208	64/18870	0.0336579	0.0881822	ICAM1/TNFAIP3/SERPINE1	3
BP	GO:0006665	sphingolipid metabolic process	5/208	162/18870	0.033842	0.0885713	CREM/UGCG/SPHK1/GLA/SGMS2	5
BP	GO:0042594	response to starvation	6/208	218/18870	0.0340868	0.0891185	CDKN1A/ZFP36/SLC7A5/FOS/ATF3/KLF10	6
BP	GO:0051960	regulation of nervous system development	10/208	466/18870	0.0342906	0.0895575	IL6/EGR2/SLC7A5/LIF/LDLR/BTG2/HES1/BHLHE40/IL1B/TNFRSF1B	10
BP	GO:0001938	positive regulation of endothelial cell proliferation	4/208	111/18870	0.034497	0.089814	EGR3/MIR21/NR4A1/HMOX1	4
BP	GO:0033209	tumor necrosis factor-mediated signaling pathway	4/208	111/18870	0.034497	0.089814	TNFAIP3/SPHK1/BIRC3/TNFRSF1B	4
BP	GO:0060840	artery development	4/208	111/18870	0.034497	0.089814	EGR2/ADAMTS9/LDLR/HES1	4
BP	GO:0007292	female gamete generation	5/208	163/18870	0.0346125	0.0899268	ADAMTS1/PTX3/FOSL1/TNFAIP6/INHBA	5
BP	GO:0043281	regulation of cysteine-type endopeptidase activity involved in apoptotic process	5/208	163/18870	0.0346125	0.0899268	THBS1/PLAUR/MYC/KLF4/SOX7	5
BP	GO:0051402	neuron apoptotic process	7/208	278/18870	0.0348348	0.0902963	EGR1/NR4A2/CCL2/MCL1/BTG2/FADD/CCL3	7
BP	GO:0010812	negative regulation of cell-substrate adhesion	3/208	65/18870	0.0350084	0.0902963	THBS1/SERPINE1/SPRY4	3
BP	GO:0032613	interleukin-10 production	3/208	65/18870	0.0350084	0.0902963	IL6/BCL3/CD83	3
BP	GO:0032653	regulation of interleukin-10 production	3/208	65/18870	0.0350084	0.0902963	IL6/BCL3/CD83	3
BP	GO:0035904	aorta development	3/208	65/18870	0.0350084	0.0902963	EGR2/ADAMTS9/HES1	3
BP	GO:0043903	regulation of biological process involved in symbiotic interaction	3/208	65/18870	0.0350084	0.0902963	CH25H/CXCL8/PTX3	3
BP	GO:2000117	negative regulation of cysteine-type endopeptidase activity	3/208	65/18870	0.0350084	0.0902963	THBS1/PLAUR/KLF4	3
BP	GO:0044843	cell cycle G1/S phase transition	7/208	279/18870	0.0354114	0.0905363	CCL2/CDKN1A/ADAMTS1/MYC/KLF4/DCUN1D3/INHBA	7
BP	GO:0010818	T cell chemotaxis	2/208	27/18870	0.0354285	0.0905363	GPR183/CCL3	2
BP	GO:0036296	response to increased oxygen levels	2/208	27/18870	0.0354285	0.0905363	CDKN1A/SLC7A5	2
BP	GO:0042059	negative regulation of epidermal growth factor receptor signaling pathway	2/208	27/18870	0.0354285	0.0905363	GPRC5A/ERRFI1	2
BP	GO:0042104	positive regulation of activated T cell proliferation	2/208	27/18870	0.0354285	0.0905363	MIR21/FADD	2
BP	GO:0045672	positive regulation of osteoclast differentiation	2/208	27/18870	0.0354285	0.0905363	FOS/KLF10	2
BP	GO:0045742	positive regulation of epidermal growth factor receptor signaling pathway	2/208	27/18870	0.0354285	0.0905363	PLAUR/DGKD	2
BP	GO:0048745	smooth muscle tissue development	2/208	27/18870	0.0354285	0.0905363	FOSL2/TIPARP	2
BP	GO:2000272	negative regulation of signaling receptor activity	2/208	27/18870	0.0354285	0.0905363	GPRC5A/ERRFI1	2
MF	GO:0001848	complement binding	2/212	26/18496	0.0354823	0.189343	PTX3/CD93	2
MF	GO:0008395	steroid hydroxylase activity	2/212	26/18496	0.0354823	0.189343	CH25H/CYP1B1	2
MF	GO:0042974	nuclear retinoic acid receptor binding	2/212	26/18496	0.0354823	0.189343	NR4A2/ARID5A	2
BP	GO:0042531	positive regulation of tyrosine phosphorylation of STAT protein	3/208	66/18870	0.0363866	0.0927943	IL6/LIF/HES1	3
BP	GO:0046854	phosphatidylinositol phosphate biosynthetic process	3/208	66/18870	0.0363866	0.0927943	SOCS3/ITPKC/SOCS2	3
BP	GO:0032355	response to estradiol	4/208	113/18870	0.0364734	0.0928256	PTGS2/AREG/SOCS2/CYP1B1	4
BP	GO:1901222	regulation of non-canonical NF-kappaB signal transduction	4/208	113/18870	0.0364734	0.0928256	MIR21/BCL3/SPHK1/IL1B	4
BP	GO:0043010	camera-type eye development	8/208	344/18870	0.0373356	0.0943867	SLC25A25/KLF4/HES1/RDH10/EPHA2/INHBA/FJX1/CYP1B1	8
BP	GO:0010972	negative regulation of G2/M transition of mitotic cell cycle	3/208	67/18870	0.0377924	0.0943867	CDKN1A/IER3/NABP1	3
BP	GO:0046888	negative regulation of hormone secretion	3/208	67/18870	0.0377924	0.0943867	LIF/INHBA/IL1B	3
BP	GO:0030509	BMP signaling pathway	5/208	167/18870	0.0378031	0.0943867	EGR1/MIR21/TNFAIP6/HES1/FST	5
BP	GO:0000303	response to superoxide	2/208	28/18870	0.0378823	0.0943867	MIR21/GCH1	2
BP	GO:0009648	photoperiodism	2/208	28/18870	0.0378823	0.0943867	SIK1/BHLHE40	2
BP	GO:0010922	positive regulation of phosphatase activity	2/208	28/18870	0.0378823	0.0943867	PPP1R15B/PPP1R15A	2
BP	GO:0014850	response to muscle activity	2/208	28/18870	0.0378823	0.0943867	SLC7A5/METRNL	2
BP	GO:0015732	prostaglandin transport	2/208	28/18870	0.0378823	0.0943867	PTGS2/IL1B	2
BP	GO:0021544	subpallium development	2/208	28/18870	0.0378823	0.0943867	INHBA/ZSWIM6	2
BP	GO:0032703	negative regulation of interleukin-2 production	2/208	28/18870	0.0378823	0.0943867	ZFP36/TNFAIP3	2
BP	GO:0034698	response to gonadotropin	2/208	28/18870	0.0378823	0.0943867	INHBA/CYP1B1	2
BP	GO:0042398	cellular modified amino acid biosynthetic process	2/208	28/18870	0.0378823	0.0943867	GCH1/CKMT1A	2
BP	GO:0042832	defense response to protozoan	2/208	28/18870	0.0378823	0.0943867	BCL3/IL4R	2
BP	GO:0044342	type B pancreatic cell proliferation	2/208	28/18870	0.0378823	0.0943867	NR4A3/NR4A1	2
BP	GO:0045686	negative regulation of glial cell differentiation	2/208	28/18870	0.0378823	0.0943867	LDLR/HES1	2
BP	GO:0060964	regulation of miRNA-mediated gene silencing	2/208	28/18870	0.0378823	0.0943867	IL6/ZFP36	2
BP	GO:0070423	nucleotide-binding oligomerization domain containing signaling pathway	2/208	28/18870	0.0378823	0.0943867	TNFAIP3/BIRC3	2
BP	GO:1903019	negative regulation of glycoprotein metabolic process	2/208	28/18870	0.0378823	0.0943867	PTX3/HBEGF	2
BP	GO:1903671	negative regulation of sprouting angiogenesis	2/208	28/18870	0.0378823	0.0943867	THBS1/ADAMTS9	2
BP	GO:1903901	negative regulation of viral life cycle	2/208	28/18870	0.0378823	0.0943867	CH25H/PTX3	2
BP	GO:0007389	pattern specification process	10/208	475/18870	0.0382638	0.095242	EGR2/STC1/CHSY1/ETS2/BTG2/HES1/SOX17/DISP1/BHLHE40/FST	10
CC	GO:0005942	phosphatidylinositol 3-kinase complex	2/213	29/19886	0.0383583	0.35424	SOCS3/SOCS2	2
BP	GO:1901873	regulation of post-translational protein modification	7/208	284/18870	0.038389	0.0954584	EGR1/TNFAIP3/DDX21/ARRDC4/SPHK1/DCUN1D3/BIRC3	7
MF	GO:0140767	enzyme-substrate adaptor activity	3/212	65/18496	0.0386029	0.203173	SPSB1/ARRDC4/KLHL15	3
CC	GO:0009898	cytoplasmic side of plasma membrane	5/213	173/19886	0.0387602	0.35424	SOCS3/GEM/RGS2/RGS1/FADD	5
BP	GO:0046513	ceramide biosynthetic process	3/208	68/18870	0.0392256	0.0972474	UGCG/SPHK1/SGMS2	3
BP	GO:0051055	negative regulation of lipid biosynthetic process	3/208	68/18870	0.0392256	0.0972474	SIK1/SPHK1/INSIG1	3
BP	GO:0051926	negative regulation of calcium ion transport	3/208	68/18870	0.0392256	0.0972474	PTGS2/STC1/HES1	3
BP	GO:0034250	positive regulation of amide metabolic process	5/208	169/18870	0.0394638	0.0977408	IL6/THBS1/BCL3/PPP1R15A/CYP1B1	5
MF	GO:1901681	sulfur compound binding	7/212	275/18496	0.0395849	0.205526	THBS1/CXCL8/ADAMTS1/CCL8/HBEGF/CRISPLD2/FST	7
BP	GO:0000305	response to oxygen radical	2/208	29/18870	0.0403991	0.0988777	MIR21/GCH1	2
BP	GO:0003401	axis elongation	2/208	29/18870	0.0403991	0.0988777	AREG/RDH10	2
BP	GO:0010165	response to X-ray	2/208	29/18870	0.0403991	0.0988777	CDKN1A/THBD	2
BP	GO:0032770	positive regulation of monooxygenase activity	2/208	29/18870	0.0403991	0.0988777	GCH1/IL1B	2
BP	GO:0035872	nucleotide-binding domain, leucine rich repeat containing receptor signaling pathway	2/208	29/18870	0.0403991	0.0988777	TNFAIP3/BIRC3	2
BP	GO:0051354	negative regulation of oxidoreductase activity	2/208	29/18870	0.0403991	0.0988777	MIR21/GLA	2
BP	GO:0060603	mammary gland duct morphogenesis	2/208	29/18870	0.0403991	0.0988777	AREG/EPHA2	2
BP	GO:0072207	metanephric epithelium development	2/208	29/18870	0.0403991	0.0988777	LIF/HES1	2
BP	GO:0090025	regulation of monocyte chemotaxis	2/208	29/18870	0.0403991	0.0988777	SERPINE1/DUSP1	2
BP	GO:0097421	liver regeneration	2/208	29/18870	0.0403991	0.0988777	IL6/SLC7A5	2
BP	GO:1900368	regulation of post-transcriptional gene silencing by regulatory ncRNA	2/208	29/18870	0.0403991	0.0988777	IL6/ZFP36	2
BP	GO:1901186	positive regulation of ERBB signaling pathway	2/208	29/18870	0.0403991	0.0988777	PLAUR/DGKD	2
BP	GO:0051347	positive regulation of transferase activity	9/208	414/18870	0.0405209	0.0989968	EGR1/MIR21/CDKN1A/THBS1/MYC/KLF4/ARRDC4/EPHA2/IL1B	9
BP	GO:1904659	glucose transmembrane transport	4/208	117/18870	0.0406186	0.0989968	NR4A3/SLC2A14/SLC2A3/IL1B	4
BP	GO:2000278	regulation of DNA biosynthetic process	4/208	117/18870	0.0406186	0.0989968	CDKN1A/MYC/KLF4/CYP1B1	4
MF	GO:0015145	monosaccharide transmembrane transporter activity	2/212	28/18496	0.0406604	0.205555	SLC2A14/SLC2A3	2
MF	GO:0141052	histone H3 demethylase activity	2/212	28/18496	0.0406604	0.205555	KDM7A/KDM6B	2
BP	GO:0032835	glomerulus development	3/208	69/18870	0.0406861	0.0989968	EGR1/GPR4/HES1	3
BP	GO:2000401	regulation of lymphocyte migration	3/208	69/18870	0.0406861	0.0989968	CCL2/FADD/CCL3	3
BP	GO:2000573	positive regulation of DNA biosynthetic process	3/208	69/18870	0.0406861	0.0989968	MYC/KLF4/CYP1B1	3
BP	GO:0051897	positive regulation of phosphatidylinositol 3-kinase/protein kinase B signal transduction	5/208	171/18870	0.0411684	0.100073	MIR21/THBS1/HBEGF/CCL3/CSF3	5
BP	GO:0051928	positive regulation of calcium ion transport	4/208	118/18870	0.0416951	0.101254	CCL2/VMP1/STC1/CCL3	4
BP	GO:0001558	regulation of cell growth	9/208	417/18870	0.0420924	0.10192	CDKN1A/HBEGF/SPHK1/RGS2/DCUN1D3/SGK1/SOX17/SOCS2/INHBA	9
BP	GO:0051962	positive regulation of nervous system development	7/208	290/18870	0.0421739	0.10192	IL6/EGR2/SLC7A5/LIF/HES1/IL1B/TNFRSF1B	7
BP	GO:0032922	circadian regulation of gene expression	3/208	70/18870	0.0421739	0.10192	EGR1/NAMPT/BHLHE40	3
BP	GO:0048662	negative regulation of smooth muscle cell proliferation	3/208	70/18870	0.0421739	0.10192	CDKN1A/TNFAIP3/HMOX1	3
BP	GO:1902750	negative regulation of cell cycle G2/M phase transition	3/208	70/18870	0.0421739	0.10192	CDKN1A/IER3/NABP1	3
BP	GO:1990748	cellular detoxification	4/208	119/18870	0.0427876	0.103161	MIR21/PIM1/PTGS2/GCH1	4
BP	GO:0030100	regulation of endocytosis	7/208	291/18870	0.0428274	0.103161	CCL2/SELE/PTX3/SPHK1/SERPINE1/IL1B/DGKD	7
BP	GO:0006359	regulation of transcription by RNA polymerase III	2/208	30/18870	0.0429773	0.103161	DDX21/INHBA	2
BP	GO:0009649	entrainment of circadian clock	2/208	30/18870	0.0429773	0.103161	SIK1/BHLHE40	2
BP	GO:0060147	regulation of post-transcriptional gene silencing	2/208	30/18870	0.0429773	0.103161	IL6/ZFP36	2
BP	GO:0070723	response to cholesterol	2/208	30/18870	0.0429773	0.103161	INHBA/CCL3	2
BP	GO:1900101	regulation of endoplasmic reticulum unfolded protein response	2/208	30/18870	0.0429773	0.103161	PPP1R15B/PPP1R15A	2
CC	GO:0005640	nuclear outer membrane	2/213	31/19886	0.0433279	0.35424	PTGS2/ITPRIP	2
MF	GO:0001965	G-protein alpha-subunit binding	2/212	29/18496	0.0433497	0.210828	RGS2/RGS1	2
MF	GO:0001968	fibronectin binding	2/212	29/18496	0.0433497	0.210828	THBS1/TNFAIP6	2
MF	GO:0033612	receptor serine/threonine kinase binding	2/212	29/18496	0.0433497	0.210828	FADD/INHBA	2
CC	GO:0070821	tertiary granule membrane	3/213	73/19886	0.0436246	0.35424	SLC2A3/PLAU/CD93	3
BP	GO:0060420	regulation of heart growth	3/208	71/18870	0.0436887	0.104768	PIM1/RGS2/DUSP6	3
BP	GO:0008645	hexose transmembrane transport	4/208	120/18870	0.0438962	0.105063	NR4A3/SLC2A14/SLC2A3/IL1B	4
BP	GO:0071346	cellular response to type II interferon	4/208	120/18870	0.0438962	0.105063	CCL2/IRF1/CCL8/CCL3	4
BP	GO:0043523	regulation of neuron apoptotic process	6/208	232/18870	0.0439461	0.105082	EGR1/NR4A2/CCL2/MCL1/BTG2/CCL3	6
CC	GO:1904813	ficolin-1-rich granule lumen	4/213	124/19886	0.044489	0.35424	PNP/TNFAIP6/CRISPLD2/HSPA6	4
BP	GO:0072331	signal transduction by p53 class mediator	5/208	175/18870	0.0447099	0.106806	MIR21/CDKN1A/MYC/BCL3/SGK1	5
BP	GO:0030278	regulation of ossification	4/208	121/18870	0.0450208	0.107343	EGR2/CHSY1/SGMS2/CCL3	4
BP	GO:0071887	leukocyte apoptotic process	4/208	121/18870	0.0450208	0.107343	IL6/BCL3/FADD/NFKBIZ	4
CC	GO:0030669	clathrin-coated endocytic vesicle membrane	3/213	74/19886	0.0451211	0.35424	HBEGF/AREG/LDLR	3
BP	GO:0030858	positive regulation of epithelial cell differentiation	3/208	72/18870	0.0452304	0.107627	MIR21/LIF/SERPINE1	3
BP	GO:0050766	positive regulation of phagocytosis	3/208	72/18870	0.0452304	0.107627	CCL2/PTX3/IL1B	3
BP	GO:0003338	metanephros morphogenesis	2/208	31/18870	0.0456153	0.107627	LIF/HES1	2
BP	GO:0031646	positive regulation of nervous system process	2/208	31/18870	0.0456153	0.107627	EGR2/TNFRSF1B	2
BP	GO:0034121	regulation of toll-like receptor signaling pathway	2/208	31/18870	0.0456153	0.107627	IRF1/BIRC3	2
BP	GO:0034311	diol metabolic process	2/208	31/18870	0.0456153	0.107627	SPHK1/GCH1	2
BP	GO:0060966	regulation of gene silencing by regulatory ncRNA	2/208	31/18870	0.0456153	0.107627	IL6/ZFP36	2
BP	GO:0070536	protein K63-linked deubiquitination	2/208	31/18870	0.0456153	0.107627	TNFAIP3/OTUD1	2
BP	GO:0090322	regulation of superoxide metabolic process	2/208	31/18870	0.0456153	0.107627	MIR21/GCH1	2
BP	GO:1900017	positive regulation of cytokine production involved in inflammatory response	2/208	31/18870	0.0456153	0.107627	IL6/MIR21	2
BP	GO:2000191	regulation of fatty acid transport	2/208	31/18870	0.0456153	0.107627	THBS1/IL1B	2
MF	GO:0032452	histone demethylase activity	2/212	30/18496	0.0461034	0.216017	KDM7A/KDM6B	2
MF	GO:0051119	sugar transmembrane transporter activity	2/212	30/18496	0.0461034	0.216017	SLC2A14/SLC2A3	2
MF	GO:0140457	protein demethylase activity	2/212	30/18496	0.0461034	0.216017	KDM7A/KDM6B	2
BP	GO:0022612	gland morphogenesis	4/208	122/18870	0.0461615	0.108813	IL6/TNFAIP3/AREG/EPHA2	4
BP	GO:0006879	intracellular iron ion homeostasis	3/208	73/18870	0.0467989	0.109899	MYC/HMOX1/STEAP4	3
BP	GO:0009247	glycolipid biosynthetic process	3/208	73/18870	0.0467989	0.109899	UGCG/B3GNT5/PIGA	3
BP	GO:0032732	positive regulation of interleukin-1 production	3/208	73/18870	0.0467989	0.109899	IL6/EGR1/CCL3	3
BP	GO:0071677	positive regulation of mononuclear cell migration	3/208	73/18870	0.0467989	0.109899	SERPINE1/FADD/CCL3	3
BP	GO:0015749	monosaccharide transmembrane transport	4/208	123/18870	0.0473183	0.110806	NR4A3/SLC2A14/SLC2A3/IL1B	4
BP	GO:0032479	regulation of type I interferon production	4/208	123/18870	0.0473183	0.110806	MIR21/IRF1/ARRDC4/REL	4
BP	GO:0032606	type I interferon production	4/208	123/18870	0.0473183	0.110806	MIR21/IRF1/ARRDC4/REL	4
BP	GO:0001516	prostaglandin biosynthetic process	2/208	32/18870	0.0483114	0.111933	PTGS2/IL1B	2
BP	GO:0002360	T cell lineage commitment	2/208	32/18870	0.0483114	0.111933	IL6/SOCS3	2
BP	GO:0006308	DNA catabolic process	2/208	32/18870	0.0483114	0.111933	IL6/ISG20	2
BP	GO:0030149	sphingolipid catabolic process	2/208	32/18870	0.0483114	0.111933	SPHK1/GLA	2
BP	GO:0034391	regulation of smooth muscle cell apoptotic process	2/208	32/18870	0.0483114	0.111933	MIR21/SLC7A5	2
BP	GO:0045907	positive regulation of vasoconstriction	2/208	32/18870	0.0483114	0.111933	MIR21/PTGS2	2
BP	GO:0046457	prostanoid biosynthetic process	2/208	32/18870	0.0483114	0.111933	PTGS2/IL1B	2
BP	GO:0051085	chaperone cofactor-dependent protein refolding	2/208	32/18870	0.0483114	0.111933	HSPA6/DNAJB1	2
BP	GO:1901185	negative regulation of ERBB signaling pathway	2/208	32/18870	0.0483114	0.111933	GPRC5A/ERRFI1	2
BP	GO:1901889	negative regulation of cell junction assembly	2/208	32/18870	0.0483114	0.111933	THBS1/IL1B	2
BP	GO:0045669	positive regulation of osteoblast differentiation	3/208	74/18870	0.0483939	0.111933	IL6/MIR21/CEBPD	3
BP	GO:0009267	cellular response to starvation	5/208	179/18870	0.0484285	0.111933	CDKN1A/SLC7A5/FOS/ATF3/KLF10	5
BP	GO:0071772	response to BMP	5/208	179/18870	0.0484285	0.111933	EGR1/MIR21/TNFAIP6/HES1/FST	5
BP	GO:0071773	cellular response to BMP stimulus	5/208	179/18870	0.0484285	0.111933	EGR1/MIR21/TNFAIP6/HES1/FST	5
MF	GO:0048019	receptor antagonist activity	2/212	31/18496	0.0489196	0.221123	IL1RN/FST	2
MF	GO:0071813	lipoprotein particle binding	2/212	31/18496	0.0489196	0.221123	THBS1/LDLR	2
MF	GO:0071814	protein-lipid complex binding	2/212	31/18496	0.0489196	0.221123	THBS1/LDLR	2
BP	GO:0043547	positive regulation of GTPase activity	6/208	239/18870	0.0494816	0.114261	CCL2/CCL8/RGS16/RGS1/EPHA2/CCL3	6
CC	GO:0031968	organelle outer membrane	6/213	246/19886	0.0495716	0.37092	MCL1/PTGS2/PPP1R15A/HMOX1/MGARP/ITPRIP	6

## Sheet: GSE4386_P_kegg_result
category	subcategory	ID	Description	GeneRatio	BgRatio	pvalue	qvalue	geneID	Count
Environmental Information Processing	Signal transduction	hsa04668	TNF signaling pathway	22/121	119/8844	2.39332e-19	3.72854e-17	3569/2920/9021/6347/6401/3726/3383/7128/3659/3976/2353/602/5743/2921/2919/9586/3725/8772/330/197259/3553/7133	22
Organismal Systems	Immune system	hsa04657	IL-17 signaling pathway	15/121	95/8844	2.00896e-12	1.56487e-10	2354/3569/2920/6347/3576/7128/2353/5743/2921/8061/2919/3725/8772/3553/1440	15
Environmental Information Processing	Signal transduction	hsa04064	NF-kappa B signaling pathway	13/121	105/8844	1.48311e-09	7.70178e-08	2920/3576/3383/7128/5743/2921/4616/2919/1647/5328/330/10912/3553	13
Human Diseases	Immune disease	hsa05323	Rheumatoid arthritis	11/121	94/8844	5.26932e-08	2.05226e-06	3569/2920/6347/3576/3383/2353/2921/2919/3725/6348/3553	11
Environmental Information Processing	Signaling molecules and interaction	hsa04060	Cytokine-cytokine receptor interaction	18/121	298/8844	1.03875e-07	2.90606e-06	3569/2920/6347/3557/3576/3976/6355/2921/2919/8793/9173/51330/3624/6348/3566/3553/7133/1440	18
Human Diseases	Endocrine and metabolic disease	hsa04933	AGE-RAGE signaling pathway in diabetic complications	11/121	101/8844	1.11923e-07	2.90606e-06	3569/1958/6347/6401/3576/3383/5292/7056/3725/5054/3553	11
Human Diseases	Infectious disease: parasitic	hsa05144	Malaria	8/121	50/8844	3.23122e-07	7.19128e-06	3569/6347/6401/7057/3576/3383/3553/1440	8
Environmental Information Processing	Signaling molecules and interaction	hsa04061	Viral protein interaction with cytokine and cytokine receptor	10/121	100/8844	9.70261e-07	1.88946e-05	3569/2920/6347/3576/6355/2921/2919/8793/6348/7133	10
Human Diseases	Cardiovascular disease	hsa05417	Lipid and atherosclerosis	14/121	216/8844	1.32768e-06	2.2982e-05	3569/2920/6347/6401/3576/3383/2353/2921/2919/3725/3949/3310/6348/3553	14
Human Diseases	Cancer: overview	hsa05202	Transcriptional misregulation in cancer	13/121	193/8844	2.11799e-06	3.2996e-05	3569/8013/1026/3576/4609/4616/1647/5328/5966/330/1848/64332/10912	13
Human Diseases	Infectious disease: viral	hsa05167	Kaposi sarcoma-associated herpesvirus infection	13/121	196/8844	2.51671e-06	3.56434e-05	3569/2920/1026/7538/3576/4609/3383/2353/5743/2921/2919/3725/8772	13
Organismal Systems	Immune system	hsa04621	NOD-like receptor signaling pathway	12/121	189/8844	9.80592e-06	0.000118228	3569/2920/6347/10135/3576/7128/2921/2919/3725/8772/330/3553	12
Human Diseases	Infectious disease: bacterial	hsa05134	Legionellosis	7/121	56/8844	1.00346e-05	0.000118228	3569/2920/3576/2921/2919/3310/3553	7
Human Diseases	Infectious disease: parasitic	hsa05142	Chagas disease	9/121	103/8844	1.06245e-05	0.000118228	3569/6347/3576/2353/3725/5054/8772/6348/3553	9
Environmental Information Processing	Signal transduction	hsa04010	MAPK signaling pathway	15/121	300/8844	1.34278e-05	0.000139461	1847/4609/2353/4616/3164/1647/374/3725/1844/1843/3310/1969/1848/10912/3553	15
Human Diseases	Cancer: specific types	hsa05210	Colorectal cancer	8/121	87/8844	2.30686e-05	0.000224615	1026/4609/2353/4616/1647/374/3725/10912	8
Human Diseases	Cancer: specific types	hsa05222	Small cell lung cancer	8/121	93/8844	3.75516e-05	0.000344126	1026/4609/5743/4616/1647/330/1164/10912	8
Human Diseases	Infectious disease: viral	hsa05166	Human T-cell leukemia virus 1 infection	12/121	223/8844	5.10133e-05	0.000441518	3569/1958/1026/7538/1959/4609/3383/2353/8061/2114/9586/3725	12
Human Diseases	Infectious disease: viral	hsa05161	Hepatitis B	10/121	163/8844	7.48648e-05	0.00061385	3569/1960/1026/3576/1959/4609/2353/9586/3725/8772	10
Organismal Systems	Immune system	hsa04625	C-type lectin receptor signaling pathway	8/121	105/8844	8.96926e-05	0.000698658	3569/1960/1959/3659/602/5743/3725/3553	8
Environmental Information Processing	Signal transduction	hsa04630	JAK-STAT signaling pathway	10/121	168/8844	9.64482e-05	0.000707836	3569/9021/1026/4170/4609/5292/3976/8835/3566/1440	10
Human Diseases	Infectious disease: viral	hsa05169	Epstein-Barr virus infection	11/121	203/8844	9.99579e-05	0.000707836	3569/1026/4609/3383/7128/4616/1647/3725/3280/8772/10912	11
Human Diseases	Cardiovascular disease	hsa05418	Fluid shear stress and atherosclerosis	9/121	141/8844	0.000128222	0.000868508	6347/6401/3383/2353/7056/3725/3162/1843/3553	9
Human Diseases	Cancer: specific types	hsa05216	Thyroid cancer	5/121	37/8844	0.000135497	0.000879543	1026/4609/4616/1647/10912	5
Human Diseases	Cancer: specific types	hsa05219	Bladder cancer	5/121	41/8844	0.000223001	0.00138965	1026/7057/3576/4609/1839	5
Human Diseases	Infectious disease: bacterial	hsa05120	Epithelial cell signaling in Helicobacter pylori infection	6/121	71/8844	0.000401598	0.00240634	2920/3576/2921/1839/2919/3725	6
Cellular Processes	Cell growth and death	hsa04210	Apoptosis	8/121	136/8844	0.000532443	0.00300513	4170/2353/4616/1647/3725/8772/330/10912	8
Cellular Processes	Cell growth and death	hsa04115	p53 signaling pathway	6/121	75/8844	0.000540111	0.00300513	1026/7057/4616/1647/5054/10912	6
Human Diseases	Infectious disease: viral	hsa05164	Influenza A	9/121	172/8844	0.000564663	0.0030334	3569/9021/6347/3576/3383/8772/29107/3337/3553	9
Human Diseases	Infectious disease: bacterial	hsa05133	Pertussis	6/121	78/8844	0.000666412	0.00345439	3569/3576/3659/2353/3725/3553	6
Organismal Systems	Development and regeneration	hsa04380	Osteoclast differentiation	8/121	142/8844	0.000709011	0.00345439	2354/9021/3726/2353/8061/2355/3725/3553	8
Organismal Systems	Immune system	hsa04620	Toll-like receptor signaling pathway	7/121	109/8844	0.000709551	0.00345439	3569/3576/2353/3725/8772/6348/3553	7
Human Diseases	Cancer: specific types	hsa05224	Breast cancer	8/121	148/8844	0.000930074	0.00439078	1026/4609/2353/4616/1647/3725/3280/10912	8
Organismal Systems	Endocrine system	hsa04928	Parathyroid hormone synthesis, secretion and action	7/121	115/8844	0.000975375	0.00446921	1958/4929/1026/2353/1839/9586/6446	7
Human Diseases	Infectious disease: viral	hsa05163	Human cytomegalovirus infection	10/121	226/8844	0.00103395	0.00460225	3569/6347/1026/3576/4609/5743/9586/8772/6348/3553	10
Human Diseases	Cancer: specific types	hsa05213	Endometrial cancer	5/121	59/8844	0.00122481	0.00530037	1026/4609/4616/1647/10912	5
Cellular Processes	Cell growth and death	hsa04218	Cellular senescence	8/121	157/8844	0.00136221	0.00573564	3569/1026/3576/4609/4616/1647/5054/10912	8
Human Diseases	Infectious disease: parasitic	hsa05143	African trypanosomiasis	4/121	37/8844	0.00155336	0.00636836	3569/6401/3383/3553	4
Human Diseases	Infectious disease: parasitic	hsa05146	Amoebiasis	6/121	103/8844	0.00281351	0.0112389	3569/2920/3576/2921/2919/3553	6
Human Diseases	Infectious disease: viral	hsa05162	Measles	7/121	139/8844	0.00290272	0.0113053	3569/7128/2353/3725/8772/3310/3553	7
Human Diseases	Endocrine and metabolic disease	hsa04936	Alcoholic liver disease	7/121	144/8844	0.0035344	0.0132147	3569/2920/3576/2921/2919/8772/3553	7
Human Diseases	Cancer: overview	hsa05206	MicroRNAs in cancer	11/121	312/8844	0.00356262	0.0132147	406991/1026/7057/4170/4609/5292/5743/5328/3162/1545/406947	11
Environmental Information Processing	Signal transduction	hsa04151	PI3K-Akt signaling pathway	12/121	362/8844	0.00387862	0.0140523	3569/1026/7057/4170/4609/3164/374/9586/6446/1969/3566/1440	12
Human Diseases	Cancer: specific types	hsa05220	Chronic myeloid leukemia	5/121	77/8844	0.00397788	0.0140844	1026/4609/4616/1647/10912	5
Cellular Processes	Transport and catabolism	hsa04148	Efferocytosis	7/121	156/8844	0.00547627	0.0189588	9023/7057/1847/5743/8877/1844/6446	7
Metabolism	Lipid metabolism	hsa00600	Sphingolipid metabolism	4/121	54/8844	0.0062244	0.0210803	7357/8877/2717/166929	4
Environmental Information Processing	Signal transduction	hsa04012	ErbB signaling pathway	5/121	86/8844	0.00636309	0.0210915	1026/4609/1839/374/3725	5
Human Diseases	Infectious disease: bacterial	hsa05132	Salmonella infection	9/121	251/8844	0.00738459	0.0239675	3569/3576/4609/2353/3725/8772/330/197259/3553	9
Environmental Information Processing	Signal transduction	hsa04068	FoxO signaling pathway	6/121	133/8844	0.00969984	0.0308395	3569/1026/4616/1647/6446/10912	6
Human Diseases	Cancer: specific types	hsa05217	Basal cell carcinoma	4/121	63/8844	0.0106741	0.0332582	1026/4616/1647/10912	4
Human Diseases	Infectious disease: bacterial	hsa05135	Yersinia infection	6/121	138/8844	0.011507	0.0351504	3569/6347/3576/2353/3725/3553	6
Human Diseases	Immune disease	hsa05321	Inflammatory bowel disease	4/121	65/8844	0.0118826	0.0355998	3569/3725/3566/3553	4
Human Diseases	Substance dependence	hsa05031	Amphetamine addiction	4/121	69/8844	0.0145555	0.0427847	2354/2353/9586/3725	4
Organismal Systems	Endocrine system	hsa04917	Prolactin signaling pathway	4/121	71/8844	0.0160235	0.0440348	9021/3659/2353/8835	4
Environmental Information Processing	Signal transduction	hsa04350	TGF-beta signaling pathway	5/121	108/8844	0.0160828	0.0440348	7057/4609/2615/3624/10468	5
Organismal Systems	Immune system	hsa04659	Th17 cell differentiation	5/121	108/8844	0.0160828	0.0440348	3569/2353/3725/3566/3553	5
[truncated: 22 more rows]

## Sheet: GSE4386_P_GSEA_KEGG_result
ID	Description	setSize	enrichmentScore	NES	pvalue	p.adjust	qvalue	rank	leading_edge	core_enrichment
[truncated: 91 more rows]

## Sheet: DE-MTRGs_go_result
ONTOLOGY	ID	Description	GeneRatio	BgRatio	pvalue	qvalue	geneID	Count
[truncated: 294 more rows]

[truncated: 1 more sheets: DE-MTRGs_kegg_result]
