# Supplementary material for: Identification of mitochondria-related genes associated with anesthetics in patients undergoing off-pump coronary artery bypass grafting surgery
Source: Front Surg. 2025 Jul 9;12:1515732. doi: 10.3389/fsurg.2025.1515732 (PMC12283725; doi:10.3389/fsurg.2025.1515732)
Supplement: Supplementary Table S4 — Four hub genes and their upstream miRNAs. [file Table4.xlsx]

## Sheet: ALL
miRNAid	miRNAname	geneID	geneName	geneType	chromosome	narrowStart	narrowEnd	broadStart	broadEnd	strand	clipExpNum	degraExpNum	RBP	PITA	RNA22	miRmap	microT	miRanda	PicTar	TargetScan	TDMDScore	phyloP	pancancerNum
MIMAT0019868	hsa-miR-4739	ENSG00000185022	MAFF	protein_coding	chr22	38214922	38214927	38214922	38214927	+	2	0	AGO1	0	0	1	0	0	0	0	1.7972	-0.092	1
MIMAT0004926	hsa-miR-708-5p	ENSG00000185022	MAFF	protein_coding	chr22	38215969	38215975	38215969	38215975	+	0	0	NA	1	0	0	0	0	0	0	1.7807	0.122	7
MIMAT0018192	hsa-miR-3918	ENSG00000185022	MAFF	protein_coding	chr22	38215483	38215488	38215483	38215488	+	0	0	NA	0	0	1	0	0	0	0	1.6387	0.103	0
MIMAT0003885	hsa-miR-454-3p	ENSG00000185022	MAFF	protein_coding	chr22	38215307	38215314	38215287	38215315	+	3	0	AGO1-4,AGO2	1	0	0	1	1	0	0	1.5375	0.07	14
MIMAT0004679	hsa-miR-296-3p	ENSG00000185022	MAFF	protein_coding	chr22	38215880	38215900	38215880	38215900	+	1	1	AGO2	0	1	0	0	0	0	0	1.3984	-0.275	7
MIMAT0015023	hsa-miR-3150a-3p	ENSG00000185022	MAFF	protein_coding	chr22	38214926	38214932	38214905	38214933	+	2	0	AGO1	0	1	1	1	0	0	0	1.388	0.138	2
MIMAT0021125	hsa-miR-5194	ENSG00000185022	MAFF	protein_coding	chr22	38215910	38215915	38215888	38215916	+	1	1	AGO2	0	0	1	1	0	0	0	1.3714	-0.442	0
MIMAT0018194	hsa-miR-3150b-3p	ENSG00000185022	MAFF	protein_coding	chr22	38214912	38214932	38214912	38214932	+	2	0	AGO1	0	1	0	0	0	0	0	1.3588	-0.096	1
MIMAT0016844	hsa-miR-4295	ENSG00000185022	MAFF	protein_coding	chr22	38215287	38215315	38215287	38215315	+	3	0	AGO1-4,AGO2	0	0	0	1	0	0	0	1.3468	0.103	0
MIMAT0000084	hsa-miR-27a-3p	ENSG00000185022	MAFF	protein_coding	chr22	38215277	38215282	38215277	38215282	+	1	0	AGO2	1	0	0	0	0	0	0	1.3437	-0.676	1
MIMAT0000419	hsa-miR-27b-3p	ENSG00000185022	MAFF	protein_coding	chr22	38215277	38215282	38215277	38215282	+	1	0	AGO2	1	0	0	0	0	0	0	1.3437	-0.676	4
MIMAT0000438	hsa-miR-152-3p	ENSG00000185022	MAFF	protein_coding	chr22	38214978	38214983	38214956	38214984	+	2	0	AGO1	1	0	0	1	0	0	0	1.3391	-0.275	6
MIMAT0005794	hsa-miR-1296-5p	ENSG00000185022	MAFF	protein_coding	chr22	38215778	38215785	38215778	38215785	+	1	0	AGO1	1	0	0	0	0	0	0	1.3153	-0.395	6
MIMAT0000422	hsa-miR-124-3p	ENSG00000185022	MAFF	protein_coding	chr22	38215845	38215850	38215845	38215850	+	1	0	AGO2	1	0	0	0	0	0	0	1.256	0.207	5
MIMAT0007890	hsa-miR-1914-3p	ENSG00000185022	MAFF	protein_coding	chr22	38215888	38215890	38215862	38215916	+	1	2	AGO2	0	0	0	2	0	0	0	1.2508	-0.507	1
MIMAT0000688	hsa-miR-301a-3p	ENSG00000185022	MAFF	protein_coding	chr22	38216337	38216342	38216315	38216343	+	0	0	NA	1	0	0	1	0	0	0	1.2407	0.023	15
MIMAT0004958	hsa-miR-301b-3p	ENSG00000185022	MAFF	protein_coding	chr22	38216337	38216342	38216315	38216343	+	0	0	NA	1	0	0	1	0	0	0	1.2407	0.023	4
MIMAT0000271	hsa-miR-214-3p	ENSG00000185022	MAFF	protein_coding	chr22	38215478	38215483	38215478	38215483	+	0	0	NA	1	0	0	0	0	0	0	1.235	0.402	2
MIMAT0002807	hsa-miR-491-5p	ENSG00000185022	MAFF	protein_coding	chr22	38215325	38215330	38215325	38215330	+	2	0	AGO1-4,AGO2	1	0	1	0	0	0	0	1.2328	-0.118	4
MIMAT0018192	hsa-miR-3918	ENSG00000185022	MAFF	protein_coding	chr22	38215014	38215020	38215014	38215020	+	1	0	AGO1-4	0	0	1	0	0	0	0	1.2323	0.211	0
MIMAT0004679	hsa-miR-296-3p	ENSG00000185022	MAFF	protein_coding	chr22	38215650	38215656	38215650	38215656	+	1	0	AGO1-4	1	0	0	0	0	0	0	1.2217	0.044	7
MIMAT0000759	hsa-miR-148b-3p	ENSG00000185022	MAFF	protein_coding	chr22	38214978	38214983	38214956	38214984	+	2	0	AGO1	1	0	0	1	0	0	0	1.2139	-0.275	14
MIMAT0014989	hsa-miR-3126-5p	ENSG00000185022	MAFF	protein_coding	chr22	38214907	38214929	38214907	38214929	+	2	0	AGO1	0	1	0	0	0	0	0	1.2061	0.13	2
MIMAT0018937	hsa-miR-378g	ENSG00000185022	MAFF	protein_coding	chr22	38215871	38215877	38215850	38215878	+	1	1	AGO2	0	0	1	1	0	0	0	1.1939	0.669	0
MIMAT0019868	hsa-miR-4739	ENSG00000185022	MAFF	protein_coding	chr22	38215977	38215982	38215977	38215982	+	0	0	NA	0	0	1	0	0	0	0	1.1914	0.842	1
MIMAT0004748	hsa-miR-423-5p	ENSG00000185022	MAFF	protein_coding	chr22	38215909	38215915	38215888	38215916	+	1	1	AGO2	1	1	1	1	0	0	0	1.1665	-0.38	4
MIMAT0004748	hsa-miR-423-5p	ENSG00000185022	MAFF	protein_coding	chr22	38214906	38214912	38214885	38214913	+	0	0	NA	1	0	1	1	0	0	0	1.1357	0.936	4
MIMAT0000243	hsa-miR-148a-3p	ENSG00000185022	MAFF	protein_coding	chr22	38214978	38214983	38214956	38214984	+	2	0	AGO1	1	0	0	1	0	0	0	1.1308	-0.275	12
MIMAT0000281	hsa-miR-224-5p	ENSG00000185022	MAFF	protein_coding	chr22	38215279	38215285	38215266	38215286	+	1	0	AGO2	1	0	0	0	1	0	0	1.1092	-0.306	4
MIMAT0000073	hsa-miR-19a-3p	ENSG00000185022	MAFF	protein_coding	chr22	38215308	38215313	38215308	38215313	+	2	0	AGO1-4,AGO2	1	0	0	0	0	0	0	1.0922	0.209	5
MIMAT0003321	hsa-miR-651-5p	ENSG00000185022	MAFF	protein_coding	chr22	38215781	38215786	38215781	38215786	+	1	0	AGO1	1	0	0	0	0	0	0	1.0854	-0.636	8
MIMAT0000095	hsa-miR-96-5p	ENSG00000185022	MAFF	protein_coding	chr22	38215225	38215231	38215207	38215232	+	1	0	AGO1-4	1	0	1	0	1	0	0	1.0784	0.157	7
MIMAT0005796	hsa-miR-1271-5p	ENSG00000185022	MAFF	protein_coding	chr22	38215225	38215231	38215211	38215232	+	1	0	AGO1-4	1	0	1	0	1	0	0	1.0776	0.157	5
MIMAT0021125	hsa-miR-5194	ENSG00000185022	MAFF	protein_coding	chr22	38214907	38214912	38214885	38214913	+	0	0	NA	0	0	1	1	0	0	0	1.0776	1.126	0
MIMAT0019864	hsa-miR-3064-5p	ENSG00000185022	MAFF	protein_coding	chr22	38215669	38215675	38215669	38215675	+	1	0	AGO1-4	0	0	1	0	0	0	0	1.0743	0.786	1
MIMAT0015023	hsa-miR-3150a-3p	ENSG00000185022	MAFF	protein_coding	chr22	38215951	38215957	38215930	38215958	+	0	0	NA	0	0	1	1	0	0	0	1.0455	2.322	2
MIMAT0001541	hsa-miR-449a	ENSG00000185022	MAFF	protein_coding	chr22	38215904	38215911	38215887	38215912	+	1	1	AGO2	1	1	0	0	1	0	0	1.0399	0.085	2
MIMAT0003327	hsa-miR-449b-5p	ENSG00000185022	MAFF	protein_coding	chr22	38215904	38215911	38215887	38215912	+	1	1	AGO2	1	1	0	0	1	0	0	1.0399	0.085	3
MIMAT0000688	hsa-miR-301a-3p	ENSG00000185022	MAFF	protein_coding	chr22	38215307	38215314	38215287	38215315	+	3	0	AGO1-4,AGO2	1	0	0	1	1	0	0	1.036	0.07	15
MIMAT0004958	hsa-miR-301b-3p	ENSG00000185022	MAFF	protein_coding	chr22	38215307	38215314	38215287	38215315	+	3	0	AGO1-4,AGO2	1	0	0	1	1	0	0	1.036	0.07	4
MIMAT0000074	hsa-miR-19b-3p	ENSG00000185022	MAFF	protein_coding	chr22	38215308	38215313	38215308	38215313	+	2	0	AGO1-4,AGO2	1	0	0	0	0	0	0	1.0307	0.209	7
MIMAT0000425	hsa-miR-130a-3p	ENSG00000185022	MAFF	protein_coding	chr22	38215307	38215314	38215287	38215315	+	3	0	AGO1-4,AGO2	1	0	0	1	1	0	0	1.0289	0.07	6
MIMAT0018937	hsa-miR-378g	ENSG00000185022	MAFF	protein_coding	chr22	38214956	38214961	38214934	38214962	+	2	0	AGO1	0	0	1	1	0	0	0	1.028	-0.17	0
MIMAT0016844	hsa-miR-4295	ENSG00000185022	MAFF	protein_coding	chr22	38216315	38216343	38216315	38216343	+	0	0	NA	0	0	0	1	0	0	0	1.023	0.099	0
MIMAT0019776	hsa-miR-1343-3p	ENSG00000185022	MAFF	protein_coding	chr22	38216163	38216168	38216163	38216168	+	0	0	NA	0	0	1	0	0	0	0	1.011	-0.007	5
MIMAT0017999	hsa-miR-3619-5p	ENSG00000185022	MAFF	protein_coding	chr22	38215296	38215302	38215296	38215302	+	3	0	AGO1-4,AGO2	0	0	1	0	0	0	0	0.9778	0.347	1
MIMAT0002855	hsa-miR-520d-5p	ENSG00000185022	MAFF	protein_coding	chr22	38216459	38216464	38216437	38216465	+	1	0	AGO1	1	0	0	1	0	0	0	0.9732	4.199	2
MIMAT0000085	hsa-miR-28-5p	ENSG00000185022	MAFF	protein_coding	chr22	38216402	38216407	38216386	38216408	+	1	0	AGO1	1	0	0	0	1	0	0	0.9656	0.95	6
MIMAT0018937	hsa-miR-378g	ENSG00000185022	MAFF	protein_coding	chr22	38216295	38216301	38216274	38216302	+	0	0	NA	0	0	1	1	0	0	0	0.9573	0.276	0
MIMAT0019909	hsa-miR-4761-3p	ENSG00000185022	MAFF	protein_coding	chr22	38215233	38215239	38215233	38215239	+	1	0	AGO1-4	0	0	1	0	0	0	0	0.9396	0.179	1
MIMAT0003885	hsa-miR-454-3p	ENSG00000185022	MAFF	protein_coding	chr22	38216337	38216342	38216315	38216343	+	0	0	NA	1	0	0	1	0	0	0	0.9332	0.023	14
MIMAT0000271	hsa-miR-214-3p	ENSG00000185022	MAFF	protein_coding	chr22	38215296	38215302	38215283	38215303	+	3	0	AGO1-4,AGO2	1	0	0	0	1	0	0	0.9279	0.347	2
MIMAT0000759	hsa-miR-148b-3p	ENSG00000185022	MAFF	protein_coding	chr22	38215309	38215315	38215288	38215316	+	3	0	AGO1-4,AGO2	1	0	0	1	1	0	0	0.9079	0.22	14
MIMAT0000691	hsa-miR-130b-3p	ENSG00000185022	MAFF	protein_coding	chr22	38216337	38216342	38216315	38216343	+	0	0	NA	1	0	0	1	0	0	0	0.9057	0.023	6
MIMAT0000252	hsa-miR-7-5p	ENSG00000185022	MAFF	protein_coding	chr22	38215020	38215026	38215006	38215027	+	2	0	AGO1,AGO1-4	1	0	0	0	1	0	0	0.9056	0.075	11
MIMAT0002877	hsa-miR-513a-5p	ENSG00000185022	MAFF	protein_coding	chr22	38215277	38215282	38215277	38215282	+	1	0	AGO2	1	0	0	0	0	0	0	0.8942	-0.676	5
MIMAT0000691	hsa-miR-130b-3p	ENSG00000185022	MAFF	protein_coding	chr22	38215307	38215314	38215287	38215315	+	3	0	AGO1-4,AGO2	1	0	0	1	1	0	0	0.8925	0.07	6
MIMAT0025464	hsa-miR-6504-5p	ENSG00000185022	MAFF	protein_coding	chr22	38215957	38215962	38215956	38215963	+	0	0	NA	0	0	1	0	0	1	1	0.892	1.881	0
MIMAT0000085	hsa-miR-28-5p	ENSG00000185022	MAFF	protein_coding	chr22	38215968	38215975	38215968	38215975	+	0	0	NA	1	0	0	0	0	0	0	0.8847	0.06	6
MIMAT0011778	hsa-miR-2278	ENSG00000185022	MAFF	protein_coding	chr22	38215193	38215221	38215193	38215221	+	1	0	AGO1-4	0	0	0	1	0	0	0	0.8492	-0.11	0
MIMAT0007890	hsa-miR-1914-3p	ENSG00000185022	MAFF	protein_coding	chr22	38214907	38214912	38214885	38214929	+	2	0	AGO1	0	0	1	2	0	0	0	0.8414	1.126	1
MIMAT0025464	hsa-miR-6504-5p	ENSG00000185022	MAFF	protein_coding	chr22	38215669	38215675	38215669	38215675	+	1	0	AGO1-4	0	0	1	0	0	0	0	0.7701	0.786	0
MIMAT0000441	hsa-miR-9-5p	ENSG00000185022	MAFF	protein_coding	chr22	38214930	38214935	38214930	38214935	+	2	0	AGO1	1	0	0	0	0	0	0	0.7494	0.636	5
MIMAT0004926	hsa-miR-708-5p	ENSG00000185022	MAFF	protein_coding	chr22	38216402	38216407	38216402	38216407	+	1	0	AGO1	1	0	0	0	0	0	0	0.7391	0.95	7
MIMAT0002849	hsa-miR-524-5p	ENSG00000185022	MAFF	protein_coding	chr22	38216459	38216464	38216437	38216465	+	1	0	AGO1	1	0	0	1	0	0	0	0.7273	4.199	3
MIMAT0000425	hsa-miR-130a-3p	ENSG00000185022	MAFF	protein_coding	chr22	38216337	38216342	38216315	38216343	+	0	0	NA	1	0	0	1	0	0	0	0.6984	0.023	6
MIMAT0004953	hsa-miR-873-5p	ENSG00000185022	MAFF	protein_coding	chr22	38216421	38216426	38216407	38216427	+	2	0	AGO1	1	0	0	0	1	0	0	0.6946	3.668	7
MIMAT0018088	hsa-miR-3666	ENSG00000185022	MAFF	protein_coding	chr22	38215287	38215315	38215287	38215315	+	3	0	AGO1-4,AGO2	0	0	0	1	0	0	0	0.6794	0.103	0
MIMAT0017999	hsa-miR-3619-5p	ENSG00000185022	MAFF	protein_coding	chr22	38215478	38215483	38215478	38215483	+	0	0	NA	0	0	1	0	0	0	0	0.6696	0.402	1
MIMAT0004679	hsa-miR-296-3p	ENSG00000185022	MAFF	protein_coding	chr22	38215243	38215248	38215243	38215248	+	1	0	AGO1-4	1	0	0	0	0	0	0	0.6674	-0.609	7
MIMAT0021043	hsa-miR-5010-5p	ENSG00000185022	MAFF	protein_coding	chr22	38215872	38215894	38215872	38215894	+	1	0	AGO2	0	1	0	0	0	0	0	0.6495	-0.111	2
MIMAT0019864	hsa-miR-3064-5p	ENSG00000185022	MAFF	protein_coding	chr22	38215957	38215962	38215956	38215963	+	0	0	NA	0	0	1	0	0	1	1	0.64	1.881	1
MIMAT0002878	hsa-miR-506-3p	ENSG00000185022	MAFF	protein_coding	chr22	38215845	38215850	38215845	38215850	+	1	0	AGO2	1	0	0	0	0	0	0	0.619	0.207	4
MIMAT0000450	hsa-miR-149-5p	ENSG00000185022	MAFF	protein_coding	chr22	38215957	38215962	38215957	38215963	+	0	0	NA	1	0	0	0	0	1	0	0.6087	1.881	8
MIMAT0002877	hsa-miR-513a-5p	ENSG00000185022	MAFF	protein_coding	chr22	38201970	38201988	38201970	38201988	+	0	0	NA	0	1	0	0	0	0	0	0.603	3.689	5
MIMAT0003294	hsa-miR-625-5p	ENSG00000185022	MAFF	protein_coding	chr22	38215888	38215893	38215888	38215893	+	1	0	AGO2	1	0	0	0	0	0	0	0.5796	-0.368	4
MIMAT0000259	hsa-miR-182-5p	ENSG00000185022	MAFF	protein_coding	chr22	38215226	38215231	38215226	38215231	+	1	0	AGO1-4	1	0	0	0	0	0	0	0.5623	0.144	11
MIMAT0000262	hsa-miR-187-3p	ENSG00000185022	MAFF	protein_coding	chr22	38215613	38215618	38215613	38215618	+	2	0	AGO1-4	1	0	0	0	0	0	0	0.5576	-0.336	3
MIMAT0018192	hsa-miR-3918	ENSG00000185022	MAFF	protein_coding	chr22	38215999	38216005	38215999	38216005	+	0	0	NA	0	0	1	0	0	0	0	0.5447	1.764	0
MIMAT0007890	hsa-miR-1914-3p	ENSG00000185022	MAFF	protein_coding	chr22	38215197	38215203	38215176	38215204	+	0	0	NA	0	0	1	1	0	0	0	0.5375	-0.363	1
MIMAT0000450	hsa-miR-149-5p	ENSG00000185022	MAFF	protein_coding	chr22	38215670	38215675	38215670	38215675	+	1	0	AGO1-4	1	0	0	0	0	0	0	0.4836	0.947	8
MIMAT0005877	hsa-miR-1286	ENSG00000185022	MAFF	protein_coding	chr22	38215294	38215300	38215294	38215300	+	3	0	AGO1-4,AGO2	1	0	0	0	0	0	0	0.4692	-0.059	1
MIMAT0000438	hsa-miR-152-3p	ENSG00000185022	MAFF	protein_coding	chr22	38215309	38215315	38215288	38215316	+	3	0	AGO1-4,AGO2	1	0	0	1	1	0	0	0.468	0.22	6
MIMAT0000271	hsa-miR-214-3p	ENSG00000185022	MAFF	protein_coding	chr22	38215717	38215722	38215717	38215722	+	0	0	NA	1	0	0	0	0	0	0	0.4679	0.548	2
MIMAT0002807	hsa-miR-491-5p	ENSG00000185022	MAFF	protein_coding	chr22	38215914	38215920	38215900	38215921	+	0	0	NA	1	0	1	0	1	0	0	0.4401	-0.172	4
MIMAT0004920	hsa-miR-541-3p	ENSG00000185022	MAFF	protein_coding	chr22	38215326	38215331	38215326	38215331	+	2	0	AGO1-4,AGO2	1	0	0	0	0	0	0	0.4334	0.207	1
MIMAT0004810	hsa-miR-629-5p	ENSG00000185022	MAFF	protein_coding	chr22	38216197	38216202	38216197	38216202	+	0	0	NA	1	0	0	0	0	0	0	0.417	-0.05	6
MIMAT0000454	hsa-miR-184	ENSG00000185022	MAFF	protein_coding	chr22	38215292	38215297	38215292	38215297	+	3	0	AGO1-4,AGO2	1	0	0	0	0	0	0	0.4024	-0.027	6
MIMAT0000281	hsa-miR-224-5p	ENSG00000185022	MAFF	protein_coding	chr22	38216425	38216430	38216425	38216431	+	1	0	AGO1	1	0	0	0	0	0	1	0.4019	3.067	4
MIMAT0000243	hsa-miR-148a-3p	ENSG00000185022	MAFF	protein_coding	chr22	38215309	38215315	38215288	38215316	+	3	0	AGO1-4,AGO2	1	0	0	1	1	0	0	0.3729	0.22	12
MIMAT0007890	hsa-miR-1914-3p	ENSG00000185022	MAFF	protein_coding	chr22	38215910	38215915	38215910	38215915	+	0	0	NA	0	0	1	0	0	0	0	0.3463	-0.442	1
MIMAT0002868	hsa-miR-522-3p	ENSG00000185022	MAFF	protein_coding	chr22	38214965	38214970	38214965	38214970	+	2	0	AGO1	1	0	0	0	0	0	0	0.3385	-0.134	3
MIMAT0000253	hsa-miR-10a-5p	ENSG00000185022	MAFF	protein_coding	chr22	38215673	38215678	38215673	38215678	+	1	0	AGO1-4	1	0	0	0	0	0	0	0.3235	0.851	3
MIMAT0019868	hsa-miR-4739	ENSG00000185022	MAFF	protein_coding	chr22	38215548	38215554	38215548	38215554	+	0	0	NA	0	0	1	0	0	0	0	0.2976	0.269	1
MIMAT0005794	hsa-miR-1296-5p	ENSG00000185022	MAFF	protein_coding	chr22	38215652	38215657	38215652	38215657	+	1	0	AGO1-4	1	0	0	0	0	0	0	0.2927	0.046	6
MIMAT0004920	hsa-miR-541-3p	ENSG00000185022	MAFF	protein_coding	chr22	38215797	38215802	38215797	38215802	+	1	0	AGO1	1	0	0	0	0	0	0	0.2739	-0.077	1
MIMAT0004810	hsa-miR-629-5p	ENSG00000185022	MAFF	protein_coding	chr22	38215242	38215247	38215242	38215247	+	1	0	AGO1-4	1	0	0	0	0	0	0	0.259	-0.532	6
MIMAT0000424	hsa-miR-128-3p	ENSG00000185022	MAFF	protein_coding	chr22	38215821	38215827	38215821	38215827	+	1	0	AGO1	1	0	0	0	0	0	0	0.2524	-0.188	14
MIMAT0003330	hsa-miR-654-5p	ENSG00000185022	MAFF	protein_coding	chr22	38215797	38215802	38215797	38215802	+	1	0	AGO1	1	0	0	0	0	0	0	0.2161	-0.077	3
MIMAT0015023	hsa-miR-3150a-3p	ENSG00000185022	MAFF	protein_coding	chr22	38215913	38215919	38215892	38215920	+	0	1	NA	0	0	1	1	0	0	0	0.2032	-0.1	2
MIMAT0017999	hsa-miR-3619-5p	ENSG00000185022	MAFF	protein_coding	chr22	38215717	38215722	38215717	38215722	+	0	0	NA	0	0	1	0	0	0	0	0.1578	0.548	1
MIMAT0004810	hsa-miR-629-5p	ENSG00000185022	MAFF	protein_coding	chr22	38215394	38215399	38215394	38215399	+	0	0	NA	1	0	0	0	0	0	0	0.1509	0.346	6
MIMAT0021125	hsa-miR-5194	ENSG00000185022	MAFF	protein_coding	chr22	38215197	38215203	38215176	38215204	+	0	0	NA	0	0	1	1	0	0	0	0.1497	-0.363	0
MIMAT0003393	hsa-miR-425-5p	ENSG00000185022	MAFF	protein_coding	chr22	38215855	38215860	38215855	38215860	+	1	0	AGO2	1	0	0	0	0	0	0	0.1315	0.397	6
MIMAT0000254	hsa-miR-10b-5p	ENSG00000185022	MAFF	protein_coding	chr22	38215673	38215678	38215673	38215678	+	1	0	AGO1-4	1	0	0	0	0	0	0	0.0806	0.851	3
MIMAT0000765	hsa-miR-335-5p	ENSG00000185022	MAFF	protein_coding	chr22	38215026	38215031	38215026	38215031	+	1	0	AGO1-4	1	0	0	0	0	0	0	0.0482	0.042	7
MIMAT0000073	hsa-miR-19a-3p	ENSG00000185022	MAFF	protein_coding	chr22	38215931	38215936	38215931	38215936	+	0	0	NA	1	0	0	0	0	0	0	0.0191	3.936	5
MIMAT0000074	hsa-miR-19b-3p	ENSG00000185022	MAFF	protein_coding	chr22	38215931	38215936	38215931	38215936	+	0	0	NA	1	0	0	0	0	0	0	0.0191	3.936	7
MIMAT0003311	hsa-miR-641	ENSG00000185022	MAFF	protein_coding	chr22	38215019	38215024	38215019	38215024	+	2	0	AGO1,AGO1-4	1	0	0	0	0	0	0	-0.0544	-0.116	1
MIMAT0005877	hsa-miR-1286	ENSG00000185022	MAFF	protein_coding	chr22	38215972	38215977	38215972	38215977	+	0	0	NA	1	0	0	0	0	0	0	-0.0819	0.504	1
MIMAT0019776	hsa-miR-1343-3p	ENSG00000185022	MAFF	protein_coding	chr22	38215249	38215255	38215249	38215255	+	1	0	AGO1-4	0	0	1	0	0	0	0	-0.0987	0.1	5
MIMAT0004748	hsa-miR-423-5p	ENSG00000185022	MAFF	protein_coding	chr22	38215198	38215203	38215176	38215204	+	0	0	NA	1	0	1	1	0	0	0	-0.298	-0.346	4
MIMAT0003330	hsa-miR-654-5p	ENSG00000185022	MAFF	protein_coding	chr22	38215326	38215331	38215326	38215331	+	2	0	AGO1-4,AGO2	1	0	0	0	0	0	0	-0.3969	0.207	3
MIMAT0000690	hsa-miR-296-5p	ENSG00000185022	MAFF	protein_coding	chr22	38215013	38215018	38215013	38215018	+	1	0	AGO1-4	1	0	0	0	0	0	0	-0.7261	0.426	3
MIMAT0000425	hsa-miR-130a-3p	ENSG00000143384	MCL1	protein_coding	chr1	150575752	150575775	150575752	150575775	-	4	1	AGO1-4,AGO2	0	0	0	0	1	0	0	2.2739	0.821	2
MIMAT0000425	hsa-miR-130a-3p	ENSG00000143384	MCL1	protein_coding	chr1	150576589	150576612	150576589	150576612	-	2	0	AGO1,AGO2	0	0	0	0	1	0	0	2.2307	0.833	2
MIMAT0003242	hsa-miR-577	ENSG00000143384	MCL1	protein_coding	chr1	150576434	150576439	150576434	150576439	-	1	0	AGO2	1	0	0	0	0	0	0	1.8517	0.695	15
MIMAT0002813	hsa-miR-493-5p	ENSG00000143384	MCL1	protein_coding	chr1	150576903	150576909	150576903	150576931	-	37	0	AGO1,AGO1-4,AGO2	0	0	0	1	0	1	0	1.7951	0.92	0
MIMAT0004763	hsa-miR-488-3p	ENSG00000143384	MCL1	protein_coding	chr1	150575690	150575696	150575689	150575713	-	4	1	AGO1,AGO1-4,AGO2	1	0	1	0	1	0	0	1.7853	0.144	9
MIMAT0005944	hsa-miR-1252-5p	ENSG00000143384	MCL1	protein_coding	chr1	150576361	150576367	150576361	150576367	-	1	0	AGO1	1	0	0	0	0	0	0	1.7763	0.282	1
MIMAT0025475	hsa-miR-6509-3p	ENSG00000143384	MCL1	protein_coding	chr1	150576319	150576324	150576319	150576324	-	2	0	AGO2	0	0	1	0	0	0	0	1.7551	-0.189	0
MIMAT0005792	hsa-miR-320b	ENSG00000143384	MCL1	protein_coding	chr1	150576873	150576878	150576872	150576900	-	14	0	AGO1,AGO1-4,AGO2	1	0	1	1	0	0	0	1.7542	0.64	5
MIMAT0005793	hsa-miR-320c	ENSG00000143384	MCL1	protein_coding	chr1	150576873	150576878	150576872	150576900	-	14	0	AGO1,AGO1-4,AGO2	1	0	1	1	0	0	0	1.6882	0.64	2
MIMAT0004675	hsa-miR-219a-2-3p	ENSG00000143384	MCL1	protein_coding	chr1	150575810	150575815	150575810	150575815	-	11	0	AGO1,AGO1-4,AGO2	1	0	1	0	0	0	0	1.6854	-0.542	2
MIMAT0006764	hsa-miR-320d	ENSG00000143384	MCL1	protein_coding	chr1	150576873	150576878	150576872	150576900	-	14	0	AGO1,AGO1-4,AGO2	1	0	1	1	0	0	0	1.6718	0.64	5
MIMAT0000510	hsa-miR-320a	ENSG00000143384	MCL1	protein_coding	chr1	150576873	150576878	150576872	150576900	-	14	0	AGO1,AGO1-4,AGO2	1	0	1	1	0	0	0	1.6711	0.64	8
MIMAT0002807	hsa-miR-491-5p	ENSG00000143384	MCL1	protein_coding	chr1	150577195	150577201	150577195	150577201	-	5	0	AGO1-4,AGO2	1	0	0	0	0	0	0	1.6312	0.311	3
MIMAT0003247	hsa-miR-582-5p	ENSG00000143384	MCL1	protein_coding	chr1	150574680	150574687	150574679	150574707	-	19	0	AGO1-4,AGO2	1	0	0	1	0	0	0	1.6312	0.874	10
MIMAT0005798	hsa-miR-1185-5p	ENSG00000143384	MCL1	protein_coding	chr1	150576887	150576915	150576887	150576915	-	29	0	AGO1,AGO1-4,AGO2	0	0	0	1	0	0	0	1.5405	0.648	2
MIMAT0018944	hsa-miR-4429	ENSG00000143384	MCL1	protein_coding	chr1	150576873	150576878	150576872	150576900	-	14	0	AGO1,AGO1-4,AGO2	0	0	1	1	0	0	0	1.5382	0.64	0
MIMAT0000447	hsa-miR-134-5p	ENSG00000143384	MCL1	protein_coding	chr1	150577180	150577185	150577180	150577185	-	1	0	AGO1-4	1	0	0	0	0	0	0	1.5243	0.778	2
MIMAT0000440	hsa-miR-191-5p	ENSG00000143384	MCL1	protein_coding	chr1	150574777	150574783	150574777	150574783	-	14	1	AGO1,AGO1-4,AGO2	1	0	0	0	0	0	0	1.5221	0.771	13
MIMAT0000083	hsa-miR-26b-5p	ENSG00000143384	MCL1	protein_coding	chr1	150576759	150576765	150576758	150576780	-	31	0	AGO1,AGO1-4,AGO2	1	0	0	0	1	1	1	1.5041	1.902	6
MIMAT0022724	hsa-miR-1277-5p	ENSG00000143384	MCL1	protein_coding	chr1	150576672	150576700	150576672	150576700	-	24	0	AGO1,AGO1-4,AGO2	0	0	0	1	0	0	0	1.4979	2.066	1
MIMAT0000419	hsa-miR-27b-3p	ENSG00000143384	MCL1	protein_coding	chr1	150575749	150575756	150575749	150575756	-	5	1	AGO1-4,AGO2	1	0	0	0	0	0	0	1.482	1.167	10
MIMAT0000448	hsa-miR-136-5p	ENSG00000143384	MCL1	protein_coding	chr1	150576117	150576122	150576117	150576122	-	2	0	AGO1-4,AGO2	1	0	0	0	0	0	0	1.44	0.931	5
MIMAT0005886	hsa-miR-1297	ENSG00000143384	MCL1	protein_coding	chr1	150576759	150576764	150576758	150576774	-	29	0	AGO1,AGO1-4,AGO2	1	0	0	0	1	1	1	1.4204	1.911	0
MIMAT0000095	hsa-miR-96-5p	ENSG00000143384	MCL1	protein_coding	chr1	150575083	150575088	150575083	150575088	-	4	0	AGO1-4,AGO2	1	0	0	0	0	0	0	1.4171	0.917	15
MIMAT0019908	hsa-miR-4761-5p	ENSG00000143384	MCL1	protein_coding	chr1	150574699	150574727	150574699	150574727	-	21	0	AGO1-4,AGO2	0	0	0	1	0	0	0	1.4041	0.331	3
MIMAT0002814	hsa-miR-432-5p	ENSG00000143384	MCL1	protein_coding	chr1	150577297	150577303	150577296	150577324	-	12	0	AGO1,AGO1-4,AGO2	1	0	1	1	0	0	0	1.3913	0.626	2
MIMAT0005795	hsa-miR-1323	ENSG00000143384	MCL1	protein_coding	chr1	150575968	150575973	150575968	150575973	-	2	0	AGO1,AGO2	1	0	0	0	0	0	0	1.388	1.261	1
MIMAT0006764	hsa-miR-320d	ENSG00000143384	MCL1	protein_coding	chr1	150575800	150575806	150575799	150575827	-	19	0	AGO1,AGO1-4,AGO2	1	0	1	1	1	0	0	1.3838	0.081	5
MIMAT0000261	hsa-miR-183-5p	ENSG00000143384	MCL1	protein_coding	chr1	150576038	150576044	150576038	150576044	-	107	0	AGO1,AGO1-4,AGO2,AGO3	1	0	0	0	0	0	0	1.3758	3.364	14
MIMAT0004688	hsa-miR-374a-3p	ENSG00000143384	MCL1	protein_coding	chr1	150576460	150576466	150576459	150576487	-	12	0	AGO1-4,AGO2	0	0	1	1	0	0	0	1.3724	0.628	10
MIMAT0000684	hsa-miR-302a-3p	ENSG00000143384	MCL1	protein_coding	chr1	150575144	150575150	150575143	150575171	-	3	0	AGO1-4	1	0	1	1	1	1	1	1.3689	3.658	1
MIMAT0000719	hsa-miR-367-3p	ENSG00000143384	MCL1	protein_coding	chr1	150574212	150574232	150574212	150574232	-	0	0	NA	0	1	0	0	0	0	0	1.3581	-0.527	0
MIMAT0004763	hsa-miR-488-3p	ENSG00000143384	MCL1	protein_coding	chr1	150575683	150575688	150575683	150575688	-	0	0	NA	1	0	1	0	0	0	0	1.351	-0.256	9
MIMAT0022300	hsa-miR-5590-3p	ENSG00000143384	MCL1	protein_coding	chr1	150576788	150576794	150576787	150576815	-	6	0	AGO1,AGO2	0	0	1	1	0	0	0	1.3391	0.477	3
MIMAT0000715	hsa-miR-302b-3p	ENSG00000143384	MCL1	protein_coding	chr1	150575144	150575150	150575143	150575171	-	3	0	AGO1-4	1	0	1	1	1	0	1	1.3351	3.658	1
MIMAT0002836	hsa-miR-526b-3p	ENSG00000143384	MCL1	protein_coding	chr1	150575143	150575149	150575142	150575170	-	3	0	AGO1-4	0	0	1	1	0	1	1	1.3217	3.535	0
MIMAT0000719	hsa-miR-367-3p	ENSG00000143384	MCL1	protein_coding	chr1	150577357	150577363	150577356	150577374	-	21	0	AGO1,AGO1-4,AGO2	0	0	0	0	2	1	0	1.3026	1.607	0
MIMAT0004807	hsa-miR-624-3p	ENSG00000143384	MCL1	protein_coding	chr1	150577064	150577069	150577064	150577069	-	10	0	AGO1,AGO2	1	0	1	0	0	0	0	1.3007	0.658	2
MIMAT0000090	hsa-miR-32-5p	ENSG00000143384	MCL1	protein_coding	chr1	150577357	150577363	150577356	150577374	-	21	0	AGO1,AGO1-4,AGO2	0	0	0	0	2	1	0	1.3005	1.607	7
MIMAT0001532	hsa-miR-448	ENSG00000143384	MCL1	protein_coding	chr1	150576453	150576458	150576453	150576458	-	4	0	AGO2	1	0	1	0	0	0	0	1.2993	1.303	4
MIMAT0003215	hsa-miR-552-3p	ENSG00000143384	MCL1	protein_coding	chr1	150576571	150576576	150576571	150576576	-	1	0	AGO1	1	0	1	0	0	0	0	1.2961	0.652	7
MIMAT0004957	hsa-miR-760	ENSG00000143384	MCL1	protein_coding	chr1	150575246	150575252	150575246	150575252	-	1	0	AGO2	1	0	1	0	0	0	0	1.2914	0.637	5
MIMAT0002843	hsa-miR-520b	ENSG00000143384	MCL1	protein_coding	chr1	150575144	150575150	150575143	150575171	-	3	0	AGO1-4	1	0	1	1	1	0	1	1.2894	3.658	0
MIMAT0004763	hsa-miR-488-3p	ENSG00000143384	MCL1	protein_coding	chr1	150576360	150576365	150576360	150576365	-	1	0	AGO1	1	0	1	0	0	0	0	1.2891	0.316	9
MIMAT0018944	hsa-miR-4429	ENSG00000143384	MCL1	protein_coding	chr1	150576558	150576563	150576557	150576585	-	6	1	AGO1,AGO1-4,AGO2	0	0	1	1	0	1	0	1.2853	1.182	0
MIMAT0015023	hsa-miR-3150a-3p	ENSG00000143384	MCL1	protein_coding	chr1	150575712	150575718	150575712	150575718	-	4	0	AGO1,AGO1-4,AGO2	0	0	1	0	0	0	0	1.2809	-0.427	0
MIMAT0019731	hsa-miR-4662a-5p	ENSG00000143384	MCL1	protein_coding	chr1	150579418	150579446	150579418	150579446	-	2	0	AGO2	0	0	0	1	0	0	0	1.2782	0.203	9
MIMAT0000074	hsa-miR-19b-3p	ENSG00000143384	MCL1	protein_coding	chr1	150575926	150575932	150575926	150575932	-	4	0	AGO1-4,AGO2	1	0	0	0	0	0	0	1.2761	0.468	7
MIMAT0000439	hsa-miR-153-3p	ENSG00000143384	MCL1	protein_coding	chr1	150576453	150576459	150576452	150576474	-	10	0	AGO2	1	0	1	0	1	1	1	1.276	1.258	4
MIMAT0000721	hsa-miR-369-3p	ENSG00000143384	MCL1	protein_coding	chr1	150576035	150576040	150576035	150576040	-	104	0	AGO1,AGO1-4,AGO2,AGO3	1	0	0	0	0	0	0	1.2697	1.697	4
MIMAT0010357	hsa-miR-670-5p	ENSG00000143384	MCL1	protein_coding	chr1	150574755	150574761	150574754	150574782	-	22	1	AGO1,AGO1-4,AGO2	0	0	1	1	0	1	0	1.2621	2.584	5
MIMAT0000436	hsa-miR-144-3p	ENSG00000143384	MCL1	protein_coding	chr1	150576907	150576912	150576907	150576912	-	28	0	AGO1,AGO1-4,AGO2	1	0	1	0	0	0	0	1.256	1.23	2
MIMAT0004922	hsa-miR-875-5p	ENSG00000143384	MCL1	protein_coding	chr1	150575305	150575310	150575305	150575310	-	2	0	AGO1-4,AGO2	1	0	0	0	0	0	0	1.2476	0.322	1
MIMAT0000082	hsa-miR-26a-5p	ENSG00000143384	MCL1	protein_coding	chr1	150576759	150576765	150576758	150576781	-	31	0	AGO1,AGO1-4,AGO2	1	0	0	0	1	1	1	1.245	1.902	3
MIMAT0002171	hsa-miR-410-3p	ENSG00000143384	MCL1	protein_coding	chr1	150575173	150575178	150575173	150575178	-	1	0	AGO1-4	1	0	0	0	0	0	0	1.2439	3.204	4
MIMAT0016870	hsa-miR-4319	ENSG00000143384	MCL1	protein_coding	chr1	150574756	150574761	150574755	150574783	-	22	1	AGO1,AGO1-4,AGO2	0	0	1	1	0	1	1	1.2439	2.8	0
MIMAT0004810	hsa-miR-629-5p	ENSG00000143384	MCL1	protein_coding	chr1	150575744	150575749	150575744	150575749	-	5	0	AGO1-4,AGO2	1	0	0	0	0	0	0	1.2415	0.632	10
MIMAT0005793	hsa-miR-320c	ENSG00000143384	MCL1	protein_coding	chr1	150575800	150575806	150575799	150575827	-	19	0	AGO1,AGO1-4,AGO2	1	0	1	1	1	0	0	1.2353	0.081	2
MIMAT0004688	hsa-miR-374a-3p	ENSG00000143384	MCL1	protein_coding	chr1	150575401	150575407	150575400	150575428	-	4	0	AGO1-4,AGO2	0	0	1	1	0	0	0	1.2328	0.851	10
MIMAT0000073	hsa-miR-19a-3p	ENSG00000143384	MCL1	protein_coding	chr1	150575926	150575932	150575926	150575932	-	4	0	AGO1-4,AGO2	1	0	0	0	0	0	0	1.2326	0.468	6
MIMAT0019899	hsa-miR-4756-5p	ENSG00000143384	MCL1	protein_coding	chr1	150575717	150575723	150575717	150575723	-	4	0	AGO1,AGO1-4,AGO2	0	0	1	0	0	0	0	1.2296	-0.858	3
MIMAT0003245	hsa-miR-580-3p	ENSG00000143384	MCL1	protein_coding	chr1	150576712	150576718	150576712	150576718	-	15	0	AGO1,AGO1-4,AGO2	1	0	0	0	0	0	0	1.225	0.524	3
MIMAT0005798	hsa-miR-1185-5p	ENSG00000143384	MCL1	protein_coding	chr1	150576720	150576726	150576719	150576747	-	38	0	AGO1,AGO1-4,AGO2	1	0	1	1	0	0	0	1.2218	0.249	2
MIMAT0004960	hsa-miR-208b-3p	ENSG00000143384	MCL1	protein_coding	chr1	150574770	150574777	150574770	150574777	-	17	0	AGO1,AGO1-4,AGO2	1	0	0	0	0	0	0	1.2217	1.174	1
MIMAT0004185	hsa-miR-802	ENSG00000143384	MCL1	protein_coding	chr1	150576305	150576310	150576305	150576310	-	3	0	AGO1-4,AGO2	1	0	0	0	0	0	0	1.2152	-0.078	4
MIMAT0000436	hsa-miR-144-3p	ENSG00000143384	MCL1	protein_coding	chr1	150576991	150576996	150576991	150576996	-	13	0	AGO1-4,AGO2	1	0	1	0	0	0	0	1.2146	-0.572	2
MIMAT0000717	hsa-miR-302c-3p	ENSG00000143384	MCL1	protein_coding	chr1	150575144	150575150	150575143	150575171	-	3	0	AGO1-4	1	0	1	1	1	0	1	1.2025	3.658	0
MIMAT0004605	hsa-miR-129-2-3p	ENSG00000143384	MCL1	protein_coding	chr1	150574954	150574961	150574954	150574961	-	2	0	AGO2	1	0	0	0	0	0	0	1.1885	0.293	6
MIMAT0003247	hsa-miR-582-5p	ENSG00000143384	MCL1	protein_coding	chr1	150576493	150576499	150576492	150576520	-	10	0	AGO1-4,AGO2	1	0	0	1	0	0	0	1.1845	0.866	10
MIMAT0000081	hsa-miR-25-3p	ENSG00000143384	MCL1	protein_coding	chr1	150577357	150577363	150577356	150577374	-	21	0	AGO1,AGO1-4,AGO2	0	0	0	0	2	1	0	1.174	1.607	8
MIMAT0017992	hsa-miR-3614-5p	ENSG00000143384	MCL1	protein_coding	chr1	150576844	150576850	150576844	150576850	-	1	0	AGO1	0	0	1	0	0	0	0	1.1708	0.143	1
MIMAT0004675	hsa-miR-219a-2-3p	ENSG00000143384	MCL1	protein_coding	chr1	150576715	150576720	150576715	150576720	-	15	0	AGO1,AGO1-4,AGO2	1	0	1	0	0	0	0	1.1685	0.114	2
MIMAT0002846	hsa-miR-520c-3p	ENSG00000143384	MCL1	protein_coding	chr1	150575144	150575150	150575143	150575171	-	3	0	AGO1-4	1	0	1	1	1	0	1	1.1665	3.658	0
MIMAT0002816	hsa-miR-494-3p	ENSG00000143384	MCL1	protein_coding	chr1	150574607	150574612	150574607	150574614	-	12	0	AGO1,AGO1-4,AGO2	1	0	1	0	0	0	0	1.1552	2.12	1
MIMAT0002832	hsa-miR-519c-3p	ENSG00000143384	MCL1	protein_coding	chr1	150575144	150575149	150575144	150575149	-	3	0	AGO1-4	1	0	0	0	0	0	0	1.1532	3.723	1
MIMAT0000274	hsa-miR-217	ENSG00000143384	MCL1	protein_coding	chr1	150577308	150577314	150577307	150577326	-	13	0	AGO1,AGO1-4,AGO2	1	0	1	0	1	0	0	1.1499	1.236	2
MIMAT0000510	hsa-miR-320a	ENSG00000143384	MCL1	protein_coding	chr1	150575800	150575806	150575799	150575827	-	19	0	AGO1,AGO1-4,AGO2	1	0	1	1	1	0	0	1.1497	0.081	8
MIMAT0004785	hsa-miR-545-5p	ENSG00000143384	MCL1	protein_coding	chr1	150575972	150576000	150575972	150576000	-	16	0	AGO1,AGO1-4,AGO2	0	0	0	1	0	0	0	1.1497	0.837	2
MIMAT0005792	hsa-miR-320b	ENSG00000143384	MCL1	protein_coding	chr1	150575800	150575806	150575799	150575827	-	19	0	AGO1,AGO1-4,AGO2	1	0	1	1	1	0	0	1.1497	0.081	5
MIMAT0000736	hsa-miR-381-3p	ENSG00000143384	MCL1	protein_coding	chr1	150575474	150575481	150575474	150575481	-	0	2	NA	1	0	0	0	0	0	0	1.1474	0.095	3
MIMAT0006764	hsa-miR-320d	ENSG00000143384	MCL1	protein_coding	chr1	150576558	150576564	150576557	150576585	-	6	1	AGO1,AGO1-4,AGO2	1	0	1	1	1	1	0	1.1425	0.981	5
MIMAT0005931	hsa-miR-302e	ENSG00000143384	MCL1	protein_coding	chr1	150575144	150575150	150575143	150575171	-	3	0	AGO1-4	1	0	1	1	1	1	1	1.142	3.658	0
MIMAT0002819	hsa-miR-193b-3p	ENSG00000143384	MCL1	protein_coding	chr1	150576961	150576966	150576960	150576988	-	23	0	AGO1,AGO1-4,AGO2	1	0	1	1	0	0	0	1.1419	0.342	10
MIMAT0004807	hsa-miR-624-3p	ENSG00000143384	MCL1	protein_coding	chr1	150576099	150576104	150576099	150576104	-	3	0	AGO1-4,AGO2	1	0	1	0	0	0	0	1.1417	1.439	2
MIMAT0000439	hsa-miR-153-3p	ENSG00000143384	MCL1	protein_coding	chr1	150576346	150576351	150576346	150576351	-	0	0	NA	1	0	1	0	0	0	0	1.1411	-0.017	4
MIMAT0004775	hsa-miR-502-3p	ENSG00000143384	MCL1	protein_coding	chr1	150575062	150575067	150575062	150575067	-	6	0	AGO1-4,AGO2	1	0	0	0	0	0	0	1.1335	-0.282	7
MIMAT0000072	hsa-miR-18a-5p	ENSG00000143384	MCL1	protein_coding	chr1	150574701	150574706	150574701	150574706	-	19	0	AGO1-4,AGO2	1	0	0	0	0	0	0	1.1251	1.264	5
MIMAT0000281	hsa-miR-224-5p	ENSG00000143384	MCL1	protein_coding	chr1	150576297	150576302	150576297	150576302	-	4	0	AGO1-4,AGO2	1	0	0	0	0	0	0	1.1243	0.302	3
MIMAT0002876	hsa-miR-505-3p	ENSG00000143384	MCL1	protein_coding	chr1	150577350	150577355	150577350	150577355	-	17	0	AGO1-4,AGO2	1	0	0	0	0	0	0	1.123	1.147	7
MIMAT0004780	hsa-miR-532-3p	ENSG00000143384	MCL1	protein_coding	chr1	150575612	150575618	150575612	150575618	-	2	0	AGO2	1	0	0	0	0	0	0	1.123	0.05	10
MIMAT0002830	hsa-miR-520f-3p	ENSG00000143384	MCL1	protein_coding	chr1	150575145	150575151	150575144	150575172	-	3	0	AGO1-4	1	0	1	1	0	0	1	1.1211	3.379	1
MIMAT0000432	hsa-miR-141-3p	ENSG00000143384	MCL1	protein_coding	chr1	150576985	150576990	150576985	150576990	-	10	0	AGO1-4,AGO2	1	0	0	0	0	0	0	1.119	0.629	13
MIMAT0005944	hsa-miR-1252-5p	ENSG00000143384	MCL1	protein_coding	chr1	150576252	150576258	150576252	150576258	-	3	0	AGO1,AGO2	1	0	0	0	0	0	0	1.1164	1.263	1
MIMAT0000718	hsa-miR-302d-3p	ENSG00000143384	MCL1	protein_coding	chr1	150575144	150575150	150575143	150575171	-	3	0	AGO1-4	1	0	1	1	1	0	1	1.1155	3.658	2
MIMAT0000084	hsa-miR-27a-3p	ENSG00000143384	MCL1	protein_coding	chr1	150575749	150575756	150575749	150575756	-	5	1	AGO1-4,AGO2	1	0	0	0	0	0	0	1.115	1.167	0
MIMAT0019731	hsa-miR-4662a-5p	ENSG00000143384	MCL1	protein_coding	chr1	150577228	150577256	150577228	150577256	-	6	0	AGO1-4,AGO2	0	0	0	1	0	0	0	1.1109	0.525	9
MIMAT0004774	hsa-miR-501-3p	ENSG00000143384	MCL1	protein_coding	chr1	150576145	150576150	150576145	150576150	-	1	0	AGO2	1	0	0	0	0	0	0	1.1019	0.994	9
MIMAT0000265	hsa-miR-204-5p	ENSG00000143384	MCL1	protein_coding	chr1	150574834	150574834	150574828	150574840	-	1	0	AGO1-4	2	0	0	0	0	0	1	1.0976	0.359	11
MIMAT0002830	hsa-miR-520f-3p	ENSG00000143384	MCL1	protein_coding	chr1	150576973	150576979	150576972	150577000	-	24	0	AGO1,AGO1-4,AGO2	1	0	1	1	0	0	1	1.0976	1.69	1
MIMAT0002849	hsa-miR-524-5p	ENSG00000143384	MCL1	protein_coding	chr1	150575475	150575482	150575475	150575482	-	0	2	NA	1	0	0	0	0	0	0	1.0976	0.022	1
MIMAT0015008	hsa-miR-3140-3p	ENSG00000143384	MCL1	protein_coding	chr1	150575410	150575415	150575409	150575437	-	2	0	AGO1-4,AGO2	0	0	1	1	0	0	0	1.0976	1.135	1
MIMAT0017992	hsa-miR-3614-5p	ENSG00000143384	MCL1	protein_coding	chr1	150574938	150574944	150574938	150574944	-	2	0	AGO2	0	0	1	0	0	0	0	1.0922	-0.096	1
MIMAT0004785	hsa-miR-545-5p	ENSG00000143384	MCL1	protein_coding	chr1	150576991	150577019	150576991	150577019	-	25	0	AGO1-4,AGO2	0	0	0	1	0	0	0	1.0854	0.049	2
MIMAT0000450	hsa-miR-149-5p	ENSG00000143384	MCL1	protein_coding	chr1	150577036	150577041	150577036	150577041	-	19	0	AGO1,AGO1-4,AGO2	1	0	0	0	0	0	0	1.0742	0.58	7
MIMAT0004807	hsa-miR-624-3p	ENSG00000143384	MCL1	protein_coding	chr1	150575941	150575947	150575941	150575947	-	3	0	AGO1-4,AGO2	1	0	1	0	0	0	0	1.0719	1.239	2
MIMAT0002853	hsa-miR-519d-3p	ENSG00000143384	MCL1	protein_coding	chr1	150575143	150575149	150575142	150575170	-	3	0	AGO1-4	1	0	1	1	1	0	1	1.0701	3.535	0
MIMAT0000703	hsa-miR-361-5p	ENSG00000143384	MCL1	protein_coding	chr1	150576461	150576467	150576460	150576488	-	12	0	AGO1-4,AGO2	1	0	0	1	1	0	0	1.0666	0.764	13
MIMAT0000318	hsa-miR-200b-3p	ENSG00000143384	MCL1	protein_coding	chr1	150576418	150576423	150576418	150576423	-	1	0	AGO2	1	0	0	0	0	0	0	1.0654	1.724	9
MIMAT0005933	hsa-miR-1277-3p	ENSG00000143384	MCL1	protein_coding	chr1	150574860	150574865	150574860	150574865	-	5	0	AGO1-4,AGO2	1	0	0	0	0	0	0	1.0643	0.253	4
MIMAT0000456	hsa-miR-186-5p	ENSG00000143384	MCL1	protein_coding	chr1	150576362	150576369	150576361	150576389	-	2	0	AGO1,AGO2	1	0	0	1	1	0	0	1.0631	0.192	12
MIMAT0002175	hsa-miR-485-5p	ENSG00000143384	MCL1	protein_coding	chr1	150576915	150576920	150576915	150576920	-	28	0	AGO1,AGO1-4,AGO2	1	0	0	0	0	0	0	1.0565	0.634	3
MIMAT0022698	hsa-miR-345-3p	ENSG00000143384	MCL1	protein_coding	chr1	150574755	150574761	150574755	150574761	-	18	0	AGO1,AGO1-4,AGO2	0	0	0	0	0	1	0	1.0565	2.584	8
MIMAT0000222	hsa-miR-192-5p	ENSG00000143384	MCL1	protein_coding	chr1	150575237	150575242	150575236	150575258	-	1	0	AGO2	1	0	0	0	1	0	0	1.0488	0.624	13
MIMAT0000272	hsa-miR-215-5p	ENSG00000143384	MCL1	protein_coding	chr1	150575237	150575242	150575236	150575258	-	1	0	AGO2	1	0	0	0	1	0	0	1.0488	0.624	7
MIMAT0000268	hsa-miR-211-5p	ENSG00000143384	MCL1	protein_coding	chr1	150574834	150574834	150574828	150574840	-	1	0	AGO1-4	2	0	0	0	0	0	1	1.0443	0.359	5
MIMAT0000429	hsa-miR-137	ENSG00000143384	MCL1	protein_coding	chr1	150576269	150576274	150576269	150576274	-	5	0	AGO1,AGO1-4,AGO2	1	0	0	0	0	0	0	1.0435	0.731	2
MIMAT0002818	hsa-miR-496	ENSG00000143384	MCL1	protein_coding	chr1	150576266	150576272	150576265	150576282	-	6	0	AGO1,AGO1-4,AGO2	1	0	0	0	1	0	0	1.0435	0.331	3
MIMAT0001532	hsa-miR-448	ENSG00000143384	MCL1	protein_coding	chr1	150576489	150576494	150576489	150576494	-	11	0	AGO1-4,AGO2	1	0	1	0	0	0	0	1.042	1.06	4
MIMAT0005930	hsa-miR-1276	ENSG00000143384	MCL1	protein_coding	chr1	150575777	150575782	150575777	150575782	-	4	0	AGO1,AGO2	1	0	0	0	0	0	0	1.0414	0.313	6
MIMAT0000722	hsa-miR-370-3p	ENSG00000143384	MCL1	protein_coding	chr1	150575661	150575666	150575661	150575666	-	7	0	AGO1,AGO1-4,AGO2	1	0	1	0	0	0	0	1.0399	-0.54	1
MIMAT0019917	hsa-miR-4766-5p	ENSG00000143384	MCL1	protein_coding	chr1	150577151	150577156	150577151	150577156	-	1	0	AGO1-4	0	0	1	0	0	0	0	1.0394	1.098	3
MIMAT0000681	hsa-miR-29c-3p	ENSG00000143384	MCL1	protein_coding	chr1	150576040	150576045	150576039	150576067	-	112	0	AGO1,AGO1-4,AGO2,AGO3	1	0	1	1	1	1	1	1.0377	4.147	6
MIMAT0000100	hsa-miR-29b-3p	ENSG00000143384	MCL1	protein_coding	chr1	150576040	150576045	150576039	150576067	-	112	0	AGO1,AGO1-4,AGO2,AGO3	1	0	1	1	1	1	1	1.036	4.147	5
MIMAT0017992	hsa-miR-3614-5p	ENSG00000143384	MCL1	protein_coding	chr1	150577247	150577252	150577247	150577252	-	1	0	AGO1-4	0	0	1	0	0	0	0	1.0351	0.455	1
MIMAT0000424	hsa-miR-128-3p	ENSG00000143384	MCL1	protein_coding	chr1	150575750	150575756	150575749	150575767	-	6	1	AGO1-4,AGO2	1	0	0	0	1	0	0	1.0337	1.285	13
MIMAT0002853	hsa-miR-519d-3p	ENSG00000143384	MCL1	protein_coding	chr1	150574676	150574682	150574676	150574682	-	3	0	AGO2	1	0	0	0	0	0	0	1.0333	0.356	0
MIMAT0002883	hsa-miR-514a-3p	ENSG00000143384	MCL1	protein_coding	chr1	150575541	150575547	150575541	150575547	-	2	0	AGO1,AGO1-4	1	0	0	0	0	0	0	1.0325	-0.5	8
MIMAT0002834	hsa-miR-520a-3p	ENSG00000143384	MCL1	protein_coding	chr1	150575144	150575150	150575143	150575171	-	3	0	AGO1-4	1	0	1	1	1	0	1	1.0299	3.658	0
MIMAT0000099	hsa-miR-101-3p	ENSG00000143384	MCL1	protein_coding	chr1	150576907	150576913	150576906	150576934	-	38	0	AGO1,AGO1-4,AGO2	1	0	1	1	1	0	1	1.0197	1.071	6
MIMAT0000086	hsa-miR-29a-3p	ENSG00000143384	MCL1	protein_coding	chr1	150576040	150576045	150576039	150576067	-	112	0	AGO1,AGO1-4,AGO2,AGO3	1	0	1	1	1	1	1	1.0188	4.147	4
MIMAT0015008	hsa-miR-3140-3p	ENSG00000143384	MCL1	protein_coding	chr1	150575148	150575153	150575148	150575153	-	3	0	AGO1-4	0	0	1	0	0	0	0	1.0188	2.264	1
MIMAT0011159	hsa-miR-2115-3p	ENSG00000143384	MCL1	protein_coding	chr1	150576278	150576283	150576278	150576283	-	5	0	AGO1,AGO1-4,AGO2	0	0	1	0	0	0	0	1.0177	1.566	1
MIMAT0005793	hsa-miR-320c	ENSG00000143384	MCL1	protein_coding	chr1	150576558	150576564	150576557	150576585	-	6	1	AGO1,AGO1-4,AGO2	1	0	1	1	1	1	0	1.0146	0.981	2
MIMAT0005903	hsa-miR-1251-5p	ENSG00000143384	MCL1	protein_coding	chr1	150575225	150575231	150575225	150575231	-	1	0	AGO2	1	0	1	0	0	0	0	1.0139	0.876	9
MIMAT0004793	hsa-miR-556-3p	ENSG00000143384	MCL1	protein_coding	chr1	150575653	150575660	150575653	150575660	-	9	0	AGO1-4,AGO2	1	0	0	0	0	0	0	1.0066	0.158	5
MIMAT0004903	hsa-miR-300	ENSG00000143384	MCL1	protein_coding	chr1	150575474	150575481	150575474	150575481	-	0	2	NA	1	0	0	0	0	0	0	1.0066	0.095	0
MIMAT0000241	hsa-miR-208a-3p	ENSG00000143384	MCL1	protein_coding	chr1	150574770	150574777	150574770	150574777	-	17	0	AGO1,AGO1-4,AGO2	1	0	0	0	0	0	0	1	1.174	2
MIMAT0003215	hsa-miR-552-3p	ENSG00000143384	MCL1	protein_coding	chr1	150576954	150576959	150576954	150576959	-	19	0	AGO1,AGO1-4,AGO2	1	0	1	0	0	0	0	0.9968	-0.224	7
MIMAT0004702	hsa-miR-339-3p	ENSG00000143384	MCL1	protein_coding	chr1	150574803	150574809	150574803	150574809	-	2	0	AGO1-4	1	0	1	0	0	0	0	0.9947	0.373	11
MIMAT0004949	hsa-miR-877-5p	ENSG00000143384	MCL1	protein_coding	chr1	150575829	150575834	150575829	150575834	-	17	0	AGO1,AGO1-4,AGO2	1	0	0	0	0	0	0	0.9914	0.194	9
MIMAT0000281	hsa-miR-224-5p	ENSG00000143384	MCL1	protein_coding	chr1	150577348	150577353	150577347	150577368	-	29	0	AGO1,AGO1-4,AGO2	1	0	0	0	2	0	0	0.986	1.157	3
MIMAT0004814	hsa-miR-654-3p	ENSG00000143384	MCL1	protein_coding	chr1	150576111	150576116	150576111	150576116	-	3	0	AGO1-4,AGO2	1	0	0	0	0	0	0	0.98	0.955	3
MIMAT0000102	hsa-miR-105-5p	ENSG00000143384	MCL1	protein_coding	chr1	150575363	150575368	150575362	150575368	-	2	0	AGO1-4	1	0	1	0	0	1	0	0.9767	0.583	3
MIMAT0022724	hsa-miR-1277-5p	ENSG00000143384	MCL1	protein_coding	chr1	150575379	150575407	150575379	150575407	-	4	0	AGO1-4	0	0	0	1	0	0	0	0.9756	0.229	1
MIMAT0003339	hsa-miR-421	ENSG00000143384	MCL1	protein_coding	chr1	150577061	150577066	150577061	150577066	-	10	0	AGO1,AGO2	1	0	0	0	0	0	0	0.9731	0.177	9
MIMAT0022300	hsa-miR-5590-3p	ENSG00000143384	MCL1	protein_coding	chr1	150575141	150575146	150575140	150575168	-	3	1	AGO1-4	0	0	1	1	0	1	1	0.9721	3.074	3
MIMAT0004775	hsa-miR-502-3p	ENSG00000143384	MCL1	protein_coding	chr1	150576145	150576150	150576145	150576150	-	1	0	AGO2	1	0	0	0	0	0	0	0.9656	0.994	7
MIMAT0005919	hsa-miR-548o-3p	ENSG00000143384	MCL1	protein_coding	chr1	150575968	150575973	150575968	150575973	-	2	0	AGO1,AGO2	1	0	0	0	0	0	0	0.9656	1.261	2
MIMAT0000460	hsa-miR-194-5p	ENSG00000143384	MCL1	protein_coding	chr1	150576019	150576024	150576019	150576024	-	76	0	AGO1,AGO1-4,AGO2,AGO3	1	0	0	0	0	0	0	0.9612	2.251	12
MIMAT0000682	hsa-miR-200a-3p	ENSG00000143384	MCL1	protein_coding	chr1	150576985	150576990	150576985	150576990	-	10	0	AGO1-4,AGO2	1	0	0	0	0	0	0	0.9612	0.629	9
MIMAT0005789	hsa-miR-513c-5p	ENSG00000143384	MCL1	protein_coding	chr1	150575620	150575625	150575620	150575625	-	6	0	AGO1-4,AGO2	1	0	0	0	0	0	0	0.9578	-0.746	5
MIMAT0015037	hsa-miR-3163	ENSG00000143384	MCL1	protein_coding	chr1	150575565	150575593	150575565	150575593	-	1	0	AGO1-4	0	0	0	1	0	0	0	0.9545	-0.028	0
MIMAT0025475	hsa-miR-6509-3p	ENSG00000143384	MCL1	protein_coding	chr1	150576473	150576478	150576473	150576478	-	9	0	AGO2	0	0	1	0	0	0	0	0.9545	0.57	0
MIMAT0003881	hsa-miR-668-3p	ENSG00000143384	MCL1	protein_coding	chr1	150574795	150574800	150574795	150574800	-	3	0	AGO1-4,AGO2	1	0	1	0	0	0	0	0.9533	0.13	2
MIMAT0018104	hsa-miR-3679-5p	ENSG00000143384	MCL1	protein_coding	chr1	150574842	150574870	150574842	150574870	-	6	0	AGO1-4,AGO2	0	0	0	1	0	0	0	0.9491	0.611	3
MIMAT0000723	hsa-miR-371a-3p	ENSG00000143384	MCL1	protein_coding	chr1	150575753	150575758	150575753	150575758	-	3	1	AGO1-4,AGO2	1	0	0	0	0	0	0	0.9449	1.466	4
MIMAT0019917	hsa-miR-4766-5p	ENSG00000143384	MCL1	protein_coding	chr1	150576173	150576178	150576173	150576178	-	1	0	AGO2	0	0	1	0	0	0	0	0.9442	1.474	3
MIMAT0000762	hsa-miR-324-3p	ENSG00000143384	MCL1	protein_coding	chr1	150574962	150574968	150574962	150574969	-	2	0	AGO2	1	0	1	0	0	0	0	0.9427	-0.652	11
MIMAT0003311	hsa-miR-641	ENSG00000143384	MCL1	protein_coding	chr1	150574771	150574776	150574771	150574776	-	15	0	AGO1,AGO1-4,AGO2	1	0	0	0	0	0	0	0.9424	1.498	5
MIMAT0000073	hsa-miR-19a-3p	ENSG00000143384	MCL1	protein_coding	chr1	150577275	150577280	150577275	150577280	-	3	0	AGO1-4,AGO2	1	0	0	0	0	0	0	0.9374	0.254	6
MIMAT0004916	hsa-miR-888-5p	ENSG00000143384	MCL1	protein_coding	chr1	150576258	150576264	150576258	150576264	-	7	0	AGO1,AGO2	1	0	0	0	0	0	0	0.9372	1.084	5
MIMAT0004924	hsa-miR-876-5p	ENSG00000143384	MCL1	protein_coding	chr1	150574845	150574850	150574845	150574850	-	2	0	AGO1-4,AGO2	1	0	0	0	0	0	0	0.9346	0.554	7
MIMAT0000419	hsa-miR-27b-3p	ENSG00000143384	MCL1	protein_coding	chr1	150575638	150575643	150575638	150575643	-	11	0	AGO1-4,AGO2	1	0	0	0	0	0	0	0.9327	-0.106	10
MIMAT0001532	hsa-miR-448	ENSG00000143384	MCL1	protein_coding	chr1	150576346	150576352	150576345	150576365	-	2	0	AGO1	1	0	1	0	1	0	0	0.9323	-0.004	4
MIMAT0002816	hsa-miR-494-3p	ENSG00000143384	MCL1	protein_coding	chr1	150575964	150575969	150575963	150575991	-	8	0	AGO1,AGO2	1	0	1	1	0	0	0	0.9323	1.377	1
MIMAT0004793	hsa-miR-556-3p	ENSG00000143384	MCL1	protein_coding	chr1	150576935	150576940	150576935	150576940	-	32	0	AGO1,AGO1-4,AGO2	1	0	0	0	0	0	0	0.9201	-0.134	5
MIMAT0002817	hsa-miR-495-3p	ENSG00000143384	MCL1	protein_coding	chr1	150575893	150575900	150575892	150575920	-	3	0	AGO1-4	1	0	0	1	1	0	0	0.9157	0.435	1
MIMAT0000456	hsa-miR-186-5p	ENSG00000143384	MCL1	protein_coding	chr1	150576651	150576656	150576650	150576678	-	19	0	AGO1,AGO1-4,AGO2	1	0	0	1	0	0	0	0.9091	0.842	12
MIMAT0005886	hsa-miR-1297	ENSG00000143384	MCL1	protein_coding	chr1	150575674	150575679	150575674	150575679	-	1	0	AGO1	1	0	0	0	0	0	0	0.9067	0.184	0
MIMAT0000459	hsa-miR-193a-3p	ENSG00000143384	MCL1	protein_coding	chr1	150576961	150576966	150576960	150576988	-	23	0	AGO1,AGO1-4,AGO2	1	0	1	1	0	0	0	0.8969	0.342	1
MIMAT0003247	hsa-miR-582-5p	ENSG00000143384	MCL1	protein_coding	chr1	150576921	150576926	150576920	150576948	-	45	1	AGO1,AGO1-4,AGO2	1	0	0	1	0	0	0	0.8939	0.39	10
MIMAT0000427	hsa-miR-133a-3p	ENSG00000143384	MCL1	protein_coding	chr1	150574645	150574651	150574644	150574672	-	1	0	AGO2	1	0	1	1	1	1	1	0.881	3.069	3
MIMAT0019899	hsa-miR-4756-5p	ENSG00000143384	MCL1	protein_coding	chr1	150575832	150575837	150575832	150575837	-	19	0	AGO1,AGO1-4,AGO2	0	0	1	0	0	0	0	0.8801	0.783	3
MIMAT0005936	hsa-miR-1278	ENSG00000143384	MCL1	protein_coding	chr1	150576909	150576915	150576909	150576915	-	28	0	AGO1,AGO1-4,AGO2	1	0	0	0	0	0	0	0.868	0.997	2
MIMAT0005952	hsa-miR-1321	ENSG00000143384	MCL1	protein_coding	chr1	150575832	150575837	150575832	150575837	-	19	0	AGO1,AGO1-4,AGO2	1	0	1	0	0	0	0	0.8645	0.783	0
MIMAT0003311	hsa-miR-641	ENSG00000143384	MCL1	protein_coding	chr1	150575558	150575563	150575558	150575563	-	1	0	AGO1-4	1	0	0	0	0	0	0	0.8567	-0.404	5
MIMAT0002890	hsa-miR-299-5p	ENSG00000143384	MCL1	protein_coding	chr1	150575425	150575430	150575425	150575430	-	1	0	AGO2	1	0	0	0	0	0	0	0.8492	0.592	1
MIMAT0019868	hsa-miR-4739	ENSG00000143384	MCL1	protein_coding	chr1	150575717	150575723	150575717	150575723	-	4	0	AGO1,AGO1-4,AGO2	0	0	1	0	0	0	0	0.8459	-0.858	1
MIMAT0004692	hsa-miR-340-5p	ENSG00000143384	MCL1	protein_coding	chr1	150576829	150576834	150576829	150576834	-	3	0	AGO2	1	0	0	0	0	0	0	0.8381	-0.023	5
MIMAT0003247	hsa-miR-582-5p	ENSG00000143384	MCL1	protein_coding	chr1	150576990	150576995	150576989	150577017	-	24	0	AGO1-4,AGO2	1	0	0	1	0	0	0	0.8303	-0.751	10
MIMAT0004692	hsa-miR-340-5p	ENSG00000143384	MCL1	protein_coding	chr1	150574903	150574908	150574903	150574908	-	1	0	AGO2	1	0	0	0	0	0	0	0.826	-0.226	5
MIMAT0000724	hsa-miR-372-3p	ENSG00000143384	MCL1	protein_coding	chr1	150575144	150575150	150575143	150575171	-	3	0	AGO1-4	1	0	1	1	1	0	1	0.825	3.658	1
MIMAT0000433	hsa-miR-142-5p	ENSG00000143384	MCL1	protein_coding	chr1	150576788	150576794	150576787	150576815	-	6	0	AGO1,AGO2	1	0	1	1	0	0	0	0.8226	0.477	2
MIMAT0003241	hsa-miR-576-5p	ENSG00000143384	MCL1	protein_coding	chr1	150574814	150574819	150574814	150574819	-	0	0	NA	1	0	0	0	0	0	0	0.8182	0.35	7
MIMAT0007881	hsa-miR-1908-5p	ENSG00000143384	MCL1	protein_coding	chr1	150577010	150577015	150577010	150577015	-	13	0	AGO1-4,AGO2	0	0	1	0	0	0	0	0.8165	0.282	1
MIMAT0018944	hsa-miR-4429	ENSG00000143384	MCL1	protein_coding	chr1	150575800	150575806	150575799	150575827	-	19	0	AGO1,AGO1-4,AGO2	0	0	1	1	0	0	0	0.8086	0.081	0
MIMAT0000075	hsa-miR-20a-5p	ENSG00000143384	MCL1	protein_coding	chr1	150575143	150575149	150575142	150575170	-	3	0	AGO1-4	1	0	1	1	1	1	1	0.8042	3.535	7
MIMAT0015023	hsa-miR-3150a-3p	ENSG00000143384	MCL1	protein_coding	chr1	150577196	150577202	150577196	150577202	-	5	0	AGO1-4,AGO2	0	0	1	0	0	0	0	0.8037	0.251	0
MIMAT0000510	hsa-miR-320a	ENSG00000143384	MCL1	protein_coding	chr1	150576558	150576563	150576557	150576585	-	6	1	AGO1,AGO1-4,AGO2	1	0	1	1	1	1	0	0.7849	1.182	8
MIMAT0005792	hsa-miR-320b	ENSG00000143384	MCL1	protein_coding	chr1	150576558	150576564	150576557	150576585	-	6	1	AGO1,AGO1-4,AGO2	1	0	1	1	1	1	0	0.7849	0.981	5
MIMAT0005793	hsa-miR-320c	ENSG00000143384	MCL1	protein_coding	chr1	150576893	150576898	150576892	150576920	-	29	0	AGO1,AGO1-4,AGO2	1	0	1	1	0	0	0	0.7841	0.697	2
MIMAT0000078	hsa-miR-23a-3p	ENSG00000143384	MCL1	protein_coding	chr1	150575054	150575059	150575054	150575059	-	6	0	AGO1-4,AGO2	1	0	0	0	0	0	0	0.7816	-0.616	3
MIMAT0000773	hsa-miR-346	ENSG00000143384	MCL1	protein_coding	chr1	150576486	150576491	150576486	150576491	-	10	0	AGO1-4,AGO2	1	0	0	0	0	0	0	0.7793	0.384	2
MIMAT0005952	hsa-miR-1321	ENSG00000143384	MCL1	protein_coding	chr1	150575717	150575723	150575717	150575723	-	4	0	AGO1,AGO1-4,AGO2	1	0	1	0	0	0	0	0.7778	-0.858	0
MIMAT0019731	hsa-miR-4662a-5p	ENSG00000143384	MCL1	protein_coding	chr1	150578353	150578381	150578353	150578381	-	18	0	AGO1-4,AGO2	0	0	0	1	0	0	0	0.7771	4.105	9
MIMAT0000726	hsa-miR-373-3p	ENSG00000143384	MCL1	protein_coding	chr1	150575144	150575150	150575143	150575171	-	3	0	AGO1-4	1	0	1	1	1	0	1	0.7741	3.658	1
MIMAT0000757	hsa-miR-151a-3p	ENSG00000143384	MCL1	protein_coding	chr1	150576051	150576056	150576051	150576056	-	92	0	AGO1,AGO1-4,AGO2,AGO3	1	0	0	0	0	0	0	0.7607	0.832	7
MIMAT0002816	hsa-miR-494-3p	ENSG00000143384	MCL1	protein_coding	chr1	150574730	150574735	150574729	150574757	-	26	0	AGO1,AGO1-4,AGO2	1	0	1	1	0	0	0	0.7605	-0.317	1
MIMAT0000251	hsa-miR-147a	ENSG00000143384	MCL1	protein_coding	chr1	150576014	150576017	150576012	150576019	-	58	0	AGO1,AGO1-4,AGO2,AGO3	2	0	0	0	0	0	0	0.7548	0.697	0
MIMAT0000092	hsa-miR-92a-3p	ENSG00000143384	MCL1	protein_coding	chr1	150577357	150577363	150577356	150577374	-	21	0	AGO1,AGO1-4,AGO2	0	0	0	0	2	1	0	0.7539	1.607	8
MIMAT0005903	hsa-miR-1251-5p	ENSG00000143384	MCL1	protein_coding	chr1	150576524	150576529	150576524	150576529	-	4	0	AGO1-4,AGO2	1	0	1	0	0	0	0	0.7537	0.794	9
MIMAT0000448	hsa-miR-136-5p	ENSG00000143384	MCL1	protein_coding	chr1	150577118	150577123	150577118	150577123	-	0	0	NA	1	0	0	0	0	0	0	0.7497	-0.432	5
MIMAT0004947	hsa-miR-885-5p	ENSG00000143384	MCL1	protein_coding	chr1	150575279	150575286	150575279	150575286	-	4	0	AGO1-4,AGO2	1	0	0	0	0	0	0	0.7482	1.914	8
MIMAT0000099	hsa-miR-101-3p	ENSG00000143384	MCL1	protein_coding	chr1	150576991	150576996	150576990	150577018	-	26	0	AGO1-4,AGO2	1	0	1	1	0	0	0	0.7468	-0.572	6
MIMAT0000703	hsa-miR-361-5p	ENSG00000143384	MCL1	protein_coding	chr1	150575402	150575407	150575401	150575429	-	3	0	AGO1-4,AGO2	1	0	0	1	0	0	0	0.7461	0.791	13
MIMAT0000705	hsa-miR-362-5p	ENSG00000143384	MCL1	protein_coding	chr1	150574810	150574815	150574809	150574837	-	3	0	AGO1-4	1	0	0	1	0	0	0	0.7368	0.525	14
MIMAT0005798	hsa-miR-1185-5p	ENSG00000143384	MCL1	protein_coding	chr1	150574843	150574848	150574842	150574870	-	6	0	AGO1-4,AGO2	1	0	1	1	0	0	0	0.734	0.755	2
MIMAT0002856	hsa-miR-520d-3p	ENSG00000143384	MCL1	protein_coding	chr1	150575144	150575150	150575143	150575171	-	3	0	AGO1-4	1	0	1	1	1	0	1	0.7328	3.658	0
MIMAT0002824	hsa-miR-498	ENSG00000143384	MCL1	protein_coding	chr1	150575854	150575859	150575854	150575859	-	16	0	AGO1,AGO1-4,AGO2	1	0	0	0	0	0	0	0.7275	0.974	0
MIMAT0000770	hsa-miR-133b	ENSG00000143384	MCL1	protein_coding	chr1	150574645	150574651	150574644	150574672	-	1	0	AGO2	1	0	1	1	1	1	1	0.7258	3.069	3
MIMAT0002870	hsa-miR-499a-5p	ENSG00000143384	MCL1	protein_coding	chr1	150574770	150574775	150574770	150574775	-	17	0	AGO1,AGO1-4,AGO2	1	0	0	0	0	0	0	0.7213	1.124	9
MIMAT0011159	hsa-miR-2115-3p	ENSG00000143384	MCL1	protein_coding	chr1	150576462	150576467	150576462	150576467	-	7	0	AGO2	0	0	1	0	0	0	0	0.7206	0.879	1
MIMAT0000722	hsa-miR-370-3p	ENSG00000143384	MCL1	protein_coding	chr1	150576059	150576064	150576059	150576064	-	62	0	AGO1,AGO1-4,AGO2	1	0	1	0	0	0	0	0.7151	0.889	1
MIMAT0003338	hsa-miR-660-5p	ENSG00000143384	MCL1	protein_coding	chr1	150575645	150575650	150575645	150575650	-	9	0	AGO1-4,AGO2	1	0	0	0	0	0	0	0.7128	-0.544	5
MIMAT0000720	hsa-miR-376c-3p	ENSG00000143384	MCL1	protein_coding	chr1	150575209	150575214	150575208	150575228	-	1	0	AGO2	1	0	0	0	1	0	0	0.71	0.873	2
MIMAT0000084	hsa-miR-27a-3p	ENSG00000143384	MCL1	protein_coding	chr1	150575638	150575643	150575638	150575643	-	11	0	AGO1-4,AGO2	1	0	0	0	0	0	0	0.7073	-0.106	0
MIMAT0002817	hsa-miR-495-3p	ENSG00000143384	MCL1	protein_coding	chr1	150577133	150577138	150577132	150577160	-	1	0	AGO1-4	1	0	0	1	0	0	0	0.705	-0.48	1
MIMAT0001541	hsa-miR-449a	ENSG00000143384	MCL1	protein_coding	chr1	150575267	150575272	150575267	150575272	-	6	0	AGO1,AGO1-4,AGO2	1	0	0	0	0	0	0	0.694	1.047	6
MIMAT0000617	hsa-miR-200c-3p	ENSG00000143384	MCL1	protein_coding	chr1	150576418	150576423	150576418	150576423	-	1	0	AGO2	1	0	0	0	0	0	0	0.6818	1.724	14
MIMAT0002858	hsa-miR-520g-3p	ENSG00000143384	MCL1	protein_coding	chr1	150576815	150576820	150576815	150576820	-	2	0	AGO2	1	0	1	0	0	0	0	0.6778	0.39	0
MIMAT0022705	hsa-miR-539-3p	ENSG00000143384	MCL1	protein_coding	chr1	150575012	150575017	150575012	150575017	-	1	0	AGO2	0	0	1	0	0	0	0	0.6777	0.339	1
MIMAT0017992	hsa-miR-3614-5p	ENSG00000143384	MCL1	protein_coding	chr1	150575065	150575070	150575065	150575070	-	6	0	AGO1-4,AGO2	0	0	1	0	0	0	0	0.6744	0.193	1
MIMAT0019868	hsa-miR-4739	ENSG00000143384	MCL1	protein_coding	chr1	150575832	150575837	150575832	150575837	-	19	0	AGO1,AGO1-4,AGO2	0	0	1	0	0	0	0	0.6741	0.783	1
MIMAT0000763	hsa-miR-338-3p	ENSG00000143384	MCL1	protein_coding	chr1	150575737	150575742	150575737	150575742	-	6	0	AGO1-4,AGO2	1	0	0	0	0	0	0	0.674	-0.29	6
MIMAT0002868	hsa-miR-522-3p	ENSG00000143384	MCL1	protein_coding	chr1	150576247	150576252	150576247	150576252	-	2	0	AGO1	1	0	0	0	0	0	0	0.674	0.301	1
MIMAT0001413	hsa-miR-20b-5p	ENSG00000143384	MCL1	protein_coding	chr1	150575143	150575149	150575142	150575164	-	3	0	AGO1-4	1	0	1	0	1	1	1	0.6737	3.535	8
MIMAT0000261	hsa-miR-183-5p	ENSG00000143384	MCL1	protein_coding	chr1	150575790	150575795	150575790	150575795	-	3	0	AGO1,AGO2	1	0	0	0	0	0	0	0.663	0.107	14
MIMAT0002825	hsa-miR-520e	ENSG00000143384	MCL1	protein_coding	chr1	150575144	150575150	150575143	150575171	-	3	0	AGO1-4	1	0	1	1	1	1	1	0.6597	3.658	0
MIMAT0000074	hsa-miR-19b-3p	ENSG00000143384	MCL1	protein_coding	chr1	150577275	150577280	150577275	150577280	-	3	0	AGO1-4,AGO2	1	0	0	0	0	0	0	0.6564	0.254	7
MIMAT0005789	hsa-miR-513c-5p	ENSG00000143384	MCL1	protein_coding	chr1	150576384	150576389	150576384	150576389	-	1	0	AGO2	1	0	0	0	0	0	0	0.6552	0.64	5
MIMAT0002823	hsa-miR-512-3p	ENSG00000143384	MCL1	protein_coding	chr1	150576973	150576978	150576972	150577000	-	24	0	AGO1,AGO1-4,AGO2	1	0	0	1	0	0	0	0.6529	1.674	1
MIMAT0002849	hsa-miR-524-5p	ENSG00000143384	MCL1	protein_coding	chr1	150576688	150576693	150576688	150576693	-	17	0	AGO1,AGO1-4,AGO2	1	0	0	0	0	0	0	0.6529	2.126	1
MIMAT0002171	hsa-miR-410-3p	ENSG00000143384	MCL1	protein_coding	chr1	150576349	150576354	150576349	150576354	-	0	0	NA	1	0	0	0	0	0	0	0.6515	0.134	4
MIMAT0004953	hsa-miR-873-5p	ENSG00000143384	MCL1	protein_coding	chr1	150575866	150575871	150575866	150575871	-	12	0	AGO1,AGO1-4,AGO2	1	0	0	0	0	0	0	0.6515	0.602	5
MIMAT0019917	hsa-miR-4766-5p	ENSG00000143384	MCL1	protein_coding	chr1	150575519	150575524	150575519	150575524	-	1	0	AGO1	0	0	1	0	0	0	0	0.6515	1.142	3
MIMAT0004687	hsa-miR-371a-5p	ENSG00000143384	MCL1	protein_coding	chr1	150576259	150576264	150576259	150576264	-	7	0	AGO1,AGO2	1	0	0	0	0	0	0	0.65	0.633	0
MIMAT0002845	hsa-miR-526a	ENSG00000143384	MCL1	protein_coding	chr1	150576525	150576530	150576525	150576530	-	4	0	AGO1-4,AGO2	1	0	0	0	0	0	0	0.6485	0.918	0
MIMAT0005455	hsa-miR-520c-5p	ENSG00000143384	MCL1	protein_coding	chr1	150576525	150576530	150576525	150576530	-	4	0	AGO1-4,AGO2	1	0	0	0	0	0	0	0.6485	0.918	0
MIMAT0005456	hsa-miR-518d-5p	ENSG00000143384	MCL1	protein_coding	chr1	150576525	150576530	150576525	150576530	-	4	0	AGO1-4,AGO2	1	0	0	0	0	0	0	0.6485	0.918	0
MIMAT0004955	hsa-miR-374b-5p	ENSG00000143384	MCL1	protein_coding	chr1	150576082	150576087	150576081	150576102	-	19	0	AGO1-4,AGO2	1	0	0	0	1	0	0	0.6407	1.229	5
MIMAT0000102	hsa-miR-105-5p	ENSG00000143384	MCL1	protein_coding	chr1	150576261	150576266	150576261	150576266	-	7	0	AGO1,AGO2	1	0	1	0	0	0	0	0.6384	0.522	3
MIMAT0004682	hsa-miR-361-3p	ENSG00000143384	MCL1	protein_coding	chr1	150575552	150575557	150575552	150575557	-	2	0	AGO1,AGO1-4	1	0	0	0	0	0	0	0.6342	-0.468	3
MIMAT0000083	hsa-miR-26b-5p	ENSG00000143384	MCL1	protein_coding	chr1	150575674	150575679	150575674	150575679	-	1	0	AGO1	1	0	0	0	0	0	0	0.6318	0.184	6
MIMAT0003215	hsa-miR-552-3p	ENSG00000143384	MCL1	protein_coding	chr1	150576824	150576829	150576824	150576829	-	2	0	AGO2	1	0	1	0	0	0	0	0.6318	1.071	7
MIMAT0000682	hsa-miR-200a-3p	ENSG00000143384	MCL1	protein_coding	chr1	150574732	150574737	150574732	150574737	-	11	0	AGO1-4,AGO2	1	0	0	0	0	0	0	0.6297	0.039	9
MIMAT0015008	hsa-miR-3140-3p	ENSG00000143384	MCL1	protein_coding	chr1	150576062	150576067	150576061	150576089	-	57	0	AGO1,AGO1-4,AGO2	0	0	1	1	0	0	0	0.6297	1.2	1
MIMAT0004675	hsa-miR-219a-2-3p	ENSG00000143384	MCL1	protein_coding	chr1	150575023	150575028	150575023	150575028	-	1	0	AGO2	1	0	1	0	0	0	0	0.6231	0.034	2
MIMAT0000727	hsa-miR-374a-5p	ENSG00000143384	MCL1	protein_coding	chr1	150576350	150576355	150576350	150576355	-	0	0	NA	1	0	0	0	0	0	0	0.6219	-0.377	5
MIMAT0004683	hsa-miR-362-3p	ENSG00000143384	MCL1	protein_coding	chr1	150574610	150574615	150574610	150574615	-	10	0	AGO1,AGO1-4,AGO2	1	0	0	0	0	0	0	0.6219	1.748	3
MIMAT0000450	hsa-miR-149-5p	ENSG00000143384	MCL1	protein_coding	chr1	150577258	150577263	150577258	150577263	-	2	0	AGO1-4	1	0	0	0	0	0	0	0.6129	0.808	7
MIMAT0000070	hsa-miR-17-5p	ENSG00000143384	MCL1	protein_coding	chr1	150575143	150575149	150575142	150575164	-	3	0	AGO1-4	1	0	1	0	1	1	1	0.6101	3.535	10
MIMAT0000093	hsa-miR-93-5p	ENSG00000143384	MCL1	protein_coding	chr1	150575143	150575149	150575142	150575164	-	3	0	AGO1-4	1	0	1	0	1	1	1	0.6101	3.535	9
MIMAT0000103	hsa-miR-106a-5p	ENSG00000143384	MCL1	protein_coding	chr1	150575143	150575149	150575142	150575170	-	3	0	AGO1-4	1	0	1	1	1	1	1	0.6101	3.535	11
MIMAT0002882	hsa-miR-510-5p	ENSG00000143384	MCL1	protein_coding	chr1	150575727	150575733	150575727	150575733	-	7	0	AGO1,AGO1-4,AGO2	1	0	0	0	0	0	0	0.6057	0.321	4
MIMAT0015008	hsa-miR-3140-3p	ENSG00000143384	MCL1	protein_coding	chr1	150575094	150575099	150575093	150575121	-	3	0	AGO1-4,AGO2	0	0	1	1	0	0	0	0.5987	0.565	1
MIMAT0018992	hsa-miR-4465	ENSG00000143384	MCL1	protein_coding	chr1	150576759	150576765	150576759	150576765	-	27	0	AGO1,AGO1-4,AGO2	0	0	0	0	0	1	1	0.5924	1.902	1
MIMAT0002813	hsa-miR-493-5p	ENSG00000143384	MCL1	protein_coding	chr1	150574723	150574729	150574722	150574750	-	28	0	AGO1,AGO1-4,AGO2	0	0	0	1	0	1	0	0.5908	-0.272	0
MIMAT0000255	hsa-miR-34a-5p	ENSG00000143384	MCL1	protein_coding	chr1	150575267	150575272	150575267	150575272	-	6	0	AGO1,AGO1-4,AGO2	1	0	0	0	0	0	0	0.5843	1.047	6
MIMAT0000737	hsa-miR-382-5p	ENSG00000143384	MCL1	protein_coding	chr1	150576589	150576594	150576589	150576594	-	1	0	AGO1	1	0	0	0	0	0	0	0.5843	1.138	2
MIMAT0003218	hsa-miR-92b-3p	ENSG00000143384	MCL1	protein_coding	chr1	150577357	150577363	150577356	150577374	-	21	0	AGO1,AGO1-4,AGO2	0	0	0	0	2	1	0	0.5843	1.607	1
MIMAT0004920	hsa-miR-541-3p	ENSG00000143384	MCL1	protein_coding	chr1	150575710	150575715	150575710	150575715	-	4	0	AGO1,AGO1-4,AGO2	1	0	0	0	0	0	0	0.5843	-0.203	2
MIMAT0005792	hsa-miR-320b	ENSG00000143384	MCL1	protein_coding	chr1	150576893	150576898	150576892	150576920	-	29	0	AGO1,AGO1-4,AGO2	1	0	1	1	0	0	0	0.5843	0.697	5
MIMAT0015037	hsa-miR-3163	ENSG00000143384	MCL1	protein_coding	chr1	150575871	150575899	150575871	150575899	-	11	0	AGO1,AGO1-4,AGO2	0	0	0	1	0	0	0	0.5843	0.057	0
MIMAT0000680	hsa-miR-106b-5p	ENSG00000143384	MCL1	protein_coding	chr1	150575143	150575149	150575142	150575170	-	3	0	AGO1-4	1	0	1	1	1	1	1	0.5842	3.535	14
MIMAT0002877	hsa-miR-513a-5p	ENSG00000143384	MCL1	protein_coding	chr1	150575749	150575754	150575749	150575754	-	5	0	AGO1-4,AGO2	1	0	0	0	0	0	0	0.58	0.876	3
MIMAT0016894	hsa-miR-4262	ENSG00000143384	MCL1	protein_coding	chr1	150575283	150575289	150575283	150575289	-	5	0	AGO1-4,AGO2	0	0	0	0	0	1	1	0.5796	2.645	0
MIMAT0001412	hsa-miR-18b-5p	ENSG00000143384	MCL1	protein_coding	chr1	150574701	150574706	150574701	150574706	-	19	0	AGO1-4,AGO2	1	0	0	0	0	0	0	0.5769	1.264	5
MIMAT0000452	hsa-miR-154-5p	ENSG00000143384	MCL1	protein_coding	chr1	150575877	150575882	150575877	150575882	-	4	0	AGO1,AGO1-4,AGO2	1	0	0	0	0	0	0	0.5765	0.186	1
MIMAT0001629	hsa-miR-329-3p	ENSG00000143384	MCL1	protein_coding	chr1	150574610	150574615	150574610	150574615	-	10	0	AGO1,AGO1-4,AGO2	1	0	0	0	0	0	0	0.5765	1.748	2
MIMAT0000735	hsa-miR-380-3p	ENSG00000143384	MCL1	protein_coding	chr1	150576624	150576629	150576624	150576629	-	7	0	AGO1-4,AGO2	1	0	0	0	0	0	0	0.5664	0.27	3
MIMAT0002831	hsa-miR-519c-5p	ENSG00000143384	MCL1	protein_coding	chr1	150576525	150576530	150576525	150576530	-	4	0	AGO1-4,AGO2	1	0	0	0	0	0	0	0.5654	0.918	0
MIMAT0005454	hsa-miR-519b-5p	ENSG00000143384	MCL1	protein_coding	chr1	150576525	150576530	150576525	150576530	-	4	0	AGO1-4,AGO2	1	0	0	0	0	0	0	0.5654	0.918	0
MIMAT0000268	hsa-miR-211-5p	ENSG00000143384	MCL1	protein_coding	chr1	150576899	150576904	150576899	150576904	-	20	0	AGO1,AGO1-4,AGO2	1	0	0	0	0	0	0	0.5576	0.349	5
MIMAT0003327	hsa-miR-449b-5p	ENSG00000143384	MCL1	protein_coding	chr1	150575267	150575272	150575267	150575272	-	6	0	AGO1,AGO1-4,AGO2	1	0	0	0	0	0	0	0.5576	1.047	4
MIMAT0000690	hsa-miR-296-5p	ENSG00000143384	MCL1	protein_coding	chr1	150575036	150575042	150575036	150575042	-	4	0	AGO1-4,AGO2	1	0	1	0	0	0	0	0.5517	0.023	4
MIMAT0002823	hsa-miR-512-3p	ENSG00000143384	MCL1	protein_coding	chr1	150575145	150575150	150575144	150575172	-	3	0	AGO1-4	1	0	0	1	0	0	0	0.5466	3.631	1
MIMAT0001075	hsa-miR-384	ENSG00000143384	MCL1	protein_coding	chr1	150576576	150576581	150576576	150576581	-	2	0	AGO1,AGO1-4	1	0	0	0	0	0	0	0.5427	0.628	0
MIMAT0001532	hsa-miR-448	ENSG00000143384	MCL1	protein_coding	chr1	150577310	150577315	150577310	150577315	-	9	0	AGO1,AGO1-4,AGO2	1	0	1	0	0	0	0	0.5391	1.766	4
MIMAT0000510	hsa-miR-320a	ENSG00000143384	MCL1	protein_coding	chr1	150576893	150576898	150576892	150576920	-	29	0	AGO1,AGO1-4,AGO2	1	0	1	1	0	0	0	0.5388	0.697	8
MIMAT0000439	hsa-miR-153-3p	ENSG00000143384	MCL1	protein_coding	chr1	150576489	150576494	150576489	150576494	-	11	0	AGO1-4,AGO2	1	0	1	0	0	0	0	0.5266	1.06	4
MIMAT0001536	hsa-miR-429	ENSG00000143384	MCL1	protein_coding	chr1	150576418	150576423	150576418	150576423	-	1	0	AGO2	1	0	0	0	0	0	0	0.5266	1.724	11
MIMAT0005458	hsa-miR-1224-5p	ENSG00000143384	MCL1	protein_coding	chr1	150576719	150576724	150576719	150576724	-	16	0	AGO1,AGO1-4,AGO2	1	0	0	0	0	0	0	0.5263	0.286	9
MIMAT0002807	hsa-miR-491-5p	ENSG00000143384	MCL1	protein_coding	chr1	150575033	150575038	150575033	150575038	-	3	0	AGO1-4,AGO2	1	0	1	0	0	0	0	0.5203	-0.032	3
MIMAT0002867	hsa-miR-520h	ENSG00000143384	MCL1	protein_coding	chr1	150576542	150576547	150576542	150576547	-	2	0	AGO1-4,AGO2	1	0	1	0	0	0	0	0.5203	0.838	2
MIMAT0002867	hsa-miR-520h	ENSG00000143384	MCL1	protein_coding	chr1	150576815	150576820	150576815	150576820	-	2	0	AGO2	1	0	1	0	0	0	0	0.52	0.39	2
MIMAT0006764	hsa-miR-320d	ENSG00000143384	MCL1	protein_coding	chr1	150576893	150576898	150576892	150576920	-	29	0	AGO1,AGO1-4,AGO2	1	0	1	1	0	0	0	0.5186	0.697	5
MIMAT0018944	hsa-miR-4429	ENSG00000143384	MCL1	protein_coding	chr1	150576893	150576898	150576892	150576920	-	29	0	AGO1,AGO1-4,AGO2	0	0	1	1	0	0	0	0.5134	0.697	0
MIMAT0002821	hsa-miR-181d-5p	ENSG00000143384	MCL1	protein_coding	chr1	150575284	150575289	150575283	150575289	-	5	0	AGO1-4,AGO2	1	0	0	0	0	0	1	0.5041	2.868	6
MIMAT0000438	hsa-miR-152-3p	ENSG00000143384	MCL1	protein_coding	chr1	150575752	150575757	150575752	150575757	-	3	1	AGO1-4,AGO2	1	0	0	0	0	0	0	0.5017	1.379	4
MIMAT0005903	hsa-miR-1251-5p	ENSG00000143384	MCL1	protein_coding	chr1	150577281	150577286	150577281	150577286	-	2	0	AGO1-4,AGO2	1	0	1	0	0	0	0	0.5017	0.822	9
MIMAT0025475	hsa-miR-6509-3p	ENSG00000143384	MCL1	protein_coding	chr1	150575073	150575079	150575073	150575079	-	5	0	AGO1-4,AGO2	0	0	1	0	0	0	0	0.489	1.085	0
MIMAT0003330	hsa-miR-654-5p	ENSG00000143384	MCL1	protein_coding	chr1	150575710	150575715	150575710	150575715	-	4	0	AGO1,AGO1-4,AGO2	1	0	0	0	0	0	0	0.4812	-0.203	0
MIMAT0018104	hsa-miR-3679-5p	ENSG00000143384	MCL1	protein_coding	chr1	150576719	150576747	150576719	150576747	-	38	0	AGO1,AGO1-4,AGO2	0	0	0	1	0	0	0	0.4719	0.458	3
MIMAT0005955	hsa-miR-1197	ENSG00000143384	MCL1	protein_coding	chr1	150575862	150575867	150575862	150575867	-	13	0	AGO1,AGO1-4,AGO2	1	0	0	0	0	0	0	0.4692	0.53	2
MIMAT0004955	hsa-miR-374b-5p	ENSG00000143384	MCL1	protein_coding	chr1	150576350	150576355	150576350	150576355	-	0	0	NA	1	0	0	0	0	0	0	0.4667	-0.377	5
MIMAT0000232	hsa-miR-199a-3p	ENSG00000143384	MCL1	protein_coding	chr1	150575405	150575410	150575405	150575410	-	1	0	AGO1-4	1	0	0	0	0	0	0	0.4638	0.829	4
MIMAT0004563	hsa-miR-199b-3p	ENSG00000143384	MCL1	protein_coding	chr1	150575405	150575410	150575405	150575410	-	1	0	AGO1-4	1	0	0	0	0	0	0	0.4638	0.829	4
MIMAT0000100	hsa-miR-29b-3p	ENSG00000143384	MCL1	protein_coding	chr1	150575642	150575647	150575642	150575647	-	10	0	AGO1-4,AGO2	1	0	1	0	0	0	0	0.4616	-0.142	5
MIMAT0000681	hsa-miR-29c-3p	ENSG00000143384	MCL1	protein_coding	chr1	150575642	150575647	150575642	150575647	-	10	0	AGO1-4,AGO2	1	0	1	0	0	0	0	0.4479	-0.142	6
MIMAT0000727	hsa-miR-374a-5p	ENSG00000143384	MCL1	protein_coding	chr1	150576082	150576087	150576081	150576102	-	19	0	AGO1-4,AGO2	1	0	0	0	1	0	0	0.4479	1.229	5
MIMAT0000728	hsa-miR-375	ENSG00000143384	MCL1	protein_coding	chr1	150576469	150576474	150576469	150576474	-	8	0	AGO2	1	0	0	0	0	0	0	0.4479	1.046	10
MIMAT0002817	hsa-miR-495-3p	ENSG00000143384	MCL1	protein_coding	chr1	150575966	150575971	150575965	150575993	-	8	0	AGO1,AGO2	1	0	0	1	0	0	0	0.4479	1.804	1
MIMAT0002814	hsa-miR-432-5p	ENSG00000143384	MCL1	protein_coding	chr1	150576846	150576851	150576845	150576873	-	1	0	AGO1	1	0	1	1	0	0	0	0.4475	0.133	2
MIMAT0004953	hsa-miR-873-5p	ENSG00000143384	MCL1	protein_coding	chr1	150574586	150574591	150574585	150574605	-	20	0	AGO1,AGO1-4,AGO2	1	0	0	0	1	0	1	0.4413	1.69	5
MIMAT0002806	hsa-miR-490-3p	ENSG00000143384	MCL1	protein_coding	chr1	150576449	150576454	150576449	150576454	-	3	0	AGO2	1	0	0	0	0	0	0	0.4291	1.19	5
MIMAT0000736	hsa-miR-381-3p	ENSG00000143384	MCL1	protein_coding	chr1	150576677	150576698	150576677	150576698	-	23	0	AGO1,AGO1-4,AGO2	0	0	0	0	1	0	0	0.4213	1.938	3
MIMAT0002868	hsa-miR-522-3p	ENSG00000143384	MCL1	protein_coding	chr1	150575317	150575322	150575317	150575322	-	2	0	AGO1-4,AGO2	1	0	0	0	0	0	0	0.4213	1.162	1
MIMAT0000082	hsa-miR-26a-5p	ENSG00000143384	MCL1	protein_coding	chr1	150575674	150575679	150575674	150575679	-	1	0	AGO1	1	0	0	0	0	0	0	0.4024	0.184	3
MIMAT0000265	hsa-miR-204-5p	ENSG00000143384	MCL1	protein_coding	chr1	150576899	150576904	150576899	150576904	-	20	0	AGO1,AGO1-4,AGO2	1	0	0	0	0	0	0	0.4024	0.349	11
MIMAT0005789	hsa-miR-513c-5p	ENSG00000143384	MCL1	protein_coding	chr1	150577059	150577064	150577059	150577064	-	10	0	AGO1,AGO2	1	0	0	0	0	0	0	0.4007	0.204	5
MIMAT0002855	hsa-miR-520d-5p	ENSG00000143384	MCL1	protein_coding	chr1	150575475	150575482	150575475	150575482	-	0	2	NA	1	0	0	0	0	0	0	0.4	0.022	2
MIMAT0004985	hsa-miR-942-5p	ENSG00000143384	MCL1	protein_coding	chr1	150576977	150576983	150576977	150576983	-	15	0	AGO1,AGO1-4,AGO2	1	0	0	0	0	0	0	0.388	1.028	8
MIMAT0002855	hsa-miR-520d-5p	ENSG00000143384	MCL1	protein_coding	chr1	150576688	150576693	150576688	150576693	-	17	0	AGO1,AGO1-4,AGO2	1	0	0	0	0	0	0	0.3854	2.126	2
MIMAT0000686	hsa-miR-34c-5p	ENSG00000143384	MCL1	protein_coding	chr1	150575267	150575272	150575267	150575272	-	6	0	AGO1,AGO1-4,AGO2	1	0	0	0	0	0	0	0.3786	1.047	2
MIMAT0002858	hsa-miR-520g-3p	ENSG00000143384	MCL1	protein_coding	chr1	150576542	150576547	150576542	150576547	-	2	0	AGO1-4,AGO2	1	0	1	0	0	0	0	0.3763	0.838	0
MIMAT0004748	hsa-miR-423-5p	ENSG00000143384	MCL1	protein_coding	chr1	150575531	150575536	150575531	150575536	-	1	0	AGO1	1	0	0	0	0	0	0	0.3733	0.541	10
MIMAT0002858	hsa-miR-520g-3p	ENSG00000143384	MCL1	protein_coding	chr1	150577135	150577140	150577135	150577140	-	0	0	NA	1	0	1	0	0	0	0	0.3729	-0.358	0
MIMAT0000102	hsa-miR-105-5p	ENSG00000143384	MCL1	protein_coding	chr1	150576108	150576113	150576107	150576113	-	4	0	AGO1-4,AGO2	1	0	1	0	0	1	0	0.3669	0.847	3
MIMAT0000755	hsa-miR-323a-3p	ENSG00000143384	MCL1	protein_coding	chr1	150574631	150574636	150574631	150574636	-	2	0	AGO2	1	0	0	0	0	0	0	0.3546	1.057	2
MIMAT0000435	hsa-miR-143-3p	ENSG00000143384	MCL1	protein_coding	chr1	150575252	150575257	150575252	150575257	-	1	0	AGO2	1	0	0	0	0	0	0	0.3531	0.535	3
MIMAT0000424	hsa-miR-128-3p	ENSG00000143384	MCL1	protein_coding	chr1	150575007	150575012	150575007	150575012	-	1	1	AGO2	1	0	0	0	0	0	0	0.3473	0.745	13
MIMAT0004692	hsa-miR-340-5p	ENSG00000143384	MCL1	protein_coding	chr1	150575817	150575822	150575817	150575822	-	11	0	AGO1,AGO1-4,AGO2	1	0	0	0	0	0	0	0.3425	0.043	5
MIMAT0000443	hsa-miR-125a-5p	ENSG00000143384	MCL1	protein_coding	chr1	150574756	150574762	150574755	150574783	-	22	1	AGO1,AGO1-4,AGO2	1	0	1	1	1	0	1	0.3418	3.008	12
MIMAT0019798	hsa-miR-4701-5p	ENSG00000143384	MCL1	protein_coding	chr1	150577044	150577050	150577044	150577050	-	21	0	AGO1,AGO1-4,AGO2	0	0	1	0	0	0	0	0.3382	1.27	1
MIMAT0000257	hsa-miR-181b-5p	ENSG00000143384	MCL1	protein_coding	chr1	150575284	150575289	150575283	150575289	-	5	0	AGO1-4,AGO2	1	0	0	0	0	1	1	0.3376	2.868	4
MIMAT0000432	hsa-miR-141-3p	ENSG00000143384	MCL1	protein_coding	chr1	150576842	150576847	150576842	150576847	-	1	0	AGO1	1	0	0	0	0	0	0	0.3304	0.26	13
MIMAT0000436	hsa-miR-144-3p	ENSG00000143384	MCL1	protein_coding	chr1	150575972	150575977	150575972	150575977	-	3	0	AGO1,AGO2	1	0	1	0	0	0	0	0.3268	0.489	2
MIMAT0019917	hsa-miR-4766-5p	ENSG00000143384	MCL1	protein_coding	chr1	150575907	150575912	150575907	150575912	-	3	0	AGO1-4	0	0	1	0	0	0	0	0.3194	0.924	3
MIMAT0002816	hsa-miR-494-3p	ENSG00000143384	MCL1	protein_coding	chr1	150576568	150576573	150576567	150576595	-	3	0	AGO1,AGO1-4,AGO2	1	0	1	1	0	0	0	0.3193	1.341	1
MIMAT0000428	hsa-miR-135a-5p	ENSG00000143384	MCL1	protein_coding	chr1	150575244	150575249	150575243	150575251	-	1	0	AGO2	1	0	0	0	0	0	1	0.3132	1.679	14
MIMAT0000758	hsa-miR-135b-5p	ENSG00000143384	MCL1	protein_coding	chr1	150575244	150575249	150575243	150575251	-	1	0	AGO2	1	0	0	0	0	0	1	0.3132	1.679	1
MIMAT0000086	hsa-miR-29a-3p	ENSG00000143384	MCL1	protein_coding	chr1	150575642	150575647	150575642	150575647	-	10	0	AGO1-4,AGO2	1	0	1	0	0	0	0	0.3115	-0.142	4
MIMAT0019908	hsa-miR-4761-5p	ENSG00000143384	MCL1	protein_coding	chr1	150575941	150575969	150575941	150575969	-	5	0	AGO1-4,AGO2	0	0	0	1	0	0	0	0.3	1.135	3
MIMAT0002867	hsa-miR-520h	ENSG00000143384	MCL1	protein_coding	chr1	150577135	150577140	150577135	150577140	-	0	0	NA	1	0	1	0	0	0	0	0.2971	-0.358	2
MIMAT0000459	hsa-miR-193a-3p	ENSG00000143384	MCL1	protein_coding	chr1	150577042	150577047	150577041	150577069	-	22	0	AGO1,AGO1-4,AGO2	1	0	1	1	1	1	1	0.2864	1.719	1
MIMAT0019731	hsa-miR-4662a-5p	ENSG00000143384	MCL1	protein_coding	chr1	150574862	150574890	150574862	150574890	-	6	0	AGO1-4,AGO2	0	0	0	1	0	0	0	0.2804	0.387	9
MIMAT0000432	hsa-miR-141-3p	ENSG00000143384	MCL1	protein_coding	chr1	150574732	150574737	150574732	150574737	-	11	0	AGO1-4,AGO2	1	0	0	0	0	0	0	0.2783	0.039	13
MIMAT0004924	hsa-miR-876-5p	ENSG00000143384	MCL1	protein_coding	chr1	150575079	150575084	150575079	150575084	-	5	0	AGO1-4,AGO2	1	0	0	0	0	0	0	0.2739	-0.078	7
MIMAT0004903	hsa-miR-300	ENSG00000143384	MCL1	protein_coding	chr1	150576677	150576698	150576677	150576698	-	23	0	AGO1,AGO1-4,AGO2	0	0	0	0	1	0	0	0.2661	1.938	0
MIMAT0000269	hsa-miR-212-3p	ENSG00000143384	MCL1	protein_coding	chr1	150575971	150575976	150575971	150575976	-	3	0	AGO1,AGO2	1	0	0	0	0	0	0	0.259	0.427	2
MIMAT0000456	hsa-miR-186-5p	ENSG00000143384	MCL1	protein_coding	chr1	150576402	150576407	150576401	150576429	-	3	0	AGO1,AGO2	1	0	0	1	0	0	0	0.2553	0.166	12
MIMAT0000274	hsa-miR-217	ENSG00000143384	MCL1	protein_coding	chr1	150574743	150574749	150574742	150574764	-	19	0	AGO1,AGO1-4,AGO2	1	0	1	0	1	0	0	0.2545	0.704	2
MIMAT0000099	hsa-miR-101-3p	ENSG00000143384	MCL1	protein_coding	chr1	150575972	150575977	150575971	150575999	-	15	0	AGO1,AGO1-4,AGO2	1	0	1	1	0	0	0	0.2311	0.489	6
MIMAT0004949	hsa-miR-877-5p	ENSG00000143384	MCL1	protein_coding	chr1	150574737	150574743	150574737	150574743	-	8	0	AGO1-4,AGO2	1	0	0	0	0	0	0	0.2309	1.415	9
MIMAT0011159	hsa-miR-2115-3p	ENSG00000143384	MCL1	protein_coding	chr1	150576431	150576436	150576431	150576436	-	1	0	AGO2	0	0	1	0	0	0	0	0.2287	0.657	1
MIMAT0002805	hsa-miR-489-3p	ENSG00000143384	MCL1	protein_coding	chr1	150575992	150575997	150575992	150575997	-	6	0	AGO1,AGO2	1	0	0	0	0	0	0	0.2284	0.451	3
MIMAT0000250	hsa-miR-139-5p	ENSG00000143384	MCL1	protein_coding	chr1	150576989	150576995	150576988	150577009	-	23	0	AGO1-4,AGO2	1	0	0	0	1	0	0	0.2283	-0.574	3
MIMAT0000682	hsa-miR-200a-3p	ENSG00000143384	MCL1	protein_coding	chr1	150576842	150576847	150576842	150576847	-	1	0	AGO1	1	0	0	0	0	0	0	0.2206	0.26	9
MIMAT0005923	hsa-miR-1269a	ENSG00000143384	MCL1	protein_coding	chr1	150576848	150576853	150576848	150576853	-	1	0	AGO1	1	0	0	0	0	0	0	0.2206	0.321	8
MIMAT0004502	hsa-miR-28-3p	ENSG00000143384	MCL1	protein_coding	chr1	150574735	150574740	150574735	150574740	-	9	0	AGO1-4,AGO2	1	0	0	0	0	0	0	0.214	0.905	10
MIMAT0004797	hsa-miR-582-3p	ENSG00000143384	MCL1	protein_coding	chr1	150577316	150577322	150577316	150577323	-	10	0	AGO1,AGO1-4,AGO2	1	0	1	0	0	0	0	0.2128	0.779	13
MIMAT0000256	hsa-miR-181a-5p	ENSG00000143384	MCL1	protein_coding	chr1	150575284	150575289	150575283	150575289	-	5	0	AGO1-4,AGO2	1	0	0	0	0	1	1	0.2072	2.868	5
MIMAT0001635	hsa-miR-452-5p	ENSG00000143384	MCL1	protein_coding	chr1	150575628	150575633	150575628	150575633	-	8	0	AGO1-4,AGO2	1	0	0	0	0	0	0	0.1951	-0.278	2
MIMAT0000258	hsa-miR-181c-5p	ENSG00000143384	MCL1	protein_coding	chr1	150575284	150575289	150575283	150575289	-	5	0	AGO1-4,AGO2	1	0	0	0	0	1	1	0.1911	2.868	5
MIMAT0005923	hsa-miR-1269a	ENSG00000143384	MCL1	protein_coding	chr1	150575701	150575706	150575701	150575706	-	2	0	AGO1,AGO1-4	1	0	0	0	0	0	0	0.1896	0.671	8
MIMAT0007888	hsa-miR-1913	ENSG00000143384	MCL1	protein_coding	chr1	150574962	150574968	150574962	150574968	-	2	0	AGO2	0	0	1	0	0	0	0	0.1895	-0.652	1
MIMAT0000757	hsa-miR-151a-3p	ENSG00000143384	MCL1	protein_coding	chr1	150576658	150576663	150576658	150576663	-	13	0	AGO1,AGO1-4,AGO2	1	0	0	0	0	0	0	0.1835	0.292	7
MIMAT0000433	hsa-miR-142-5p	ENSG00000143384	MCL1	protein_coding	chr1	150575141	150575146	150575140	150575168	-	3	1	AGO1-4	1	0	1	1	0	1	1	0.1823	3.074	2
MIMAT0000451	hsa-miR-150-5p	ENSG00000143384	MCL1	protein_coding	chr1	150575612	150575617	150575612	150575617	-	1	0	AGO2	1	0	0	0	0	0	0	0.1789	0.212	0
MIMAT0004922	hsa-miR-875-5p	ENSG00000143384	MCL1	protein_coding	chr1	150575014	150575019	150575014	150575019	-	1	0	AGO2	1	0	0	0	0	0	0	0.1685	0.031	1
MIMAT0000418	hsa-miR-23b-3p	ENSG00000143384	MCL1	protein_coding	chr1	150575054	150575059	150575054	150575059	-	6	0	AGO1-4,AGO2	1	0	0	0	0	0	0	0.1638	-0.616	10
MIMAT0002819	hsa-miR-193b-3p	ENSG00000143384	MCL1	protein_coding	chr1	150577042	150577047	150577041	150577069	-	22	0	AGO1,AGO1-4,AGO2	1	0	1	1	1	1	1	0.1601	1.719	10
MIMAT0003881	hsa-miR-668-3p	ENSG00000143384	MCL1	protein_coding	chr1	150575724	150575730	150575724	150575730	-	7	0	AGO1,AGO1-4,AGO2	1	0	1	0	0	0	0	0.1468	-0.352	2
MIMAT0000426	hsa-miR-132-3p	ENSG00000143384	MCL1	protein_coding	chr1	150575971	150575976	150575971	150575976	-	3	0	AGO1,AGO2	1	0	0	0	0	0	0	0.1375	0.427	2
MIMAT0004809	hsa-miR-628-5p	ENSG00000143384	MCL1	protein_coding	chr1	150577149	150577154	150577148	150577154	-	1	0	AGO1-4	1	0	0	0	0	1	0	0.1374	1.258	14
MIMAT0002867	hsa-miR-520h	ENSG00000143384	MCL1	protein_coding	chr1	150576595	150576600	150576595	150576600	-	1	0	AGO1	1	0	1	0	0	0	0	0.1335	0.239	2
MIMAT0005796	hsa-miR-1271-5p	ENSG00000143384	MCL1	protein_coding	chr1	150575083	150575088	150575083	150575088	-	4	0	AGO1-4,AGO2	1	0	0	0	0	0	0	0.1335	0.917	5
MIMAT0000705	hsa-miR-362-5p	ENSG00000143384	MCL1	protein_coding	chr1	150574990	150574996	150574989	150575017	-	1	1	AGO2	1	0	0	1	0	0	0	0.1311	-0.404	14
MIMAT0004785	hsa-miR-545-5p	ENSG00000143384	MCL1	protein_coding	chr1	150576303	150576331	150576303	150576331	-	5	0	AGO1-4,AGO2	0	0	0	1	0	0	0	0.1252	0.177	2
MIMAT0000243	hsa-miR-148a-3p	ENSG00000143384	MCL1	protein_coding	chr1	150575752	150575757	150575752	150575757	-	3	1	AGO1-4,AGO2	1	0	0	0	0	0	0	0.1231	1.379	10
MIMAT0000759	hsa-miR-148b-3p	ENSG00000143384	MCL1	protein_coding	chr1	150575752	150575757	150575752	150575757	-	3	1	AGO1-4,AGO2	1	0	0	0	0	0	0	0.1231	1.379	13
MIMAT0002858	hsa-miR-520g-3p	ENSG00000143384	MCL1	protein_coding	chr1	150576595	150576600	150576595	150576600	-	1	0	AGO1	1	0	1	0	0	0	0	0.1224	0.239	0
MIMAT0003255	hsa-miR-588	ENSG00000143384	MCL1	protein_coding	chr1	150577044	150577050	150577044	150577050	-	21	0	AGO1,AGO1-4,AGO2	1	0	1	0	0	0	0	0.1177	1.27	0
MIMAT0003241	hsa-miR-576-5p	ENSG00000143384	MCL1	protein_coding	chr1	150576854	150576859	150576854	150576859	-	1	0	AGO1	1	0	0	0	0	0	0	0.1174	-0.121	7
MIMAT0002826	hsa-miR-515-5p	ENSG00000143384	MCL1	protein_coding	chr1	150576116	150576121	150576116	150576121	-	2	0	AGO1-4,AGO2	1	0	0	0	0	0	0	0.1067	0.93	1
MIMAT0000423	hsa-miR-125b-5p	ENSG00000143384	MCL1	protein_coding	chr1	150574756	150574761	150574755	150574783	-	22	1	AGO1,AGO1-4,AGO2	1	0	1	1	1	1	1	0.0721	2.8	7
MIMAT0003326	hsa-miR-663a	ENSG00000143384	MCL1	protein_coding	chr1	150577010	150577015	150577010	150577015	-	13	0	AGO1-4,AGO2	1	0	1	0	0	0	0	0.0692	0.282	0
MIMAT0003244	hsa-miR-579-3p	ENSG00000143384	MCL1	protein_coding	chr1	150576076	150576081	150576076	150576081	-	21	0	AGO1,AGO1-4,AGO2	1	0	0	0	0	0	0	0.0662	0.795	2
MIMAT0004682	hsa-miR-361-3p	ENSG00000143384	MCL1	protein_coding	chr1	150574712	150574717	150574712	150574717	-	18	0	AGO1-4,AGO2	1	0	0	0	0	0	0	0.0444	-0.125	3
MIMAT0000271	hsa-miR-214-3p	ENSG00000143384	MCL1	protein_coding	chr1	150575738	150575744	150575738	150575744	-	6	0	AGO1-4,AGO2	1	0	0	0	0	0	0	0.0388	-0.17	2
MIMAT0002883	hsa-miR-514a-3p	ENSG00000143384	MCL1	protein_coding	chr1	150575991	150575996	150575991	150575996	-	6	0	AGO1,AGO2	1	0	0	0	0	0	0	0.0359	1.238	8
MIMAT0004692	hsa-miR-340-5p	ENSG00000143384	MCL1	protein_coding	chr1	150575174	150575179	150575174	150575179	-	1	0	AGO1-4	1	0	0	0	0	0	0	0.0315	2.974	5
MIMAT0000729	hsa-miR-376a-3p	ENSG00000143384	MCL1	protein_coding	chr1	150576926	150576931	150576926	150576931	-	32	0	AGO1,AGO1-4,AGO2	1	0	0	0	0	0	0	0.0224	0.909	2
MIMAT0000227	hsa-miR-197-3p	ENSG00000143384	MCL1	protein_coding	chr1	150576228	150576233	150576227	150576248	-	2	0	AGO1	1	0	0	0	1	0	0	0.0214	0.322	7
MIMAT0003165	hsa-miR-545-3p	ENSG00000143384	MCL1	protein_coding	chr1	150575847	150575852	150575847	150575852	-	17	0	AGO1,AGO1-4,AGO2	1	0	0	0	0	0	0	0.0214	0.56	0
MIMAT0002869	hsa-miR-519a-3p	ENSG00000143384	MCL1	protein_coding	chr1	150575144	150575149	150575144	150575149	-	3	0	AGO1-4	1	0	0	0	0	0	0	0.0107	3.723	1
MIMAT0002837	hsa-miR-519b-3p	ENSG00000143384	MCL1	protein_coding	chr1	150575144	150575149	150575144	150575149	-	3	0	AGO1-4	1	0	0	0	0	0	0	0.0026	3.723	0
MIMAT0015037	hsa-miR-3163	ENSG00000143384	MCL1	protein_coding	chr1	150574562	150574590	150574562	150574590	-	17	0	AGO1,AGO1-4,AGO2	0	0	0	1	0	0	0	-0.0307	1.698	0
MIMAT0004954	hsa-miR-543	ENSG00000143384	MCL1	protein_coding	chr1	150574630	150574635	150574630	150574635	-	2	0	AGO2	1	0	0	0	0	0	0	-0.0327	0.993	1
MIMAT0004774	hsa-miR-501-3p	ENSG00000143384	MCL1	protein_coding	chr1	150575062	150575067	150575062	150575067	-	6	0	AGO1-4,AGO2	1	0	0	0	0	0	0	-0.0348	-0.282	9
MIMAT0002176	hsa-miR-485-3p	ENSG00000143384	MCL1	protein_coding	chr1	150575303	150575308	150575303	150575308	-	2	0	AGO1-4,AGO2	1	0	1	0	0	0	0	-0.0405	0.198	2
MIMAT0015037	hsa-miR-3163	ENSG00000143384	MCL1	protein_coding	chr1	150575501	150575529	150575501	150575529	-	1	1	AGO1	0	0	0	1	0	0	0	-0.0628	-0.428	0
MIMAT0002883	hsa-miR-514a-3p	ENSG00000143384	MCL1	protein_coding	chr1	150574621	150574626	150574621	150574626	-	9	0	AGO1-4,AGO2	1	0	0	0	0	0	0	-0.0745	2.323	8
MIMAT0002172	hsa-miR-376b-3p	ENSG00000143384	MCL1	protein_coding	chr1	150576926	150576931	150576926	150576931	-	32	0	AGO1,AGO1-4,AGO2	1	0	0	0	0	0	0	-0.0899	0.909	0
MIMAT0015037	hsa-miR-3163	ENSG00000143384	MCL1	protein_coding	chr1	150576829	150576857	150576829	150576857	-	4	0	AGO1,AGO2	0	0	0	1	0	0	0	-0.1126	0.292	0
MIMAT0002171	hsa-miR-410-3p	ENSG00000143384	MCL1	protein_coding	chr1	150575816	150575821	150575816	150575821	-	12	0	AGO1,AGO1-4,AGO2	1	0	0	0	0	0	0	-0.1498	0.294	4
MIMAT0000439	hsa-miR-153-3p	ENSG00000143384	MCL1	protein_coding	chr1	150577310	150577315	150577310	150577315	-	9	0	AGO1,AGO1-4,AGO2	1	0	1	0	0	0	0	-0.1569	1.766	4
MIMAT0000259	hsa-miR-182-5p	ENSG00000143384	MCL1	protein_coding	chr1	150575083	150575088	150575083	150575088	-	4	0	AGO1-4,AGO2	1	0	0	0	0	0	0	-0.1756	0.917	14
MIMAT0003881	hsa-miR-668-3p	ENSG00000143384	MCL1	protein_coding	chr1	150576958	150576963	150576958	150576963	-	22	0	AGO1,AGO1-4,AGO2	1	0	1	0	0	0	0	-0.1798	0.265	2
MIMAT0004947	hsa-miR-885-5p	ENSG00000143384	MCL1	protein_coding	chr1	150576286	150576291	150576286	150576291	-	6	0	AGO1-4,AGO2	1	0	0	0	0	0	0	-0.2073	0.457	8
MIMAT0000707	hsa-miR-363-3p	ENSG00000143384	MCL1	protein_coding	chr1	150577356	150577363	150577356	150577374	-	21	0	AGO1,AGO1-4,AGO2	0	0	0	0	2	0	0	-0.2927	1.607	7
MIMAT0015008	hsa-miR-3140-3p	ENSG00000143384	MCL1	protein_coding	chr1	150577252	150577257	150577251	150577279	-	3	0	AGO1-4,AGO2	0	0	1	1	0	0	0	-0.3055	0.367	1
MIMAT0002877	hsa-miR-513a-5p	ENSG00000143384	MCL1	protein_coding	chr1	150575638	150575643	150575638	150575643	-	11	0	AGO1-4,AGO2	1	0	0	0	0	0	0	-0.3503	-0.106	3
MIMAT0002817	hsa-miR-495-3p	ENSG00000143384	MCL1	protein_coding	chr1	150576540	150576545	150576539	150576567	-	5	1	AGO1,AGO1-4,AGO2	1	0	0	1	0	0	0	-0.4304	0.782	1
MIMAT0002176	hsa-miR-485-3p	ENSG00000143384	MCL1	protein_coding	chr1	150575012	150575017	150575012	150575017	-	1	0	AGO2	1	0	1	0	0	0	0	-0.5623	0.339	2
MIMAT0002807	hsa-miR-491-5p	ENSG00000143384	MCL1	protein_coding	chr1	150575711	150575717	150575711	150575717	-	4	0	AGO1,AGO1-4,AGO2	1	0	1	0	0	0	0	-0.5909	-0.308	3
MIMAT0022705	hsa-miR-539-3p	ENSG00000143384	MCL1	protein_coding	chr1	150575303	150575308	150575303	150575308	-	2	0	AGO1-4,AGO2	0	0	1	0	0	0	0	-0.784	0.198	1
MIMAT0000102	hsa-miR-105-5p	ENSG00000143384	MCL1	protein_coding	chr1	150576246	150576251	150576245	150576269	-	7	0	AGO1,AGO2	1	1	1	0	0	0	0	-1.033	0.643	3
MIMAT0003247	hsa-miR-582-5p	ENSG00000143384	MCL1	protein_coding	chr1	150576906	150576911	150576905	150576933	-	38	0	AGO1,AGO1-4,AGO2	1	0	0	1	0	0	0	-1.6087	1.209	10
MIMAT0000772	hsa-miR-345-5p	ENSG00000087074	PPP1R15A	protein_coding	chr19	48874609	48874633	48874609	48874633	+	1	0	AGO2	0	1	0	0	0	0	0	1.5454	-0.074	5
MIMAT0000772	hsa-miR-345-5p	ENSG00000087074	PPP1R15A	protein_coding	chr19	48874685	48874705	48874685	48874705	+	0	1	NA	0	1	0	0	0	0	0	1.375	0.065	5
MIMAT0002855	hsa-miR-520d-5p	ENSG00000087074	PPP1R15A	protein_coding	chr19	48876053	48876058	48876053	48876058	+	5	0	AGO1-4,AGO2	1	0	0	0	0	0	0	1.3353	0.812	2
MIMAT0002849	hsa-miR-524-5p	ENSG00000087074	PPP1R15A	protein_coding	chr19	48876053	48876058	48876053	48876058	+	5	0	AGO1-4,AGO2	1	0	0	0	0	0	0	1.2594	0.812	3
MIMAT0000687	hsa-miR-299-3p	ENSG00000087074	PPP1R15A	protein_coding	chr19	48874621	48874641	48874621	48874641	+	1	0	AGO2	0	1	0	0	0	0	0	1.2217	-0.617	1
MIMAT0004987	hsa-miR-944	ENSG00000087074	PPP1R15A	protein_coding	chr19	48875991	48875996	48875991	48875996	+	2	0	AGO1,AGO1-4	1	0	0	0	0	0	0	1.0643	0.65	2
MIMAT0018183	hsa-miR-3909	ENSG00000087074	PPP1R15A	protein_coding	chr19	48874259	48874281	48874259	48874281	+	2	0	AGO1-4	0	1	0	0	0	0	0	0.9756	1.137	1
MIMAT0004692	hsa-miR-340-5p	ENSG00000087074	PPP1R15A	protein_coding	chr19	48876027	48876032	48876027	48876032	+	5	0	AGO1,AGO1-4	1	0	0	0	0	0	0	0.4372	0.594	0
MIMAT0004614	hsa-miR-193a-5p	ENSG00000087074	PPP1R15A	protein_coding	chr19	48874616	48874637	48874616	48874637	+	1	0	AGO2	0	1	0	0	0	0	0	0.2849	-0.156	6
MIMAT0002171	hsa-miR-410-3p	ENSG00000087074	PPP1R15A	protein_coding	chr19	48876028	48876033	48876028	48876033	+	5	0	AGO1,AGO1-4	1	0	0	0	0	0	0	-0.0227	0.25	2
MIMAT0000242	hsa-miR-129-5p	ENSG00000116741	RGS2	protein_coding	chr1	192810222	192810244	192810222	192810244	+	0	0	NA	0	1	0	0	0	0	0	2.0455	1.625	6
MIMAT0000450	hsa-miR-149-5p	ENSG00000116741	RGS2	protein_coding	chr1	192811751	192811756	192811751	192811756	+	1	0	AGO2	1	0	0	0	0	0	0	1.7531	0.565	4
MIMAT0018992	hsa-miR-4465	ENSG00000116741	RGS2	protein_coding	chr1	192810390	192810412	192810390	192810412	+	2	0	AGO1-4,AGO2	0	1	0	0	0	0	0	1.661	3.866	1
MIMAT0000436	hsa-miR-144-3p	ENSG00000116741	RGS2	protein_coding	chr1	192812076	192812081	192812076	192812081	+	0	0	NA	1	0	1	0	0	0	0	1.5759	0.45	2
MIMAT0000099	hsa-miR-101-3p	ENSG00000116741	RGS2	protein_coding	chr1	192812075	192812081	192812054	192812082	+	0	3	NA	1	0	1	1	1	0	0	1.4449	0.619	6
MIMAT0002853	hsa-miR-519d-3p	ENSG00000116741	RGS2	protein_coding	chr1	192812218	192812223	192812201	192812224	+	8	0	AGO1-4,AGO2	1	0	0	0	1	0	0	1.4212	0.717	2
MIMAT0002834	hsa-miR-520a-3p	ENSG00000116741	RGS2	protein_coding	chr1	192811905	192811912	192811905	192811912	+	3	0	AGO1-4,AGO2	1	0	0	0	0	0	0	1.4126	0.678	2
MIMAT0000102	hsa-miR-105-5p	ENSG00000116741	RGS2	protein_coding	chr1	192810388	192810411	192810388	192810411	+	2	0	AGO1-4,AGO2	0	1	0	0	0	0	0	1.3966	3.699	4
MIMAT0000069	hsa-miR-16-5p	ENSG00000116741	RGS2	protein_coding	chr1	192810399	192810421	192810399	192810421	+	2	0	AGO1-4,AGO2	0	1	0	0	0	0	0	1.3836	3.84	10
MIMAT0000259	hsa-miR-182-5p	ENSG00000116741	RGS2	protein_coding	chr1	192812190	192812195	192812175	192812196	+	53	0	AGO1-4,AGO2	1	0	0	0	1	1	0	1.3825	1.993	15
MIMAT0005796	hsa-miR-1271-5p	ENSG00000116741	RGS2	protein_coding	chr1	192812189	192812195	192812168	192812196	+	53	0	AGO1-4,AGO2	1	0	1	1	1	1	1	1.3315	2.09	3
MIMAT0015008	hsa-miR-3140-3p	ENSG00000116741	RGS2	protein_coding	chr1	192811074	192811089	192811061	192811102	+	1	0	AGO2	0	0	0	2	0	0	0	1.235	2.918	1
MIMAT0001536	hsa-miR-429	ENSG00000116741	RGS2	protein_coding	chr1	192812041	192812048	192812041	192812048	+	1	0	AGO2	1	0	0	0	0	0	0	1.2221	0.286	14
MIMAT0018109	hsa-miR-3681-3p	ENSG00000116741	RGS2	protein_coding	chr1	192811654	192811659	192811654	192811659	+	1	0	AGO2	0	0	1	0	0	0	0	1.1951	0.418	2
MIMAT0000424	hsa-miR-128-3p	ENSG00000116741	RGS2	protein_coding	chr1	192811795	192811802	192811775	192811803	+	2	0	AGO2	1	0	0	1	1	0	0	1.1939	0.042	10
MIMAT0019828	hsa-miR-3529-5p	ENSG00000116741	RGS2	protein_coding	chr1	192810199	192810218	192810199	192810218	+	4	0	AGO2	0	1	0	0	0	0	0	1.1899	2.209	1
MIMAT0015008	hsa-miR-3140-3p	ENSG00000116741	RGS2	protein_coding	chr1	192811881	192811909	192811881	192811909	+	3	0	AGO1-4,AGO2	0	0	0	1	0	0	0	1.1873	0.05	1
MIMAT0000077	hsa-miR-22-3p	ENSG00000116741	RGS2	protein_coding	chr1	192812210	192812216	192812189	192812217	+	41	0	AGO1-4,AGO2	1	0	1	1	1	0	1	1.1807	3.246	3
MIMAT0015008	hsa-miR-3140-3p	ENSG00000116741	RGS2	protein_coding	chr1	192811831	192811859	192811831	192811859	+	0	0	NA	0	0	0	1	0	0	0	1.1396	0.152	1
MIMAT0001341	hsa-miR-424-5p	ENSG00000116741	RGS2	protein_coding	chr1	192810397	192810421	192810397	192810421	+	2	0	AGO1-4,AGO2	0	1	0	0	0	0	0	1.123	3.941	7
MIMAT0002867	hsa-miR-520h	ENSG00000116741	RGS2	protein_coding	chr1	192812218	192812224	192812218	192812224	+	1	0	AGO1-4	1	0	0	0	0	0	0	1.1152	1.018	2
MIMAT0000436	hsa-miR-144-3p	ENSG00000116741	RGS2	protein_coding	chr1	192811890	192811896	192811879	192811897	+	2	0	AGO2	1	0	1	0	1	0	0	1.1146	0.388	2
MIMAT0002858	hsa-miR-520g-3p	ENSG00000116741	RGS2	protein_coding	chr1	192812218	192812224	192812218	192812224	+	1	0	AGO1-4	1	0	0	0	0	0	0	1.064	1.018	2
MIMAT0000095	hsa-miR-96-5p	ENSG00000116741	RGS2	protein_coding	chr1	192812189	192812195	192812168	192812196	+	53	0	AGO1-4,AGO2	1	0	1	1	1	1	1	1.0637	2.09	16
MIMAT0000417	hsa-miR-15b-5p	ENSG00000116741	RGS2	protein_coding	chr1	192810399	192810421	192810399	192810421	+	2	0	AGO1-4,AGO2	0	1	0	0	0	0	0	1.0443	3.84	13
MIMAT0000068	hsa-miR-15a-5p	ENSG00000116741	RGS2	protein_coding	chr1	192810399	192810421	192810399	192810421	+	2	0	AGO1-4,AGO2	0	1	0	0	0	0	0	1.0399	3.84	9
MIMAT0004810	hsa-miR-629-5p	ENSG00000116741	RGS2	protein_coding	chr1	192810212	192810230	192810212	192810230	+	2	0	AGO2	0	1	0	0	0	0	0	1.0221	1.769	8
MIMAT0000456	hsa-miR-186-5p	ENSG00000116741	RGS2	protein_coding	chr1	192811632	192811638	192811632	192811638	+	1	0	AGO2	1	0	0	0	0	0	0	1.0026	0.53	9
MIMAT0000687	hsa-miR-299-3p	ENSG00000116741	RGS2	protein_coding	chr1	192811986	192811991	192811971	192811992	+	1	0	AGO1-4	1	0	0	0	1	0	0	0.9922	0.584	4
MIMAT0000093	hsa-miR-93-5p	ENSG00000116741	RGS2	protein_coding	chr1	192812218	192812223	192812201	192812224	+	8	0	AGO1-4,AGO2	1	0	0	0	1	0	0	0.9745	0.717	9
MIMAT0000459	hsa-miR-193a-3p	ENSG00000116741	RGS2	protein_coding	chr1	192811752	192811757	192811737	192811758	+	2	0	AGO1-4,AGO2	1	0	0	0	1	0	0	0.9467	0.362	5
MIMAT0019864	hsa-miR-3064-5p	ENSG00000116741	RGS2	protein_coding	chr1	192810408	192810427	192810408	192810427	+	2	0	AGO1-4,AGO2	0	1	0	0	0	0	0	0.9048	3.32	1
MIMAT0000099	hsa-miR-101-3p	ENSG00000116741	RGS2	protein_coding	chr1	192811891	192811896	192811869	192811897	+	2	0	AGO2	1	0	1	1	0	0	0	0.8292	0.152	6
MIMAT0004985	hsa-miR-942-5p	ENSG00000116741	RGS2	protein_coding	chr1	192811768	192811773	192811768	192811773	+	1	0	AGO2	1	0	0	0	0	0	0	0.7994	0.379	9
MIMAT0005800	hsa-miR-1298-5p	ENSG00000116741	RGS2	protein_coding	chr1	192812147	192812152	192812147	192812152	+	28	0	AGO1-4,AGO2	1	0	0	0	0	0	0	0.7959	0.629	0
MIMAT0002819	hsa-miR-193b-3p	ENSG00000116741	RGS2	protein_coding	chr1	192811752	192811757	192811737	192811758	+	2	0	AGO1-4,AGO2	1	0	0	0	1	0	0	0.7727	0.362	9
MIMAT0000084	hsa-miR-27a-3p	ENSG00000116741	RGS2	protein_coding	chr1	192811654	192811660	192811641	192811661	+	1	1	AGO2	1	0	0	0	1	0	0	0.7468	0.455	3
MIMAT0000419	hsa-miR-27b-3p	ENSG00000116741	RGS2	protein_coding	chr1	192811654	192811660	192811641	192811661	+	1	1	AGO2	1	0	0	0	1	0	0	0.7468	0.455	6
MIMAT0003244	hsa-miR-579-3p	ENSG00000116741	RGS2	protein_coding	chr1	192812130	192812135	192812130	192812135	+	5	0	AGO2	1	0	0	0	0	0	0	0.7391	0.074	3
MIMAT0018109	hsa-miR-3681-3p	ENSG00000116741	RGS2	protein_coding	chr1	192811796	192811802	192811796	192811802	+	0	0	NA	0	0	1	0	0	0	0	0.7273	0.043	2
MIMAT0000242	hsa-miR-129-5p	ENSG00000116741	RGS2	protein_coding	chr1	192812193	192812198	192812193	192812198	+	25	0	AGO1-4,AGO2	1	0	0	0	0	0	0	0.7061	1.922	6
MIMAT0022844	hsa-miR-216a-3p	ENSG00000116741	RGS2	protein_coding	chr1	192811796	192811802	192811796	192811802	+	0	0	NA	0	0	1	0	0	0	0	0.6674	0.043	1
MIMAT0000280	hsa-miR-223-3p	ENSG00000116741	RGS2	protein_coding	chr1	192811673	192811678	192811671	192811678	+	0	0	NA	1	0	1	0	0	0	0	0.6607	2.405	2
MIMAT0018183	hsa-miR-3909	ENSG00000116741	RGS2	protein_coding	chr1	192811621	192811626	192811599	192811627	+	1	0	AGO2	0	0	1	1	0	0	0	0.6563	1.499	3
MIMAT0002877	hsa-miR-513a-5p	ENSG00000116741	RGS2	protein_coding	chr1	192811655	192811660	192811655	192811660	+	1	0	AGO2	1	0	0	0	0	0	0	0.6111	0.444	5
MIMAT0022844	hsa-miR-216a-3p	ENSG00000116741	RGS2	protein_coding	chr1	192811654	192811659	192811654	192811659	+	1	0	AGO2	0	0	1	0	0	0	0	0.5654	0.418	1
MIMAT0000426	hsa-miR-132-3p	ENSG00000116741	RGS2	protein_coding	chr1	192812077	192812082	192812077	192812082	+	0	0	NA	1	0	0	0	0	0	0	0.5576	0.502	2
MIMAT0000460	hsa-miR-194-5p	ENSG00000116741	RGS2	protein_coding	chr1	192811981	192811986	192811966	192811987	+	1	0	AGO1-4	1	0	0	0	1	0	0	0.5122	1.008	15
MIMAT0004784	hsa-miR-455-3p	ENSG00000116741	RGS2	protein_coding	chr1	192811652	192811657	192811652	192811657	+	1	0	AGO2	1	0	0	0	0	0	0	0.5099	1.033	10
MIMAT0003311	hsa-miR-641	ENSG00000116741	RGS2	protein_coding	chr1	192812201	192812206	192812201	192812206	+	8	0	AGO1-4,AGO2	1	0	0	0	0	0	0	0.4878	2	1
MIMAT0004597	hsa-miR-140-3p	ENSG00000116741	RGS2	protein_coding	chr1	192810378	192810399	192810378	192810399	+	2	0	AGO1-4,AGO2	0	1	0	0	0	0	0	0.367	3.743	3
MIMAT0000075	hsa-miR-20a-5p	ENSG00000116741	RGS2	protein_coding	chr1	192812218	192812223	192812202	192812224	+	8	0	AGO1-4,AGO2	1	0	0	0	1	0	0	0.3415	0.717	11
MIMAT0001413	hsa-miR-20b-5p	ENSG00000116741	RGS2	protein_coding	chr1	192812218	192812223	192812202	192812224	+	8	0	AGO1-4,AGO2	1	0	0	0	1	0	0	0.3415	0.717	3
MIMAT0002824	hsa-miR-498	ENSG00000116741	RGS2	protein_coding	chr1	192812204	192812209	192812204	192812209	+	7	0	AGO1-4,AGO2	1	0	0	0	0	0	0	0.3398	1.182	2
MIMAT0000269	hsa-miR-212-3p	ENSG00000116741	RGS2	protein_coding	chr1	192812077	192812082	192812077	192812082	+	0	0	NA	1	0	0	0	0	0	0	0.3345	0.502	2
MIMAT0004953	hsa-miR-873-5p	ENSG00000116741	RGS2	protein_coding	chr1	192811639	192811644	192811639	192811644	+	1	0	AGO2	1	0	0	0	0	0	0	0.3151	0.248	0
MIMAT0000261	hsa-miR-183-5p	ENSG00000116741	RGS2	protein_coding	chr1	192811663	192811668	192811663	192811668	+	1	0	AGO2	1	0	0	0	0	0	0	0.2994	0.538	15
MIMAT0000680	hsa-miR-106b-5p	ENSG00000116741	RGS2	protein_coding	chr1	192812218	192812223	192812204	192812224	+	7	0	AGO1-4,AGO2	1	0	0	0	1	0	0	0.2718	0.717	9
MIMAT0019062	hsa-miR-4524a-5p	ENSG00000116741	RGS2	protein_coding	chr1	192810400	192810422	192810400	192810422	+	2	0	AGO1-4,AGO2	0	1	0	0	0	0	0	0.2698	3.834	2
MIMAT0000274	hsa-miR-217	ENSG00000116741	RGS2	protein_coding	chr1	192812172	192812177	192812172	192812177	+	51	0	AGO1-4,AGO2	1	0	0	0	0	0	0	0.2609	0.275	1
MIMAT0000269	hsa-miR-212-3p	ENSG00000116741	RGS2	protein_coding	chr1	192811892	192811897	192811892	192811897	+	2	0	AGO2	1	0	0	0	0	0	0	0.2605	0.016	2
MIMAT0000280	hsa-miR-223-3p	ENSG00000116741	RGS2	protein_coding	chr1	192811758	192811764	192811744	192811765	+	1	0	AGO2	1	0	1	0	1	0	0	0.2594	-0.536	2
MIMAT0000426	hsa-miR-132-3p	ENSG00000116741	RGS2	protein_coding	chr1	192811892	192811897	192811892	192811897	+	2	0	AGO2	1	0	0	0	0	0	0	0.2218	0.016	2
MIMAT0000424	hsa-miR-128-3p	ENSG00000116741	RGS2	protein_coding	chr1	192811654	192811659	192811632	192811660	+	1	1	AGO2	1	0	0	1	0	0	0	0.1638	0.418	10
MIMAT0000730	hsa-miR-377-3p	ENSG00000116741	RGS2	protein_coding	chr1	192812136	192812142	192812122	192812143	+	8	0	AGO1-4,AGO2	1	0	0	0	1	0	0	0.1601	0.828	2
MIMAT0000266	hsa-miR-205-5p	ENSG00000116741	RGS2	protein_coding	chr1	192812206	192812211	192812206	192812211	+	5	0	AGO1-4,AGO2	1	0	0	0	0	0	0	0.0841	1.896	4
MIMAT0002824	hsa-miR-498	ENSG00000116741	RGS2	protein_coding	chr1	192811679	192811684	192811679	192811684	+	0	0	NA	1	0	0	0	0	0	0	0.0763	1.366	2
MIMAT0000070	hsa-miR-17-5p	ENSG00000116741	RGS2	protein_coding	chr1	192812218	192812223	192812202	192812224	+	8	0	AGO1-4,AGO2	1	0	0	0	1	0	0	0.0551	0.717	15
MIMAT0000103	hsa-miR-106a-5p	ENSG00000116741	RGS2	protein_coding	chr1	192812218	192812223	192812202	192812224	+	8	0	AGO1-4,AGO2	1	0	0	0	1	0	0	0.0551	0.717	6
MIMAT0003339	hsa-miR-421	ENSG00000116741	RGS2	protein_coding	chr1	192812162	192812167	192812162	192812167	+	52	0	AGO1-4,AGO2	1	0	0	0	0	0	0	0.0371	1.124	6
MIMAT0000440	hsa-miR-191-5p	ENSG00000116741	RGS2	protein_coding	chr1	192812179	192812184	192812179	192812184	+	53	0	AGO1-4,AGO2	1	0	0	0	0	0	0	-0.3675	0.213	13

## Sheet: MAFF
miRNA	hubgene
hsa-miR-4739	MAFF
hsa-miR-708-5p	MAFF
hsa-miR-3918	MAFF
hsa-miR-454-3p	MAFF
hsa-miR-296-3p	MAFF
hsa-miR-3150a-3p	MAFF
hsa-miR-5194	MAFF
hsa-miR-3150b-3p	MAFF
hsa-miR-4295	MAFF
hsa-miR-27a-3p	MAFF

## Sheet: MCL1
miRNA	hubgene
hsa-miR-130a-3p	MCL1
hsa-miR-577	MCL1
hsa-miR-493-5p	MCL1
hsa-miR-488-3p	MCL1
hsa-miR-1252-5p	MCL1
hsa-miR-6509-3p	MCL1
hsa-miR-320b	MCL1
hsa-miR-320c	MCL1
hsa-miR-219a-2-3p	MCL1
hsa-miR-320d	MCL1

## Sheet: PPP1R15A
miRNA	hubgene
hsa-miR-345-5p	PPP1R15A
hsa-miR-520d-5p	PPP1R15A
hsa-miR-524-5p	PPP1R15A
hsa-miR-299-3p	PPP1R15A
hsa-miR-944	PPP1R15A
hsa-miR-3909	PPP1R15A
hsa-miR-340-5p	PPP1R15A
hsa-miR-193a-5p	PPP1R15A
hsa-miR-410-3p	PPP1R15A

## Sheet: RGS2
miRNA	hubgene
hsa-miR-129-5p	RGS2
hsa-miR-149-5p	RGS2
hsa-miR-4465	RGS2
hsa-miR-144-3p	RGS2
hsa-miR-101-3p	RGS2
hsa-miR-519d-3p	RGS2
hsa-miR-520a-3p	RGS2
hsa-miR-105-5p	RGS2
hsa-miR-16-5p	RGS2
hsa-miR-182-5p	RGS2

## Sheet: Sheet1
miRNAname	geneName
hsa-miR-4739	MAFF
hsa-miR-708-5p	MAFF
hsa-miR-3918	MAFF
hsa-miR-454-3p	MAFF
hsa-miR-296-3p	MAFF
hsa-miR-3150a-3p	MAFF
hsa-miR-5194	MAFF
hsa-miR-3150b-3p	MAFF
hsa-miR-4295	MAFF
hsa-miR-27a-3p	MAFF
hsa-miR-27b-3p	MAFF
hsa-miR-152-3p	MAFF
hsa-miR-1296-5p	MAFF
hsa-miR-124-3p	MAFF
hsa-miR-1914-3p	MAFF
hsa-miR-301a-3p	MAFF
hsa-miR-301b-3p	MAFF
hsa-miR-214-3p	MAFF
hsa-miR-491-5p	MAFF
hsa-miR-148b-3p	MAFF
hsa-miR-3126-5p	MAFF
hsa-miR-378g	MAFF
hsa-miR-423-5p	MAFF
hsa-miR-148a-3p	MAFF
hsa-miR-224-5p	MAFF
hsa-miR-19a-3p	MAFF
hsa-miR-651-5p	MAFF
hsa-miR-96-5p	MAFF
hsa-miR-1271-5p	MAFF
hsa-miR-3064-5p	MAFF
hsa-miR-449a	MAFF
hsa-miR-449b-5p	MAFF
hsa-miR-19b-3p	MAFF
hsa-miR-130a-3p	MAFF
hsa-miR-1343-3p	MAFF
hsa-miR-3619-5p	MAFF
hsa-miR-520d-5p	MAFF
hsa-miR-28-5p	MAFF
hsa-miR-4761-3p	MAFF
hsa-miR-130b-3p	MAFF
hsa-miR-7-5p	MAFF
hsa-miR-513a-5p	MAFF
hsa-miR-6504-5p	MAFF
hsa-miR-2278	MAFF
hsa-miR-9-5p	MAFF
hsa-miR-524-5p	MAFF
hsa-miR-873-5p	MAFF
hsa-miR-3666	MAFF
hsa-miR-5010-5p	MAFF
hsa-miR-506-3p	MAFF
hsa-miR-149-5p	MAFF
hsa-miR-625-5p	MAFF
hsa-miR-182-5p	MAFF
hsa-miR-187-3p	MAFF
hsa-miR-1286	MAFF
hsa-miR-541-3p	MAFF
hsa-miR-629-5p	MAFF
hsa-miR-184	MAFF
hsa-miR-522-3p	MAFF
hsa-miR-10a-5p	MAFF
hsa-miR-128-3p	MAFF
hsa-miR-654-5p	MAFF
hsa-miR-425-5p	MAFF
hsa-miR-10b-5p	MAFF
hsa-miR-335-5p	MAFF
hsa-miR-641	MAFF
hsa-miR-296-5p	MAFF
hsa-miR-130a-3p	MCL1
hsa-miR-577	MCL1
hsa-miR-493-5p	MCL1
hsa-miR-488-3p	MCL1
hsa-miR-1252-5p	MCL1
hsa-miR-6509-3p	MCL1
hsa-miR-320b	MCL1
hsa-miR-320c	MCL1
hsa-miR-219a-2-3p	MCL1
hsa-miR-320d	MCL1
hsa-miR-320a	MCL1
hsa-miR-491-5p	MCL1
hsa-miR-582-5p	MCL1
hsa-miR-1185-5p	MCL1
hsa-miR-4429	MCL1
hsa-miR-134-5p	MCL1
hsa-miR-191-5p	MCL1
hsa-miR-26b-5p	MCL1
hsa-miR-1277-5p	MCL1
hsa-miR-27b-3p	MCL1
hsa-miR-136-5p	MCL1
hsa-miR-1297	MCL1
hsa-miR-96-5p	MCL1
hsa-miR-4761-5p	MCL1
hsa-miR-432-5p	MCL1
hsa-miR-1323	MCL1
hsa-miR-183-5p	MCL1
hsa-miR-374a-3p	MCL1
hsa-miR-302a-3p	MCL1
hsa-miR-367-3p	MCL1
hsa-miR-5590-3p	MCL1
hsa-miR-302b-3p	MCL1
hsa-miR-526b-3p	MCL1
hsa-miR-624-3p	MCL1
hsa-miR-32-5p	MCL1
hsa-miR-448	MCL1
hsa-miR-552-3p	MCL1
hsa-miR-760	MCL1
hsa-miR-520b	MCL1
hsa-miR-3150a-3p	MCL1
hsa-miR-4662a-5p	MCL1
hsa-miR-19b-3p	MCL1
hsa-miR-153-3p	MCL1
hsa-miR-369-3p	MCL1
hsa-miR-670-5p	MCL1
hsa-miR-144-3p	MCL1
hsa-miR-875-5p	MCL1
hsa-miR-26a-5p	MCL1
hsa-miR-410-3p	MCL1
hsa-miR-4319	MCL1
hsa-miR-629-5p	MCL1
hsa-miR-19a-3p	MCL1
hsa-miR-4756-5p	MCL1
hsa-miR-580-3p	MCL1
hsa-miR-208b-3p	MCL1
hsa-miR-802	MCL1
hsa-miR-302c-3p	MCL1
hsa-miR-129-2-3p	MCL1
hsa-miR-25-3p	MCL1
hsa-miR-3614-5p	MCL1
hsa-miR-520c-3p	MCL1
hsa-miR-494-3p	MCL1
hsa-miR-519c-3p	MCL1
hsa-miR-217	MCL1
hsa-miR-545-5p	MCL1
hsa-miR-381-3p	MCL1
hsa-miR-302e	MCL1
hsa-miR-193b-3p	MCL1
hsa-miR-502-3p	MCL1
hsa-miR-18a-5p	MCL1
hsa-miR-224-5p	MCL1
hsa-miR-505-3p	MCL1
hsa-miR-532-3p	MCL1
hsa-miR-520f-3p	MCL1
hsa-miR-141-3p	MCL1
hsa-miR-302d-3p	MCL1
hsa-miR-27a-3p	MCL1
hsa-miR-501-3p	MCL1
hsa-miR-204-5p	MCL1
hsa-miR-524-5p	MCL1
hsa-miR-3140-3p	MCL1
hsa-miR-149-5p	MCL1
hsa-miR-519d-3p	MCL1
hsa-miR-361-5p	MCL1
hsa-miR-200b-3p	MCL1
hsa-miR-1277-3p	MCL1
hsa-miR-186-5p	MCL1
hsa-miR-485-5p	MCL1
hsa-miR-345-3p	MCL1
hsa-miR-192-5p	MCL1
hsa-miR-215-5p	MCL1
hsa-miR-211-5p	MCL1
hsa-miR-137	MCL1
hsa-miR-496	MCL1
hsa-miR-1276	MCL1
hsa-miR-370-3p	MCL1
hsa-miR-4766-5p	MCL1
hsa-miR-29c-3p	MCL1
hsa-miR-29b-3p	MCL1
hsa-miR-128-3p	MCL1
hsa-miR-514a-3p	MCL1
hsa-miR-520a-3p	MCL1
hsa-miR-101-3p	MCL1
hsa-miR-29a-3p	MCL1
hsa-miR-2115-3p	MCL1
hsa-miR-1251-5p	MCL1
hsa-miR-556-3p	MCL1
hsa-miR-300	MCL1
hsa-miR-208a-3p	MCL1
hsa-miR-339-3p	MCL1
hsa-miR-877-5p	MCL1
hsa-miR-654-3p	MCL1
hsa-miR-105-5p	MCL1
hsa-miR-421	MCL1
hsa-miR-548o-3p	MCL1
hsa-miR-194-5p	MCL1
hsa-miR-200a-3p	MCL1
hsa-miR-513c-5p	MCL1
hsa-miR-3163	MCL1
hsa-miR-668-3p	MCL1
hsa-miR-3679-5p	MCL1
hsa-miR-371a-3p	MCL1
hsa-miR-324-3p	MCL1
hsa-miR-641	MCL1
hsa-miR-888-5p	MCL1
hsa-miR-876-5p	MCL1
hsa-miR-495-3p	MCL1
hsa-miR-193a-3p	MCL1
hsa-miR-133a-3p	MCL1
hsa-miR-1278	MCL1
hsa-miR-1321	MCL1
hsa-miR-299-5p	MCL1
hsa-miR-4739	MCL1
hsa-miR-340-5p	MCL1
hsa-miR-372-3p	MCL1
hsa-miR-142-5p	MCL1
hsa-miR-576-5p	MCL1
hsa-miR-1908-5p	MCL1
hsa-miR-20a-5p	MCL1
hsa-miR-23a-3p	MCL1
hsa-miR-346	MCL1
hsa-miR-373-3p	MCL1
hsa-miR-151a-3p	MCL1
hsa-miR-147a	MCL1
hsa-miR-92a-3p	MCL1
hsa-miR-885-5p	MCL1
hsa-miR-362-5p	MCL1
hsa-miR-520d-3p	MCL1
hsa-miR-498	MCL1
hsa-miR-133b	MCL1
hsa-miR-499a-5p	MCL1
hsa-miR-660-5p	MCL1
hsa-miR-376c-3p	MCL1
hsa-miR-449a	MCL1
hsa-miR-200c-3p	MCL1
hsa-miR-520g-3p	MCL1
hsa-miR-539-3p	MCL1
hsa-miR-338-3p	MCL1
hsa-miR-522-3p	MCL1
hsa-miR-20b-5p	MCL1
hsa-miR-520e	MCL1
hsa-miR-512-3p	MCL1
hsa-miR-873-5p	MCL1
hsa-miR-371a-5p	MCL1
hsa-miR-526a	MCL1
hsa-miR-520c-5p	MCL1
hsa-miR-518d-5p	MCL1
hsa-miR-374b-5p	MCL1
hsa-miR-361-3p	MCL1
hsa-miR-374a-5p	MCL1
hsa-miR-362-3p	MCL1
hsa-miR-17-5p	MCL1
hsa-miR-93-5p	MCL1
hsa-miR-106a-5p	MCL1
hsa-miR-510-5p	MCL1
hsa-miR-4465	MCL1
hsa-miR-34a-5p	MCL1
hsa-miR-382-5p	MCL1
hsa-miR-92b-3p	MCL1
hsa-miR-541-3p	MCL1
hsa-miR-106b-5p	MCL1
hsa-miR-513a-5p	MCL1
hsa-miR-4262	MCL1
hsa-miR-18b-5p	MCL1
hsa-miR-154-5p	MCL1
hsa-miR-329-3p	MCL1
hsa-miR-380-3p	MCL1
hsa-miR-519c-5p	MCL1
hsa-miR-519b-5p	MCL1
hsa-miR-449b-5p	MCL1
hsa-miR-296-5p	MCL1
hsa-miR-384	MCL1
hsa-miR-429	MCL1
hsa-miR-1224-5p	MCL1
hsa-miR-520h	MCL1
hsa-miR-181d-5p	MCL1
hsa-miR-152-3p	MCL1
hsa-miR-654-5p	MCL1
hsa-miR-1197	MCL1
hsa-miR-199a-3p	MCL1
hsa-miR-199b-3p	MCL1
hsa-miR-375	MCL1
hsa-miR-490-3p	MCL1
hsa-miR-520d-5p	MCL1
hsa-miR-942-5p	MCL1
hsa-miR-34c-5p	MCL1
hsa-miR-423-5p	MCL1
hsa-miR-323a-3p	MCL1
hsa-miR-143-3p	MCL1
hsa-miR-125a-5p	MCL1
hsa-miR-4701-5p	MCL1
hsa-miR-181b-5p	MCL1
hsa-miR-135a-5p	MCL1
hsa-miR-135b-5p	MCL1
hsa-miR-212-3p	MCL1
hsa-miR-489-3p	MCL1
hsa-miR-139-5p	MCL1
hsa-miR-1269a	MCL1
hsa-miR-28-3p	MCL1
hsa-miR-582-3p	MCL1
hsa-miR-181a-5p	MCL1
hsa-miR-452-5p	MCL1
hsa-miR-181c-5p	MCL1
hsa-miR-1913	MCL1
hsa-miR-150-5p	MCL1
hsa-miR-23b-3p	MCL1
hsa-miR-132-3p	MCL1
hsa-miR-628-5p	MCL1
hsa-miR-1271-5p	MCL1
hsa-miR-148a-3p	MCL1
hsa-miR-148b-3p	MCL1
hsa-miR-588	MCL1
hsa-miR-515-5p	MCL1
hsa-miR-125b-5p	MCL1
hsa-miR-663a	MCL1
hsa-miR-579-3p	MCL1
hsa-miR-214-3p	MCL1
hsa-miR-376a-3p	MCL1
hsa-miR-197-3p	MCL1
hsa-miR-545-3p	MCL1
hsa-miR-519a-3p	MCL1
hsa-miR-519b-3p	MCL1
hsa-miR-543	MCL1
hsa-miR-485-3p	MCL1
hsa-miR-376b-3p	MCL1
hsa-miR-182-5p	MCL1
hsa-miR-363-3p	MCL1
hsa-miR-345-5p	PPP1R15A
hsa-miR-520d-5p	PPP1R15A
hsa-miR-524-5p	PPP1R15A
hsa-miR-299-3p	PPP1R15A
hsa-miR-944	PPP1R15A
hsa-miR-3909	PPP1R15A
hsa-miR-340-5p	PPP1R15A
hsa-miR-193a-5p	PPP1R15A
hsa-miR-410-3p	PPP1R15A
hsa-miR-129-5p	RGS2
hsa-miR-149-5p	RGS2
hsa-miR-4465	RGS2
hsa-miR-144-3p	RGS2
hsa-miR-101-3p	RGS2
hsa-miR-519d-3p	RGS2
hsa-miR-520a-3p	RGS2
hsa-miR-105-5p	RGS2
hsa-miR-16-5p	RGS2
hsa-miR-182-5p	RGS2
hsa-miR-1271-5p	RGS2
hsa-miR-3140-3p	RGS2
hsa-miR-429	RGS2
hsa-miR-3681-3p	RGS2
hsa-miR-128-3p	RGS2
hsa-miR-3529-5p	RGS2
hsa-miR-22-3p	RGS2
hsa-miR-424-5p	RGS2
hsa-miR-520h	RGS2
hsa-miR-520g-3p	RGS2
hsa-miR-96-5p	RGS2
hsa-miR-15b-5p	RGS2
hsa-miR-15a-5p	RGS2
hsa-miR-629-5p	RGS2
hsa-miR-186-5p	RGS2
hsa-miR-299-3p	RGS2
hsa-miR-93-5p	RGS2
hsa-miR-193a-3p	RGS2
hsa-miR-3064-5p	RGS2
hsa-miR-942-5p	RGS2
hsa-miR-1298-5p	RGS2
hsa-miR-193b-3p	RGS2
hsa-miR-27a-3p	RGS2
hsa-miR-27b-3p	RGS2
hsa-miR-579-3p	RGS2
hsa-miR-216a-3p	RGS2
hsa-miR-223-3p	RGS2
hsa-miR-3909	RGS2
hsa-miR-513a-5p	RGS2
hsa-miR-132-3p	RGS2
hsa-miR-194-5p	RGS2
hsa-miR-455-3p	RGS2
hsa-miR-641	RGS2
hsa-miR-140-3p	RGS2
hsa-miR-20a-5p	RGS2
hsa-miR-20b-5p	RGS2
hsa-miR-498	RGS2
hsa-miR-212-3p	RGS2
hsa-miR-873-5p	RGS2
hsa-miR-183-5p	RGS2
hsa-miR-106b-5p	RGS2
hsa-miR-4524a-5p	RGS2
hsa-miR-217	RGS2
hsa-miR-377-3p	RGS2
hsa-miR-205-5p	RGS2
hsa-miR-17-5p	RGS2
hsa-miR-106a-5p	RGS2
hsa-miR-421	RGS2
hsa-miR-191-5p	RGS2
