# Supplementary material for: Identification of mitochondria-related genes associated with anesthetics in patients undergoing off-pump coronary artery bypass grafting surgery
Source: Front Surg. 2025 Jul 9;12:1515732. doi: 10.3389/fsurg.2025.1515732 (PMC12283725; doi:10.3389/fsurg.2025.1515732)
Supplement: Supplementary Table S5 — Differentially expressed TFs. [file Table5.xlsx]

## Sheet: Sheet1
TFs
RUNX1
TFAP2A
Ar
PAX5
CREB1
E2F1
ELK1
Gata1
GATA2
GATA3
Klf4
Foxa2
IRF1
MEF2A
MAX
NFYA
Gabpa
Nkx2-5
PPARG
ELK4
SP1
SPI1
SRF
ZNF143
USF1
YY1
ETS1
Myb
CEBPA
ZEB1
Mycn
NFKB1
TP53
TBP
ESR1
NR3C1
Hnf4a
Nkx3-1
STAT1
REST
CTCF
ESRRB
Sox2
STAT3
Zfx
Myc
FOXA1
Nfe2l2
EBF1
NFIC
EGR1
ESR2
Atoh1
BATF::JUN
Bcl6
BHLHE40
CDX2
CEBPB
Crx
DUX4
E2F4
E2F6
EGR2
ELF1
ERG
FLI1
FOS
FOSL1
FOSL2
FOXH1
Foxo1
Gata4
Gfi1b
HNF4G
Hoxc9
HSF1
JUN
JUN(var.2)
JUNB
JUND
JUND(var.2)
Klf1
MAFF
MAFK
MEF2C
MEIS1
Myod1
Myog
NFYB
Nkx2-5(var.2)
NR2C2
Nr5a2
NRF1
POU2F2
PRDM1
Rfx1
RFX5
RUNX2
Rxra
Sox3
Stat4
Stat5a::Stat5b
Stat6
Tcf12
TCF3
TCF7L2
TFAP2C
TP63
USF2
ZBTB33
ZNF263
Esrra
Atf1
Atf3
RUNX3
ZBTB7A
MYBL2
TEAD4
TFAP2A(var.2)
TFAP2B
TFAP2B(var.2)
TFAP2B(var.3)
TFAP2C(var.2)
CEBPD
NFE2
TP73
TFAP2A(var.3)
dl
cad
cnc::maf-S
ASCL1
BACH2
CTCFL
FOXK1
FOXK2
FOXP1
GATA6
GRHL2
HIF1A
KLF9
MITF
MXI1
NEUROD1
NR2F2
NR4A1
PBX2
PBX3
POU5F1
RBPJ
SIX2
SMAD4
SOX10
TEAD2
TFDP1
TWIST1
ZNF24
ZNF384
ARNT
ARNTL
ATF4
ATF7
BHLHE22
CEBPG
CREB3L1
CREM
CUX1
ELF3
EOMES
ETV1
ETV4
ETV6
FOXJ2
GATA1::TAL1
HMBOX1
HNF1B
HOXA9
HOXB13
IRF2
IRF4
KLF5
LEF1
LHX2
MAF::NFE2
MAFB
MAFG
MEF2B
MEIS2
MNT
NFE2L1
NFKB2
NR2F1
NR2F6
ONECUT1
OTX2
PROX1
RELA
SMAD2
SMAD3
SNAI2
SPIB
SREBF1
SREBF1(VAR.2)
STAT2
TBX21
TCF7
TEAD1
TFAP2C(VAR.3)
TFAP4
THAP1
XBP1
ABF2
ABI5
ABR1
Adof1
AGL15
AGL63
AIL7
NAC055
NAC058
NAC083
ANL2
AREB3
ARF2
AT1G01250
AT1G12630
At1g19000
At1g19210
At1g25550
AT1G28160
At1g36060
AT1G44830
AT1G47655
At1g49010
AT1G49560
DOF1.8
At1g68670
AT1G69570
TCP15
At1g72010
AT1G72740
At1g74840
AT1G76880
AT1G77200
At1g78700
At2g01060
At2g03500
AT2G20110
AT2G28810
At2g33710
AT2G40260
At2g45680
At3g04030
At3g09600
AT3G10113
At3g11280
At3g24120
At3g45610
AT3G52440
At4g01280
At4g16750
AT4G18450
At4g18890
At4g31060
At4g32800
At4g36780
AT4G37180
AT5G02460
At5g05790
At5g08330
At5g08520
At5g18450
At5g29000
AT5G45580
At5g47390
At5g52660
AT5G56840
AT5G61620
DOF5.6
AT5G66940
ATHB13
ATHB15
ATHB18
ATHB21
ATHB23
ATHB24
ATHB25
ATHB33
ATHB34
ATHB40
ATHB-5
ATHB53
ATHB-6
ATHB7
bHLH31
bHLH80
BIM1
BIM2
BPC1
bZIP16
bZIP28
bZIP3
bZIP44
bZIP48
bZIP50
bZIP52
bZIP53
CAMTA1
CBF1
CBF2
DREB1A
CBF4
CDF3
CEJ1
COG1
DAG2
DEAR3
DEAR5
DOF2.4
dof4.2
dof4.5
DREB19
EPR1
ERF10
ERF105
ERF11
ERF15
ERF2
ERF3
ERF38
ERF4
ERF5
ERF7
ERF8
ESE1
ESE3
FAR1
FUS3
GATA11
GATA19
GBF3
GBF6
GT2
GT3a
HAT2
HDG1
IDD4
IDD7
JKD
LCL1
LEP
LHY1
ATHB-51
MYB101
MYB119
MYB27
MYB33
MYB3R1
MYB3R4
MYB3R5
MYB56
MYB57
MYB65
MYB70
MYB73
MYB77
MYB81
MYB98
NAC043
OBP1
OBP3
OBP4
PLT3
RAP21
Rap210
RAP211
RAP212
RAP26
RAV1
RVE1
SGR5
SOL1
SPL1
SPL13
SPL14
SPL5
SPL9
STZ
SVP
TBP3
TCP20
TCP24
TCP3
TCP7
TCX2
TGA1
TGA10
TGA2
TGA3
TGA4
TGA5
TGA6
TGA9
TINY
TRP1
TRP2
WRKY14
WRKY15
WRKY18
WRKY20
WRKY21
WRKY22
WRKY24
WRKY25
WRKY27
WRKY28
WRKY29
WRKY3
WRKY33
WRKY45
WRKY50
WRKY55
WRKY65
WRKY7
WRKY70
WRKY71
WRKY75
WRKY8
SP2
ABD-B
ABF1
ABF3
AG
AP1
ARR14
ASCL2
AT5G58900
ATHB-7
ATHB-9
BATF3
BCL6B
BEAF-32
BHLHA15
BHLHE41
BLMP-1
CCA1
CEBP-1
CEBPE
CEH-28
CEH-48
CLOCK
CRF4
DAF-16
DFD
DMRT1
DREB1E
DREF
EBF2
EFL-1
EHF
ELF4
ELF5
ELK3
ERF
ERF039
ERF043
ETV2
ETV5
FHY3
FKH
FLC
FOS-1
FOXF1
FOXL2
FOXO3
GATA20
GCN4
GFI1
GLIS1
GLIS2
GMEB2
GRH
GT
HAT22
HB
HLF
HLH-1
HLH-30
HNF1A
HOXA13
HOXB4
HOXD13
HSF
HY5
IKZF1
IRF8
ISL1
KAN1
KLF12
KLF15
KLF16
KLF3
KLF6
KR
LFY
LIN-54
M1BP
MAF
MAZ
MEF2D
MGA
MLX
MYB118
MYB3
MZF1
NAC92
NEUROD2
NEUROG2
NFATC1
NFIA
NFIL3
NR2C1
NR5A1
NR6A1
ODSH
ONECUT2
OVOL2
PAN
PAX7
PBX1
PHA-4
PHO
PHOX2B
PIF1
PIF3
PIF4
PIF5
PITX1
PKNOX1
PLAG1
POU2F3
POU3F2
PRDM15
PTF1A
RAP1
RAP2-10
RAP2-6
RARA
RBPJL
REB1
REF6
RELB
RFX2
RFX3
RORC
RXRB
SCRT1
SCRT2
2024-09-03
SKN-1
SNPC-4
SOC1
SOX13
SOX17
SOX6
SP3
SP4
SPDEF
STAT5A
STAT5B
SU(HW)
TBX19
TBX3
TBX5
TCF21
TCF4
TEAD3
TFCP2
TFE3
TGIF1
THAP11
THRB
TRL
TWI
UNC-30
VEZF1
VFL
WRKY30
WRKY40
WT1
YY2
ZBTB18
ZBTB26
ZBTB6
ZEN
ZFP57
ZIC2
ZKSCAN1
ZNF135
ZNF136
ZNF140
ZNF281
ZNF282
ZNF317
ZNF382
ZNF460
ZNF528
ZNF682
ZNF684
ZNF75D
ZSCAN29
ERF027
ERF015
KUA1
ZHD1
ABF4
ANAC050
ANAC13
AT-GTL1
AT3G10030
AT5G47660
ATF2
BACH1
BATF
BZIP68
CLAMP
DPBF3
DREB1B
DREB1C
EBF3
ELT-2
ERF021
ERF035
ERF118
FOXA3
GBF2
GT-4
HAND2
HSFA6B
HSFB2A
HSFB2B
HSFC1
LBD18
MYF5
NAC017
NAC029
NAC062
NAC078
NFIB
NFYC
NKX2-2
NTL8
PHL12
PQM-1
PRDM4
RAP2-1
RVE7
SRM1
TCX3
ZBTB12
ZBTB14
ZFP42
ZIP-8
ZKSCAN5
ZNF148
ZNF16
ZNF341
ZNF449
ZNF652
PDX1
TBXT
FOXF2
RORA
SOX9
REL
Nkx3-2
Lhx3
Tfcp2l1
Nfatc2
BZR1
MYC2
SPL3
Creb3l2
Dux
FOXG1
Gmeb1
Twist2
Esrrg
GRHL1
HEY2
IRF9
LHX6
NFIX
NKX6-1
OLIG2
TBX20
TFEB
Vdr
ZBTB7B
Zic3
LMX1B
PHOX2A
PROP1
VSX2
Gli2
GLIS3
CUX2
HSF2
PAX3
POU2F1
POU3F1
TGIF2
TBR1
HEY1
Creb5
Foxj3
Rarb
Sox11
DLX1
Dlx2
HOXB5
HOXC10
ARR1
ERF109
TGA7
HES1
Nr1H4
RORB
ZSCAN4
PHL11
HHO6
ERF011
ERF038
ERF086
WRKY6
WRKY11
WRKY31
ATHB-23
PLT1
HHO3
HHO2
IRF3
IRF5
ARNT2
Dlx5
ETS2
GLI3
HOXB8
Msgn1
NR1D1
NR1D2
OSR1
OVOL1
PPARD
SNAI1
SP9
Tbx6
ZIC5
OSR2
Foxn1
ZIM3
ZNF257
ZNF343
ZNF675
ZNF707
ZNF8
ZNF816
ZNF85
ZNF93
Rfx6
ZNF189
ZNF331
ZNF417
ZNF549
ZNF680
ZNF708
ZNF768
E2FD
BHLH122
DREB1F
HSFA6A
GLYMA-06G314400
GLYMA-07G038400
GLYMA-08G357600
GLYMA-13G317000
EIL4
RIN
O11
BNC2
PATZ1
SATB1
SP5
THRA
TRPS1
ZBED2
ZFP14
ZNF214
ZNF320
ZNF354A
ZNF418
ZNF574
ZNF667
ZNF692
Gli1
Ikzf3
Nkx2-1
Npas4
Nr1H2
Prdm14
Prdm5
Six4
MYB107
MYB99
NAC010
SMB
ERF010
ERF023
ERF115
NAC002
JUB1
NAC69
HSFA1B
HSFB4
LBD13
MYB44
MYB49
MYB88
MYB96
TRB1
ASIL2
AT5G05550
MYB58
NAC004
NAC007
NAC031
NAC035
NAC037
NAC045
NAC053
NAC101
NAC68
ZAT6
NAC105
ceh-36
ceh-60
cnd-1
lin-32
mdl-1
mxl-3
sta-1
clk
crp
cyc
D1
D19B
fru
ftz-f1
grn
pita
Sox100B
ZIPIC
Pgr
BCL11A
EPAS1
IKZF2
ZBTB11
ZNF157
ZNF547
ZNF558
Nr1h3
Ppara
Nanog
URI
MYB3R3
REV
BAD1
ZmbZIP25
ZmbZIP54
ZmbZIP57
ZmbZIP72
ZmbZIP96
EREB127
EREB138
EREB29
EREB71
IG1
UB3
SBP6
SBP8
OsbZIP42
OsbZIP69
OsbZIP77
SPL11A
SPL12B
SPL13B
SPL13D
SPL15A
SPL15D
SPL16A
SPL18A
SPL19B
SPL1D
SPL2A
SPL2B
SPL3A
SPL3B
SPL3D
SPL4A
SPL4D
SPL5A
SPL5D
SPL6A
SPL7A
SPL7B
SPL8A
SPL8B
SPL8D1

## Sheet: DE-TFs
DE-TFs
Klf4
IRF1
Myc
EGR1
BHLHE40
EGR2
FOS
FOSL1
FOSL2
JUN
JUNB
MAFF
Atf3
CEBPD
NR4A1
CREM
KLF6
NFIL3
SOX17
REL
GRHL1
Creb5
ETS2
ZNF331
BNC2
