# Supplementary material for: Identification of mitochondria-related genes associated with anesthetics in patients undergoing off-pump coronary artery bypass grafting surgery
Source: Front Surg. 2025 Jul 9;12:1515732. doi: 10.3389/fsurg.2025.1515732 (PMC12283725; doi:10.3389/fsurg.2025.1515732)
Supplement: Supplementary Table S6 — The relationship between four hub genes and TFs. [file Table6.xlsx]

## Sheet: Sheet1
hubgene	motif_id	motif_alt_id	sequence_name	start	stop	strand	score	p-value	q-value	matched_sequence
MCL1	MA0025.1	MA0025.1.NFIL3	range=chr1	150575808	150575818	-	14.202	1.51e-05	0.047	TTACGTAACGG
MCL1	MA0025.1	MA0025.1.NFIL3	range=chr1	150575811	150575821	+	13.7172	2.25e-05	0.047	TTACGTAACCG
MCL1	MA0039.4	MA0039.4.KLF4	range=chr1	150574768	150574779	+	15.2364	4.01e-06	0.00792	CTCCCCACCCTT
MCL1	MA0039.4	MA0039.4.KLF4	range=chr1	150574737	150574748	+	14.8636	5.48e-06	0.00792	TCCCCCACCCTT
MCL1	MA0039.4	MA0039.4.KLF4	range=chr1	150575895	150575906	+	14.4545	6.57e-06	0.00792	GGCCCCGCCCCG
MCL1	MA0039.4	MA0039.4.KLF4	range=chr1	150574702	150574713	+	14	8.11e-06	0.00792	TGCCCCACCCGA
MCL1	MA0039.4	MA0039.4.KLF4	range=chr1	150576132	150576143	+	12.8455	1.52e-05	0.0119	CACCACACCCAG
MCL1	MA0039.4	MA0039.4.KLF4	range=chr1	150576008	150576019	+	11.6545	3.77e-05	0.0246	GGCGCCACCCCG
MCL1	MA0147.4	MA0147.4.MYC	range=chr1	150575474	150575481	-	14.9268	9.9e-06	0.039	CCACGTGC
MCL1	MA0162.4	MA0162.4.EGR1	range=chr1	150575897	150575910	+	13.6911	1e-05	0.0191	CCCCGCCCCGGCCC
MCL1	MA0162.4	MA0162.4.EGR1	range=chr1	150575891	150575904	+	13.626	1.05e-05	0.0191	CCCCGGCCCCGCCC
MCL1	MA1517.1	MA1517.1.KLF6	range=chr1	150576132	150576142	+	14.9138	4.06e-06	0.016	CACCACACCCA
MCL1	MA1517.1	MA1517.1.KLF6	range=chr1	150575895	150575905	+	13.8448	1.09e-05	0.0215	GGCCCCGCCCC
MCL1	MA1928.1	MA1928.1.BNC2	range=chr1	150574456	150574467	-	14.8662	2.11e-06	0.00881	GTGTGAGTCACT
RGS2	MA0039.4	MA0039.4.KLF4	range=chr1	192808988	192808999	+	14.8636	5.48e-06	0.0223	GGCCCCGCCCCC
RGS2	MA0050.2	MA0050.2.IRF1	range=chr1	192807497	192807517	-	15	3.83e-06	0.0156	ATCTATTTTCACTTTCTGATG
RGS2	MA0147.3	MA0147.3.MYC	range=chr1	192808213	192808224	+	15.2846	2.8e-06	0.0111	AGCCACGTGCCT
RGS2	MA0162.4	MA0162.4.EGR1	range=chr1	192808664	192808677	+	15.8374	1.9e-06	0.00745	CGGCGCCCCCGCCG
RGS2	MA0476.2	MA0476.2.FOS	range=chr1	192808045	192808052	+	14.1915	1.79e-05	0.0498	TGACTCAT
RGS2	MA0476.2	MA0476.2.FOS	range=chr1	192807492	192807499	+	13.8723	3.58e-05	0.0498	TGAGTCAT
RGS2	MA0476.2	MA0476.2.FOS	range=chr1	192808044	192808051	-	13.8723	3.58e-05	0.0498	TGAGTCAT
RGS2	MA0477.2	MA0477.2.FOSL1	range=chr1	192808042	192808054	+	15.5636	2.45e-06	0.0102	GAATGACTCATGA
RGS2	MA0477.2	MA0477.2.FOSL1	range=chr1	192808042	192808054	-	13.3636	1.9e-05	0.0397	TCATGAGTCATTC
RGS2	MA0478.1	MA0478.1.FOSL2	range=chr1	192808042	192808052	+	15.3636	5.7e-06	0.0237	GAATGACTCAT
RGS2	MA0489.1	MA0489.1.JUN	range=chr1	192808039	192808052	+	15.3077	4.09e-06	0.0171	CAAGAATGACTCAT
RGS2	MA0490.2	MA0490.2.JUNB	range=chr1	192808042	192808054	+	15.8548	2.9e-06	0.0121	GAATGACTCATGA
RGS2	MA0490.2	MA0490.2.JUNB	range=chr1	192808042	192808054	-	13.5	1.38e-05	0.0287	TCATGAGTCATTC
RGS2	MA0490.2	MA0490.2.JUNB	range=chr1	192807489	192807501	-	12.1129	3.33e-05	0.0462	TGATGACTCAATA
RGS2	MA1517.1	MA1517.1.KLF6	range=chr1	192808988	192808998	+	13.8448	1.09e-05	0.0443	GGCCCCGCCCC
RGS2	MA1726.1	MA1726.1.ZNF331	range=chr1	192808335	192808348	+	13.7248	1.04e-05	0.0423	AGCTGCAGAGCAGA
PPP1R15A	MA0039.3	MA0039.3.KLF4	range=chr19	48872842	48872852	-	13.8807	9.59e-06	0.0368	TCACACCCTCC
PPP1R15A	MA0477.1	MA0477.1.FOSL1	range=chr19	48871709	48871719	+	15.6182	3.77e-06	0.0157	GGTGACTCACG
PPP1R15A	MA0478.2	MA0478.2.FOSL2	range=chr19	48871709	48871718	+	15.4727	5.32e-06	0.022	GGTGACTCAC
PPP1R15A	MA0490.1	MA0490.1.JUNB	range=chr19	48871708	48871718	+	14.6327	9.41e-06	0.0393	CGGTGACTCAC
PPP1R15A	MA0495.1	MA0495.1.MAFF	range=chr19	48871354	48871371	-	13.7333	1.15e-05	0.0479	CCACACTCAGCTAATTTT
PPP1R15A	MA0605.2	MA0605.2.ATF3	range=chr19	48872361	48872372	-	14.6383	4.31e-06	0.0104	GCTGACGTCACG
PPP1R15A	MA0605.2	MA0605.2.ATF3	range=chr19	48872361	48872372	+	14.3191	4.97e-06	0.0104	CGTGACGTCAGC
PPP1R15A	MA0609.3	MA0609.3.CREM	range=chr19	48872362	48872371	+	15.2575	4.06e-06	0.00803	GTGACGTCAG
PPP1R15A	MA0609.3	MA0609.3.CREM	range=chr19	48872362	48872371	-	15.2575	4.06e-06	0.00803	CTGACGTCAC
PPP1R15A	MA1517.1	MA1517.1.KLF6	range=chr19	48872239	48872249	-	16.069	1.05e-06	0.0039	GACCACGCCCC
PPP1R15A	MA1517.1	MA1517.1.KLF6	range=chr19	48871838	48871848	-	12.8448	2.35e-05	0.029	CGCCACGCCCG
PPP1R15A	MA1517.1	MA1517.1.KLF6	range=chr19	48871974	48871984	-	12.8448	2.35e-05	0.029	CGCCACGCCCG
PPP1R15A	MA1928.1	MA1928.1.BNC2	range=chr19	48871709	48871720	-	13.8239	9.6e-06	0.0401	GCGTGAGTCACC
MAFF	MA0039.4	MA0039.4.KLF4	range=chr22	38200028	38200039	-	15.2182	4.11e-06	0.0079	AGCCCCACCCAA
MAFF	MA0039.4	MA0039.4.KLF4	range=chr22	38201884	38201895	-	14.8636	5.48e-06	0.0079	GGCCCCGCCCCC
MAFF	MA0039.4	MA0039.4.KLF4	range=chr22	38201852	38201863	-	14.4	6.86e-06	0.0079	AGCCCCGCCCCC
MAFF	MA0039.4	MA0039.4.KLF4	range=chr22	38201868	38201879	-	13.8909	8.66e-06	0.0079	GACCCCGCCCCC
MAFF	MA0039.4	MA0039.4.KLF4	range=chr22	38201422	38201433	-	10.9091	6.96e-05	0.0448	CTCCCCACCTCA
MAFF	MA0039.4	MA0039.4.KLF4	range=chr22	38200677	38200688	-	10.8273	7.36e-05	0.0448	CACCGCACCCAG
MAFF	MA0050.2	MA0050.2.IRF1	range=chr22	38200528	38200548	-	15.2419	3.33e-06	0.0104	TTTTTCTTTTTCTTTTTTTTT
MAFF	MA0050.2	MA0050.2.IRF1	range=chr22	38200534	38200554	-	14.129	6.21e-06	0.0104	TGCTTCTTTTTCTTTTTCTTT
MAFF	MA0050.2	MA0050.2.IRF1	range=chr22	38200532	38200552	-	13.7419	7.63e-06	0.0104	CTTCTTTTTCTTTTTCTTTTT
MAFF	MA0050.2	MA0050.2.IRF1	range=chr22	38200526	38200546	-	11.8871	1.91e-05	0.0196	TTTCTTTTTCTTTTTTTTTTT
MAFF	MA0050.2	MA0050.2.IRF1	range=chr22	38200809	38200829	-	9.25806	6.01e-05	0.0212	TTGTATTTTTTTTTTTTTTTT
MAFF	MA0050.2	MA0050.2.IRF1	range=chr22	38200794	38200814	-	8.45161	8.27e-05	0.0212	TTTTTTTTTTTTTTTTTTTTT
MAFF	MA0050.2	MA0050.2.IRF1	range=chr22	38200795	38200815	-	8.45161	8.27e-05	0.0212	TTTTTTTTTTTTTTTTTTTTT
MAFF	MA0050.2	MA0050.2.IRF1	range=chr22	38200796	38200816	-	8.45161	8.27e-05	0.0212	TTTTTTTTTTTTTTTTTTTTT
MAFF	MA0050.2	MA0050.2.IRF1	range=chr22	38200797	38200817	-	8.45161	8.27e-05	0.0212	TTTTTTTTTTTTTTTTTTTTT
MAFF	MA0050.2	MA0050.2.IRF1	range=chr22	38200798	38200818	-	8.45161	8.27e-05	0.0212	TTTTTTTTTTTTTTTTTTTTT
MAFF	MA0050.2	MA0050.2.IRF1	range=chr22	38200799	38200819	-	8.45161	8.27e-05	0.0212	TTTTTTTTTTTTTTTTTTTTT
MAFF	MA0050.2	MA0050.2.IRF1	range=chr22	38200800	38200820	-	8.45161	8.27e-05	0.0212	TTTTTTTTTTTTTTTTTTTTT
MAFF	MA0050.2	MA0050.2.IRF1	range=chr22	38200801	38200821	-	8.45161	8.27e-05	0.0212	TTTTTTTTTTTTTTTTTTTTT
MAFF	MA0050.2	MA0050.2.IRF1	range=chr22	38200802	38200822	-	8.45161	8.27e-05	0.0212	TTTTTTTTTTTTTTTTTTTTT
MAFF	MA0050.2	MA0050.2.IRF1	range=chr22	38200803	38200823	-	8.45161	8.27e-05	0.0212	TTTTTTTTTTTTTTTTTTTTT
MAFF	MA0050.2	MA0050.2.IRF1	range=chr22	38200804	38200824	-	8.45161	8.27e-05	0.0212	TTTTTTTTTTTTTTTTTTTTT
MAFF	MA0050.2	MA0050.2.IRF1	range=chr22	38200522	38200542	-	8.08065	9.54e-05	0.023	TTTTTCTTTTTTTTTTTTTGA
MAFF	MA0147.3	MA0147.3.MYC	range=chr22	38200000	38200011	-	16.3252	4.43e-07	0.0016	GGCCACGTGCGG
MAFF	MA0162.2	MA0162.2.EGR1	range=chr22	38201849	38201862	-	17.4808	6.32e-07	0.00184	GCCCCGCCCCCGGG
MAFF	MA0162.2	MA0162.2.EGR1	range=chr22	38201881	38201894	-	17.0577	9.29e-07	0.00184	GCCCCGCCCCCGTA
MAFF	MA0162.2	MA0162.2.EGR1	range=chr22	38201865	38201878	-	14.4231	6.84e-06	0.00906	ACCCCGCCCCCTGG
MAFF	MA0162.2	MA0162.2.EGR1	range=chr22	38200723	38200736	-	11.2115	4.32e-05	0.0399	AATCCACCCACGCT
MAFF	MA0162.2	MA0162.2.EGR1	range=chr22	38201769	38201782	+	10.7308	5.45e-05	0.0399	CCTACACCCACGGG
MAFF	MA0162.2	MA0162.2.EGR1	range=chr22	38200450	38200463	-	10.5192	6.03e-05	0.0399	CAACCTCCGCCTCC
MAFF	MA0162.2	MA0162.2.EGR1	range=chr22	38201438	38201451	-	9.94231	7.88e-05	0.0447	ATCCCTCCCTCTCC
MAFF	MA0472.2	MA0472.2.EGR2	range=chr22	38200723	38200733	-	13.7759	8.67e-06	0.0319	CCACCCACGCT
MAFF	MA0472.2	MA0472.2.EGR2	range=chr22	38201881	38201891	-	11.6552	2.44e-05	0.0448	CCGCCCCCGTA
MAFF	MA0476.1	MA0476.1.FOS	range=chr22	38200400	38200410	+	14.1489	1.49e-05	0.0411	GGTGACTCACC
MAFF	MA0476.1	MA0476.1.FOS	range=chr22	38200400	38200410	-	13.8298	1.97e-05	0.0411	GGTGAGTCACC
MAFF	MA0477.1	MA0477.1.FOSL1	range=chr22	38200400	38200410	+	15.4727	4.69e-06	0.0196	GGTGACTCACC
MAFF	MA0477.1	MA0477.1.FOSL1	range=chr22	38200400	38200410	-	14.8364	9.37e-06	0.0196	GGTGAGTCACC
MAFF	MA0478.1	MA0478.1.FOSL2	range=chr22	38200399	38200409	+	15.4182	5.14e-06	0.0215	TGGTGACTCAC
MAFF	MA0478.1	MA0478.1.FOSL2	range=chr22	38200401	38200411	-	13.8182	1.96e-05	0.0409	AGGTGAGTCAC
MAFF	MA0490.1	MA0490.1.JUNB	range=chr22	38200399	38200409	+	14.6122	1.01e-05	0.0387	TGGTGACTCAC
MAFF	MA0490.1	MA0490.1.JUNB	range=chr22	38200401	38200411	-	13.7959	1.85e-05	0.0387	AGGTGAGTCAC
MAFF	MA1517.1	MA1517.1.KLF6	range=chr22	38201885	38201895	-	13.8448	1.09e-05	0.0257	GGCCCCGCCCC
MAFF	MA1517.1	MA1517.1.KLF6	range=chr22	38201869	38201879	-	13.3966	1.5e-05	0.0257	GACCCCGCCCC
MAFF	MA1517.1	MA1517.1.KLF6	range=chr22	38201853	38201863	-	13.0517	2.08e-05	0.0257	AGCCCCGCCCC
MAFF	MA1517.1	MA1517.1.KLF6	range=chr22	38200029	38200039	-	11.8966	4.63e-05	0.0429	AGCCCCACCCA
MAFF	MA1928.1	MA1928.1.BNC2	range=chr22	38200400	38200411	-	14.4577	5.34e-06	0.0222	AGGTGAGTCACC
